# Supplementary material for: Identification of subtype-specific genes signature by WGCNA for prognostic prediction in diffuse type gastric cancer
Source: Aging (Albany NY). 2020 Sep 11;12(17):17418–35. doi: 10.18632/aging.103743 (PMC7521533; doi:10.18632/aging.103743)
Supplement: Supplementary Figures [file aging-12-103743-s006..pdf]

[www.aging-us.com](http://www.aging-us.com)

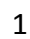

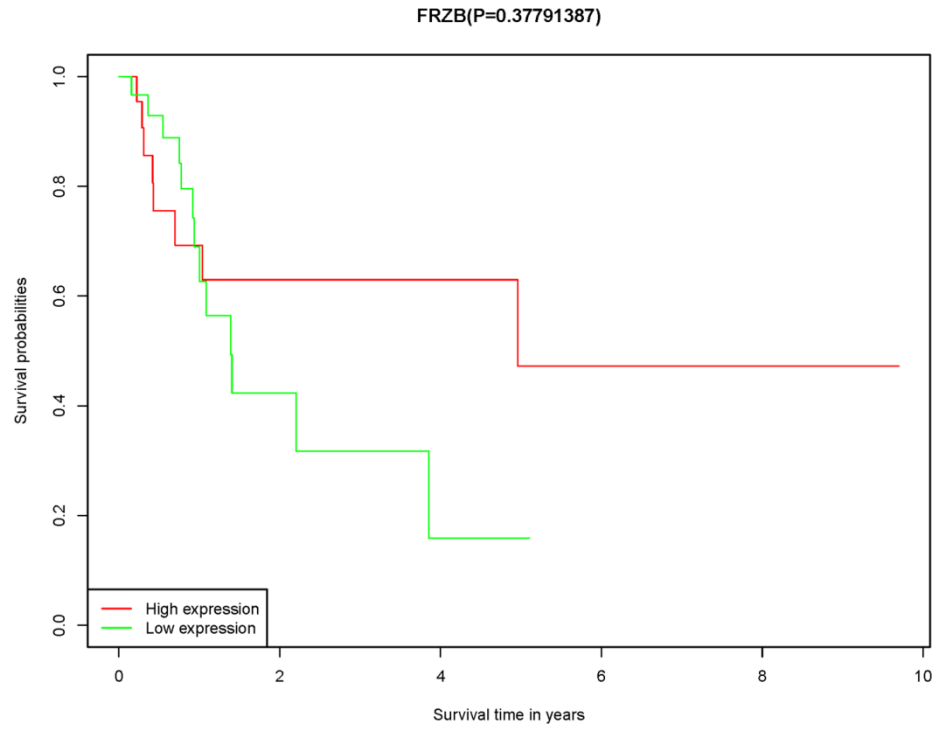

**Supplementary Figure 2.** The relation of high- and low expression of 10 hub genes for OS.

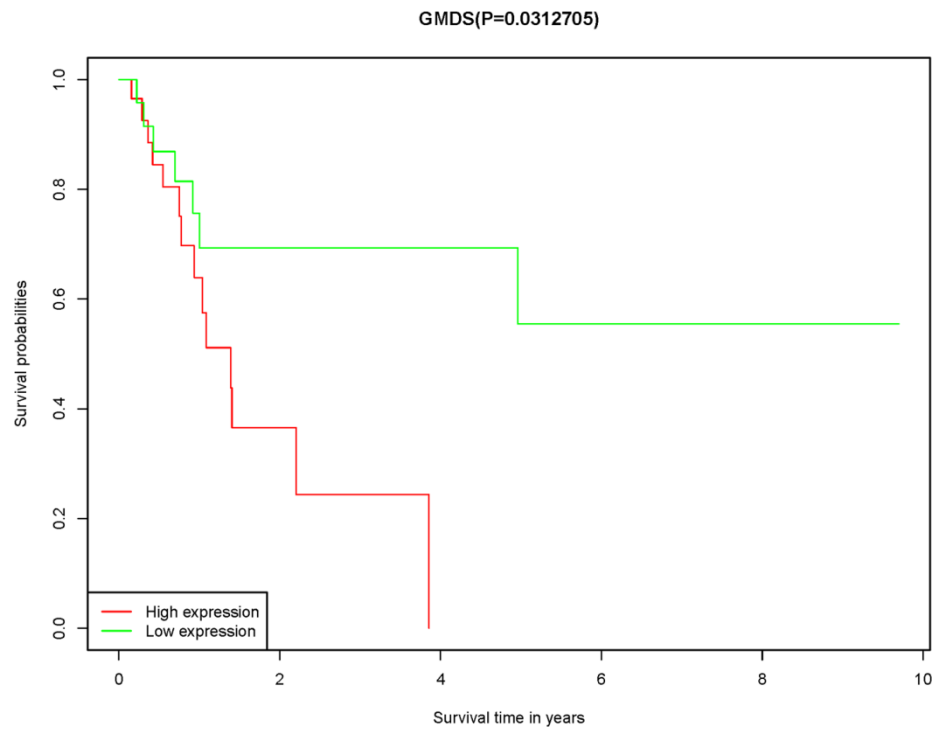

**Supplementary Figure 3.** The relation of high- and low expression of 10 hub genes for OS.

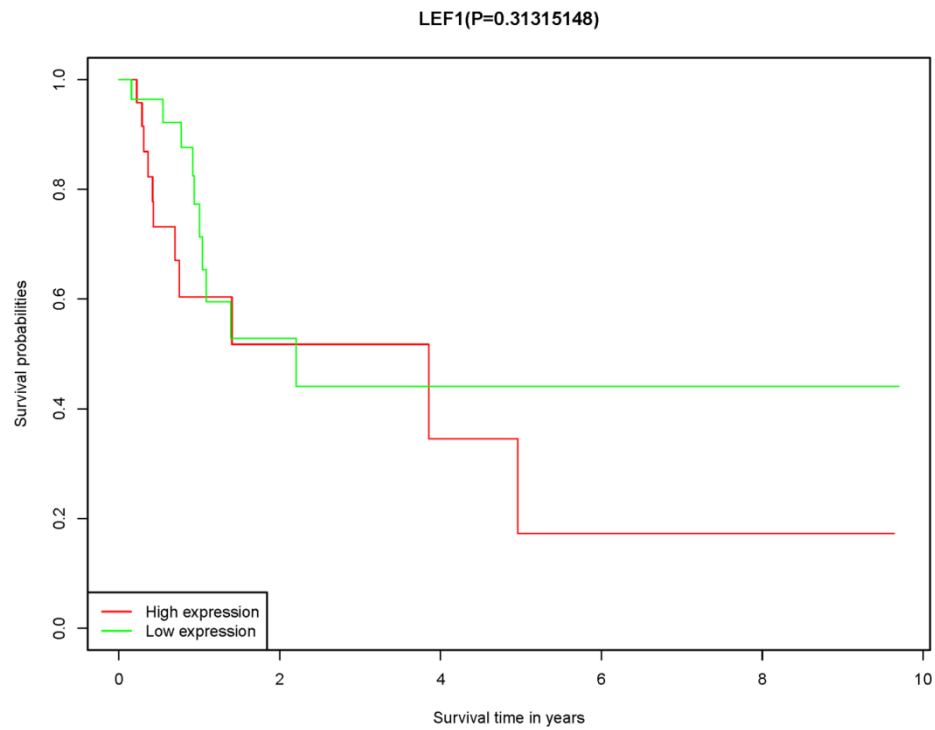

Supplementary Figure 4. The relation of high- and low expression of 10 hub genes for OS.

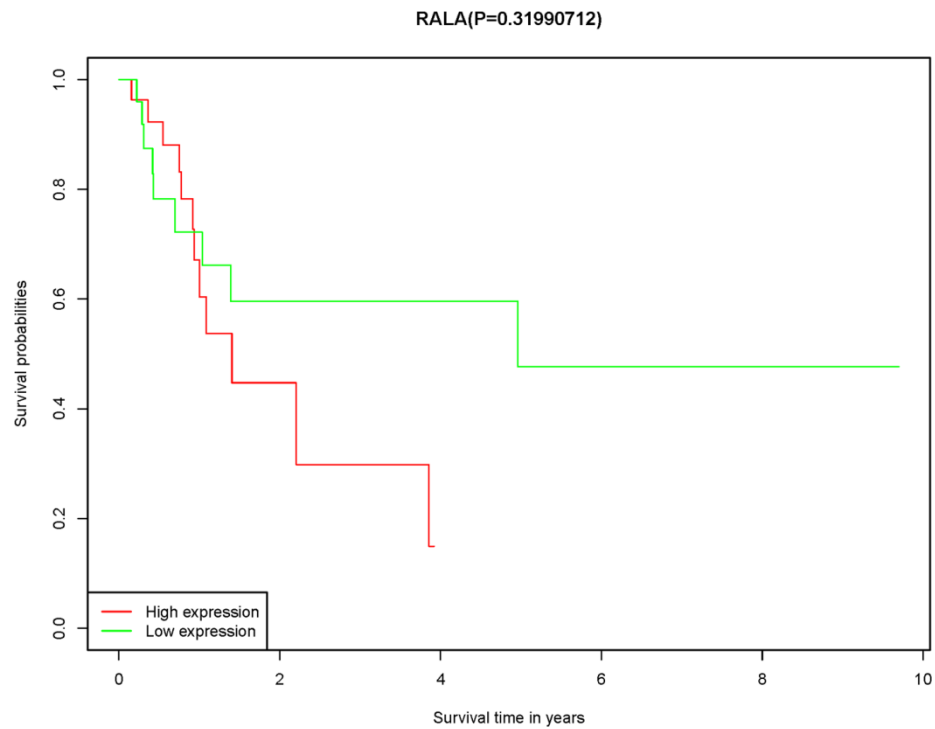

Supplementary Figure 5. The relation of high- and low expression of 10 hub genes for OS.

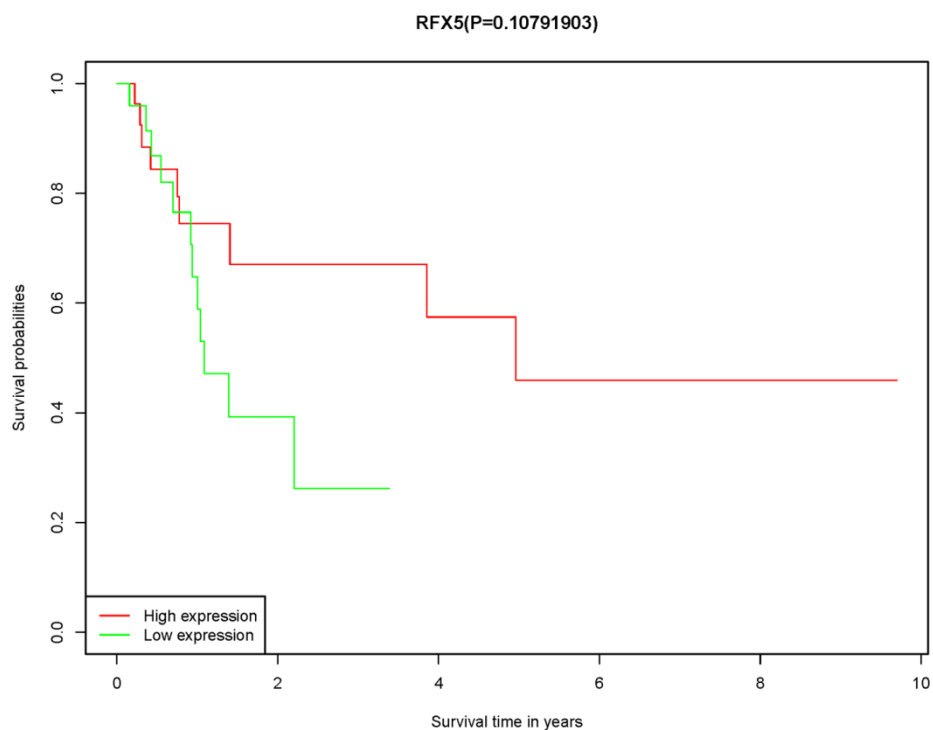

Supplementary Figure 6. The relation of high- and low expression of 10 hub genes for OS.

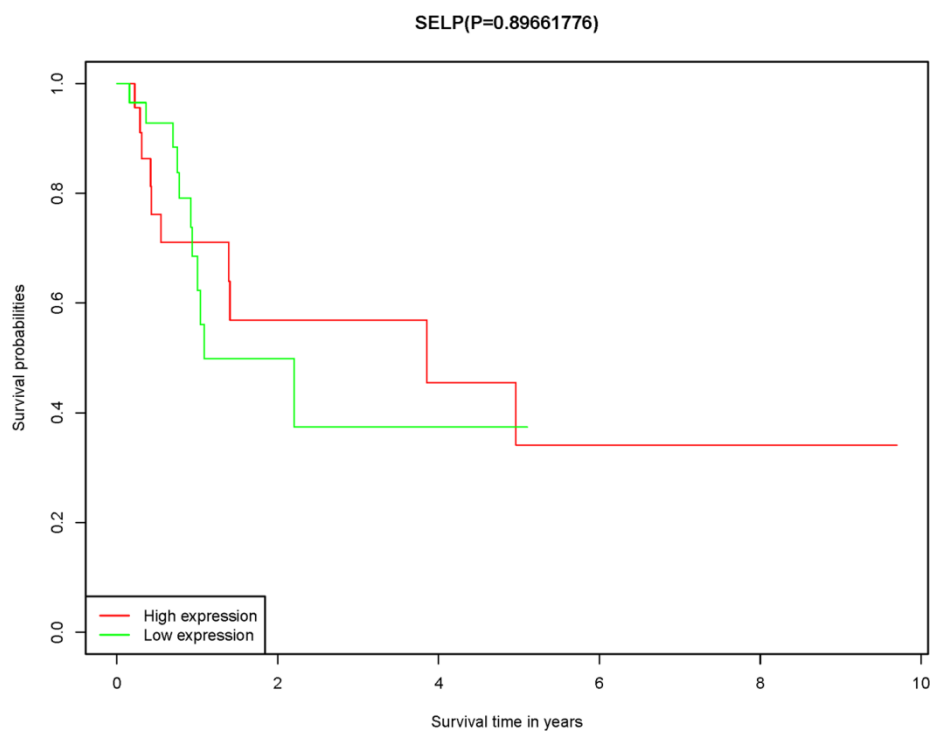

Supplementary Figure 7. The relation of high- and low expression of 10 hub genes for OS.

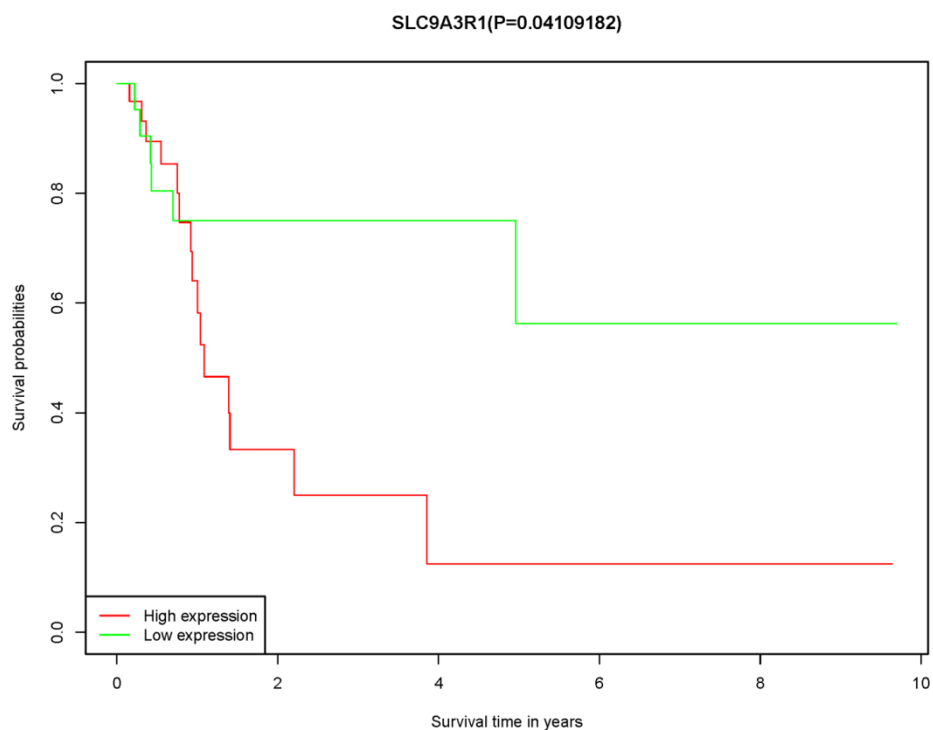

**Supplementary Figure 8.** The relation of high- and low expression of 10 hub genes for OS.

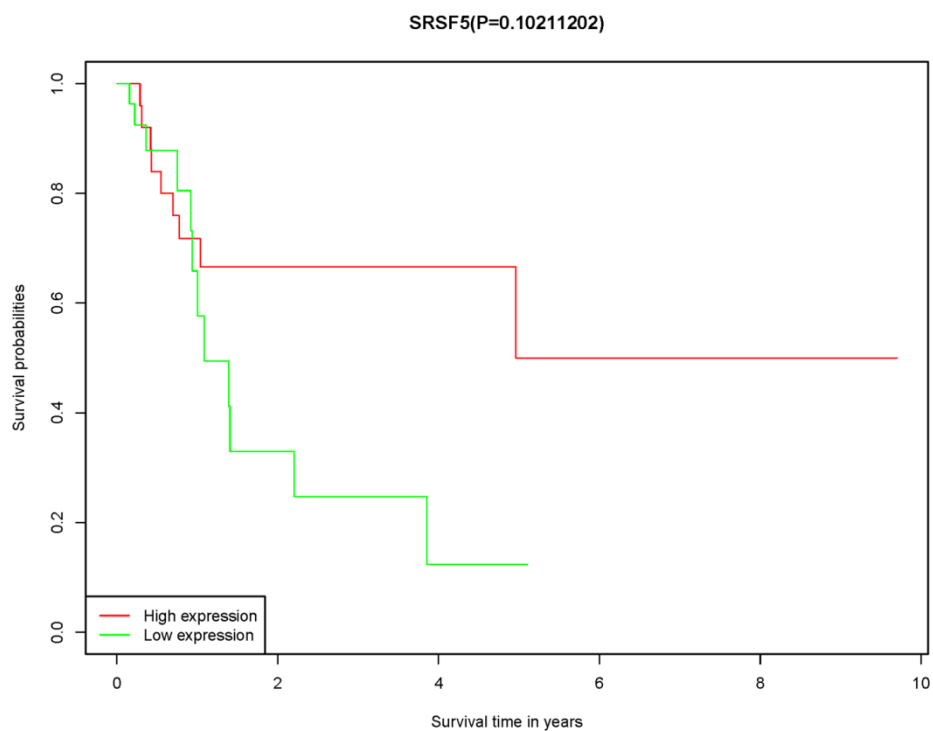

**Supplementary Figure 9.** The relation of high- and low expression of 10 hub genes for OS.

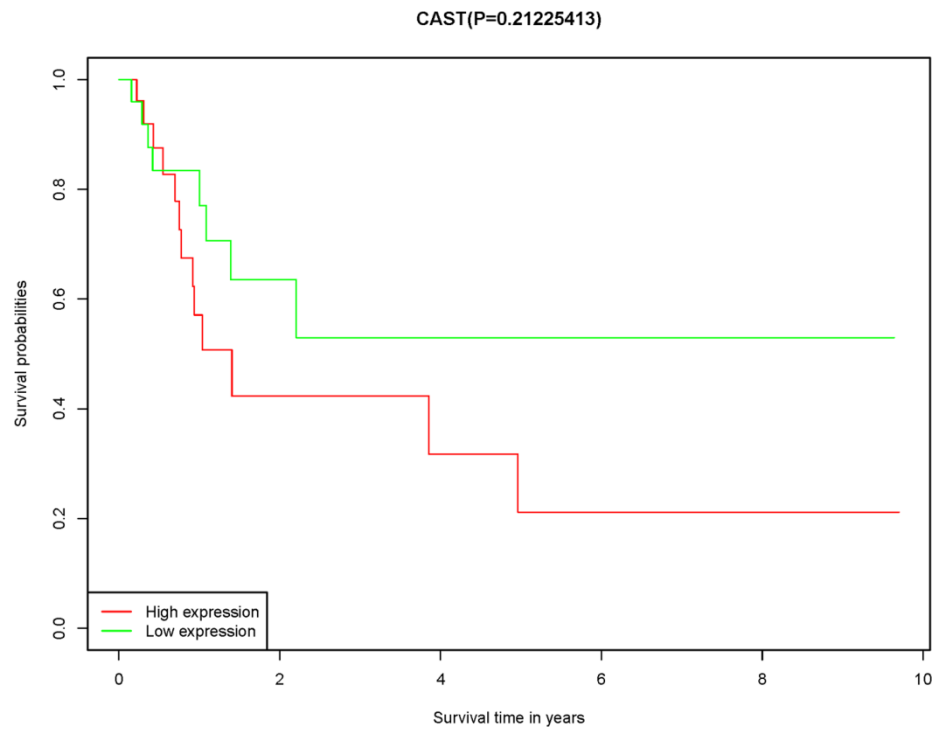

Supplementary Figure 10. The relation of high- and low expression of 10 hub genes for OS.

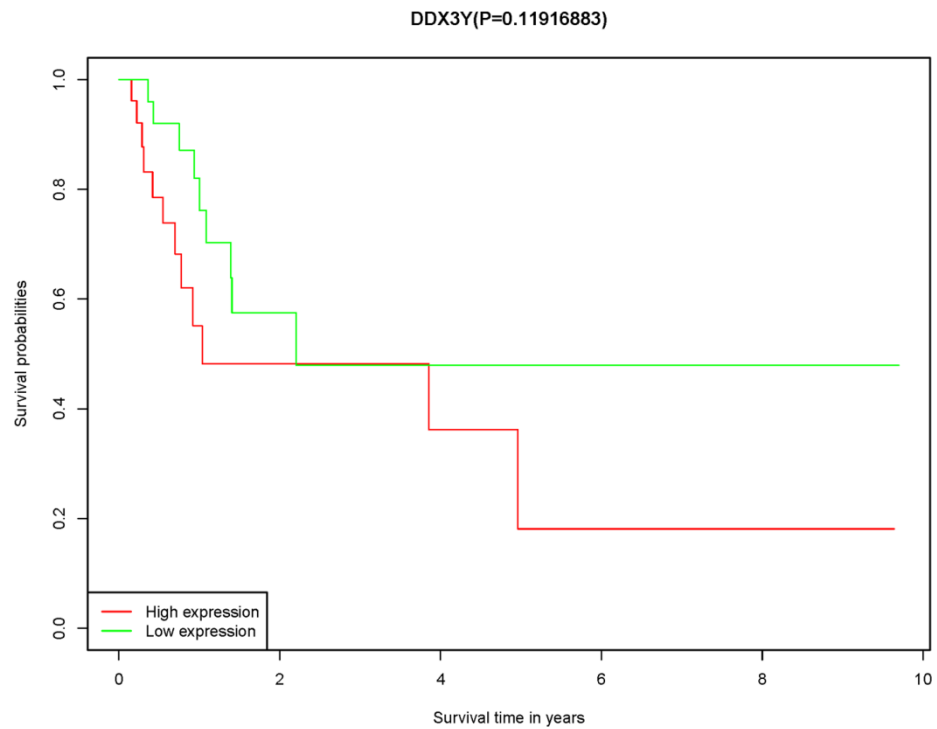

Supplementary Figure 11. The relation of high- and low expression of 10 hub genes for OS.
