# Supplementary material for: Identification of subtype-specific genes signature by WGCNA for prognostic prediction in diffuse type gastric cancer
Source: Aging (Albany NY). 2020 Sep 11;12(17):17418–35. doi: 10.18632/aging.103743 (PMC7521533; doi:10.18632/aging.103743)
Supplement: Supplementary Table 1 [file aging-12-103743-s003..xlsx]

## Sheet: 0.1_multicox_input
Supplementary Table 1. 10 hub genes expression and risk score for TCGA samples.
id	status	OS_Time	RALA	DDX3Y	SRSF5	SLC9A3R1	GMDS	LEF1	RFX5	CAST	FRZB	SELP	risk_score	risk_level
TCGA-B7-5818	0	0.00821918	58.5859	3.41058	63.3383	548.446	279.005	4.78153	46.5798	33.3321	2.93473	0.605495	5.37632	Low
TCGA-B7-A5TI	0	0.630137	44.0912	25.3721	53.3466	183.788	296.693	16.5903	64.7879	50.5463	27.6358	7.86832	21.3997	High
TCGA-BR-6564	0	0.0684932	32.2624	0.050631	47.1998	195.563	94.1176	28.6131	45.2526	65.9319	179.133	29.6625	16698.2	High
TCGA-BR-6803	0	0.0547945	45.2266	0	58.867	248.232	125.405	16.2061	40.9285	67.7344	143.736	46.8359	3231.46	High
TCGA-BR-8291	0	0.0986301	53.6264	40.0514	112.901	160.523	262.872	10.3918	42.1491	67.3539	69.4928	42.9832	115.664	High
TCGA-BR-8297	0	0.0630137	45.1078	32.9634	78.5569	151.201	70.999	11.0327	48.8561	84.1218	127.284	16.8587	40.5663	High
TCGA-BR-8364	0	0.183562	62.5236	0.0180254	92.5598	183.136	141.724	19.4377	40.7089	94.369	97.264	31.5032	20.6969	High
TCGA-BR-8592	0	0.0164384	54.6167	0.0336403	89.6408	168.702	57.3052	28.9578	51.9505	96.9133	205.421	40.417	1165.69	High
TCGA-BR-A44T	0	0.0356164	45.6757	0.0243524	149.594	133.366	41.654	31.4864	58.898	58.3105	129.526	31.7905	0.000205077	Low
TCGA-BR-A4IV	0	0.0767123	52.822	64.6672	126.774	60.4277	43.1722	7.85372	43.9616	96.1117	127.668	41.1909	16.8216	High
TCGA-CD-8530	0	0.0136986	78.3486	36.6883	61.9179	117.775	78.0557	16.239	44.8146	67.1513	58.4795	26.3414	281.323	High
TCGA-CD-8531	0	0.00821918	54.4628	0.176214	118.544	74.3274	15.6708	5.65817	141.47	54.4699	4.25107	5.23196	1.81111e-14	Low
TCGA-CD-A487	0	0.0109589	54.5659	13.6486	118.439	191.575	27.6392	6.70094	15.3808	51.4337	26.6474	6.83718	0.00125358	Low
TCGA-CD-A489	0	0.0109589	92.5542	48.7896	119.145	130.313	20.6939	27.5175	58.5344	92.7117	197.405	42.2696	13838.8	High
TCGA-CD-A4MG	0	0.00547945	82.9629	19.0671	86.1037	128.357	72.5673	14.1159	37.0861	43.8886	5.13777	7.87102	0.0416095	Low
TCGA-CG-4444	0	3.92055	66.4062	13.9954	149.192	200.837	87.9516	8.79124	83.3338	71.997	27.5603	12.9359	3.24755e-08	Low
TCGA-CG-4465	1	0.750685	113.146	0.0205603	72.7845	439.896	233.195	21.3459	46.8195	103.37	6.28677	3.97193	989.7	High
TCGA-CG-5724	1	1.00274	118.183	3.05917	37.1935	409.059	29.462	5.09471	24.3226	43.6777	1.28428	1.70783	108.742	High
TCGA-D7-6519	0	1.30411	97.1269	0.00978352	89.5565	384.065	68.3463	6.74366	36.7601	92.6085	20.9141	4.61649	0.217569	Low
TCGA-D7-6521	0	0.682192	70.4955	11.8927	48.9887	387.418	100.631	13.3525	34.5948	35.2237	28.4345	21.6281	103.736	High
TCGA-D7-6522	0	0.575342	32.8345	13.3538	42.5166	265.489	54.8517	31.1918	40.6604	19.6887	67.7105	45.2095	171.475	High
TCGA-D7-6524	0	0.0575342	79.8265	29.2813	80.8328	320.147	152.205	33.7232	42.4269	76.3239	37.4813	38.2121	9069.15	High
TCGA-D7-6525	0	0.49589	54.947	3.85745	33.8141	289.82	11.3994	6.21907	44.4956	85.3363	11.3376	2.572	0.108768	Low
TCGA-D7-6818	0	0.339726	52.6865	8.69337	28.1545	265.833	99.92	12.9698	32.3297	74.2096	14.6379	17.8217	113.672	High
TCGA-D7-A747	1	0.69863	50.2306	42.4999	102.923	141.366	28.6708	44.0193	44.925	90.571	151.707	15.1344	4874.61	High
TCGA-D7-A748	1	0.361644	67.3618	0.0329698	34.4848	382.243	113.051	34.0533	15.882	51.467	19.2352	14.2563	44302.7	High
TCGA-FP-7916	0	0.252055	58.6211	17.7244	78.6506	435.94	141.847	22.0809	51.8274	79.2272	116.687	17.1764	2422	High
TCGA-FP-7998	0	0.29863	47.5639	23.3767	66.3628	190.588	95.8243	14.1633	95.4222	83.7741	84.2644	15.7726	0.0106727	Low
TCGA-FP-8209	1	4.96164	35.8188	65.9789	167.525	75.153	28.1744	39.3471	71.9086	96.2679	49.4335	58.7745	0.000866388	Low
TCGA-FP-8210	1	0.419178	47.0259	40.1322	107.308	162.086	114.403	42.3338	47.3115	73.2527	96.8204	110.376	16459.6	High
TCGA-FP-A4BF	0	0.128767	82.051	17.7343	76.7742	120.284	56.421	20.3852	33.4379	49.3673	14.6413	8.62568	0.606323	Low
TCGA-FP-A8CX	0	0.0191781	100.072	7.54025	63.5964	327.844	207.259	3.39705	20.3256	49.4091	3.98735	3.75156	357.985	High
TCGA-HJ-7597	1	2.20548	107.925	0.0490218	57.8432	271.81	163.897	2.63395	46.0634	71.6279	2.68655	1.66032	1.98732	Low
TCGA-HU-8602	0	0.950685	68.4926	0.0268392	55.7808	254.388	39.7412	4.05045	89.3707	73.3644	2.84109	2.22106	4.51678e-06	Low
TCGA-HU-8608	0	0.884932	88.3387	24.1232	85.782	150.293	67.1218	8.99409	99.1652	40.2844	15.8069	1.87019	3.71932e-06	Low
TCGA-HU-A4G2	0	2.02466	96.0968	8.79061	116.151	392.264	143.207	11.1956	28.7485	47.0959	21.0394	0.440072	0.352349	Low
TCGA-HU-A4G8	0	0.986301	76.6957	0.0555886	125.842	124.556	228.702	6.90173	120.708	86.0901	11.9537	1.96498	3.24025e-09	Low
TCGA-HU-A4GC	0	0.271233	100.86	25.6196	63.5249	434.567	106.17	5.64179	34.9673	47.2722	14.4064	9.90658	199.535	High
TCGA-HU-A4GJ	0	1.78082	47.1725	0	118.139	159.942	90.2685	27.0045	69.3145	43.1779	23.1547	24.1309	2.97485e-06	Low
TCGA-HU-A4GP	0	0.747945	92.6474	0.00942145	61.3363	478.743	170.333	6.72602	31.6982	69.2126	13.1988	8.92227	159.788	High
TCGA-HU-A4GU	0	0.520548	86.9791	3.25261	76.3379	387.511	78.0175	35.5174	48.3287	86.5657	4.25106	0.355526	3.3808	Low
TCGA-HU-A4GX	0	0.849315	90.6725	0.266313	89.3646	182.432	156.873	3.5541	56.6458	57.386	9.19725	6.26675	0.00117793	Low
TCGA-HU-A4GY	0	0.0219178	65.7423	0.0786141	165.379	163.956	88.5467	45.2927	72.015	84.0147	54.7403	47.066	3.16718e-05	Low
TCGA-HU-A4H0	0	0.175342	93.4768	19.479	72.539	509.989	196.603	3.88891	80.7475	99.3474	8.54268	3.058	0.590354	Low
TCGA-HU-A4H3	0	1.6137	78.1179	0.187548	85.6038	180.426	112.233	2.49612	29.914	57.6632	5.60818	2.82879	0.00858386	Low
TCGA-HU-A4HB	0	0.734247	73.7231	25.3507	87.6033	459.353	125.381	16.1501	61.4372	73.6498	15.9575	19.6014	0.886376	Low
TCGA-IN-7806	0	0.572603	59.6309	10.0128	64.8141	425.462	210.192	7.42107	70.8107	66.855	20.7763	7.33919	0.185306	Low
TCGA-IN-7808	1	0.287671	46.0732	28.4184	125.025	100.626	122.75	49.4802	66.4122	43.5936	318.355	17.5255	214074	High
TCGA-KB-A93G	0	1.18356	61.3497	44.7386	107.888	81.0235	66.2669	16.3214	36.3002	55.6685	77.1709	8.20259	1.91294	Low
TCGA-KB-A93J	0	3.07945	60.1095	34.7355	105.588	583.809	115.667	6.23485	74.6763	84.9898	16.5859	2.4024	0.00560779	Low
TCGA-MX-A5UG	1	0.309589	60.4929	60.511	91.7649	207.963	63.3271	31.9678	61.3856	114.169	97.2536	83.1328	34351	High
TCGA-R5-A7ZI	0	5.10411	39.6831	0.109017	39.7994	74.8939	73.9052	5.03685	60.0626	29.8332	7.31975	1.1053	7.45307e-05	Low
TCGA-RD-A7BS	1	0.920548	66.1523	16.298	59.9589	352.801	71.0868	9.89191	20.8421	86.6829	18.5789	13.6027	114.661	High
TCGA-RD-A7BW	1	0.427397	49.078	0.55031	87.9153	85.9325	15.3526	28.8833	42.1034	154.287	198.913	39.1736	2598.83	High
TCGA-RD-A7C1	1	1.38904	54.3564	6.08019	44.4243	218.704	197.755	8.70846	36.1266	40.3617	20.1483	16.5161	17.5829	High
TCGA-RD-A8N0	0	3.3863	56.7773	0.055607	115.838	144.904	97.3628	17.1906	35.1356	64.8929	39.4553	17.3555	0.00178571	Low
TCGA-RD-A8N1	0	9.6411	41.1925	45.9543	98.8284	235.714	50.4694	24.5623	94.8036	38.7519	25.5213	25.7102	6.45428e-05	Low
TCGA-RD-A8N2	0	9.69863	36.503	0.0282953	151.66	33.699	21.8603	9.61552	60.3091	127.462	65.9806	32.5182	8.89705e-08	Low
TCGA-RD-A8N4	0	5.94795	32.267	0.0411371	203.57	105.277	11.7501	10.6222	64.9175	94.9877	82.3395	33.3269	1.12869e-10	Low
TCGA-RD-A8N9	0	2.96712	57.4375	0.168856	72.4304	135.91	89.0704	26.6517	45.7334	72.6775	48.4549	35.0357	0.933475	Low
TCGA-RD-A8NB	1	1.40548	91.359	0.0115711	70.4356	247.827	158.645	27.4324	69.3341	114.367	18.4781	51.1185	8.79004	Low
TCGA-SW-A7EA	0	0.0356164	110.972	0.0248966	64.4681	123.881	146.723	6.11557	10.233	97.4393	1.9653	0.327465	188.778	High
TCGA-VQ-A8DZ	1	1.08493	96.5946	4.53225	79.7479	609.513	160.761	6.22725	27.738	45.6947	9.37686	12.5933	87.1037	High
TCGA-VQ-A8PC	1	3.85479	77.8167	20.8044	62.2521	210.963	112.921	18.0433	62.3608	85.0812	13.4097	20.6103	1.38899	Low
TCGA-VQ-A8PM	1	0.156164	82.1166	19.9857	58.9946	539.096	212.204	10.3183	36.0944	55.174	21.0993	7.90241	6599.96	High
TCGA-VQ-A8PO	1	0.772603	84.6024	35.7186	98.1298	381.925	142.922	11.3154	53.9049	113.748	5.31748	2.80247	2.39932	Low
TCGA-VQ-A927	1	0.547945	88.2276	22.3041	86.5417	405.319	201.379	11.291	30.6329	128.756	7.04308	49.7496	8284.03	High
TCGA-VQ-A94P	1	0.221918	49.0415	75.8049	79.6147	54.116	27.4376	14.856	66.0515	113.945	218.002	66.8202	1.09077e+06	High
TCGA-VQ-A94T	1	0.936986	110.917	4.11322	59.4113	345.547	120.095	5.7631	40.6232	180.883	7.71606	0.576567	303.811	High
TCGA-VQ-A94U	0	1.28219	72.6242	15.3491	93.6032	176.932	137.513	14.8496	93.2699	87.5479	23.4132	41.2706	0.000344814	Low
TCGA-VQ-AA6K	1	1.03562	43.3144	42.2765	119.203	620.474	217.327	10.2946	35.4832	120.939	23.9609	4.16917	112.581	High
