# Supplementary material for: Identification of subtype-specific genes signature by WGCNA for prognostic prediction in diffuse type gastric cancer
Source: Aging (Albany NY). 2020 Sep 11;12(17):17418–35. doi: 10.18632/aging.103743 (PMC7521533; doi:10.18632/aging.103743)
Supplement: Supplementary Table 2 [file aging-12-103743-s001..xlsx]

## Sheet: log10
Supplementary Table 2. The survival, 10 genes expression and risk score for GSE15459 samples.
id	status	OS	CAST	FRZB	GMDS	RALA	RFX5	SELP	SRSF5	DDX3Y	SLC9A3R1	LEF1	risk_score	risk_level
GSM387795	0	2.25556	3.55705	3.05332	2.2756	3.34962	3.29024	2.92849	3.66944	3.18165	2.27658	2.3799	0.343082	Low
GSM387804	0	1.05556	3.53033	3.43888	3.16322	3.44724	3.24793	2.82551	3.72997	1.08686	2.91149	2.42561	0.337345	Low
GSM387806	0	1.64444	3.46364	2.53279	3.71082	3.71796	3.01761	2.86821	3.47335	2.78925	3.38791	2.43618	0.440505	Low
GSM387809	0	0.391667	3.3789	1.9166	3.66722	3.61164	3.17674	2.23393	3.46336	1.15172	3.57411	2.21049	0.0778138	Low
GSM387814	1	1.43333	3.37213	3.60317	3.07711	3.47003	3.20046	2.89519	3.618	1.5131	3.31699	2.84739	2.46988	High
GSM387816	1	0.138889	3.37051	3.27068	3.00867	3.51268	3.27701	2.77237	3.44657	2.78591	2.98976	2.49155	2.17904	High
GSM387819	1	2.43056	3.39487	2.85933	3.19868	3.69302	3.04824	3.20211	3.59367	2.92397	3.01707	2.52251	0.736853	Low
GSM387826	0	0.922222	3.51197	3.53889	2.60084	3.40509	3.19592	2.84075	3.6259	1.56264	2.64954	2.14547	0.8097	Low
GSM387830	1	7.25	3.22403	2.6877	2.81571	3.57189	3.06881	2.6341	3.51694	2.63337	3.31993	2.54186	1.24897	High
GSM387831	1	0.863889	3.01929	2.08841	3.00464	3.80667	2.73919	2.46449	3.37659	2.39718	3.27605	2.27542	1.37538	High
GSM387832	0	10.4611	3.45028	2.95665	2.77064	3.32726	2.95383	3.17734	3.69555	1.59161	2.63958	2.55259	0.296986	Low
GSM387834	1	3.49722	3.32076	2.95382	2.75735	3.40973	2.98411	2.96152	3.56121	2.94836	3.08197	2.38848	0.991607	Low
GSM387835	1	1.08889	3.30263	2.18827	2.50602	3.73274	2.9942	2.70444	3.3045	1.42642	2.99192	2.54171	1.63774	High
GSM387836	1	1.64722	3.37172	3.5505	3.02224	3.40385	3.26002	2.80209	3.59307	2.96158	3.20527	2.42592	1.61701	High
GSM387837	1	3.125	3.4681	3.23711	3.37469	3.47529	3.13638	2.83312	3.65753	2.78334	2.8427	2.66443	0.534276	Low
GSM387840	0	10.7722	3.39617	3.14604	2.12345	3.32792	3.16811	2.78543	3.52703	3.07847	2.52023	2.0798	1.08153	High
GSM387841	1	0.347222	3.35051	2.92735	2.81985	3.36939	3.06677	3.00016	3.50347	1.28421	3.14872	2.56407	0.952417	Low
GSM387849	1	0.95	3.27497	2.71584	2.99237	3.59487	3.17527	3.29419	3.51545	2.79984	3.18279	2.41682	0.839233	Low
GSM387850	1	0.538889	3.47045	3.1162	2.73152	3.3887	3.10212	3.10919	3.58489	1.43673	2.97988	2.72998	0.933414	Low
GSM387851	1	0.905556	3.29644	2.94086	2.88993	3.42679	3.20787	2.87861	3.33016	2.89591	2.8548	2.71243	2.76631	High
GSM387857	1	0.672222	3.3547	3.17895	2.71175	3.33436	3.0895	3.28202	3.50449	3.01865	3.04769	2.69756	2.17199	High
GSM387858	1	0.772222	3.48763	3.18359	3.11453	3.76049	2.94074	2.49904	3.42367	1.15733	3.20301	2.9104	4.72301	High
GSM387859	1	0.922222	3.45129	2.7836	2.67445	3.39568	3.0983	3.32052	3.46953	2.93213	3.17601	2.68268	1.20799	High
GSM387862	1	0.391667	3.33185	3.27101	3.17083	3.41231	3.16814	3.57887	3.51208	2.84732	2.99793	2.59299	1.5683	High
GSM387864	1	0.358333	3.50318	3.09152	3.25154	3.55787	2.93392	2.79976	3.25224	2.04219	3.24938	2.78419	5.44831	High
GSM387865	1	2.03056	3.33781	3.29223	3.35355	3.81684	2.9913	2.75726	3.49522	2.52993	2.93829	2.45327	2.94148	High
GSM387866	1	1.11389	3.39733	2.88827	3.02754	3.48408	3.0244	2.77554	3.39005	2.84848	3.28856	2.41738	1.68468	High
GSM387867	1	1.9	3.48486	2.67064	3.71482	3.70392	3.03872	3.24076	3.54996	1.51518	3.53924	2.58361	0.395349	Low
GSM387868	0	5.54722	3.37021	2.99016	2.84251	3.56427	3.14101	3.53273	3.54198	1.37486	2.8783	2.68828	1.1697	High
GSM387873	0	8.175	3.19422	2.57139	3.24196	3.6318	3.07737	2.93333	3.45054	2.69099	3.025	2.60141	1.00523	Low
GSM387876	1	2.09722	3.42121	3.46033	3.20011	3.47484	3.09552	3.02565	3.52959	2.92367	3.19087	2.53644	2.17637	High
GSM387877	0	6.04167	3.35724	2.62758	3.34384	3.63736	3.24278	2.35233	3.27543	1.628	3.24324	2.62206	1.50348	High
GSM387878	0	1.96111	3.32886	2.75579	3.09442	3.43696	2.74699	2.96501	3.65404	1.74627	3.24975	2.33554	0.36315	Low
GSM387879	1	2.6	3.3929	2.50474	3.56686	3.61651	2.95723	2.81455	3.55579	2.75001	3.30739	2.21896	0.240403	Low
GSM387880	0	6.24722	3.3999	3.42954	3.19159	3.45296	3.07575	2.94474	3.59135	1.49359	2.95243	2.3576	0.947817	Low
GSM387881	1	1.02222	3.49823	3.23115	3.29731	3.48893	3.07644	2.93404	3.45248	2.77661	3.1317	2.57891	1.68444	High
GSM387884	1	0.822222	3.53071	2.48432	3.51788	3.85393	2.76558	2.74474	3.55912	1.56783	3.41737	2.36579	0.379292	Low
GSM387885	0	3.20278	3.37448	2.55796	3.15615	3.57877	3.0421	3.1174	3.56323	2.77165	3.63585	2.86895	0.781977	Low
GSM387888	0	2.975	3.34731	2.97601	3.23818	3.43324	3.07526	3.38851	3.45381	1.46301	3.16553	2.50205	0.995858	Low
GSM387890	0	0.0333333	3.44095	2.0659	3.72526	3.6858	2.98318	2.32661	3.4775	2.26877	3.0931	2.10527	0.0961961	Low
GSM387891	0	5.38056	3.21021	2.74212	3.36796	3.563	2.95674	2.86015	3.5348	1.45874	3.68051	2.10942	0.565161	Low
GSM387893	0	4.41389	3.40005	2.3451	3.56765	3.57812	2.96553	3.09336	3.40968	0.937938	3.33772	2.34817	0.301145	Low
GSM387897	0	2.025	3.42231	2.70193	3.50008	3.5824	3.07566	2.83275	3.29124	2.58462	3.22839	2.46174	1.30472	High
GSM387899	1	0.980556	3.41199	2.87843	3.41764	3.46591	3.07409	3.39232	3.51808	1.67757	3.16826	2.59529	0.553257	Low
GSM387905	1	0.522222	3.41828	3.18876	3.23644	3.53408	3.12959	3.19325	3.4777	1.33884	3.01887	2.69359	1.52297	High
GSM387906	0	1.08333	3.3746	2.69291	3.45102	3.59271	2.92282	3.02248	3.39969	1.42056	3.32491	2.43952	0.907598	Low
GSM387909	1	2.40278	3.58362	3.59712	3.0864	3.52392	2.99076	2.89977	3.70466	2.84675	3.16131	2.7669	1.56913	High
GSM387912	0	1.425	3.50469	2.59774	3.58861	3.87879	3.02416	2.93494	3.50914	1.43478	3.58553	2.44093	0.551759	Low
GSM387915	0	13.1528	3.33501	2.97147	3.49062	3.59892	3.1142	2.91343	3.50349	2.45109	3.27848	2.53779	1.00068	Low
GSM387918	0	12.9194	3.38038	2.57221	3.77017	3.73503	2.97592	2.91318	3.56021	1.77631	3.65626	2.32667	0.325928	Low
GSM387924	0	0.402778	3.46431	2.8866	3.49476	3.58261	3.19782	3.08557	3.4058	1.55038	3.47421	2.57245	0.998615	Low
GSM387925	1	10.3028	3.42884	3.24826	3.57366	3.58224	3.00823	3.11421	3.52205	1.51252	3.42638	2.71178	1.55589	High
GSM387926	0	0.269444	3.36084	2.67754	3.37093	3.69448	3.28778	2.5443	3.17104	1.06461	3.41943	2.2019	1.87023	High
GSM387927	1	3.28333	3.33154	2.45269	3.55856	3.63848	3.56378	1.92497	3.34742	1.31094	3.15403	2.48054	0.359625	Low
GSM387929	1	0.961111	3.56125	3.18091	2.5757	3.52773	3.21783	2.84875	3.28447	2.91709	3.05109	2.65149	5.98449	High
GSM387931	0	12.4083	3.4913	3.22787	2.41533	3.43248	2.98558	3.35759	3.63656	1.48284	2.7023	2.63602	1.15969	High
GSM387933	0	1.08333	3.45261	2.86876	3.46184	3.63251	3.11254	2.83386	3.42412	2.78631	3.55247	2.59417	1.37269	High
GSM387934	0	11.8139	3.42386	2.69394	3.68208	3.62669	3.06905	2.82916	3.41905	1.60897	3.50025	2.72771	0.843736	Low
GSM387938	1	0.533333	3.28278	2.70698	3.59395	3.6728	2.90936	3.00817	3.485	1.37553	3.29172	2.52405	0.788017	Low
GSM387939	0	12.1778	3.242	2.40789	3.53414	3.6576	2.95549	2.75884	3.46119	1.52585	3.46854	2.14976	0.383416	Low
GSM387940	1	0.2725	3.25373	3.33982	3.14317	3.35482	2.8943	2.88661	3.49912	1.3912	2.92821	2.43353	1.73689	High
GSM387942	0	0.0277778	3.33543	3.22764	3.02672	3.46433	3.18059	2.88785	3.45738	1.31646	3.02898	2.69012	2.07227	High
GSM387943	0	0.580556	3.35973	3.35919	3.06825	3.35576	3.16691	2.51784	3.49635	2.93123	2.9377	2.15725	1.13498	High
GSM387946	1	1.21667	3.28884	3.05914	3.44394	3.5549	3.15826	3.05633	3.50972	1.78668	3.05933	2.53425	0.944152	Low
GSM387950	1	1.05278	3.44787	3.55838	2.55284	3.43152	3.18096	3.04363	3.63271	3.00571	2.98016	2.70918	2.5967	High
GSM387955	1	1.08056	3.62707	2.90518	3.2997	3.72823	3.08467	2.78598	3.50702	2.85666	3.27506	2.47053	0.823774	Low
GSM387956	0	1.07222	3.29944	2.86848	3.33773	3.72428	2.92502	3.14536	3.55541	1.67048	3.46946	2.69252	1.40419	High
GSM387957	1	1.27222	3.35848	2.71068	3.23789	3.54922	2.97394	2.69952	3.44348	2.69075	3.26665	2.26897	0.78975	Low
GSM387958	0	6.725	3.24563	1.98213	3.27605	3.64259	2.91676	2.03944	3.34683	1.74261	3.16702	2.29664	0.36999	Low
GSM387967	0	11.5306	3.29904	2.82835	3.1729	3.49953	2.99599	3.50948	3.55783	3.01977	3.20173	2.72872	1.00909	High
GSM387978	1	3.33056	3.4481	3.32244	2.77504	3.41124	3.23768	2.87575	3.52187	1.51343	2.90209	2.47544	1.26851	High
GSM387979	1	0.552778	3.34783	3.11622	3.30633	3.61201	2.75227	2.86596	3.4971	1.77235	3.36256	2.40685	1.9696	High
GSM387980	1	0.363889	3.53905	3.27947	2.93725	3.598	2.98663	2.72094	3.3883	2.7176	3.35012	2.58297	4.90047	High
GSM387982	0	6.29444	3.31972	2.79294	3.30915	3.59628	2.77552	2.65232	3.55107	2.97691	3.30389	2.40614	0.894463	Low
GSM387983	1	4.74167	3.53609	3.23123	3.28998	3.52095	2.97762	2.81164	3.36641	2.78028	3.23304	2.71211	3.41448	High
