# Supplementary material for: Identification of subtype-specific genes signature by WGCNA for prognostic prediction in diffuse type gastric cancer
Source: Aging (Albany NY). 2020 Sep 11;12(17):17418–35. doi: 10.18632/aging.103743 (PMC7521533; doi:10.18632/aging.103743)
Supplement: Supplementary Table 3 [file aging-12-103743-s004..xlsx]

## Sheet: 10genes_survival
Supplementary Table 3. The survival, 10 genes expression and risk score for GSE62254 samples.
id	status	OS	CAST	FRZB	GMDS	RALA	RFX5	SELP	SRSF5	DDX3Y	SLC9A3R1	LEF1	risk_score	risk_level
GSM1523729	0	7.3525	2.38703	1.60465	2.68473	3.17099	2.29895	2.02831	2.46504	0.997868	2.43159	1.64208	0.894715	Low
GSM1523744	0	8.80833	2.28015	1.39824	2.42413	3.19449	2.52391	1.42233	2.44998	1.50425	2.33442	1.43395	0.899086	Low
GSM1523745	0	8.79417	2.15316	1.51194	2.04999	3.16779	2.53266	1.66827	2.41962	1.6322	2.18856	1.6275	1.73747	High
GSM1523748	0	8.74417	2.31944	1.5177	2.62641	3.11349	2.45348	1.9764	2.54498	0.998601	2.36631	1.57697	0.647545	Low
GSM1523765	1	1.18333	2.41338	1.41262	2.18917	3.19163	2.49873	1.67697	2.66002	1.01127	2.22745	1.51873	0.669029	Low
GSM1523769	1	1.14417	2.46318	1.71034	2.41223	3.21997	2.37814	2.2325	2.48143	0.975378	2.39637	1.67121	1.0143	High
GSM1523771	1	1.05583	2.37988	2.06651	1.91301	2.99294	2.50572	2.29929	2.49955	1.07856	2.15916	1.76822	2.78958	High
GSM1523772	1	0.835833	2.31211	2.00474	2.43915	3.02825	2.39194	2.01067	2.52305	0.972247	2.23809	1.77357	3.10201	High
GSM1523773	1	0.360833	2.29446	2.09087	2.4703	2.81266	2.48016	2.26911	2.58925	0.967404	2.08879	1.62001	1.50493	High
GSM1523775	0	8.13333	2.31013	1.30257	2.43471	3.28448	2.24433	1.59723	2.47525	0.968528	2.33777	1.46206	0.690176	Low
GSM1523776	0	8.1225	2.33651	1.50679	2.64719	2.84646	2.61494	1.79189	2.40843	1.83892	2.31705	1.54372	0.51065	Low
GSM1523778	0	7.71917	2.5245	1.60591	2.58795	3.18323	2.43741	2.34367	2.51028	1.01085	2.07571	1.59784	0.50976	Low
GSM1523779	0	7.71667	2.33195	1.42285	2.62327	3.13931	2.36183	1.80927	2.43848	0.996246	2.38293	1.48856	0.620354	Low
GSM1523783	0	7.66083	2.46058	1.48367	2.7172	3.15254	2.3712	2.08764	2.5621	0.970536	2.57522	1.61678	0.442064	Low
GSM1523784	0	7.60833	2.32543	1.50452	2.74609	3.03038	2.35624	2.35346	2.49732	0.967762	2.17242	1.62849	0.430535	Low
GSM1523786	1	2.3725	2.35851	1.74633	2.71456	3.03391	2.43223	2.00863	2.48359	0.954774	2.32874	1.71006	1.40132	High
GSM1523788	1	0.689167	2.27366	2.05706	2.39462	3.01864	2.48885	2.38983	2.58679	0.929783	2.00307	1.84589	2.61415	High
GSM1523789	1	0.983333	2.30552	1.59178	2.62984	3.0318	2.51442	1.849	2.48397	1.58394	2.26648	1.72052	1.02744	High
GSM1523793	0	6.7275	2.33682	1.53101	2.31318	2.98797	2.39855	1.78745	2.48261	0.949731	2.53228	1.53234	0.852698	Low
GSM1523794	1	2.25	2.42745	1.47376	1.92446	3.24795	2.68712	1.53235	2.4069	2.01998	2.17067	1.5643	1.27839	High
GSM1523798	1	5.1525	2.30062	1.78496	2.3444	2.9498	2.59135	2.34069	2.47473	1.8913	2.30847	1.76725	0.878649	Low
GSM1523804	0	6.39167	2.37257	1.60188	2.66535	3.12263	2.34084	2.18062	2.43588	0.966	2.3198	1.66169	0.824437	Low
GSM1523808	0	6.125	2.49025	1.80401	2.59286	3.1714	2.36843	2.07277	2.50193	1.9267	2.37557	1.70121	0.893148	Low
GSM1523812	0	6.06917	2.30649	1.74921	2.47769	3.07022	2.60678	2.28737	2.46611	1.74623	2.26178	1.64	0.754635	Low
GSM1523813	0	6.06917	2.34118	1.88392	2.24295	3.13568	2.39403	1.72599	2.43406	1.94824	2.224	1.67273	2.49857	High
GSM1523817	1	0.519167	1.96443	1.38902	1.44555	2.80206	3.37065	1.46627	2.46406	1.3305	1.88855	1.51842	2.23871	High
GSM1523818	1	0.819167	2.24728	1.51003	2.75935	3.05962	2.654	1.61165	2.39163	1.01389	2.46698	1.57074	1.35433	High
GSM1523827	0	5.83583	2.30061	1.74348	2.59995	3.00344	2.46172	2.02608	2.50936	0.965402	2.18882	1.75743	1.61857	High
GSM1523831	1	2.575	2.14649	1.45861	2.32812	2.9211	2.45411	1.65463	2.42261	1.77967	2.15939	2.03073	2.32315	High
GSM1523833	1	0.739167	2.3172	1.48267	2.90049	3.14086	2.4116	1.73629	2.5065	1.87773	2.36516	1.43343	0.392532	Low
GSM1523834	1	3.71417	2.30248	1.8133	2.46518	3.07788	2.39162	2.04034	2.50121	0.900471	2.21471	1.75495	2.15051	High
GSM1523839	0	5.76083	2.24891	1.68323	2.45078	3.25404	2.45588	2.20302	2.40029	1.78248	2.09815	1.5022	0.749892	Low
GSM1523840	1	1.9025	2.03041	1.33797	2.27565	3.02406	2.40555	1.61445	2.38088	1.9169	2.12692	1.74885	1.35544	High
GSM1523842	1	4.06083	2.25121	1.49626	2.25148	3.08675	2.31821	2.14012	2.46222	1.69382	2.37628	1.61817	0.531909	Low
GSM1523843	1	2.15583	2.27494	1.681	2.67635	3.00013	2.38247	2.39747	2.32889	0.934428	2.37131	1.65059	0.89874	Low
GSM1523845	1	0.805833	2.37543	1.52003	2.28956	3.03956	2.5304	1.57747	2.3775	0.952361	2.61883	1.58764	1.56302	High
GSM1523846	0	5.6975	2.23798	1.94508	2.57115	2.88786	2.51604	2.12296	2.47333	1.81567	2.14324	1.67671	1.33505	High
GSM1523848	0	5.6775	2.24488	1.78735	2.20142	3.00742	2.634	2.24868	2.49168	1.91751	2.20942	1.72852	1.08656	High
GSM1523850	1	3.03333	2.28253	2.12717	2.49132	3.02179	2.3509	2.07577	2.54556	1.81761	2.29893	1.62991	1.72298	High
GSM1523854	0	5.56083	2.25382	1.49462	2.39831	3.19689	2.4945	1.90256	2.35648	1.66857	2.45308	1.71097	1.12355	High
GSM1523856	0	5.51667	2.43607	1.18003	1.98666	3.18948	2.07071	1.72129	2.39407	0.988818	2.10779	1.62998	0.666611	Low
GSM1523858	1	1.425	2.3394	2.38753	1.84532	2.7791	2.38861	2.47056	2.59969	0.976941	1.75933	1.60816	2.63887	High
GSM1523862	1	1.75	2.31602	2.29005	2.47421	2.88035	2.42734	2.27815	2.53621	2.00606	2.32426	1.59409	1.3721	High
GSM1523869	0	5.21083	2.34037	1.56552	2.26332	2.96541	2.4478	1.74297	2.48418	0.942424	2.28117	1.60315	1.24286	High
GSM1523872	1	1.2525	2.32269	1.63991	2.65689	3.16328	2.40688	1.68926	2.42498	0.952395	2.42221	1.71693	2.2421	High
GSM1523873	1	2.0025	2.19822	1.44957	2.49414	2.99633	2.61653	1.79986	2.4282	1.69459	2.36281	1.61802	0.747226	Low
GSM1523880	0	5.08083	2.32282	1.33699	2.71334	3.11586	2.59436	1.82909	2.44984	1.01445	2.36462	1.71613	0.770645	Low
GSM1523882	0	5.05833	2.27311	1.30662	2.55887	3.03369	2.86572	1.73086	2.37676	1.55293	2.4234	1.45768	0.433754	Low
GSM1523883	1	3.29417	2.35896	1.40083	2.65015	3.09771	2.67598	1.69416	2.41083	1.50946	2.33232	1.51159	0.589697	Low
GSM1523884	0	5.03583	2.30341	1.70972	2.575	3.09787	2.5037	2.58132	2.46727	1.96843	2.30722	1.64931	0.435746	Low
GSM1523885	0	5.01917	2.36161	1.18526	2.50073	3.04032	2.80011	1.64242	2.37743	1.05695	2.16306	1.4775	0.460931	Low
GSM1523886	1	0.466667	2.34127	1.79454	2.31431	3.09933	2.37798	2.19405	2.43045	2.05545	2.2871	1.67422	0.960253	High
GSM1523887	0	5.01667	2.2357	1.25481	2.23622	2.92033	2.57004	1.71172	2.50164	1.79829	2.03349	1.56866	0.41345	Low
GSM1523890	0	4.96417	2.20553	1.5468	2.66471	3.02206	2.413	1.80029	2.40142	1.01699	2.42688	1.57922	1.13737	High
GSM1523905	0	4.60833	2.31589	1.53301	2.56597	2.91254	2.52258	2.40286	2.43425	1.5855	2.31676	1.58385	0.313187	Low
GSM1523906	0	4.60833	2.22251	1.81064	2.28915	3.01299	2.46405	2.15567	2.43153	1.76944	2.35836	1.71624	1.36253	High
GSM1523908	0	4.58917	2.35665	1.56017	2.45894	3.0371	2.4985	1.69506	2.31622	0.976051	2.37251	1.55178	1.45524	High
GSM1523909	0	4.54417	2.16777	1.20544	2.17966	3.09004	2.32693	1.84449	2.47828	1.9263	2.12762	1.48123	0.289956	Low
GSM1523910	0	4.5275	2.55503	1.5076	2.62023	2.94705	2.52818	1.66743	2.37703	1.88248	2.15442	1.49961	0.518389	Low
GSM1523918	1	2.34417	2.31197	1.75304	2.2801	2.83408	2.43647	1.86835	2.53682	1.79753	2.07665	1.66347	1.0766	High
GSM1523921	0	6.94167	2.20536	1.42168	1.39208	3.13451	2.61824	1.63626	2.45255	1.564	2.42483	1.64012	1.79346	High
GSM1523923	1	2.2	2.38944	1.52555	2.571	3.24414	2.24612	1.67165	2.40437	1.60779	2.26459	1.60709	1.07116	High
GSM1523924	0	6.85	2.37815	1.68049	2.60856	3.13913	2.34602	2.00908	2.42813	1.70602	2.29453	1.63811	0.874081	Low
GSM1523925	1	0.525	2.19963	1.427	1.88508	3.09654	2.46836	1.97819	2.48025	0.953974	2.40219	1.53766	0.832315	Low
GSM1523927	0	6.73083	2.43093	1.5558	2.51479	3.07853	2.44484	2.08692	2.48506	1.81879	2.35944	1.69382	0.532315	Low
GSM1523931	0	6.46667	2.25643	1.48054	2.55772	2.96519	2.52402	2.08954	2.43431	1.06217	2.37932	1.68815	0.727815	Low
GSM1523933	0	6.2725	2.09724	1.2287	2.35734	3.0957	2.30747	1.67577	2.19017	1.92009	2.57589	1.49198	0.603411	Low
GSM1523935	0	7.28333	2.20655	1.67353	1.97097	3.10622	2.34119	2.38337	2.43596	1.77887	1.97661	1.70703	1.00272	High
GSM1523936	1	1.46417	2.37925	1.74942	2.76753	3.03522	2.47754	2.13586	2.49029	1.78877	2.26063	1.68619	0.743149	Low
GSM1523938	1	0.480833	2.17425	2.1669	1.96184	2.82106	2.35663	2.41515	2.36565	0.881877	2.16104	1.75917	4.16306	High
GSM1523939	1	0.935833	2.23241	2.14846	2.14519	2.73657	2.33015	2.57418	2.36657	0.944433	2.17622	1.69407	2.19385	High
GSM1523941	1	0.3775	2.31191	1.65666	2.24524	3.12016	2.41868	1.91383	2.45509	1.62836	2.24671	1.62037	1.13183	High
GSM1523943	1	0.460833	2.31325	1.5485	2.58958	3.10009	2.412	1.65144	2.35667	1.00293	2.32672	1.59058	1.58841	High
GSM1523944	0	5.8025	2.33592	1.28285	2.18506	3.13578	2.58311	1.72336	2.3537	1.58679	2.28396	1.49577	0.540958	Low
GSM1523945	1	1.46083	2.2861	2.06976	2.5327	3.11953	2.37755	2.18852	2.41992	1.83353	2.05498	1.66379	1.98891	High
GSM1523948	1	2.28917	2.15847	2.14474	2.14706	2.91663	2.47018	1.93066	2.46986	1.86093	2.45037	1.6497	3.0242	High
GSM1523949	1	0.841667	2.24701	2.16535	2.24246	2.84587	2.21674	2.3054	2.41593	0.902361	2.10071	1.69202	3.05554	High
GSM1523951	1	4.41917	2.18773	1.71006	2.33286	2.91645	2.42401	1.79255	2.34663	1.73008	2.1962	1.71526	2.01411	High
GSM1523952	0	8.40583	2.3117	1.54325	2.69115	3.25951	2.34078	2.27895	2.50377	0.998118	2.2826	1.59254	0.574765	Low
GSM1523953	0	7.06417	2.09328	1.32976	2.20892	3.13587	2.37976	1.71932	2.46594	1.82766	2.19506	1.48468	0.586773	Low
GSM1523954	0	8.40583	2.56729	1.29115	2.76705	3.22615	2.30808	1.71865	2.49813	1.67433	2.79895	1.46335	0.218842	Low
GSM1523958	0	8.3525	2.41144	1.58285	2.55889	3.1097	2.48957	2.0085	2.59605	1.80834	2.25145	1.62587	0.490116	Low
GSM1523962	1	1.6775	2.36797	2.24783	2.25981	2.97112	2.36526	2.25254	2.598	1.94564	2.33869	1.64581	1.49863	High
GSM1523965	1	0.955833	2.26731	1.83761	1.48572	3.24987	2.29162	1.98128	2.45062	1.83881	2.12272	1.53944	2.09527	High
GSM1523966	1	4.31667	2.143	1.49995	2.36733	3.06246	2.54883	1.80599	2.52032	1.57935	2.19863	1.56234	0.826774	Low
GSM1523967	0	8.20583	2.22929	1.49534	2.61712	3.08845	2.42393	1.98228	2.61685	1.84877	2.27222	1.77076	0.612849	Low
GSM1523968	1	3.76417	2.31412	2.17557	2.27058	2.76192	2.42898	2.10352	2.53227	0.995168	2.26366	1.67047	2.54409	High
GSM1523969	1	1.49167	2.44125	1.87983	2.56271	2.96446	2.3736	1.92143	2.57444	1.80918	2.61716	1.69553	1.00194	High
GSM1523971	1	1.10833	2.23425	1.99193	2.26454	2.71447	2.33658	2.2417	2.60983	0.988681	2.25553	1.64179	1.2609	High
GSM1523973	0	7.2725	2.20022	1.53781	2.33525	2.93725	2.59529	2.20596	2.49458	1.56748	2.39786	1.6223	0.512541	Low
GSM1523975	1	0.6	2.30836	1.82544	2.35533	2.91314	2.5015	2.13589	2.42137	1.81813	2.23912	1.85761	1.60489	High
GSM1523977	1	0.0833333	2.01789	1.2503	2.16528	3.05191	2.38817	1.81418	2.47833	1.54701	2.54453	1.392	0.346823	Low
GSM1523978	1	1.3525	2.30936	1.39972	2.20852	3.20128	2.41674	1.48533	2.32445	0.934155	2.35057	1.56783	1.89252	High
GSM1523980	1	0.558333	2.44636	1.70165	2.41042	3.10667	2.44222	1.96677	2.49278	0.963252	2.35858	1.76047	1.58481	High
GSM1523981	0	8.1	2.31676	1.53769	2.17313	3.15445	2.4299	2.6489	2.59959	1.92211	2.06046	1.69749	0.313876	Low
GSM1523982	1	0.725	2.25763	1.44292	1.98008	3.00816	2.40476	2.07276	2.54525	1.89736	1.97932	1.79828	0.704864	Low
GSM1523983	1	0.841667	2.43033	1.36851	2.68063	2.99169	2.53169	1.59993	2.449	1.88782	2.15234	1.49506	0.40978	Low
GSM1523984	0	8.08083	1.94324	1.34122	1.69939	3.10252	2.41304	1.50924	2.63046	2.09487	1.97423	1.61665	1.25273	High
GSM1523986	0	7.23333	2.44613	1.54796	2.63178	3.09892	2.45756	1.84318	2.38318	1.82111	2.50027	1.66265	0.74823	Low
GSM1523987	1	1.5225	2.29673	1.61117	2.6771	3.12576	2.34411	1.872	2.52888	1.04794	2.32535	1.70272	1.24359	High
GSM1523988	1	1.23583	2.30496	2.16243	1.70169	2.73019	2.60762	2.49124	2.5704	1.93612	1.94899	1.77993	1.70761	High
GSM1523990	1	1.18083	2.25464	1.35119	1.61303	3.07018	2.31167	1.56812	2.34416	1.92023	2.22288	1.66681	1.42183	High
GSM1523992	1	1.6775	2.27405	1.49078	2.75015	2.97706	2.3498	2.06412	2.37108	0.960766	2.57878	1.57884	0.608049	Low
GSM1523996	1	2.93333	2.3735	1.54472	2.66181	3.10716	2.30102	2.24019	2.57045	1.03239	2.27474	1.61638	0.462024	Low
GSM1523997	1	2.1	2.30447	1.36017	2.41527	2.93259	2.31243	1.82522	2.36508	0.995769	2.21499	1.5604	0.65768	Low
GSM1524000	0	7.8225	2.23219	1.59495	2.51766	3.03994	2.42835	2.19758	2.58119	0.965082	2.26984	1.69484	0.800703	Low
GSM1524004	1	0.494167	2.27199	1.50927	2.69172	3.16532	2.40141	1.90772	2.54801	1.78888	2.35616	1.50825	0.439186	Low
GSM1524006	1	2.18917	2.29823	2.28816	2.09702	2.76704	2.42558	2.46959	2.52526	0.930625	2.11586	1.70279	2.59654	High
GSM1524007	1	0.864167	2.20278	1.61291	2.22124	3.22298	2.49898	1.8144	2.43995	1.02248	2.33235	1.67295	2.24735	High
GSM1524008	1	0.9025	2.24907	1.52289	2.63689	3.10087	2.35133	1.64339	2.46758	1.74713	2.51173	1.45072	0.642912	Low
GSM1524009	1	5.41667	2.35552	1.80387	2.68067	3.10998	2.38347	2.44013	2.55185	1.02796	2.40398	1.75603	0.927061	Low
GSM1524010	1	1.64167	2.31797	2.2298	2.28927	2.85382	2.4085	1.98977	2.59075	1.03518	2.38294	1.67011	3.05991	High
GSM1524012	0	7.1025	2.24417	1.10526	2.21072	2.98286	2.44424	1.58951	2.35296	1.54434	2.31338	1.47288	0.357258	Low
GSM1524016	1	2.31667	2.30385	1.44118	2.7071	3.13532	2.33465	1.7495	2.49489	1.83457	2.25348	1.5912	0.5651	Low
GSM1524019	1	0.694167	2.20578	1.90396	2.27319	3.05997	2.44876	1.67377	2.42439	1.72418	2.20152	1.61445	3.02584	High
GSM1524021	1	1.0775	2.28984	1.71597	2.2675	3.02113	2.4132	1.74824	2.47246	1.02783	2.27733	1.64308	2.07132	High
GSM1524022	1	0.669167	2.30743	1.80366	2.35959	3.04679	2.39585	2.17234	2.46359	0.944571	2.16795	1.75571	1.88139	High
GSM1524024	1	7.4525	2.36298	1.59953	2.54154	3.07414	2.38959	1.86614	2.38832	1.7146	2.33798	1.59594	0.839128	Low
GSM1524025	1	6.81917	2.39814	1.39706	1.87804	3.04404	2.52678	1.66693	2.51778	1.61589	2.26135	1.49457	0.594643	Low
GSM1524026	0	6.96667	2.21977	1.72909	2.47895	2.85173	2.46721	2.47096	2.49994	0.913166	2.09966	1.75923	0.965161	High
GSM1524027	1	4.975	2.20042	1.48936	2.5959	2.98918	2.51121	2.07882	2.48976	1.65912	2.27227	1.62909	0.503903	Low
GSM1524029	1	2.59167	2.12664	2.22309	1.98396	2.5028	2.23805	2.05434	2.54071	0.941027	2.24208	1.64608	3.0513	High
GSM1524030	1	2.61083	2.26499	2.38189	1.8861	2.65222	2.37206	2.30374	2.49579	0.96694	2.09006	1.64644	3.52572	High
GSM1524038	1	0.719167	2.24518	1.42961	2.85176	3.10769	2.48808	1.55645	2.42992	1.70853	2.48531	1.65696	0.957915	High
GSM1524039	1	1.00583	2.27826	1.37742	2.2552	3.12275	2.34155	2.42227	2.43606	1.94629	2.00374	1.67424	0.324718	Low
GSM1524040	1	3.01417	2.18495	1.45759	2.23559	2.98164	2.49087	1.86087	2.39059	0.988609	2.43451	1.53135	0.923929	Low
GSM1524042	1	0.9025	2.21139	1.55489	2.11147	3.16664	2.34302	1.80797	2.42291	0.936512	2.22694	1.64995	1.99781	High
GSM1524043	1	1.4025	2.28771	1.81869	2.63376	3.14899	2.82674	1.47406	2.47242	1.63177	2.15473	1.59396	2.8965	High
GSM1524046	0	7.33583	2.28165	1.79955	2.67932	3.07325	2.37845	2.53355	2.5056	0.963352	2.45949	1.68011	0.813672	Low
GSM1524047	0	5.8225	2.29371	1.44718	2.61048	3.04084	2.43916	1.76353	2.46686	1.62157	2.62425	1.67913	0.700048	Low
GSM1524051	0	7.2725	2.45438	1.42114	2.51621	3.06346	2.59382	1.71198	2.56901	0.90589	2.42478	1.62642	0.727074	Low
GSM1524052	1	1.0975	2.27089	1.72045	1.99988	2.77581	2.42417	2.06599	2.37829	1.6012	2.27548	1.60261	1.00174	High
GSM1524059	0	7.1	2.2669	1.48896	2.11891	2.95839	2.45745	2.89476	2.51993	1.80828	2.06031	1.7174	0.241165	Low
GSM1524062	1	5.85	2.29557	2.41949	2.34557	2.71271	2.33614	1.99032	2.4737	0.969333	2.06645	1.5281	3.75439	High
GSM1524072	1	3.5775	2.17156	1.56124	2.63549	3.05125	2.29979	2.19454	2.40169	0.964245	2.44579	1.56753	0.728163	Low
