# Supplementary material for: Identification of subtype-specific genes signature by WGCNA for prognostic prediction in diffuse type gastric cancer
Source: Aging (Albany NY). 2020 Sep 11;12(17):17418–35. doi: 10.18632/aging.103743 (PMC7521533; doi:10.18632/aging.103743)
Supplement: Supplementary Table 4 [file aging-12-103743-s005..xlsx]

## Sheet: RALA
Supplementary Table 4. All 10 genes related pathway enrichment.
HIGH																LOW
NAME	GS<br> follow link to MSigDB	GS DETAILS	SIZE	ES	NES	NOM p-val	FDR q-val	FWER p-val	RANK AT MAX	LEADING EDGE						NAME	GS<br> follow link to MSigDB	GS DETAILS	SIZE	ES	NES	NOM p-val	FDR q-val	FWER p-val	RANK AT MAX	LEADING EDGE
KEGG_PROTEASOME	KEGG_PROTEASOME	Details ...	44	0.743002	1.84685	0.003861	0.379604	0.184	4359	tags=89%, list=22%, signal=114%						KEGG_CALCIUM_SIGNALING_PATHWAY	KEGG_CALCIUM_SIGNALING_PATHWAY	Details ...	177	-0.509166	-1.88794	0	0.244787	0.112	3820	tags=47%, list=20%, signal=58%
KEGG_CELL_CYCLE	KEGG_CELL_CYCLE	Details ...	124	0.565121	1.84348	0.00580271	0.195752	0.188	4143	tags=60%, list=21%, signal=75%						KEGG_NEUROACTIVE_LIGAND_RECEPTOR_INTERACTION	KEGG_NEUROACTIVE_LIGAND_RECEPTOR_INTERACTION	Details ...	271	-0.468061	-1.68846	0.0103306	0.789392	0.5	4962	tags=44%, list=25%, signal=59%
KEGG_RNA_DEGRADATION	KEGG_RNA_DEGRADATION	Details ...	57	0.602067	1.79788	0.0138067	0.207216	0.268	3413	tags=49%, list=17%, signal=59%						KEGG_VASCULAR_SMOOTH_MUSCLE_CONTRACTION	KEGG_VASCULAR_SMOOTH_MUSCLE_CONTRACTION	Details ...	115	-0.481016	-1.67812	0.0157791	0.567029	0.521	3954	tags=46%, list=20%, signal=57%
KEGG_BASE_EXCISION_REPAIR	KEGG_BASE_EXCISION_REPAIR	Details ...	33	0.621631	1.73289	0.0038835	0.276838	0.413	4420	tags=61%, list=23%, signal=78%						KEGG_CELL_ADHESION_MOLECULES_CAMS	KEGG_CELL_ADHESION_MOLECULES_CAMS	Details ...	130	-0.462886	-1.63303	0.0488798	0.593371	0.63	4113	tags=48%, list=21%, signal=60%
KEGG_SPLICEOSOME	KEGG_SPLICEOSOME	Details ...	126	0.571483	1.66951	0.0342742	0.378368	0.561	5373	tags=65%, list=28%, signal=89%						KEGG_HEMATOPOIETIC_CELL_LINEAGE	KEGG_HEMATOPOIETIC_CELL_LINEAGE	Details ...	84	-0.518983	-1.61996	0.0536779	0.51967	0.652	4251	tags=57%, list=22%, signal=73%
KEGG_P53_SIGNALING_PATHWAY	KEGG_P53_SIGNALING_PATHWAY	Details ...	68	0.491151	1.66102	0.00998004	0.336894	0.586	3996	tags=51%, list=20%, signal=65%						KEGG_GLYCOSPHINGOLIPID_BIOSYNTHESIS_GANGLIO_SERIES	KEGG_GLYCOSPHINGOLIPID_BIOSYNTHESIS_GANGLIO_SERIES	Details ...	15	-0.554716	-1.55182	0.0466926	0.688692	0.806	1685	tags=33%, list=9%, signal=36%
KEGG_AMINOACYL_TRNA_BIOSYNTHESIS	KEGG_AMINOACYL_TRNA_BIOSYNTHESIS	Details ...	22	0.68996	1.6309	0.0142566	0.362901	0.648	5231	tags=77%, list=27%, signal=105%						KEGG_DILATED_CARDIOMYOPATHY	KEGG_DILATED_CARDIOMYOPATHY	Details ...	90	-0.45197	-1.52057	0.0552268	0.699042	0.844	3839	tags=44%, list=20%, signal=55%
KEGG_PYRIMIDINE_METABOLISM	KEGG_PYRIMIDINE_METABOLISM	Details ...	98	0.481969	1.63039	0.0237154	0.318821	0.649	3963	tags=47%, list=20%, signal=59%						KEGG_INTESTINAL_IMMUNE_NETWORK_FOR_IGA_PRODUCTION	KEGG_INTESTINAL_IMMUNE_NETWORK_FOR_IGA_PRODUCTION	Details ...	46	-0.597573	-1.51429	0.133733	0.632864	0.851	4999	tags=65%, list=26%, signal=87%
KEGG_ONE_CARBON_POOL_BY_FOLATE	KEGG_ONE_CARBON_POOL_BY_FOLATE	Details ...	17	0.599228	1.61275	0.0278884	0.319262	0.679	2034	tags=53%, list=10%, signal=59%						KEGG_GLYCOSAMINOGLYCAN_BIOSYNTHESIS_CHONDROITIN_SULFATE	KEGG_GLYCOSAMINOGLYCAN_BIOSYNTHESIS_CHONDROITIN_SULFATE	Details ...	22	-0.550305	-1.49694	0.0825147	0.623623	0.878	5023	tags=59%, list=26%, signal=79%
KEGG_DNA_REPLICATION	KEGG_DNA_REPLICATION	Details ...	36	0.687942	1.60854	0.0541082	0.295956	0.69	3563	tags=61%, list=18%, signal=75%						KEGG_CHEMOKINE_SIGNALING_PATHWAY	KEGG_CHEMOKINE_SIGNALING_PATHWAY	Details ...	187	-0.390243	-1.46566	0.0971074	0.662739	0.911	3507	tags=35%, list=18%, signal=42%
KEGG_HOMOLOGOUS_RECOMBINATION	KEGG_HOMOLOGOUS_RECOMBINATION	Details ...	28	0.585974	1.59063	0.0656064	0.301537	0.718	3304	tags=46%, list=17%, signal=56%						KEGG_BASAL_CELL_CARCINOMA	KEGG_BASAL_CELL_CARCINOMA	Details ...	55	-0.421104	-1.45829	0.0757576	0.62497	0.919	2884	tags=36%, list=15%, signal=43%
KEGG_MISMATCH_REPAIR	KEGG_MISMATCH_REPAIR	Details ...	23	0.661645	1.58942	0.0577689	0.278115	0.719	2009	tags=43%, list=10%, signal=48%						KEGG_ASTHMA	KEGG_ASTHMA	Details ...	28	-0.609929	-1.45433	0.161355	0.583957	0.923	5958	tags=75%, list=31%, signal=108%
KEGG_STEROID_BIOSYNTHESIS	KEGG_STEROID_BIOSYNTHESIS	Details ...	17	0.732383	1.58361	0.0557769	0.265712	0.728	3709	tags=71%, list=19%, signal=87%						KEGG_MELANOGENESIS	KEGG_MELANOGENESIS	Details ...	101	-0.378521	-1.45235	0.0371901	0.543707	0.925	3749	tags=37%, list=19%, signal=45%
KEGG_N_GLYCAN_BIOSYNTHESIS	KEGG_N_GLYCAN_BIOSYNTHESIS	Details ...	46	0.531723	1.55838	0.068	0.289519	0.766	3809	tags=52%, list=20%, signal=65%						KEGG_LEUKOCYTE_TRANSENDOTHELIAL_MIGRATION	KEGG_LEUKOCYTE_TRANSENDOTHELIAL_MIGRATION	Details ...	115	-0.353859	-1.43579	0.054326	0.548514	0.932	3481	tags=37%, list=18%, signal=45%
KEGG_PENTOSE_PHOSPHATE_PATHWAY	KEGG_PENTOSE_PHOSPHATE_PATHWAY	Details ...	27	0.526437	1.52509	0.0575816	0.330615	0.824	5005	tags=59%, list=26%, signal=80%						KEGG_HYPERTROPHIC_CARDIOMYOPATHY_HCM	KEGG_HYPERTROPHIC_CARDIOMYOPATHY_HCM	Details ...	83	-0.425493	-1.43349	0.0981964	0.517949	0.934	3839	tags=42%, list=20%, signal=52%
KEGG_GLYOXYLATE_AND_DICARBOXYLATE_METABOLISM	KEGG_GLYOXYLATE_AND_DICARBOXYLATE_METABOLISM	Details ...	16	0.585617	1.47798	0.0752475	0.406324	0.885	4779	tags=63%, list=25%, signal=83%						KEGG_ECM_RECEPTOR_INTERACTION	KEGG_ECM_RECEPTOR_INTERACTION	Details ...	83	-0.437434	-1.4168	0.108871	0.52504	0.945	4460	tags=49%, list=23%, signal=64%
KEGG_CITRATE_CYCLE_TCA_CYCLE	KEGG_CITRATE_CYCLE_TCA_CYCLE	Details ...	30	0.596133	1.46373	0.135628	0.414686	0.901	4417	tags=57%, list=23%, signal=73%						KEGG_HEDGEHOG_SIGNALING_PATHWAY	KEGG_HEDGEHOG_SIGNALING_PATHWAY	Details ...	56	-0.405099	-1.39367	0.0865801	0.552332	0.958	2354	tags=29%, list=12%, signal=32%
KEGG_SELENOAMINO_ACID_METABOLISM	KEGG_SELENOAMINO_ACID_METABOLISM	Details ...	25	0.473919	1.45004	0.0535373	0.4223	0.912	5869	tags=64%, list=30%, signal=91%						KEGG_TASTE_TRANSDUCTION	KEGG_TASTE_TRANSDUCTION	Details ...	51	-0.423021	-1.34002	0.152542	0.662113	0.976	6708	tags=61%, list=34%, signal=92%
KEGG_AMINO_SUGAR_AND_NUCLEOTIDE_SUGAR_METABOLISM	KEGG_AMINO_SUGAR_AND_NUCLEOTIDE_SUGAR_METABOLISM	Details ...	44	0.454608	1.44224	0.100971	0.416019	0.917	4149	tags=48%, list=21%, signal=60%						KEGG_ADIPOCYTOKINE_SIGNALING_PATHWAY	KEGG_ADIPOCYTOKINE_SIGNALING_PATHWAY	Details ...	67	-0.358607	-1.3336	0.128257	0.644446	0.978	4564	tags=33%, list=23%, signal=43%
KEGG_NUCLEOTIDE_EXCISION_REPAIR	KEGG_NUCLEOTIDE_EXCISION_REPAIR	Details ...	44	0.490464	1.42316	0.131737	0.437743	0.938	5967	tags=55%, list=31%, signal=78%						KEGG_PHOSPHATIDYLINOSITOL_SIGNALING_SYSTEM	KEGG_PHOSPHATIDYLINOSITOL_SIGNALING_SYSTEM	Details ...	76	-0.375588	-1.31714	0.167323	0.656873	0.985	2914	tags=33%, list=15%, signal=39%
KEGG_HUNTINGTONS_DISEASE	KEGG_HUNTINGTONS_DISEASE		171	0.395236	1.41069	0.156942	0.444834	0.948	4108	tags=37%, list=21%, signal=47%						KEGG_CYTOKINE_CYTOKINE_RECEPTOR_INTERACTION	KEGG_CYTOKINE_CYTOKINE_RECEPTOR_INTERACTION		262	-0.346249	-1.31103	0.1875	0.640952	0.987	4916	tags=37%, list=25%, signal=48%
KEGG_PROTEIN_EXPORT	KEGG_PROTEIN_EXPORT		23	0.595479	1.41058	0.141732	0.4248	0.949	6325	tags=74%, list=32%, signal=109%						KEGG_FOCAL_ADHESION	KEGG_FOCAL_ADHESION		199	-0.356461	-1.30887	0.175403	0.617187	0.988	3364	tags=34%, list=17%, signal=40%
KEGG_OOCYTE_MEIOSIS	KEGG_OOCYTE_MEIOSIS		112	0.364545	1.40865	0.0878243	0.409921	0.949	3140	tags=32%, list=16%, signal=38%						KEGG_B_CELL_RECEPTOR_SIGNALING_PATHWAY	KEGG_B_CELL_RECEPTOR_SIGNALING_PATHWAY		75	-0.381662	-1.30482	0.178082	0.601066	0.989	3820	tags=39%, list=20%, signal=48%
KEGG_GLUTATHIONE_METABOLISM	KEGG_GLUTATHIONE_METABOLISM		47	0.441663	1.40341	0.0947581	0.401952	0.95	4552	tags=53%, list=23%, signal=69%						KEGG_MAPK_SIGNALING_PATHWAY	KEGG_MAPK_SIGNALING_PATHWAY		267	-0.317431	-1.2976	0.123711	0.592693	0.989	4958	tags=37%, list=25%, signal=49%
KEGG_FRUCTOSE_AND_MANNOSE_METABOLISM	KEGG_FRUCTOSE_AND_MANNOSE_METABOLISM		34	0.469298	1.39828	0.125483	0.394704	0.951	5671	tags=53%, list=29%, signal=75%						KEGG_PRIMARY_IMMUNODEFICIENCY	KEGG_PRIMARY_IMMUNODEFICIENCY		35	-0.55027	-1.29173	0.245322	0.582588	0.989	5547	tags=69%, list=28%, signal=96%
KEGG_GLYCOLYSIS_GLUCONEOGENESIS	KEGG_GLYCOLYSIS_GLUCONEOGENESIS		61	0.416194	1.38038	0.128405	0.41275	0.959	5234	tags=46%, list=27%, signal=63%						KEGG_ABC_TRANSPORTERS	KEGG_ABC_TRANSPORTERS		44	-0.391069	-1.28994	0.160896	0.563976	0.989	4513	tags=34%, list=23%, signal=44%
KEGG_TERPENOID_BACKBONE_BIOSYNTHESIS	KEGG_TERPENOID_BACKBONE_BIOSYNTHESIS		15	0.617965	1.37475	0.185484	0.407134	0.959	3606	tags=53%, list=18%, signal=65%						KEGG_T_CELL_RECEPTOR_SIGNALING_PATHWAY	KEGG_T_CELL_RECEPTOR_SIGNALING_PATHWAY		108	-0.367366	-1.28657	0.223762	0.550111	0.991	4894	tags=44%, list=25%, signal=59%
KEGG_DRUG_METABOLISM_OTHER_ENZYMES	KEGG_DRUG_METABOLISM_OTHER_ENZYMES		51	0.463594	1.3533	0.105051	0.434042	0.969	5669	tags=55%, list=29%, signal=77%						KEGG_LONG_TERM_POTENTIATION	KEGG_LONG_TERM_POTENTIATION		70	-0.346626	-1.26281	0.185714	0.58025	0.995	4037	tags=39%, list=21%, signal=48%
KEGG_PATHOGENIC_ESCHERICHIA_COLI_INFECTION	KEGG_PATHOGENIC_ESCHERICHIA_COLI_INFECTION		55	0.35055	1.3231	0.12549	0.480474	0.978	3869	tags=42%, list=20%, signal=52%						KEGG_SYSTEMIC_LUPUS_ERYTHEMATOSUS	KEGG_SYSTEMIC_LUPUS_ERYTHEMATOSUS		55	-0.441288	-1.25578	0.288845	0.575606	0.995	5958	tags=64%, list=31%, signal=91%
KEGG_GLYCOSYLPHOSPHATIDYLINOSITOL_GPI_ANCHOR_BIOSYNTHESIS	KEGG_GLYCOSYLPHOSPHATIDYLINOSITOL_GPI_ANCHOR_BIOSYNTHESIS		24	0.488775	1.31188	0.214575	0.486586	0.984	6332	tags=63%, list=32%, signal=92%						KEGG_FC_EPSILON_RI_SIGNALING_PATHWAY	KEGG_FC_EPSILON_RI_SIGNALING_PATHWAY		79	-0.325577	-1.24553	0.171717	0.578011	0.996	4914	tags=42%, list=25%, signal=56%
KEGG_ALANINE_ASPARTATE_AND_GLUTAMATE_METABOLISM	KEGG_ALANINE_ASPARTATE_AND_GLUTAMATE_METABOLISM		30	0.436692	1.31066	0.136	0.472739	0.984	4806	tags=53%, list=25%, signal=71%						KEGG_ALDOSTERONE_REGULATED_SODIUM_REABSORPTION	KEGG_ALDOSTERONE_REGULATED_SODIUM_REABSORPTION		42	-0.334616	-1.23251	0.186235	0.587049	0.998	5595	tags=45%, list=29%, signal=63%
KEGG_BASAL_TRANSCRIPTION_FACTORS	KEGG_BASAL_TRANSCRIPTION_FACTORS		35	0.425906	1.3049	0.1875	0.468887	0.985	4605	tags=43%, list=24%, signal=56%						KEGG_MTOR_SIGNALING_PATHWAY	KEGG_MTOR_SIGNALING_PATHWAY		51	-0.345942	-1.22171	0.233202	0.591984	0.998	2954	tags=31%, list=15%, signal=37%
KEGG_CYSTEINE_AND_METHIONINE_METABOLISM	KEGG_CYSTEINE_AND_METHIONINE_METABOLISM		34	0.392146	1.30426	0.111328	0.455959	0.986	4153	tags=41%, list=21%, signal=52%						KEGG_AUTOIMMUNE_THYROID_DISEASE	KEGG_AUTOIMMUNE_THYROID_DISEASE		50	-0.430462	-1.18868	0.337374	0.642339	0.998	6040	tags=46%, list=31%, signal=66%
KEGG_GALACTOSE_METABOLISM	KEGG_GALACTOSE_METABOLISM		26	0.436859	1.2974	0.173038	0.455432	0.988	3694	tags=35%, list=19%, signal=43%						KEGG_TYPE_II_DIABETES_MELLITUS	KEGG_TYPE_II_DIABETES_MELLITUS		47	-0.318643	-1.17259	0.245436	0.657313	0.998	6525	tags=51%, list=33%, signal=77%
KEGG_BLADDER_CANCER	KEGG_BLADDER_CANCER		42	0.361562	1.29629	0.134921	0.444424	0.988	3990	tags=45%, list=20%, signal=57%						KEGG_REGULATION_OF_ACTIN_CYTOSKELETON	KEGG_REGULATION_OF_ACTIN_CYTOSKELETON		212	-0.282442	-1.17049	0.264583	0.642526	0.998	5198	tags=40%, list=27%, signal=54%
KEGG_PEROXISOME	KEGG_PEROXISOME		78	0.39868	1.29185	0.197154	0.438968	0.989	6213	tags=50%, list=32%, signal=73%						KEGG_ARRHYTHMOGENIC_RIGHT_VENTRICULAR_CARDIOMYOPATHY_ARVC	KEGG_ARRHYTHMOGENIC_RIGHT_VENTRICULAR_CARDIOMYOPATHY_ARVC		74	-0.35645	-1.16983	0.311828	0.626287	0.998	3839	tags=43%, list=20%, signal=54%
KEGG_PURINE_METABOLISM	KEGG_PURINE_METABOLISM		157	0.296621	1.28325	0.138614	0.441978	0.99	3145	tags=30%, list=16%, signal=35%						KEGG_VIRAL_MYOCARDITIS	KEGG_VIRAL_MYOCARDITIS		68	-0.348405	-1.16953	0.272016	0.61008	0.998	5332	tags=47%, list=27%, signal=65%
KEGG_RNA_POLYMERASE	KEGG_RNA_POLYMERASE		29	0.4169	1.27956	0.187739	0.436089	0.99	7182	tags=69%, list=37%, signal=109%						KEGG_ALLOGRAFT_REJECTION	KEGG_ALLOGRAFT_REJECTION		35	-0.517378	-1.16445	0.346693	0.60405	0.998	6059	tags=60%, list=31%, signal=87%
KEGG_PYRUVATE_METABOLISM	KEGG_PYRUVATE_METABOLISM		40	0.41407	1.27905	0.193548	0.425637	0.99	4920	tags=48%, list=25%, signal=63%						KEGG_GNRH_SIGNALING_PATHWAY	KEGG_GNRH_SIGNALING_PATHWAY		101	-0.291657	-1.16251	0.252033	0.591986	0.998	3667	tags=28%, list=19%, signal=34%
KEGG_SPHINGOLIPID_METABOLISM	KEGG_SPHINGOLIPID_METABOLISM		39	0.396578	1.2776	0.193294	0.417259	0.99	3113	tags=36%, list=16%, signal=43%						KEGG_AXON_GUIDANCE	KEGG_AXON_GUIDANCE		129	-0.292021	-1.15063	0.284823	0.599119	0.998	3827	tags=31%, list=20%, signal=38%
KEGG_RIBOFLAVIN_METABOLISM	KEGG_RIBOFLAVIN_METABOLISM		16	0.434682	1.26827	0.156371	0.422061	0.992	3203	tags=31%, list=16%, signal=37%						KEGG_LEISHMANIA_INFECTION	KEGG_LEISHMANIA_INFECTION		68	-0.369488	-1.14348	0.330739	0.598744	0.998	6059	tags=56%, list=31%, signal=81%
KEGG_OXIDATIVE_PHOSPHORYLATION	KEGG_OXIDATIVE_PHOSPHORYLATION		116	0.462976	1.26797	0.288066	0.412382	0.992	6349	tags=61%, list=33%, signal=90%						KEGG_FC_GAMMA_R_MEDIATED_PHAGOCYTOSIS	KEGG_FC_GAMMA_R_MEDIATED_PHAGOCYTOSIS		95	-0.281846	-1.13538	0.26087	0.598925	0.999	3066	tags=28%, list=16%, signal=34%
KEGG_THYROID_CANCER	KEGG_THYROID_CANCER		29	0.384383	1.24735	0.213573	0.435404	0.995	3467	tags=48%, list=18%, signal=59%						KEGG_GAP_JUNCTION	KEGG_GAP_JUNCTION		89	-0.317358	-1.13307	0.316348	0.588649	0.999	5486	tags=45%, list=28%, signal=62%
KEGG_PENTOSE_AND_GLUCURONATE_INTERCONVERSIONS	KEGG_PENTOSE_AND_GLUCURONATE_INTERCONVERSIONS		28	0.494615	1.23507	0.242485	0.445453	0.997	6836	tags=64%, list=35%, signal=99%						KEGG_PRION_DISEASES	KEGG_PRION_DISEASES		35	-0.325351	-1.10475	0.317365	0.628618	1	5565	tags=54%, list=29%, signal=76%
KEGG_ALZHEIMERS_DISEASE	KEGG_ALZHEIMERS_DISEASE		157	0.356234	1.23194	0.26078	0.441031	0.997	4387	tags=39%, list=22%, signal=50%						KEGG_LONG_TERM_DEPRESSION	KEGG_LONG_TERM_DEPRESSION		70	-0.3026	-1.10389	0.331933	0.616256	1	3925	tags=34%, list=20%, signal=43%
KEGG_BIOSYNTHESIS_OF_UNSATURATED_FATTY_ACIDS	KEGG_BIOSYNTHESIS_OF_UNSATURATED_FATTY_ACIDS		22	0.41702	1.22338	0.24086	0.444944	0.997	4162	tags=55%, list=21%, signal=69%						KEGG_VEGF_SIGNALING_PATHWAY	KEGG_VEGF_SIGNALING_PATHWAY		76	-0.269097	-1.10047	0.302605	0.608905	1	4796	tags=38%, list=25%, signal=50%
KEGG_ARGININE_AND_PROLINE_METABOLISM	KEGG_ARGININE_AND_PROLINE_METABOLISM		54	0.36749	1.21205	0.23614	0.452967	0.997	5438	tags=54%, list=28%, signal=74%						KEGG_INOSITOL_PHOSPHATE_METABOLISM	KEGG_INOSITOL_PHOSPHATE_METABOLISM		54	-0.306699	-1.06656	0.406	0.656027	1	2747	tags=28%, list=14%, signal=32%
KEGG_GLYCOSPHINGOLIPID_BIOSYNTHESIS_LACTO_AND_NEOLACTO_SERIES	KEGG_GLYCOSPHINGOLIPID_BIOSYNTHESIS_LACTO_AND_NEOLACTO_SERIES		26	0.369137	1.20176	0.240234	0.459819	0.997	3351	tags=35%, list=17%, signal=42%						KEGG_GLIOMA	KEGG_GLIOMA		65	-0.277243	-1.06355	0.367387	0.647997	1	3129	tags=28%, list=16%, signal=33%
KEGG_MATURITY_ONSET_DIABETES_OF_THE_YOUNG	KEGG_MATURITY_ONSET_DIABETES_OF_THE_YOUNG		25	0.450935	1.19409	0.269231	0.462642	0.998	4975	tags=44%, list=26%, signal=59%						KEGG_NEUROTROPHIN_SIGNALING_PATHWAY	KEGG_NEUROTROPHIN_SIGNALING_PATHWAY		125	-0.254687	-1.05834	0.391919	0.644081	1	3364	tags=26%, list=17%, signal=32%
KEGG_O_GLYCAN_BIOSYNTHESIS	KEGG_O_GLYCAN_BIOSYNTHESIS		30	0.378696	1.17514	0.269155	0.4849	0.998	1711	tags=27%, list=9%, signal=29%						KEGG_PRIMARY_BILE_ACID_BIOSYNTHESIS	KEGG_PRIMARY_BILE_ACID_BIOSYNTHESIS		16	-0.356588	-1.04219	0.394366	0.660172	1	4614	tags=44%, list=24%, signal=57%
KEGG_PARKINSONS_DISEASE	KEGG_PARKINSONS_DISEASE		113	0.393387	1.14051	0.376782	0.535054	0.998	6052	tags=54%, list=31%, signal=78%						KEGG_TYROSINE_METABOLISM	KEGG_TYROSINE_METABOLISM		42	-0.27235	-1.04118	0.394191	0.648897	1	3749	tags=26%, list=19%, signal=32%
KEGG_BUTANOATE_METABOLISM	KEGG_BUTANOATE_METABOLISM		34	0.377777	1.1282	0.320641	0.545844	0.999	4898	tags=44%, list=25%, signal=59%						KEGG_GLYCOSAMINOGLYCAN_BIOSYNTHESIS_HEPARAN_SULFATE	KEGG_GLYCOSAMINOGLYCAN_BIOSYNTHESIS_HEPARAN_SULFATE		26	-0.341059	-1.04024	0.399168	0.637897	1	6122	tags=50%, list=31%, signal=73%
KEGG_PROGESTERONE_MEDIATED_OOCYTE_MATURATION	KEGG_PROGESTERONE_MEDIATED_OOCYTE_MATURATION		85	0.297826	1.11746	0.326572	0.554578	0.999	2982	tags=29%, list=15%, signal=35%						KEGG_ERBB_SIGNALING_PATHWAY	KEGG_ERBB_SIGNALING_PATHWAY		87	-0.274644	-1.0295	0.423935	0.644067	1	3364	tags=28%, list=17%, signal=33%
KEGG_UBIQUITIN_MEDIATED_PROTEOLYSIS	KEGG_UBIQUITIN_MEDIATED_PROTEOLYSIS		133	0.292829	1.083	0.386408	0.602969	0.999	4293	tags=33%, list=22%, signal=42%						KEGG_PATHWAYS_IN_CANCER	KEGG_PATHWAYS_IN_CANCER		325	-0.239336	-1.02886	0.425051	0.633222	1	2914	tags=24%, list=15%, signal=28%
KEGG_CYTOSOLIC_DNA_SENSING_PATHWAY	KEGG_CYTOSOLIC_DNA_SENSING_PATHWAY		53	0.304107	1.0814	0.355865	0.594496	0.999	6443	tags=43%, list=33%, signal=65%						KEGG_RENIN_ANGIOTENSIN_SYSTEM	KEGG_RENIN_ANGIOTENSIN_SYSTEM		17	-0.369024	-1.02778	0.423828	0.623338	1	2941	tags=35%, list=15%, signal=42%
KEGG_PORPHYRIN_AND_CHLOROPHYLL_METABOLISM	KEGG_PORPHYRIN_AND_CHLOROPHYLL_METABOLISM		40	0.375197	1.07985	0.352459	0.586742	0.999	6510	tags=55%, list=33%, signal=82%						KEGG_ACUTE_MYELOID_LEUKEMIA	KEGG_ACUTE_MYELOID_LEUKEMIA		57	-0.289807	-1.0217	0.441176	0.622227	1	2711	tags=25%, list=14%, signal=28%
KEGG_SNARE_INTERACTIONS_IN_VESICULAR_TRANSPORT	KEGG_SNARE_INTERACTIONS_IN_VESICULAR_TRANSPORT		38	0.293317	1.07491	0.348361	0.584344	0.999	2284	tags=26%, list=12%, signal=30%						KEGG_WNT_SIGNALING_PATHWAY	KEGG_WNT_SIGNALING_PATHWAY		150	-0.248492	-0.99551	0.467505	0.654776	1	3455	tags=25%, list=18%, signal=31%
KEGG_GLYCEROPHOSPHOLIPID_METABOLISM	KEGG_GLYCEROPHOSPHOLIPID_METABOLISM		77	0.273491	1.0591	0.359596	0.601231	0.999	4054	tags=32%, list=21%, signal=41%						KEGG_JAK_STAT_SIGNALING_PATHWAY	KEGG_JAK_STAT_SIGNALING_PATHWAY		155	-0.263784	-0.990867	0.472946	0.651411	1	6525	tags=45%, list=33%, signal=67%
KEGG_PANCREATIC_CANCER	KEGG_PANCREATIC_CANCER		70	0.272284	1.05035	0.386847	0.606451	0.999	3990	tags=31%, list=20%, signal=39%						KEGG_COMPLEMENT_AND_COAGULATION_CASCADES	KEGG_COMPLEMENT_AND_COAGULATION_CASCADES		69	-0.290228	-0.986878	0.488372	0.647445	1	5565	tags=41%, list=29%, signal=57%
KEGG_GLYCOSAMINOGLYCAN_BIOSYNTHESIS_KERATAN_SULFATE	KEGG_GLYCOSAMINOGLYCAN_BIOSYNTHESIS_KERATAN_SULFATE		15	0.365453	1.04717	0.397149	0.601366	0.999	3351	tags=40%, list=17%, signal=48%						KEGG_NICOTINATE_AND_NICOTINAMIDE_METABOLISM	KEGG_NICOTINATE_AND_NICOTINAMIDE_METABOLISM		24	-0.282057	-0.951962	0.537572	0.693004	1	1006	tags=13%, list=5%, signal=13%
KEGG_ASCORBATE_AND_ALDARATE_METABOLISM	KEGG_ASCORBATE_AND_ALDARATE_METABOLISM		25	0.424297	1.02581	0.455102	0.628551	1	6510	tags=60%, list=33%, signal=90%						KEGG_ARACHIDONIC_ACID_METABOLISM	KEGG_ARACHIDONIC_ACID_METABOLISM		57	-0.269213	-0.927983	0.545817	0.721218	1	3884	tags=25%, list=20%, signal=31%
KEGG_SMALL_CELL_LUNG_CANCER	KEGG_SMALL_CELL_LUNG_CANCER		84	0.266423	0.994863	0.463855	0.670996	1	3990	tags=37%, list=20%, signal=46%						KEGG_AMYOTROPHIC_LATERAL_SCLEROSIS_ALS	KEGG_AMYOTROPHIC_LATERAL_SCLEROSIS_ALS		52	-0.224809	-0.922394	0.599214	0.719097	1	4787	tags=35%, list=25%, signal=46%
KEGG_APOPTOSIS	KEGG_APOPTOSIS		86	0.261164	0.993045	0.450505	0.663297	1	3169	tags=29%, list=16%, signal=35%						KEGG_RENAL_CELL_CARCINOMA	KEGG_RENAL_CELL_CARCINOMA		70	-0.245393	-0.913768	0.568589	0.722141	1	4916	tags=39%, list=25%, signal=51%
KEGG_LYSINE_DEGRADATION	KEGG_LYSINE_DEGRADATION		44	0.310634	0.975835	0.503145	0.682116	1	6034	tags=45%, list=31%, signal=66%						KEGG_TYPE_I_DIABETES_MELLITUS	KEGG_TYPE_I_DIABETES_MELLITUS		41	-0.353002	-0.907316	0.542914	0.721667	1	6059	tags=51%, list=31%, signal=74%
KEGG_PROXIMAL_TUBULE_BICARBONATE_RECLAMATION	KEGG_PROXIMAL_TUBULE_BICARBONATE_RECLAMATION		23	0.316454	0.959202	0.488565	0.700713	1	4152	tags=39%, list=21%, signal=50%						KEGG_GRAFT_VERSUS_HOST_DISEASE	KEGG_GRAFT_VERSUS_HOST_DISEASE		37	-0.381326	-0.895821	0.555118	0.730152	1	5958	tags=46%, list=31%, signal=66%
KEGG_GLYCOSAMINOGLYCAN_DEGRADATION	KEGG_GLYCOSAMINOGLYCAN_DEGRADATION		21	0.318528	0.955937	0.526	0.695773	1	3557	tags=29%, list=18%, signal=35%						KEGG_ADHERENS_JUNCTION	KEGG_ADHERENS_JUNCTION		73	-0.239764	-0.889404	0.621053	0.729236	1	3232	tags=29%, list=17%, signal=34%
KEGG_VIBRIO_CHOLERAE_INFECTION	KEGG_VIBRIO_CHOLERAE_INFECTION		54	0.248161	0.946451	0.551923	0.701581	1	6634	tags=54%, list=34%, signal=81%						KEGG_NON_SMALL_CELL_LUNG_CANCER	KEGG_NON_SMALL_CELL_LUNG_CANCER		54	-0.238089	-0.888965	0.620079	0.719024	1	2914	tags=22%, list=15%, signal=26%
KEGG_RETINOL_METABOLISM	KEGG_RETINOL_METABOLISM		64	0.347638	0.946243	0.521472	0.69163	1	6510	tags=47%, list=33%, signal=70%						KEGG_INSULIN_SIGNALING_PATHWAY	KEGG_INSULIN_SIGNALING_PATHWAY		137	-0.222004	-0.888348	0.625767	0.709629	1	6263	tags=39%, list=32%, signal=58%
KEGG_STARCH_AND_SUCROSE_METABOLISM	KEGG_STARCH_AND_SUCROSE_METABOLISM		51	0.299258	0.941598	0.546012	0.689581	1	7887	tags=57%, list=40%, signal=95%						KEGG_NATURAL_KILLER_CELL_MEDIATED_CYTOTOXICITY	KEGG_NATURAL_KILLER_CELL_MEDIATED_CYTOTOXICITY		131	-0.238175	-0.871395	0.556452	0.727052	1	3878	tags=25%, list=20%, signal=31%
KEGG_RIBOSOME	KEGG_RIBOSOME		87	0.418314	0.936815	0.539216	0.688409	1	8343	tags=63%, list=43%, signal=110%						KEGG_DORSO_VENTRAL_AXIS_FORMATION	KEGG_DORSO_VENTRAL_AXIS_FORMATION		24	-0.287763	-0.868954	0.635815	0.720383	1	5198	tags=42%, list=27%, signal=57%
KEGG_NITROGEN_METABOLISM	KEGG_NITROGEN_METABOLISM		23	0.296068	0.917875	0.585317	0.709522	1	7923	tags=74%, list=41%, signal=124%						KEGG_TOLL_LIKE_RECEPTOR_SIGNALING_PATHWAY	KEGG_TOLL_LIKE_RECEPTOR_SIGNALING_PATHWAY		101	-0.235992	-0.867397	0.607767	0.712576	1	6064	tags=42%, list=31%, signal=60%
KEGG_TIGHT_JUNCTION	KEGG_TIGHT_JUNCTION		131	0.222354	0.915422	0.594961	0.703261	1	4465	tags=34%, list=23%, signal=43%						KEGG_MELANOMA	KEGG_MELANOMA		71	-0.227369	-0.861619	0.658849	0.711713	1	2908	tags=21%, list=15%, signal=25%
KEGG_PANTOTHENATE_AND_COA_BIOSYNTHESIS	KEGG_PANTOTHENATE_AND_COA_BIOSYNTHESIS		16	0.324504	0.907491	0.575569	0.707022	1	5107	tags=44%, list=26%, signal=59%						KEGG_ENDOMETRIAL_CANCER	KEGG_ENDOMETRIAL_CANCER		52	-0.238119	-0.858896	0.606178	0.705986	1	2711	tags=21%, list=14%, signal=25%
KEGG_ETHER_LIPID_METABOLISM	KEGG_ETHER_LIPID_METABOLISM		33	0.27008	0.872641	0.658683	0.755024	1	4054	tags=36%, list=21%, signal=46%						KEGG_TGF_BETA_SIGNALING_PATHWAY	KEGG_TGF_BETA_SIGNALING_PATHWAY		85	-0.234828	-0.847034	0.619247	0.713679	1	5198	tags=35%, list=27%, signal=48%
KEGG_NOTCH_SIGNALING_PATHWAY	KEGG_NOTCH_SIGNALING_PATHWAY		47	0.261454	0.857741	0.648485	0.769453	1	3155	tags=28%, list=16%, signal=33%						KEGG_CARDIAC_MUSCLE_CONTRACTION	KEGG_CARDIAC_MUSCLE_CONTRACTION		73	-0.247199	-0.840327	0.687375	0.714511	1	3098	tags=25%, list=16%, signal=29%
KEGG_GLYCEROLIPID_METABOLISM	KEGG_GLYCEROLIPID_METABOLISM		48	0.237461	0.829509	0.702041	0.80614	1	5756	tags=44%, list=30%, signal=62%						KEGG_PHENYLALANINE_METABOLISM	KEGG_PHENYLALANINE_METABOLISM		18	-0.252022	-0.836408	0.727273	0.710879	1	4422	tags=28%, list=23%, signal=36%
KEGG_STEROID_HORMONE_BIOSYNTHESIS	KEGG_STEROID_HORMONE_BIOSYNTHESIS		55	0.278134	0.824778	0.66998	0.80269	1	6759	tags=49%, list=35%, signal=75%						KEGG_COLORECTAL_CANCER	KEGG_COLORECTAL_CANCER		62	-0.230715	-0.83568	0.666667	0.702651	1	2711	tags=21%, list=14%, signal=24%
KEGG_CHRONIC_MYELOID_LEUKEMIA	KEGG_CHRONIC_MYELOID_LEUKEMIA		73	0.225788	0.823094	0.711382	0.795124	1	3467	tags=29%, list=18%, signal=35%						KEGG_PROSTATE_CANCER	KEGG_PROSTATE_CANCER		89	-0.210801	-0.827463	0.690619	0.705121	1	4832	tags=33%, list=25%, signal=43%
KEGG_GLYCINE_SERINE_AND_THREONINE_METABOLISM	KEGG_GLYCINE_SERINE_AND_THREONINE_METABOLISM		31	0.257151	0.815681	0.715768	0.796076	1	5222	tags=42%, list=27%, signal=57%						KEGG_VASOPRESSIN_REGULATED_WATER_REABSORPTION	KEGG_VASOPRESSIN_REGULATED_WATER_REABSORPTION		44	-0.223257	-0.782639	0.763006	0.760694	1	3596	tags=23%, list=18%, signal=28%
KEGG_VALINE_LEUCINE_AND_ISOLEUCINE_DEGRADATION	KEGG_VALINE_LEUCINE_AND_ISOLEUCINE_DEGRADATION		44	0.281951	0.814463	0.649798	0.788108	1	4898	tags=36%, list=25%, signal=48%						KEGG_ALPHA_LINOLENIC_ACID_METABOLISM	KEGG_ALPHA_LINOLENIC_ACID_METABOLISM		19	-0.255733	-0.73678	0.827368	0.813899	1	4796	tags=37%, list=25%, signal=49%
KEGG_EPITHELIAL_CELL_SIGNALING_IN_HELICOBACTER_PYLORI_INFECTION	KEGG_EPITHELIAL_CELL_SIGNALING_IN_HELICOBACTER_PYLORI_INFECTION		68	0.213326	0.806492	0.752577	0.790832	1	2465	tags=21%, list=13%, signal=23%						KEGG_TRYPTOPHAN_METABOLISM	KEGG_TRYPTOPHAN_METABOLISM		39	-0.193472	-0.67948	0.905039	0.876939	1	3405	tags=18%, list=17%, signal=22%
KEGG_BETA_ALANINE_METABOLISM	KEGG_BETA_ALANINE_METABOLISM		22	0.266366	0.794625	0.743083	0.799275	1	4898	tags=45%, list=25%, signal=61%						KEGG_REGULATION_OF_AUTOPHAGY	KEGG_REGULATION_OF_AUTOPHAGY		34	-0.175695	-0.665341	0.898406	0.882142	1	2390	tags=12%, list=12%, signal=13%
KEGG_HISTIDINE_METABOLISM	KEGG_HISTIDINE_METABOLISM		29	0.246394	0.792724	0.754527	0.792441	1	4898	tags=34%, list=25%, signal=46%						KEGG_RIG_I_LIKE_RECEPTOR_SIGNALING_PATHWAY	KEGG_RIG_I_LIKE_RECEPTOR_SIGNALING_PATHWAY		70	-0.131786	-0.511826	0.99389	0.980089	1	3851	tags=16%, list=20%, signal=20%
KEGG_FATTY_ACID_METABOLISM	KEGG_FATTY_ACID_METABOLISM		42	0.263649	0.784066	0.705645	0.795609	1	5141	tags=38%, list=26%, signal=52%						KEGG_OLFACTORY_TRANSDUCTION	KEGG_OLFACTORY_TRANSDUCTION		371	-0.144508	-0.434907	0.965885	0.988955	1	16000	tags=99%, list=82%, signal=539%
KEGG_PROPANOATE_METABOLISM	KEGG_PROPANOATE_METABOLISM		32	0.279993	0.782728	0.667327	0.788022	1	4898	tags=41%, list=25%, signal=54%
KEGG_ENDOCYTOSIS	KEGG_ENDOCYTOSIS		181	0.191037	0.775425	0.79798	0.79	1	4627	tags=29%, list=24%, signal=37%
KEGG_LYSOSOME	KEGG_LYSOSOME		121	0.21645	0.766315	0.704082	0.79316	1	6369	tags=37%, list=33%, signal=55%
KEGG_OTHER_GLYCAN_DEGRADATION	KEGG_OTHER_GLYCAN_DEGRADATION		16	0.300458	0.754915	0.717694	0.799287	1	6870	tags=44%, list=35%, signal=67%
KEGG_NOD_LIKE_RECEPTOR_SIGNALING_PATHWAY	KEGG_NOD_LIKE_RECEPTOR_SIGNALING_PATHWAY		62	0.210458	0.733251	0.804124	0.819894	1	2179	tags=19%, list=11%, signal=22%
KEGG_METABOLISM_OF_XENOBIOTICS_BY_CYTOCHROME_P450	KEGG_METABOLISM_OF_XENOBIOTICS_BY_CYTOCHROME_P450		68	0.256593	0.71935	0.789474	0.82999	1	4295	tags=28%, list=22%, signal=36%
KEGG_PPAR_SIGNALING_PATHWAY	KEGG_PPAR_SIGNALING_PATHWAY		69	0.202058	0.675501	0.848548	0.873747	1	4909	tags=36%, list=25%, signal=48%
KEGG_LINOLEIC_ACID_METABOLISM	KEGG_LINOLEIC_ACID_METABOLISM		29	0.224585	0.643314	0.910646	0.899451	1	4054	tags=28%, list=21%, signal=35%
KEGG_ANTIGEN_PROCESSING_AND_PRESENTATION	KEGG_ANTIGEN_PROCESSING_AND_PRESENTATION		80	0.198458	0.611719	0.82549	0.9189	1	4113	tags=25%, list=21%, signal=32%
KEGG_DRUG_METABOLISM_CYTOCHROME_P450	KEGG_DRUG_METABOLISM_CYTOCHROME_P450		70	0.201726	0.576396	0.934959	0.935265	1	4330	tags=26%, list=22%, signal=33%

## Sheet: DDX3Y
HIGH															LOW
NAME	GS<br> follow link to MSigDB	GS DETAILS	SIZE	ES	NES	NOM p-val	FDR q-val	FWER p-val	RANK AT MAX	LEADING EDGE					NAME	GS<br> follow link to MSigDB	GS DETAILS	SIZE	ES	NES	NOM p-val	FDR q-val	FWER p-val	RANK AT MAX	LEADING EDGE
KEGG_PRIMARY_BILE_ACID_BIOSYNTHESIS	KEGG_PRIMARY_BILE_ACID_BIOSYNTHESIS	Details ...	16	0.597034	1.68459	0.0161616	1	0.506	4691	tags=56%, list=24%, signal=74%					KEGG_PROXIMAL_TUBULE_BICARBONATE_RECLAMATION	KEGG_PROXIMAL_TUBULE_BICARBONATE_RECLAMATION	Details ...	23	-0.586223	-1.85824	0	0.184507	0.166	3105	tags=61%, list=16%, signal=72%
KEGG_GLYCOSAMINOGLYCAN_BIOSYNTHESIS_CHONDROITIN_SULFATE	KEGG_GLYCOSAMINOGLYCAN_BIOSYNTHESIS_CHONDROITIN_SULFATE	Details ...	22	0.666192	1.57744	0.0468085	1	0.759	5432	tags=82%, list=28%, signal=113%					KEGG_GLYOXYLATE_AND_DICARBOXYLATE_METABOLISM	KEGG_GLYOXYLATE_AND_DICARBOXYLATE_METABOLISM	Details ...	16	-0.618199	-1.53242	0.0745968	1	0.829	2134	tags=56%, list=11%, signal=63%
KEGG_GLYCOSPHINGOLIPID_BIOSYNTHESIS_GANGLIO_SERIES	KEGG_GLYCOSPHINGOLIPID_BIOSYNTHESIS_GANGLIO_SERIES	Details ...	15	0.587258	1.55983	0.0575397	1	0.788	2067	tags=40%, list=11%, signal=45%					KEGG_PARKINSONS_DISEASE	KEGG_PARKINSONS_DISEASE	Details ...	113	-0.481433	-1.43561	0.177189	1	0.929	4563	tags=53%, list=23%, signal=69%
KEGG_GLYCOSAMINOGLYCAN_DEGRADATION	KEGG_GLYCOSAMINOGLYCAN_DEGRADATION	Details ...	21	0.555096	1.49883	0.0708502	1	0.886	3633	tags=48%, list=19%, signal=58%					KEGG_OXIDATIVE_PHOSPHORYLATION	KEGG_OXIDATIVE_PHOSPHORYLATION	Details ...	116	-0.490473	-1.36702	0.211618	1	0.969	4413	tags=52%, list=23%, signal=66%
KEGG_COMPLEMENT_AND_COAGULATION_CASCADES	KEGG_COMPLEMENT_AND_COAGULATION_CASCADES	Details ...	69	0.452623	1.49399	0.0783939	1	0.89	6568	tags=58%, list=34%, signal=87%					KEGG_CELL_CYCLE	KEGG_CELL_CYCLE	Details ...	124	-0.424544	-1.31387	0.225743	1	0.984	3407	tags=44%, list=17%, signal=53%
KEGG_TASTE_TRANSDUCTION	KEGG_TASTE_TRANSDUCTION	Details ...	51	0.487705	1.48854	0.0933063	1	0.891	4851	tags=53%, list=25%, signal=70%					KEGG_ONE_CARBON_POOL_BY_FOLATE	KEGG_ONE_CARBON_POOL_BY_FOLATE	Details ...	17	-0.538877	-1.29452	0.211881	1	0.987	3228	tags=65%, list=17%, signal=77%
KEGG_MTOR_SIGNALING_PATHWAY	KEGG_MTOR_SIGNALING_PATHWAY	Details ...	51	0.411612	1.48598	0.0653465	1	0.894	3478	tags=33%, list=18%, signal=40%					KEGG_BASE_EXCISION_REPAIR	KEGG_BASE_EXCISION_REPAIR	Details ...	33	-0.502722	-1.26811	0.251012	1	0.99	1998	tags=36%, list=10%, signal=40%
KEGG_DORSO_VENTRAL_AXIS_FORMATION	KEGG_DORSO_VENTRAL_AXIS_FORMATION	Details ...	24	0.462703	1.48144	0.0582329	1	0.899	3552	tags=38%, list=18%, signal=46%					KEGG_RIBOSOME	KEGG_RIBOSOME	Details ...	87	-0.566858	-1.2519	0.323651	1	0.991	3530	tags=75%, list=18%, signal=91%
KEGG_ABC_TRANSPORTERS	KEGG_ABC_TRANSPORTERS	Details ...	44	0.443218	1.46938	0.0668016	1	0.907	5058	tags=48%, list=26%, signal=64%					KEGG_PROTEASOME	KEGG_PROTEASOME	Details ...	44	-0.537996	-1.24046	0.295455	1	0.992	4459	tags=57%, list=23%, signal=73%
KEGG_GLYCEROPHOSPHOLIPID_METABOLISM	KEGG_GLYCEROPHOSPHOLIPID_METABOLISM	Details ...	77	0.367702	1.43778	0.0457256	1	0.93	3124	tags=27%, list=16%, signal=32%					KEGG_PATHOGENIC_ESCHERICHIA_COLI_INFECTION	KEGG_PATHOGENIC_ESCHERICHIA_COLI_INFECTION	Details ...	55	-0.316536	-1.22861	0.173913	1	0.994	2324	tags=27%, list=12%, signal=31%
KEGG_CALCIUM_SIGNALING_PATHWAY	KEGG_CALCIUM_SIGNALING_PATHWAY	Details ...	177	0.381738	1.42922	0.0705394	1	0.935	4851	tags=34%, list=25%, signal=45%					KEGG_OOCYTE_MEIOSIS	KEGG_OOCYTE_MEIOSIS	Details ...	112	-0.319804	-1.20181	0.24165	1	0.994	3501	tags=34%, list=18%, signal=41%
KEGG_O_GLYCAN_BIOSYNTHESIS	KEGG_O_GLYCAN_BIOSYNTHESIS	Details ...	30	0.47748	1.4214	0.0843137	1	0.941	4882	tags=43%, list=25%, signal=58%					KEGG_RNA_DEGRADATION	KEGG_RNA_DEGRADATION	Details ...	57	-0.415916	-1.19794	0.312625	1	0.995	3768	tags=46%, list=19%, signal=56%
KEGG_VASCULAR_SMOOTH_MUSCLE_CONTRACTION	KEGG_VASCULAR_SMOOTH_MUSCLE_CONTRACTION	Details ...	115	0.396484	1.41782	0.112936	0.949006	0.944	5139	tags=36%, list=26%, signal=48%					KEGG_PYRIMIDINE_METABOLISM	KEGG_PYRIMIDINE_METABOLISM	Details ...	98	-0.358426	-1.18088	0.30315	1	0.995	2674	tags=36%, list=14%, signal=41%
KEGG_SPHINGOLIPID_METABOLISM	KEGG_SPHINGOLIPID_METABOLISM	Details ...	39	0.448716	1.41619	0.109562	0.887818	0.946	4325	tags=31%, list=22%, signal=39%					KEGG_GLYCOLYSIS_GLUCONEOGENESIS	KEGG_GLYCOLYSIS_GLUCONEOGENESIS	Details ...	61	-0.358311	-1.17338	0.270103	0.992879	0.997	3626	tags=43%, list=19%, signal=52%
KEGG_NICOTINATE_AND_NICOTINAMIDE_METABOLISM	KEGG_NICOTINATE_AND_NICOTINAMIDE_METABOLISM	Details ...	24	0.408763	1.40242	0.0689655	0.882898	0.949	6021	tags=50%, list=31%, signal=72%					KEGG_PYRUVATE_METABOLISM	KEGG_PYRUVATE_METABOLISM	Details ...	40	-0.389867	-1.14984	0.303462	0.999337	0.998	2647	tags=38%, list=14%, signal=43%
KEGG_GLYCOSYLPHOSPHATIDYLINOSITOL_GPI_ANCHOR_BIOSYNTHESIS	KEGG_GLYCOSYLPHOSPHATIDYLINOSITOL_GPI_ANCHOR_BIOSYNTHESIS	Details ...	24	0.475267	1.3886	0.129741	0.884087	0.956	6967	tags=63%, list=36%, signal=97%					KEGG_P53_SIGNALING_PATHWAY	KEGG_P53_SIGNALING_PATHWAY	Details ...	68	-0.352629	-1.14308	0.312757	0.955689	0.998	3231	tags=40%, list=17%, signal=47%
KEGG_NOTCH_SIGNALING_PATHWAY	KEGG_NOTCH_SIGNALING_PATHWAY	Details ...	47	0.422822	1.38785	0.126273	0.835072	0.956	3438	tags=32%, list=18%, signal=39%					KEGG_CYSTEINE_AND_METHIONINE_METABOLISM	KEGG_CYSTEINE_AND_METHIONINE_METABOLISM	Details ...	34	-0.364433	-1.13964	0.327273	0.909978	0.998	3864	tags=50%, list=20%, signal=62%
KEGG_ETHER_LIPID_METABOLISM	KEGG_ETHER_LIPID_METABOLISM	Details ...	33	0.404244	1.38759	0.086	0.789195	0.956	1893	tags=24%, list=10%, signal=27%					KEGG_DNA_REPLICATION	KEGG_DNA_REPLICATION	Details ...	36	-0.467345	-1.11579	0.408081	0.923419	0.998	2674	tags=42%, list=14%, signal=48%
KEGG_GLYCOSAMINOGLYCAN_BIOSYNTHESIS_HEPARAN_SULFATE	KEGG_GLYCOSAMINOGLYCAN_BIOSYNTHESIS_HEPARAN_SULFATE	Details ...	26	0.486842	1.38276	0.126273	0.763651	0.957	5169	tags=54%, list=27%, signal=73%					KEGG_CARDIAC_MUSCLE_CONTRACTION	KEGG_CARDIAC_MUSCLE_CONTRACTION	Details ...	73	-0.314749	-1.1089	0.313025	0.893789	0.998	4032	tags=40%, list=21%, signal=50%
KEGG_FC_GAMMA_R_MEDIATED_PHAGOCYTOSIS	KEGG_FC_GAMMA_R_MEDIATED_PHAGOCYTOSIS	Details ...	95	0.338436	1.36224	0.119608	0.796834	0.964	5790	tags=36%, list=30%, signal=51%					KEGG_RNA_POLYMERASE	KEGG_RNA_POLYMERASE	Details ...	29	-0.374041	-1.10698	0.354582	0.85429	0.998	3552	tags=38%, list=18%, signal=46%
KEGG_PRION_DISEASES	KEGG_PRION_DISEASES		35	0.392906	1.35871	0.100971	0.770633	0.965	1681	tags=20%, list=9%, signal=22%					KEGG_SPLICEOSOME	KEGG_SPLICEOSOME		126	-0.402627	-1.10142	0.420945	0.828059	0.998	4193	tags=46%, list=21%, signal=58%
KEGG_RENIN_ANGIOTENSIN_SYSTEM	KEGG_RENIN_ANGIOTENSIN_SYSTEM		17	0.47754	1.35469	0.12249	0.748717	0.967	4169	tags=41%, list=21%, signal=52%					KEGG_HUNTINGTONS_DISEASE	KEGG_HUNTINGTONS_DISEASE		171	-0.302918	-1.07094	0.390397	0.864943	0.998	3810	tags=37%, list=20%, signal=46%
KEGG_MELANOGENESIS	KEGG_MELANOGENESIS		101	0.353067	1.34514	0.116424	0.746682	0.969	5522	tags=37%, list=28%, signal=51%					KEGG_CITRATE_CYCLE_TCA_CYCLE	KEGG_CITRATE_CYCLE_TCA_CYCLE		30	-0.439069	-1.04433	0.452333	0.892416	0.999	3155	tags=40%, list=16%, signal=48%
KEGG_GLYCOSAMINOGLYCAN_BIOSYNTHESIS_KERATAN_SULFATE	KEGG_GLYCOSAMINOGLYCAN_BIOSYNTHESIS_KERATAN_SULFATE		15	0.52416	1.33098	0.153082	0.759025	0.974	3521	tags=33%, list=18%, signal=41%					KEGG_ARGININE_AND_PROLINE_METABOLISM	KEGG_ARGININE_AND_PROLINE_METABOLISM		54	-0.311559	-1.03351	0.416499	0.882041	1	3557	tags=41%, list=18%, signal=50%
KEGG_GLIOMA	KEGG_GLIOMA		65	0.353276	1.32992	0.123232	0.732171	0.977	2527	tags=22%, list=13%, signal=25%					KEGG_GLYCINE_SERINE_AND_THREONINE_METABOLISM	KEGG_GLYCINE_SERINE_AND_THREONINE_METABOLISM		31	-0.309811	-1.02605	0.405941	0.864819	1	3242	tags=32%, list=17%, signal=39%
KEGG_ECM_RECEPTOR_INTERACTION	KEGG_ECM_RECEPTOR_INTERACTION		83	0.434901	1.31865	0.188641	0.738721	0.981	5664	tags=49%, list=29%, signal=69%					KEGG_BASAL_TRANSCRIPTION_FACTORS	KEGG_BASAL_TRANSCRIPTION_FACTORS		35	-0.315516	-0.975997	0.482692	0.947332	1	3454	tags=31%, list=18%, signal=38%
KEGG_ENDOCYTOSIS	KEGG_ENDOCYTOSIS		181	0.319816	1.31058	0.118367	0.735484	0.982	5240	tags=34%, list=27%, signal=46%					KEGG_BETA_ALANINE_METABOLISM	KEGG_BETA_ALANINE_METABOLISM		22	-0.319133	-0.947411	0.547244	0.976327	1	2625	tags=32%, list=13%, signal=37%
KEGG_RENAL_CELL_CARCINOMA	KEGG_RENAL_CELL_CARCINOMA		70	0.350642	1.30373	0.169811	0.727469	0.983	4252	tags=30%, list=22%, signal=38%					KEGG_VALINE_LEUCINE_AND_ISOLEUCINE_DEGRADATION	KEGG_VALINE_LEUCINE_AND_ISOLEUCINE_DEGRADATION		44	-0.334513	-0.924072	0.537402	0.996257	1	5126	tags=52%, list=26%, signal=71%
KEGG_OTHER_GLYCAN_DEGRADATION	KEGG_OTHER_GLYCAN_DEGRADATION		16	0.542646	1.29816	0.216634	0.718721	0.985	5590	tags=56%, list=29%, signal=79%					KEGG_NUCLEOTIDE_EXCISION_REPAIR	KEGG_NUCLEOTIDE_EXCISION_REPAIR		44	-0.314134	-0.923716	0.545635	0.962865	1	2659	tags=27%, list=14%, signal=32%
KEGG_GNRH_SIGNALING_PATHWAY	KEGG_GNRH_SIGNALING_PATHWAY		101	0.321756	1.2896	0.136842	0.721087	0.987	5157	tags=32%, list=26%, signal=43%					KEGG_ALZHEIMERS_DISEASE	KEGG_ALZHEIMERS_DISEASE		157	-0.250873	-0.87346	0.56875	1	1	4166	tags=36%, list=21%, signal=46%
KEGG_CYTOKINE_CYTOKINE_RECEPTOR_INTERACTION	KEGG_CYTOKINE_CYTOKINE_RECEPTOR_INTERACTION		262	0.338134	1.28613	0.158301	0.70701	0.988	5106	tags=34%, list=26%, signal=45%					KEGG_PURINE_METABOLISM	KEGG_PURINE_METABOLISM		157	-0.194789	-0.847968	0.664646	1	1	2868	tags=26%, list=15%, signal=30%
KEGG_PHOSPHATIDYLINOSITOL_SIGNALING_SYSTEM	KEGG_PHOSPHATIDYLINOSITOL_SIGNALING_SYSTEM		76	0.351311	1.24463	0.212982	0.795898	0.993	6423	tags=43%, list=33%, signal=64%					KEGG_AMINOACYL_TRNA_BIOSYNTHESIS	KEGG_AMINOACYL_TRNA_BIOSYNTHESIS		22	-0.368199	-0.845162	0.630738	1	1	5447	tags=68%, list=28%, signal=94%
KEGG_GAP_JUNCTION	KEGG_GAP_JUNCTION		89	0.321657	1.23089	0.216769	0.80896	0.994	5385	tags=35%, list=28%, signal=48%					KEGG_THYROID_CANCER	KEGG_THYROID_CANCER		29	-0.262439	-0.840124	0.678208	1	1	2760	tags=24%, list=14%, signal=28%
KEGG_VEGF_SIGNALING_PATHWAY	KEGG_VEGF_SIGNALING_PATHWAY		76	0.298332	1.22399	0.157371	0.805134	0.994	5790	tags=33%, list=30%, signal=47%					KEGG_PROGESTERONE_MEDIATED_OOCYTE_MATURATION	KEGG_PROGESTERONE_MEDIATED_OOCYTE_MATURATION		85	-0.211844	-0.810642	0.674115	1	1	3542	tags=28%, list=18%, signal=34%
KEGG_RIBOFLAVIN_METABOLISM	KEGG_RIBOFLAVIN_METABOLISM		16	0.412478	1.21164	0.214	0.818743	0.995	5652	tags=44%, list=29%, signal=62%					KEGG_TRYPTOPHAN_METABOLISM	KEGG_TRYPTOPHAN_METABOLISM		39	-0.223901	-0.809582	0.7375	1	1	3242	tags=31%, list=17%, signal=37%
KEGG_REGULATION_OF_AUTOPHAGY	KEGG_REGULATION_OF_AUTOPHAGY		34	0.379374	1.20033	0.230924	0.826892	0.996	7359	tags=50%, list=38%, signal=80%					KEGG_ALANINE_ASPARTATE_AND_GLUTAMATE_METABOLISM	KEGG_ALANINE_ASPARTATE_AND_GLUTAMATE_METABOLISM		30	-0.268032	-0.788195	0.742268	1	1	3557	tags=33%, list=18%, signal=41%
KEGG_GLYCEROLIPID_METABOLISM	KEGG_GLYCEROLIPID_METABOLISM		48	0.340677	1.19928	0.211462	0.807664	0.996	4172	tags=31%, list=21%, signal=40%					KEGG_CYTOSOLIC_DNA_SENSING_PATHWAY	KEGG_CYTOSOLIC_DNA_SENSING_PATHWAY		53	-0.235051	-0.775727	0.744898	1	1	2724	tags=23%, list=14%, signal=26%
KEGG_LYSOSOME	KEGG_LYSOSOME		121	0.386702	1.19584	0.291089	0.795046	0.998	6649	tags=46%, list=34%, signal=70%					KEGG_PHENYLALANINE_METABOLISM	KEGG_PHENYLALANINE_METABOLISM		18	-0.240011	-0.773526	0.869379	1	1	4324	tags=44%, list=22%, signal=57%
KEGG_NEUROTROPHIN_SIGNALING_PATHWAY	KEGG_NEUROTROPHIN_SIGNALING_PATHWAY		125	0.300155	1.18999	0.248927	0.791751	0.999	3592	tags=23%, list=18%, signal=28%					KEGG_SELENOAMINO_ACID_METABOLISM	KEGG_SELENOAMINO_ACID_METABOLISM		25	-0.25875	-0.743679	0.783567	1	1	3584	tags=36%, list=18%, signal=44%
KEGG_ARACHIDONIC_ACID_METABOLISM	KEGG_ARACHIDONIC_ACID_METABOLISM		57	0.332784	1.1839	0.227451	0.787714	0.999	7906	tags=53%, list=41%, signal=88%					KEGG_FRUCTOSE_AND_MANNOSE_METABOLISM	KEGG_FRUCTOSE_AND_MANNOSE_METABOLISM		34	-0.251058	-0.740866	0.755741	1	1	3913	tags=29%, list=20%, signal=37%
KEGG_TGF_BETA_SIGNALING_PATHWAY	KEGG_TGF_BETA_SIGNALING_PATHWAY		85	0.323777	1.18387	0.252546	0.768629	0.999	3699	tags=31%, list=19%, signal=38%					KEGG_GLUTATHIONE_METABOLISM	KEGG_GLUTATHIONE_METABOLISM		47	-0.224719	-0.724324	0.813387	1	1	1307	tags=15%, list=7%, signal=16%
KEGG_JAK_STAT_SIGNALING_PATHWAY	KEGG_JAK_STAT_SIGNALING_PATHWAY		155	0.312313	1.18377	0.224033	0.7505	0.999	6347	tags=43%, list=33%, signal=64%					KEGG_GALACTOSE_METABOLISM	KEGG_GALACTOSE_METABOLISM		26	-0.237248	-0.707062	0.827655	1	1	3913	tags=31%, list=20%, signal=38%
KEGG_NEUROACTIVE_LIGAND_RECEPTOR_INTERACTION	KEGG_NEUROACTIVE_LIGAND_RECEPTOR_INTERACTION		271	0.334497	1.18351	0.270103	0.733642	0.999	6224	tags=39%, list=32%, signal=57%					KEGG_PENTOSE_PHOSPHATE_PATHWAY	KEGG_PENTOSE_PHOSPHATE_PATHWAY		27	-0.236314	-0.679016	0.865306	1	1	628	tags=11%, list=3%, signal=11%
KEGG_CHEMOKINE_SIGNALING_PATHWAY	KEGG_CHEMOKINE_SIGNALING_PATHWAY		187	0.302393	1.18199	0.254	0.719798	0.999	6422	tags=37%, list=33%, signal=55%					KEGG_MISMATCH_REPAIR	KEGG_MISMATCH_REPAIR		23	-0.249849	-0.625873	0.830645	1	1	2991	tags=30%, list=15%, signal=36%
KEGG_SYSTEMIC_LUPUS_ERYTHEMATOSUS	KEGG_SYSTEMIC_LUPUS_ERYTHEMATOSUS		55	0.376488	1.17363	0.309917	0.724228	1	1799	tags=18%, list=9%, signal=20%					KEGG_BUTANOATE_METABOLISM	KEGG_BUTANOATE_METABOLISM		34	-0.206862	-0.618644	0.888211	1	1	4957	tags=38%, list=25%, signal=51%
KEGG_FOCAL_ADHESION	KEGG_FOCAL_ADHESION		199	0.319574	1.16653	0.305556	0.72565	1	6228	tags=38%, list=32%, signal=56%					KEGG_PROPANOATE_METABOLISM	KEGG_PROPANOATE_METABOLISM		32	-0.209214	-0.56633	0.89901	1	1	4414	tags=44%, list=23%, signal=56%
KEGG_PENTOSE_AND_GLUCURONATE_INTERCONVERSIONS	KEGG_PENTOSE_AND_GLUCURONATE_INTERCONVERSIONS		28	0.488815	1.15768	0.325581	0.731644	1	5433	tags=46%, list=28%, signal=64%					KEGG_ANTIGEN_PROCESSING_AND_PRESENTATION	KEGG_ANTIGEN_PROCESSING_AND_PRESENTATION		80	-0.170371	-0.529331	0.935484	1	1	5107	tags=31%, list=26%, signal=42%
KEGG_STEROID_BIOSYNTHESIS	KEGG_STEROID_BIOSYNTHESIS		17	0.483284	1.14925	0.367816	0.73566	1	9473	tags=82%, list=49%, signal=160%					KEGG_BIOSYNTHESIS_OF_UNSATURATED_FATTY_ACIDS	KEGG_BIOSYNTHESIS_OF_UNSATURATED_FATTY_ACIDS		22	-0.158261	-0.487382	0.990177	1	1	4217	tags=32%, list=22%, signal=41%
KEGG_CELL_ADHESION_MOLECULES_CAMS	KEGG_CELL_ADHESION_MOLECULES_CAMS		130	0.323096	1.14873	0.302041	0.721923	1	7385	tags=41%, list=38%, signal=65%					KEGG_PRIMARY_IMMUNODEFICIENCY	KEGG_PRIMARY_IMMUNODEFICIENCY		35	-0.19207	-0.448786	0.928016	1	1	1509	tags=14%, list=8%, signal=15%
KEGG_ALDOSTERONE_REGULATED_SODIUM_REABSORPTION	KEGG_ALDOSTERONE_REGULATED_SODIUM_REABSORPTION		42	0.318853	1.1338	0.272177	0.74153	1	3625	tags=31%, list=19%, signal=38%					KEGG_TYPE_I_DIABETES_MELLITUS	KEGG_TYPE_I_DIABETES_MELLITUS		41	-0.160827	-0.443469	0.96994	1	1	2334	tags=15%, list=12%, signal=17%
KEGG_PATHWAYS_IN_CANCER	KEGG_PATHWAYS_IN_CANCER		325	0.265108	1.1263	0.296451	0.743651	1	4207	tags=26%, list=22%, signal=33%					KEGG_GRAFT_VERSUS_HOST_DISEASE	KEGG_GRAFT_VERSUS_HOST_DISEASE		37	-0.175989	-0.434183	0.947581	1	1	5049	tags=32%, list=26%, signal=44%
KEGG_DRUG_METABOLISM_CYTOCHROME_P450	KEGG_DRUG_METABOLISM_CYTOCHROME_P450		70	0.394367	1.11604	0.351562	0.752849	1	5433	tags=43%, list=28%, signal=59%					KEGG_AUTOIMMUNE_THYROID_DISEASE	KEGG_AUTOIMMUNE_THYROID_DISEASE		50	-0.153665	-0.43387	0.976424	1	1	2334	tags=12%, list=12%, signal=14%
KEGG_LONG_TERM_POTENTIATION	KEGG_LONG_TERM_POTENTIATION		70	0.2971	1.10648	0.354639	0.7598	1	3089	tags=17%, list=16%, signal=20%					KEGG_ALLOGRAFT_REJECTION	KEGG_ALLOGRAFT_REJECTION		35	-0.17353	-0.430667	0.944773	0.988967	1	2334	tags=14%, list=12%, signal=16%
KEGG_N_GLYCAN_BIOSYNTHESIS	KEGG_N_GLYCAN_BIOSYNTHESIS		46	0.357792	1.09011	0.365269	0.782095	1	6626	tags=43%, list=34%, signal=66%
KEGG_PPAR_SIGNALING_PATHWAY	KEGG_PPAR_SIGNALING_PATHWAY		69	0.324703	1.08481	0.333333	0.779458	1	3761	tags=26%, list=19%, signal=32%
KEGG_NOD_LIKE_RECEPTOR_SIGNALING_PATHWAY	KEGG_NOD_LIKE_RECEPTOR_SIGNALING_PATHWAY		62	0.332231	1.08257	0.363454	0.770727	1	6166	tags=42%, list=32%, signal=61%
KEGG_AMYOTROPHIC_LATERAL_SCLEROSIS_ALS	KEGG_AMYOTROPHIC_LATERAL_SCLEROSIS_ALS		52	0.27291	1.08143	0.318271	0.759444	1	1298	tags=10%, list=7%, signal=10%
KEGG_FC_EPSILON_RI_SIGNALING_PATHWAY	KEGG_FC_EPSILON_RI_SIGNALING_PATHWAY		79	0.280048	1.07964	0.314629	0.749859	1	8161	tags=49%, list=42%, signal=85%
KEGG_STARCH_AND_SUCROSE_METABOLISM	KEGG_STARCH_AND_SUCROSE_METABOLISM		51	0.358659	1.07512	0.366089	0.74684	1	5433	tags=35%, list=28%, signal=49%
KEGG_STEROID_HORMONE_BIOSYNTHESIS	KEGG_STEROID_HORMONE_BIOSYNTHESIS		55	0.381986	1.07415	0.39265	0.736141	1	5433	tags=42%, list=28%, signal=58%
KEGG_HEMATOPOIETIC_CELL_LINEAGE	KEGG_HEMATOPOIETIC_CELL_LINEAGE		84	0.336864	1.05503	0.3861	0.766284	1	7307	tags=44%, list=37%, signal=70%
KEGG_ASCORBATE_AND_ALDARATE_METABOLISM	KEGG_ASCORBATE_AND_ALDARATE_METABOLISM		25	0.44792	1.04103	0.443798	0.783918	1	5433	tags=52%, list=28%, signal=72%
KEGG_CHRONIC_MYELOID_LEUKEMIA	KEGG_CHRONIC_MYELOID_LEUKEMIA		73	0.291191	1.03858	0.408805	0.776562	1	7361	tags=47%, list=38%, signal=75%
KEGG_MELANOMA	KEGG_MELANOMA		71	0.265459	1.03506	0.4	0.772034	1	5790	tags=32%, list=30%, signal=46%
KEGG_REGULATION_OF_ACTIN_CYTOSKELETON	KEGG_REGULATION_OF_ACTIN_CYTOSKELETON		212	0.233324	1.0291	0.4	0.772086	1	5790	tags=30%, list=30%, signal=42%
KEGG_SNARE_INTERACTIONS_IN_VESICULAR_TRANSPORT	KEGG_SNARE_INTERACTIONS_IN_VESICULAR_TRANSPORT		38	0.296186	1.02854	0.424658	0.761636	1	8211	tags=58%, list=42%, signal=100%
KEGG_BASAL_CELL_CARCINOMA	KEGG_BASAL_CELL_CARCINOMA		55	0.31279	1.02832	0.421842	0.750699	1	7994	tags=56%, list=41%, signal=95%
KEGG_METABOLISM_OF_XENOBIOTICS_BY_CYTOCHROME_P450	KEGG_METABOLISM_OF_XENOBIOTICS_BY_CYTOCHROME_P450		68	0.364649	1.02495	0.429112	0.746441	1	5433	tags=41%, list=28%, signal=57%
KEGG_INSULIN_SIGNALING_PATHWAY	KEGG_INSULIN_SIGNALING_PATHWAY		137	0.254091	1.01723	0.42562	0.751283	1	3621	tags=22%, list=19%, signal=27%
KEGG_RIG_I_LIKE_RECEPTOR_SIGNALING_PATHWAY	KEGG_RIG_I_LIKE_RECEPTOR_SIGNALING_PATHWAY		70	0.268248	1.01508	0.442387	0.744613	1	6344	tags=34%, list=33%, signal=51%
KEGG_DILATED_CARDIOMYOPATHY	KEGG_DILATED_CARDIOMYOPATHY		90	0.303	1.00975	0.462475	0.74489	1	6069	tags=37%, list=31%, signal=53%
KEGG_PANTOTHENATE_AND_COA_BIOSYNTHESIS	KEGG_PANTOTHENATE_AND_COA_BIOSYNTHESIS		16	0.374763	1.00388	0.464427	0.746743	1	2167	tags=31%, list=11%, signal=35%
KEGG_HISTIDINE_METABOLISM	KEGG_HISTIDINE_METABOLISM		29	0.298329	1.00153	0.458333	0.74086	1	7579	tags=55%, list=39%, signal=90%
KEGG_MAPK_SIGNALING_PATHWAY	KEGG_MAPK_SIGNALING_PATHWAY		267	0.241134	0.998088	0.42161	0.737541	1	6428	tags=34%, list=33%, signal=50%
KEGG_AXON_GUIDANCE	KEGG_AXON_GUIDANCE		129	0.256747	0.982946	0.471429	0.757131	1	5219	tags=26%, list=27%, signal=36%
KEGG_BLADDER_CANCER	KEGG_BLADDER_CANCER		42	0.303483	0.967321	0.475915	0.777321	1	1574	tags=14%, list=8%, signal=16%
KEGG_PROTEIN_EXPORT	KEGG_PROTEIN_EXPORT		23	0.382499	0.966356	0.513462	0.769281	1	568	tags=13%, list=3%, signal=13%
KEGG_LEUKOCYTE_TRANSENDOTHELIAL_MIGRATION	KEGG_LEUKOCYTE_TRANSENDOTHELIAL_MIGRATION		115	0.237314	0.96074	0.494949	0.76995	1	3546	tags=18%, list=18%, signal=22%
KEGG_PORPHYRIN_AND_CHLOROPHYLL_METABOLISM	KEGG_PORPHYRIN_AND_CHLOROPHYLL_METABOLISM		40	0.343168	0.957666	0.506849	0.765413	1	5433	tags=38%, list=28%, signal=52%
KEGG_T_CELL_RECEPTOR_SIGNALING_PATHWAY	KEGG_T_CELL_RECEPTOR_SIGNALING_PATHWAY		108	0.281407	0.956262	0.501027	0.758523	1	7477	tags=46%, list=38%, signal=75%
KEGG_ADHERENS_JUNCTION	KEGG_ADHERENS_JUNCTION		73	0.257028	0.949256	0.544715	0.761358	1	3313	tags=19%, list=17%, signal=23%
KEGG_ALPHA_LINOLENIC_ACID_METABOLISM	KEGG_ALPHA_LINOLENIC_ACID_METABOLISM		19	0.312388	0.948026	0.530364	0.754401	1	5494	tags=37%, list=28%, signal=51%
KEGG_TYPE_II_DIABETES_MELLITUS	KEGG_TYPE_II_DIABETES_MELLITUS		47	0.262757	0.941492	0.540816	0.756428	1	7900	tags=51%, list=41%, signal=86%
KEGG_EPITHELIAL_CELL_SIGNALING_IN_HELICOBACTER_PYLORI_INFECTION	KEGG_EPITHELIAL_CELL_SIGNALING_IN_HELICOBACTER_PYLORI_INFECTION		68	0.256062	0.934989	0.534517	0.75878	1	6186	tags=34%, list=32%, signal=49%
KEGG_HYPERTROPHIC_CARDIOMYOPATHY_HCM	KEGG_HYPERTROPHIC_CARDIOMYOPATHY_HCM		83	0.279628	0.928885	0.559761	0.760225	1	6765	tags=39%, list=35%, signal=59%
KEGG_PEROXISOME	KEGG_PEROXISOME		78	0.295333	0.923811	0.555781	0.760601	1	5282	tags=28%, list=27%, signal=39%
KEGG_TERPENOID_BACKBONE_BIOSYNTHESIS	KEGG_TERPENOID_BACKBONE_BIOSYNTHESIS		15	0.39526	0.91816	0.536862	0.762356	1	5282	tags=33%, list=27%, signal=46%
KEGG_COLORECTAL_CANCER	KEGG_COLORECTAL_CANCER		62	0.242427	0.911386	0.551797	0.766688	1	8845	tags=58%, list=45%, signal=106%
KEGG_RETINOL_METABOLISM	KEGG_RETINOL_METABOLISM		64	0.324829	0.908327	0.580153	0.764027	1	5433	tags=39%, list=28%, signal=54%
KEGG_VIRAL_MYOCARDITIS	KEGG_VIRAL_MYOCARDITIS		68	0.248483	0.882683	0.554865	0.800809	1	5425	tags=25%, list=28%, signal=35%
KEGG_ADIPOCYTOKINE_SIGNALING_PATHWAY	KEGG_ADIPOCYTOKINE_SIGNALING_PATHWAY		67	0.236573	0.882411	0.612121	0.792543	1	8812	tags=60%, list=45%, signal=109%
KEGG_LONG_TERM_DEPRESSION	KEGG_LONG_TERM_DEPRESSION		70	0.223717	0.875791	0.645621	0.795981	1	5494	tags=29%, list=28%, signal=40%
KEGG_SMALL_CELL_LUNG_CANCER	KEGG_SMALL_CELL_LUNG_CANCER		84	0.240878	0.872931	0.614433	0.79248	1	4059	tags=27%, list=21%, signal=34%
KEGG_INOSITOL_PHOSPHATE_METABOLISM	KEGG_INOSITOL_PHOSPHATE_METABOLISM		54	0.250904	0.871635	0.608974	0.786401	1	6423	tags=39%, list=33%, signal=58%
KEGG_TOLL_LIKE_RECEPTOR_SIGNALING_PATHWAY	KEGG_TOLL_LIKE_RECEPTOR_SIGNALING_PATHWAY		101	0.22699	0.869114	0.614314	0.782509	1	6938	tags=40%, list=36%, signal=61%
KEGG_TYROSINE_METABOLISM	KEGG_TYROSINE_METABOLISM		42	0.220965	0.859225	0.739726	0.790795	1	6091	tags=38%, list=31%, signal=55%
KEGG_PANCREATIC_CANCER	KEGG_PANCREATIC_CANCER		70	0.223775	0.852044	0.646694	0.794368	1	8766	tags=51%, list=45%, signal=93%
KEGG_WNT_SIGNALING_PATHWAY	KEGG_WNT_SIGNALING_PATHWAY		150	0.205985	0.848884	0.665289	0.79115	1	7633	tags=39%, list=39%, signal=64%
KEGG_ASTHMA	KEGG_ASTHMA		28	0.332023	0.848122	0.608163	0.784503	1	6347	tags=32%, list=33%, signal=48%
KEGG_ERBB_SIGNALING_PATHWAY	KEGG_ERBB_SIGNALING_PATHWAY		87	0.225447	0.828984	0.639344	0.808486	1	7646	tags=41%, list=39%, signal=68%
KEGG_NON_SMALL_CELL_LUNG_CANCER	KEGG_NON_SMALL_CELL_LUNG_CANCER		54	0.218712	0.808459	0.690763	0.833756	1	3614	tags=19%, list=19%, signal=23%
KEGG_GLYCOSPHINGOLIPID_BIOSYNTHESIS_LACTO_AND_NEOLACTO_SERIES	KEGG_GLYCOSPHINGOLIPID_BIOSYNTHESIS_LACTO_AND_NEOLACTO_SERIES		26	0.256246	0.803851	0.715746	0.832498	1	8546	tags=46%, list=44%, signal=82%
KEGG_FATTY_ACID_METABOLISM	KEGG_FATTY_ACID_METABOLISM		42	0.25969	0.795894	0.687129	0.837089	1	4638	tags=29%, list=24%, signal=37%
KEGG_UBIQUITIN_MEDIATED_PROTEOLYSIS	KEGG_UBIQUITIN_MEDIATED_PROTEOLYSIS		133	0.219779	0.795024	0.697341	0.830324	1	3226	tags=20%, list=17%, signal=23%
KEGG_HEDGEHOG_SIGNALING_PATHWAY	KEGG_HEDGEHOG_SIGNALING_PATHWAY		56	0.233123	0.79392	0.746362	0.824136	1	7994	tags=50%, list=41%, signal=84%
KEGG_PROSTATE_CANCER	KEGG_PROSTATE_CANCER		89	0.206717	0.785613	0.732218	0.829204	1	6228	tags=34%, list=32%, signal=49%
KEGG_LINOLEIC_ACID_METABOLISM	KEGG_LINOLEIC_ACID_METABOLISM		29	0.275269	0.78322	0.761711	0.824808	1	1893	tags=17%, list=10%, signal=19%
KEGG_AMINO_SUGAR_AND_NUCLEOTIDE_SUGAR_METABOLISM	KEGG_AMINO_SUGAR_AND_NUCLEOTIDE_SUGAR_METABOLISM		44	0.26197	0.767801	0.710059	0.84036	1	8729	tags=48%, list=45%, signal=86%
KEGG_DRUG_METABOLISM_OTHER_ENZYMES	KEGG_DRUG_METABOLISM_OTHER_ENZYMES		51	0.25733	0.74496	0.774011	0.866398	1	5760	tags=37%, list=30%, signal=53%
KEGG_NATURAL_KILLER_CELL_MEDIATED_CYTOTOXICITY	KEGG_NATURAL_KILLER_CELL_MEDIATED_CYTOTOXICITY		131	0.195285	0.731429	0.804829	0.878417	1	7416	tags=34%, list=38%, signal=55%
KEGG_TIGHT_JUNCTION	KEGG_TIGHT_JUNCTION		131	0.173451	0.725671	0.90239	0.879435	1	5425	tags=24%, list=28%, signal=33%
KEGG_APOPTOSIS	KEGG_APOPTOSIS		86	0.185588	0.706145	0.87251	0.897872	1	6228	tags=30%, list=32%, signal=44%
KEGG_HOMOLOGOUS_RECOMBINATION	KEGG_HOMOLOGOUS_RECOMBINATION		28	0.261976	0.678411	0.775794	0.92339	1	1442	tags=14%, list=7%, signal=15%
KEGG_NITROGEN_METABOLISM	KEGG_NITROGEN_METABOLISM		23	0.224822	0.676524	0.925926	0.917711	1	5199	tags=30%, list=27%, signal=41%
KEGG_OLFACTORY_TRANSDUCTION	KEGG_OLFACTORY_TRANSDUCTION		371	0.24774	0.672016	0.721311	0.914983	1	8266	tags=43%, list=42%, signal=74%
KEGG_VASOPRESSIN_REGULATED_WATER_REABSORPTION	KEGG_VASOPRESSIN_REGULATED_WATER_REABSORPTION		44	0.188056	0.667693	0.89336	0.912107	1	5980	tags=34%, list=31%, signal=49%
KEGG_ACUTE_MYELOID_LEUKEMIA	KEGG_ACUTE_MYELOID_LEUKEMIA		57	0.187701	0.650615	0.877895	0.923733	1	7395	tags=46%, list=38%, signal=73%
KEGG_ENDOMETRIAL_CANCER	KEGG_ENDOMETRIAL_CANCER		52	0.18722	0.64967	0.862213	0.917014	1	7633	tags=40%, list=39%, signal=66%
KEGG_VIBRIO_CHOLERAE_INFECTION	KEGG_VIBRIO_CHOLERAE_INFECTION		54	0.172549	0.64053	0.926357	0.918766	1	6186	tags=28%, list=32%, signal=41%
KEGG_INTESTINAL_IMMUNE_NETWORK_FOR_IGA_PRODUCTION	KEGG_INTESTINAL_IMMUNE_NETWORK_FOR_IGA_PRODUCTION		46	0.232032	0.628714	0.752941	0.922817	1	7385	tags=35%, list=38%, signal=56%
KEGG_MATURITY_ONSET_DIABETES_OF_THE_YOUNG	KEGG_MATURITY_ONSET_DIABETES_OF_THE_YOUNG		25	0.232502	0.621598	0.891129	0.921823	1	7203	tags=44%, list=37%, signal=70%
KEGG_B_CELL_RECEPTOR_SIGNALING_PATHWAY	KEGG_B_CELL_RECEPTOR_SIGNALING_PATHWAY		75	0.174596	0.569183	0.894094	0.956367	1	6228	tags=28%, list=32%, signal=41%
KEGG_LEISHMANIA_INFECTION	KEGG_LEISHMANIA_INFECTION		68	0.163707	0.523137	0.936128	0.975665	1	5157	tags=24%, list=26%, signal=32%
KEGG_ARRHYTHMOGENIC_RIGHT_VENTRICULAR_CARDIOMYOPATHY_ARVC	KEGG_ARRHYTHMOGENIC_RIGHT_VENTRICULAR_CARDIOMYOPATHY_ARVC		74	0.143652	0.481666	0.983968	0.984335	1	6078	tags=26%, list=31%, signal=37%
KEGG_LYSINE_DEGRADATION	KEGG_LYSINE_DEGRADATION		44	0.158833	0.479579	0.977688	0.977088	1	4706	tags=20%, list=24%, signal=27%

## Sheet: LEF1
HIGH																LOW
NAME	GS<br> follow link to MSigDB	GS DETAILS	SIZE	ES	NES	NOM p-val	FDR q-val	FWER p-val	RANK AT MAX	LEADING EDGE						NAME	GS<br> follow link to MSigDB	GS DETAILS	SIZE	ES	NES	NOM p-val	FDR q-val	FWER p-val	RANK AT MAX	LEADING EDGE
KEGG_BASAL_CELL_CARCINOMA	KEGG_BASAL_CELL_CARCINOMA	Details ...	55	0.564389	1.90909	0.00189753	0.187212	0.089	1546	tags=25%, list=8%, signal=28%						KEGG_PROTEASOME	KEGG_PROTEASOME	Details ...	44	-0.835286	-1.97934	0	0.0370958	0.035	2552	tags=89%, list=13%, signal=102%
KEGG_CALCIUM_SIGNALING_PATHWAY	KEGG_CALCIUM_SIGNALING_PATHWAY	Details ...	177	0.528355	1.90091	0	0.104315	0.104	3764	tags=42%, list=19%, signal=52%						KEGG_PYRIMIDINE_METABOLISM	KEGG_PYRIMIDINE_METABOLISM	Details ...	98	-0.573378	-1.86384	0	0.101049	0.15	2569	tags=45%, list=13%, signal=51%
KEGG_ECM_RECEPTOR_INTERACTION	KEGG_ECM_RECEPTOR_INTERACTION	Details ...	83	0.590452	1.8563	0.0131086	0.125247	0.176	4133	tags=55%, list=21%, signal=70%						KEGG_PENTOSE_PHOSPHATE_PATHWAY	KEGG_PENTOSE_PHOSPHATE_PATHWAY	Details ...	27	-0.630525	-1.82048	0.00578035	0.110223	0.217	4418	tags=59%, list=23%, signal=77%
KEGG_MELANOGENESIS	KEGG_MELANOGENESIS	Details ...	101	0.493347	1.83133	0.00191939	0.125673	0.225	3987	tags=35%, list=20%, signal=43%						KEGG_HUNTINGTONS_DISEASE	KEGG_HUNTINGTONS_DISEASE	Details ...	171	-0.496416	-1.80982	0.00579151	0.0913518	0.234	2783	tags=44%, list=14%, signal=51%
KEGG_CELL_ADHESION_MOLECULES_CAMS	KEGG_CELL_ADHESION_MOLECULES_CAMS	Details ...	130	0.512419	1.82136	0.0078125	0.108712	0.241	3647	tags=38%, list=19%, signal=47%						KEGG_DNA_REPLICATION	KEGG_DNA_REPLICATION	Details ...	36	-0.795255	-1.79197	0.00604839	0.0916187	0.269	2569	tags=72%, list=13%, signal=83%
KEGG_VASCULAR_SMOOTH_MUSCLE_CONTRACTION	KEGG_VASCULAR_SMOOTH_MUSCLE_CONTRACTION	Details ...	115	0.527848	1.78906	0	0.12751	0.304	5681	tags=56%, list=29%, signal=78%						KEGG_RNA_POLYMERASE	KEGG_RNA_POLYMERASE	Details ...	29	-0.621177	-1.78393	0.00809717	0.0836927	0.289	2244	tags=45%, list=12%, signal=51%
KEGG_ARRHYTHMOGENIC_RIGHT_VENTRICULAR_CARDIOMYOPATHY_ARVC	KEGG_ARRHYTHMOGENIC_RIGHT_VENTRICULAR_CARDIOMYOPATHY_ARVC	Details ...	74	0.543996	1.78506	0.00779727	0.113347	0.311	2284	tags=36%, list=12%, signal=41%						KEGG_SPLICEOSOME	KEGG_SPLICEOSOME	Details ...	126	-0.613663	-1.72531	0.0252918	0.126744	0.433	4050	tags=62%, list=21%, signal=78%
KEGG_HEMATOPOIETIC_CELL_LINEAGE	KEGG_HEMATOPOIETIC_CELL_LINEAGE	Details ...	84	0.570429	1.78229	0.0144928	0.101384	0.317	3556	tags=42%, list=18%, signal=51%						KEGG_OXIDATIVE_PHOSPHORYLATION	KEGG_OXIDATIVE_PHOSPHORYLATION	Details ...	116	-0.606547	-1.71989	0.0383877	0.114909	0.447	3459	tags=59%, list=18%, signal=71%
KEGG_GLYCOSPHINGOLIPID_BIOSYNTHESIS_GANGLIO_SERIES	KEGG_GLYCOSPHINGOLIPID_BIOSYNTHESIS_GANGLIO_SERIES	Details ...	15	0.629846	1.75791	0.0130354	0.111224	0.37	2067	tags=33%, list=11%, signal=37%						KEGG_BASE_EXCISION_REPAIR	KEGG_BASE_EXCISION_REPAIR	Details ...	33	-0.671709	-1.71826	0.0120968	0.103839	0.449	4413	tags=73%, list=23%, signal=94%
KEGG_HEDGEHOG_SIGNALING_PATHWAY	KEGG_HEDGEHOG_SIGNALING_PATHWAY	Details ...	56	0.513987	1.73223	0.00798403	0.124456	0.431	2655	tags=27%, list=14%, signal=31%						KEGG_MISMATCH_REPAIR	KEGG_MISMATCH_REPAIR	Details ...	23	-0.708874	-1.67072	0.0301205	0.135522	0.554	2300	tags=52%, list=12%, signal=59%
KEGG_DILATED_CARDIOMYOPATHY	KEGG_DILATED_CARDIOMYOPATHY	Details ...	90	0.525677	1.69756	0.00821355	0.156375	0.518	3652	tags=42%, list=19%, signal=52%						KEGG_ALZHEIMERS_DISEASE	KEGG_ALZHEIMERS_DISEASE	Details ...	157	-0.46351	-1.66336	0.03861	0.129414	0.57	2700	tags=43%, list=14%, signal=50%
KEGG_CYTOKINE_CYTOKINE_RECEPTOR_INTERACTION	KEGG_CYTOKINE_CYTOKINE_RECEPTOR_INTERACTION	Details ...	262	0.421583	1.6653	0.00788955	0.188484	0.605	4422	tags=34%, list=23%, signal=43%						KEGG_PARKINSONS_DISEASE	KEGG_PARKINSONS_DISEASE	Details ...	113	-0.5396	-1.649	0.0479846	0.132544	0.602	2700	tags=53%, list=14%, signal=61%
KEGG_NEUROACTIVE_LIGAND_RECEPTOR_INTERACTION	KEGG_NEUROACTIVE_LIGAND_RECEPTOR_INTERACTION	Details ...	271	0.500465	1.64889	0.00596422	0.19763	0.648	7021	tags=62%, list=36%, signal=96%						KEGG_TERPENOID_BACKBONE_BIOSYNTHESIS	KEGG_TERPENOID_BACKBONE_BIOSYNTHESIS	Details ...	15	-0.702577	-1.60789	0.0567951	0.166186	0.698	1542	tags=47%, list=8%, signal=51%
KEGG_FOCAL_ADHESION	KEGG_FOCAL_ADHESION	Details ...	199	0.450348	1.61685	0.042065	0.233327	0.713	4133	tags=40%, list=21%, signal=50%						KEGG_STEROID_BIOSYNTHESIS	KEGG_STEROID_BIOSYNTHESIS	Details ...	17	-0.709376	-1.57692	0.0680412	0.191918	0.763	2707	tags=59%, list=14%, signal=68%
KEGG_HYPERTROPHIC_CARDIOMYOPATHY_HCM	KEGG_HYPERTROPHIC_CARDIOMYOPATHY_HCM	Details ...	83	0.491958	1.61067	0.0200803	0.227236	0.724	6031	tags=55%, list=31%, signal=80%						KEGG_NUCLEOTIDE_EXCISION_REPAIR	KEGG_NUCLEOTIDE_EXCISION_REPAIR	Details ...	44	-0.562533	-1.57194	0.0734694	0.184736	0.774	2300	tags=41%, list=12%, signal=46%
KEGG_AXON_GUIDANCE	KEGG_AXON_GUIDANCE	Details ...	129	0.416083	1.58175	0.0265655	0.257812	0.774	3744	tags=33%, list=19%, signal=41%						KEGG_PROTEIN_EXPORT	KEGG_PROTEIN_EXPORT	Details ...	23	-0.642083	-1.55377	0.0635246	0.194364	0.8	3527	tags=61%, list=18%, signal=74%
KEGG_PRIMARY_BILE_ACID_BIOSYNTHESIS	KEGG_PRIMARY_BILE_ACID_BIOSYNTHESIS	Details ...	16	0.566775	1.5807	0.0244399	0.244367	0.778	2301	tags=38%, list=12%, signal=42%						KEGG_CITRATE_CYCLE_TCA_CYCLE	KEGG_CITRATE_CYCLE_TCA_CYCLE	Details ...	30	-0.570802	-1.55154	0.0803059	0.185705	0.803	3996	tags=50%, list=20%, signal=63%
KEGG_LEUKOCYTE_TRANSENDOTHELIAL_MIGRATION	KEGG_LEUKOCYTE_TRANSENDOTHELIAL_MIGRATION	Details ...	115	0.414991	1.57947	0.0290135	0.232517	0.782	4806	tags=39%, list=25%, signal=52%						KEGG_CELL_CYCLE	KEGG_CELL_CYCLE	Details ...	124	-0.50127	-1.53941	0.0912863	0.189856	0.82	3554	tags=52%, list=18%, signal=63%
KEGG_ARACHIDONIC_ACID_METABOLISM	KEGG_ARACHIDONIC_ACID_METABOLISM	Details ...	57	0.451309	1.57157	0.0292969	0.233193	0.8	4193	tags=33%, list=21%, signal=42%						KEGG_GLYOXYLATE_AND_DICARBOXYLATE_METABOLISM	KEGG_GLYOXYLATE_AND_DICARBOXYLATE_METABOLISM	Details ...	16	-0.627706	-1.53015	0.0532544	0.190534	0.839	5511	tags=69%, list=28%, signal=96%
KEGG_GLYCOSAMINOGLYCAN_BIOSYNTHESIS_CHONDROITIN_SULFATE	KEGG_GLYCOSAMINOGLYCAN_BIOSYNTHESIS_CHONDROITIN_SULFATE	Details ...	22	0.570104	1.56809	0.0584906	0.227198	0.806	4102	tags=55%, list=21%, signal=69%						KEGG_HOMOLOGOUS_RECOMBINATION	KEGG_HOMOLOGOUS_RECOMBINATION	Details ...	28	-0.599679	-1.52059	0.0829959	0.192629	0.856	1812	tags=36%, list=9%, signal=39%
KEGG_LONG_TERM_DEPRESSION	KEGG_LONG_TERM_DEPRESSION		70	0.422254	1.5418	0.0283554	0.25769	0.844	5681	tags=46%, list=29%, signal=64%						KEGG_PORPHYRIN_AND_CHLOROPHYLL_METABOLISM	KEGG_PORPHYRIN_AND_CHLOROPHYLL_METABOLISM		40	-0.501733	-1.51038	0.0696325	0.19436	0.869	5245	tags=55%, list=27%, signal=75%
KEGG_GAP_JUNCTION	KEGG_GAP_JUNCTION		89	0.420277	1.53968	0.0384615	0.249377	0.845	5699	tags=51%, list=29%, signal=71%						KEGG_AMINOACYL_TRNA_BIOSYNTHESIS	KEGG_AMINOACYL_TRNA_BIOSYNTHESIS		22	-0.617541	-1.49922	0.0927419	0.197302	0.879	4335	tags=59%, list=22%, signal=76%
KEGG_MAPK_SIGNALING_PATHWAY	KEGG_MAPK_SIGNALING_PATHWAY		267	0.380498	1.53863	0.0116279	0.23992	0.847	5699	tags=38%, list=29%, signal=53%						KEGG_GLUTATHIONE_METABOLISM	KEGG_GLUTATHIONE_METABOLISM		47	-0.438702	-1.42733	0.0710059	0.277361	0.952	2906	tags=47%, list=15%, signal=55%
KEGG_COMPLEMENT_AND_COAGULATION_CASCADES	KEGG_COMPLEMENT_AND_COAGULATION_CASCADES		69	0.457042	1.52889	0.0688336	0.242577	0.861	3686	tags=33%, list=19%, signal=41%						KEGG_FRUCTOSE_AND_MANNOSE_METABOLISM	KEGG_FRUCTOSE_AND_MANNOSE_METABOLISM		34	-0.482001	-1.4152	0.135294	0.281653	0.953	4106	tags=44%, list=21%, signal=56%
KEGG_CHEMOKINE_SIGNALING_PATHWAY	KEGG_CHEMOKINE_SIGNALING_PATHWAY		187	0.400252	1.50678	0.0647773	0.265069	0.886	3744	tags=31%, list=19%, signal=38%						KEGG_ONE_CARBON_POOL_BY_FOLATE	KEGG_ONE_CARBON_POOL_BY_FOLATE		17	-0.544106	-1.37903	0.172619	0.322057	0.971	3034	tags=53%, list=16%, signal=63%
KEGG_WNT_SIGNALING_PATHWAY	KEGG_WNT_SIGNALING_PATHWAY		150	0.383174	1.50271	0.0380228	0.261407	0.891	5749	tags=39%, list=29%, signal=54%						KEGG_CYSTEINE_AND_METHIONINE_METABOLISM	KEGG_CYSTEINE_AND_METHIONINE_METABOLISM		34	-0.421243	-1.36571	0.0790514	0.329153	0.977	3860	tags=50%, list=20%, signal=62%
KEGG_MELANOMA	KEGG_MELANOMA		71	0.396785	1.50095	0.0506823	0.254479	0.891	2692	tags=25%, list=14%, signal=29%						KEGG_RNA_DEGRADATION	KEGG_RNA_DEGRADATION		57	-0.461077	-1.33785	0.2	0.360585	0.984	3832	tags=46%, list=20%, signal=57%
KEGG_ABC_TRANSPORTERS	KEGG_ABC_TRANSPORTERS		44	0.468711	1.48275	0.0433145	0.272977	0.905	3894	tags=32%, list=20%, signal=40%						KEGG_VIBRIO_CHOLERAE_INFECTION	KEGG_VIBRIO_CHOLERAE_INFECTION		54	-0.317757	-1.25315	0.15415	0.486725	0.994	3115	tags=33%, list=16%, signal=40%
KEGG_JAK_STAT_SIGNALING_PATHWAY	KEGG_JAK_STAT_SIGNALING_PATHWAY		155	0.385364	1.47234	0.0414201	0.278068	0.913	7233	tags=49%, list=37%, signal=77%						KEGG_PENTOSE_AND_GLUCURONATE_INTERCONVERSIONS	KEGG_PENTOSE_AND_GLUCURONATE_INTERCONVERSIONS		28	-0.485662	-1.24675	0.265432	0.480922	0.994	5245	tags=54%, list=27%, signal=73%
KEGG_ALDOSTERONE_REGULATED_SODIUM_REABSORPTION	KEGG_ALDOSTERONE_REGULATED_SODIUM_REABSORPTION		42	0.4001	1.45898	0.0397614	0.289735	0.922	5689	tags=40%, list=29%, signal=57%						KEGG_RIBOSOME	KEGG_RIBOSOME		87	-0.542344	-1.2418	0.307839	0.472594	0.994	6617	tags=67%, list=34%, signal=100%
KEGG_TGF_BETA_SIGNALING_PATHWAY	KEGG_TGF_BETA_SIGNALING_PATHWAY		85	0.406014	1.45825	0.0848708	0.281388	0.922	5567	tags=49%, list=29%, signal=69%						KEGG_DRUG_METABOLISM_OTHER_ENZYMES	KEGG_DRUG_METABOLISM_OTHER_ENZYMES		51	-0.405339	-1.23066	0.205703	0.475828	0.995	5245	tags=53%, list=27%, signal=72%
KEGG_ADHERENS_JUNCTION	KEGG_ADHERENS_JUNCTION		73	0.385616	1.45758	0.0628571	0.273429	0.923	3144	tags=26%, list=16%, signal=31%						KEGG_GLYCOLYSIS_GLUCONEOGENESIS	KEGG_GLYCOLYSIS_GLUCONEOGENESIS		61	-0.349248	-1.19815	0.25355	0.516945	0.998	4418	tags=41%, list=23%, signal=53%
KEGG_ACUTE_MYELOID_LEUKEMIA	KEGG_ACUTE_MYELOID_LEUKEMIA		57	0.425717	1.4564	0.0925553	0.266926	0.925	2541	tags=25%, list=13%, signal=28%						KEGG_PYRUVATE_METABOLISM	KEGG_PYRUVATE_METABOLISM		40	-0.352704	-1.18136	0.257028	0.532053	0.999	3621	tags=38%, list=19%, signal=46%
KEGG_ETHER_LIPID_METABOLISM	KEGG_ETHER_LIPID_METABOLISM		33	0.420223	1.44496	0.0583658	0.275178	0.931	3928	tags=36%, list=20%, signal=45%						KEGG_PURINE_METABOLISM	KEGG_PURINE_METABOLISM		157	-0.261966	-1.15807	0.239837	0.557918	0.999	3016	tags=32%, list=15%, signal=37%
KEGG_REGULATION_OF_ACTIN_CYTOSKELETON	KEGG_REGULATION_OF_ACTIN_CYTOSKELETON		212	0.351869	1.44191	0.0622642	0.271126	0.933	4089	tags=32%, list=21%, signal=40%						KEGG_ALANINE_ASPARTATE_AND_GLUTAMATE_METABOLISM	KEGG_ALANINE_ASPARTATE_AND_GLUTAMATE_METABOLISM		30	-0.380351	-1.15731	0.303675	0.543274	0.999	5526	tags=57%, list=28%, signal=79%
KEGG_NEUROTROPHIN_SIGNALING_PATHWAY	KEGG_NEUROTROPHIN_SIGNALING_PATHWAY		125	0.372265	1.4266	0.0722656	0.285857	0.948	3983	tags=30%, list=20%, signal=37%						KEGG_BLADDER_CANCER	KEGG_BLADDER_CANCER		42	-0.347257	-1.157	0.280561	0.52873	0.999	2960	tags=38%, list=15%, signal=45%
KEGG_PROSTATE_CANCER	KEGG_PROSTATE_CANCER		89	0.369105	1.42522	0.0823755	0.280089	0.948	2526	tags=21%, list=13%, signal=24%						KEGG_PATHOGENIC_ESCHERICHIA_COLI_INFECTION	KEGG_PATHOGENIC_ESCHERICHIA_COLI_INFECTION		55	-0.295145	-1.14284	0.259406	0.538577	0.999	2527	tags=31%, list=13%, signal=35%
KEGG_COLORECTAL_CANCER	KEGG_COLORECTAL_CANCER		62	0.388741	1.4225	0.0863039	0.275789	0.95	1281	tags=16%, list=7%, signal=17%						KEGG_RIBOFLAVIN_METABOLISM	KEGG_RIBOFLAVIN_METABOLISM		16	-0.381554	-1.14152	0.289641	0.526526	1	3519	tags=38%, list=18%, signal=46%
KEGG_PATHWAYS_IN_CANCER	KEGG_PATHWAYS_IN_CANCER		325	0.343994	1.41607	0.0717054	0.27728	0.956	4564	tags=31%, list=23%, signal=40%						KEGG_BUTANOATE_METABOLISM	KEGG_BUTANOATE_METABOLISM		34	-0.356037	-1.11902	0.31992	0.549803	1	4502	tags=41%, list=23%, signal=53%
KEGG_PHOSPHATIDYLINOSITOL_SIGNALING_SYSTEM	KEGG_PHOSPHATIDYLINOSITOL_SIGNALING_SYSTEM		76	0.414626	1.39047	0.110672	0.305872	0.966	6925	tags=58%, list=36%, signal=89%						KEGG_BASAL_TRANSCRIPTION_FACTORS	KEGG_BASAL_TRANSCRIPTION_FACTORS		35	-0.354138	-1.10746	0.358871	0.555015	1	4135	tags=46%, list=21%, signal=58%
KEGG_GNRH_SIGNALING_PATHWAY	KEGG_GNRH_SIGNALING_PATHWAY		101	0.361752	1.37448	0.0783133	0.32094	0.971	5699	tags=40%, list=29%, signal=56%						KEGG_VALINE_LEUCINE_AND_ISOLEUCINE_DEGRADATION	KEGG_VALINE_LEUCINE_AND_ISOLEUCINE_DEGRADATION		44	-0.366698	-1.10205	0.372233	0.550552	1	4163	tags=39%, list=21%, signal=49%
KEGG_GLYCOSAMINOGLYCAN_BIOSYNTHESIS_HEPARAN_SULFATE	KEGG_GLYCOSAMINOGLYCAN_BIOSYNTHESIS_HEPARAN_SULFATE		26	0.453808	1.36631	0.120229	0.3254	0.974	5889	tags=46%, list=30%, signal=66%						KEGG_P53_SIGNALING_PATHWAY	KEGG_P53_SIGNALING_PATHWAY		68	-0.313334	-1.0561	0.413721	0.61366	1	4539	tags=46%, list=23%, signal=59%
KEGG_DORSO_VENTRAL_AXIS_FORMATION	KEGG_DORSO_VENTRAL_AXIS_FORMATION		24	0.45287	1.36443	0.110656	0.321089	0.976	3577	tags=38%, list=18%, signal=46%						KEGG_N_GLYCAN_BIOSYNTHESIS	KEGG_N_GLYCAN_BIOSYNTHESIS		46	-0.351238	-1.04227	0.426471	0.623717	1	2238	tags=28%, list=11%, signal=32%
KEGG_ADIPOCYTOKINE_SIGNALING_PATHWAY	KEGG_ADIPOCYTOKINE_SIGNALING_PATHWAY		67	0.388639	1.36114	0.114919	0.318245	0.976	6253	tags=42%, list=32%, signal=61%						KEGG_GLYCOSYLPHOSPHATIDYLINOSITOL_GPI_ANCHOR_BIOSYNTHESIS	KEGG_GLYCOSYLPHOSPHATIDYLINOSITOL_GPI_ANCHOR_BIOSYNTHESIS		24	-0.382812	-1.03202	0.458678	0.626595	1	3275	tags=42%, list=17%, signal=50%
KEGG_THYROID_CANCER	KEGG_THYROID_CANCER		29	0.408695	1.33941	0.12476	0.342838	0.983	750	tags=17%, list=4%, signal=18%						KEGG_SELENOAMINO_ACID_METABOLISM	KEGG_SELENOAMINO_ACID_METABOLISM		25	-0.336502	-1.02718	0.445714	0.620417	1	4073	tags=52%, list=21%, signal=66%
KEGG_RENAL_CELL_CARCINOMA	KEGG_RENAL_CELL_CARCINOMA		70	0.360155	1.32935	0.153846	0.349718	0.986	2745	tags=27%, list=14%, signal=31%						KEGG_OOCYTE_MEIOSIS	KEGG_OOCYTE_MEIOSIS		112	-0.283717	-1.02319	0.426778	0.61351	1	3404	tags=37%, list=17%, signal=44%
KEGG_ENDOMETRIAL_CANCER	KEGG_ENDOMETRIAL_CANCER		52	0.37249	1.31099	0.16185	0.368881	0.991	2526	tags=21%, list=13%, signal=24%						KEGG_MATURITY_ONSET_DIABETES_OF_THE_YOUNG	KEGG_MATURITY_ONSET_DIABETES_OF_THE_YOUNG		25	-0.351302	-0.998365	0.423301	0.641206	1	5048	tags=44%, list=26%, signal=59%
KEGG_INTESTINAL_IMMUNE_NETWORK_FOR_IGA_PRODUCTION	KEGG_INTESTINAL_IMMUNE_NETWORK_FOR_IGA_PRODUCTION		46	0.501869	1.31014	0.220374	0.362608	0.991	5920	tags=48%, list=30%, signal=69%						KEGG_CARDIAC_MUSCLE_CONTRACTION	KEGG_CARDIAC_MUSCLE_CONTRACTION		73	-0.275636	-0.977134	0.483685	0.663277	1	2771	tags=33%, list=14%, signal=38%
KEGG_FC_EPSILON_RI_SIGNALING_PATHWAY	KEGG_FC_EPSILON_RI_SIGNALING_PATHWAY		79	0.351139	1.3097	0.142578	0.355641	0.991	6287	tags=44%, list=32%, signal=65%						KEGG_PANTOTHENATE_AND_COA_BIOSYNTHESIS	KEGG_PANTOTHENATE_AND_COA_BIOSYNTHESIS		16	-0.328143	-0.95929	0.50503	0.679689	1	2458	tags=25%, list=13%, signal=29%
KEGG_LONG_TERM_POTENTIATION	KEGG_LONG_TERM_POTENTIATION		70	0.374732	1.30833	0.143149	0.350532	0.991	6182	tags=49%, list=32%, signal=71%						KEGG_ASCORBATE_AND_ALDARATE_METABOLISM	KEGG_ASCORBATE_AND_ALDARATE_METABOLISM		25	-0.378879	-0.940636	0.546778	0.696616	1	7153	tags=72%, list=37%, signal=114%
KEGG_MTOR_SIGNALING_PATHWAY	KEGG_MTOR_SIGNALING_PATHWAY		51	0.37212	1.28861	0.1917	0.371565	0.993	3813	tags=35%, list=20%, signal=44%						KEGG_ARGININE_AND_PROLINE_METABOLISM	KEGG_ARGININE_AND_PROLINE_METABOLISM		54	-0.258125	-0.926293	0.549098	0.706293	1	5264	tags=50%, list=27%, signal=68%
KEGG_TYROSINE_METABOLISM	KEGG_TYROSINE_METABOLISM		42	0.311031	1.23054	0.130268	0.453253	0.995	2454	tags=21%, list=13%, signal=24%						KEGG_PHENYLALANINE_METABOLISM	KEGG_PHENYLALANINE_METABOLISM		18	-0.260506	-0.901849	0.660532	0.734543	1	1129	tags=22%, list=6%, signal=24%
KEGG_TYPE_II_DIABETES_MELLITUS	KEGG_TYPE_II_DIABETES_MELLITUS		47	0.346288	1.22697	0.206963	0.449565	0.995	2707	tags=21%, list=14%, signal=25%						KEGG_ANTIGEN_PROCESSING_AND_PRESENTATION	KEGG_ANTIGEN_PROCESSING_AND_PRESENTATION		80	-0.274575	-0.892717	0.559761	0.73549	1	1834	tags=16%, list=9%, signal=18%
KEGG_ASTHMA	KEGG_ASTHMA		28	0.488665	1.20773	0.280561	0.472482	0.995	7451	tags=54%, list=38%, signal=87%						KEGG_PEROXISOME	KEGG_PEROXISOME		78	-0.276811	-0.884995	0.583162	0.73404	1	3230	tags=26%, list=17%, signal=31%
KEGG_T_CELL_RECEPTOR_SIGNALING_PATHWAY	KEGG_T_CELL_RECEPTOR_SIGNALING_PATHWAY		108	0.354401	1.2074	0.261317	0.464436	0.995	6208	tags=46%, list=32%, signal=68%						KEGG_AMINO_SUGAR_AND_NUCLEOTIDE_SUGAR_METABOLISM	KEGG_AMINO_SUGAR_AND_NUCLEOTIDE_SUGAR_METABOLISM		44	-0.261861	-0.848055	0.620123	0.781096	1	5635	tags=52%, list=29%, signal=73%
KEGG_VEGF_SIGNALING_PATHWAY	KEGG_VEGF_SIGNALING_PATHWAY		76	0.302546	1.19377	0.233463	0.478574	0.996	4950	tags=32%, list=25%, signal=42%						KEGG_LYSINE_DEGRADATION	KEGG_LYSINE_DEGRADATION		44	-0.260559	-0.836228	0.621339	0.786481	1	2768	tags=25%, list=14%, signal=29%
KEGG_FC_GAMMA_R_MEDIATED_PHAGOCYTOSIS	KEGG_FC_GAMMA_R_MEDIATED_PHAGOCYTOSIS		95	0.327603	1.18669	0.281437	0.481629	0.996	4029	tags=27%, list=21%, signal=34%						KEGG_UBIQUITIN_MEDIATED_PROTEOLYSIS	KEGG_UBIQUITIN_MEDIATED_PROTEOLYSIS		133	-0.230614	-0.832587	0.623431	0.778576	1	3479	tags=27%, list=18%, signal=33%
KEGG_TASTE_TRANSDUCTION	KEGG_TASTE_TRANSDUCTION		51	0.407768	1.17649	0.314	0.489363	0.997	7428	tags=51%, list=38%, signal=82%						KEGG_METABOLISM_OF_XENOBIOTICS_BY_CYTOCHROME_P450	KEGG_METABOLISM_OF_XENOBIOTICS_BY_CYTOCHROME_P450		68	-0.275682	-0.809175	0.653768	0.802074	1	5245	tags=47%, list=27%, signal=64%
KEGG_GLIOMA	KEGG_GLIOMA		65	0.329245	1.1737	0.253465	0.485347	0.997	3588	tags=26%, list=18%, signal=32%						KEGG_NITROGEN_METABOLISM	KEGG_NITROGEN_METABOLISM		23	-0.251879	-0.773361	0.811508	0.843971	1	5917	tags=57%, list=30%, signal=81%
KEGG_TIGHT_JUNCTION	KEGG_TIGHT_JUNCTION		131	0.281881	1.15098	0.268627	0.513507	0.998	2161	tags=17%, list=11%, signal=19%						KEGG_GLYCINE_SERINE_AND_THREONINE_METABOLISM	KEGG_GLYCINE_SERINE_AND_THREONINE_METABOLISM		31	-0.23509	-0.764699	0.772901	0.843049	1	1649	tags=19%, list=8%, signal=21%
KEGG_APOPTOSIS	KEGG_APOPTOSIS		86	0.316035	1.14821	0.275794	0.509823	0.998	1281	tags=15%, list=7%, signal=16%						KEGG_BIOSYNTHESIS_OF_UNSATURATED_FATTY_ACIDS	KEGG_BIOSYNTHESIS_OF_UNSATURATED_FATTY_ACIDS		22	-0.253425	-0.746892	0.728745	0.856055	1	3667	tags=36%, list=19%, signal=45%
KEGG_TRYPTOPHAN_METABOLISM	KEGG_TRYPTOPHAN_METABOLISM		39	0.315886	1.14511	0.260618	0.506792	0.999	5731	tags=31%, list=29%, signal=43%						KEGG_NOTCH_SIGNALING_PATHWAY	KEGG_NOTCH_SIGNALING_PATHWAY		47	-0.202874	-0.688509	0.834343	0.921465	1	3619	tags=32%, list=19%, signal=39%
KEGG_TOLL_LIKE_RECEPTOR_SIGNALING_PATHWAY	KEGG_TOLL_LIKE_RECEPTOR_SIGNALING_PATHWAY		101	0.302533	1.14187	0.295775	0.503446	0.999	5434	tags=31%, list=28%, signal=42%						KEGG_GALACTOSE_METABOLISM	KEGG_GALACTOSE_METABOLISM		26	-0.212677	-0.665489	0.899598	0.935561	1	3258	tags=23%, list=17%, signal=28%
KEGG_LEISHMANIA_INFECTION	KEGG_LEISHMANIA_INFECTION		68	0.346812	1.12274	0.351562	0.525802	0.999	5708	tags=32%, list=29%, signal=46%						KEGG_RETINOL_METABOLISM	KEGG_RETINOL_METABOLISM		64	-0.225601	-0.650255	0.859127	0.93772	1	5609	tags=44%, list=29%, signal=61%
KEGG_INSULIN_SIGNALING_PATHWAY	KEGG_INSULIN_SIGNALING_PATHWAY		137	0.280384	1.11102	0.337864	0.536602	0.999	3660	tags=22%, list=19%, signal=27%						KEGG_CYTOSOLIC_DNA_SENSING_PATHWAY	KEGG_CYTOSOLIC_DNA_SENSING_PATHWAY		53	-0.188323	-0.643546	0.904854	0.930739	1	2244	tags=13%, list=12%, signal=15%
KEGG_ALPHA_LINOLENIC_ACID_METABOLISM	KEGG_ALPHA_LINOLENIC_ACID_METABOLISM		19	0.366409	1.11002	0.325142	0.530282	0.999	4950	tags=32%, list=25%, signal=42%						KEGG_GLYCOSPHINGOLIPID_BIOSYNTHESIS_LACTO_AND_NEOLACTO_SERIES	KEGG_GLYCOSPHINGOLIPID_BIOSYNTHESIS_LACTO_AND_NEOLACTO_SERIES		26	-0.196019	-0.639755	0.917695	0.920578	1	3499	tags=27%, list=18%, signal=33%
KEGG_ERBB_SIGNALING_PATHWAY	KEGG_ERBB_SIGNALING_PATHWAY		87	0.300672	1.09959	0.321154	0.539887	1	2526	tags=21%, list=13%, signal=24%						KEGG_GLYCOSAMINOGLYCAN_BIOSYNTHESIS_KERATAN_SULFATE	KEGG_GLYCOSAMINOGLYCAN_BIOSYNTHESIS_KERATAN_SULFATE		15	-0.217189	-0.593214	0.94683	0.94825	1	1077	tags=13%, list=6%, signal=14%
KEGG_NATURAL_KILLER_CELL_MEDIATED_CYTOTOXICITY	KEGG_NATURAL_KILLER_CELL_MEDIATED_CYTOTOXICITY		131	0.276476	1.09046	0.352577	0.546785	1	5699	tags=29%, list=29%, signal=41%						KEGG_OTHER_GLYCAN_DEGRADATION	KEGG_OTHER_GLYCAN_DEGRADATION		16	-0.23374	-0.592169	0.865424	0.935133	1	6325	tags=44%, list=32%, signal=65%
KEGG_PPAR_SIGNALING_PATHWAY	KEGG_PPAR_SIGNALING_PATHWAY		69	0.326087	1.08231	0.358238	0.551549	1	6233	tags=43%, list=32%, signal=64%						KEGG_LYSOSOME	KEGG_LYSOSOME		121	-0.120186	-0.408573	0.991597	0.993294	1	5292	tags=31%, list=27%, signal=43%
KEGG_INOSITOL_PHOSPHATE_METABOLISM	KEGG_INOSITOL_PHOSPHATE_METABOLISM		54	0.317943	1.07271	0.410959	0.559555	1	4846	tags=35%, list=25%, signal=47%
KEGG_AUTOIMMUNE_THYROID_DISEASE	KEGG_AUTOIMMUNE_THYROID_DISEASE		50	0.37572	1.06834	0.386179	0.558783	1	8569	tags=50%, list=44%, signal=89%
KEGG_NICOTINATE_AND_NICOTINAMIDE_METABOLISM	KEGG_NICOTINATE_AND_NICOTINAMIDE_METABOLISM		24	0.304717	1.06637	0.355263	0.554202	1	5645	tags=42%, list=29%, signal=59%
KEGG_VIRAL_MYOCARDITIS	KEGG_VIRAL_MYOCARDITIS		68	0.303018	1.05362	0.388998	0.565735	1	3884	tags=24%, list=20%, signal=29%
KEGG_ENDOCYTOSIS	KEGG_ENDOCYTOSIS		181	0.26241	1.05347	0.37594	0.5583	1	4886	tags=31%, list=25%, signal=42%
KEGG_PROGESTERONE_MEDIATED_OOCYTE_MATURATION	KEGG_PROGESTERONE_MEDIATED_OOCYTE_MATURATION		85	0.283713	1.04409	0.412214	0.565734	1	2076	tags=20%, list=11%, signal=22%
KEGG_B_CELL_RECEPTOR_SIGNALING_PATHWAY	KEGG_B_CELL_RECEPTOR_SIGNALING_PATHWAY		75	0.328681	1.04374	0.418651	0.558929	1	6208	tags=40%, list=32%, signal=58%
KEGG_SYSTEMIC_LUPUS_ERYTHEMATOSUS	KEGG_SYSTEMIC_LUPUS_ERYTHEMATOSUS		55	0.343137	1.04203	0.410058	0.554057	1	5465	tags=35%, list=28%, signal=48%
KEGG_HISTIDINE_METABOLISM	KEGG_HISTIDINE_METABOLISM		29	0.303665	1.03297	0.418426	0.56097	1	4665	tags=28%, list=24%, signal=36%
KEGG_VASOPRESSIN_REGULATED_WATER_REABSORPTION	KEGG_VASOPRESSIN_REGULATED_WATER_REABSORPTION		44	0.285962	1.02793	0.4	0.561194	1	6443	tags=34%, list=33%, signal=51%
KEGG_GLYCEROLIPID_METABOLISM	KEGG_GLYCEROLIPID_METABOLISM		48	0.290257	1.01161	0.428023	0.577897	1	2601	tags=17%, list=13%, signal=19%
KEGG_TYPE_I_DIABETES_MELLITUS	KEGG_TYPE_I_DIABETES_MELLITUS		41	0.350554	0.998249	0.464286	0.590739	1	2379	tags=15%, list=12%, signal=17%
KEGG_PRION_DISEASES	KEGG_PRION_DISEASES		35	0.297554	0.983543	0.482283	0.605552	1	3554	tags=23%, list=18%, signal=28%
KEGG_OLFACTORY_TRANSDUCTION	KEGG_OLFACTORY_TRANSDUCTION		371	0.372541	0.981999	0.506148	0.600425	1	9829	tags=66%, list=50%, signal=130%
KEGG_O_GLYCAN_BIOSYNTHESIS	KEGG_O_GLYCAN_BIOSYNTHESIS		30	0.312014	0.973003	0.512621	0.606503	1	3113	tags=17%, list=16%, signal=20%
KEGG_SMALL_CELL_LUNG_CANCER	KEGG_SMALL_CELL_LUNG_CANCER		84	0.275088	0.971762	0.525692	0.601439	1	5400	tags=37%, list=28%, signal=51%
KEGG_GLYCEROPHOSPHOLIPID_METABOLISM	KEGG_GLYCEROPHOSPHOLIPID_METABOLISM		77	0.252615	0.961897	0.512428	0.608705	1	4130	tags=25%, list=21%, signal=31%
KEGG_AMYOTROPHIC_LATERAL_SCLEROSIS_ALS	KEGG_AMYOTROPHIC_LATERAL_SCLEROSIS_ALS		52	0.240932	0.948342	0.547025	0.622321	1	4297	tags=25%, list=22%, signal=32%
KEGG_NON_SMALL_CELL_LUNG_CANCER	KEGG_NON_SMALL_CELL_LUNG_CANCER		54	0.268746	0.938366	0.506931	0.630921	1	6356	tags=44%, list=33%, signal=66%
KEGG_PRIMARY_IMMUNODEFICIENCY	KEGG_PRIMARY_IMMUNODEFICIENCY		35	0.365907	0.892302	0.544355	0.694192	1	4688	tags=37%, list=24%, signal=49%
KEGG_BETA_ALANINE_METABOLISM	KEGG_BETA_ALANINE_METABOLISM		22	0.295691	0.884081	0.586745	0.699009	1	3397	tags=23%, list=17%, signal=27%
KEGG_ALLOGRAFT_REJECTION	KEGG_ALLOGRAFT_REJECTION		35	0.337152	0.864605	0.603884	0.721389	1	5434	tags=26%, list=28%, signal=36%
KEGG_RIG_I_LIKE_RECEPTOR_SIGNALING_PATHWAY	KEGG_RIG_I_LIKE_RECEPTOR_SIGNALING_PATHWAY		70	0.232971	0.857415	0.655172	0.724139	1	6842	tags=37%, list=35%, signal=57%
KEGG_GLYCOSAMINOGLYCAN_DEGRADATION	KEGG_GLYCOSAMINOGLYCAN_DEGRADATION		21	0.288065	0.821956	0.693032	0.770801	1	3197	tags=19%, list=16%, signal=23%
KEGG_RENIN_ANGIOTENSIN_SYSTEM	KEGG_RENIN_ANGIOTENSIN_SYSTEM		17	0.286858	0.812537	0.704854	0.77745	1	5465	tags=41%, list=28%, signal=57%
KEGG_PROXIMAL_TUBULE_BICARBONATE_RECLAMATION	KEGG_PROXIMAL_TUBULE_BICARBONATE_RECLAMATION		23	0.263231	0.796534	0.737805	0.793966	1	3728	tags=22%, list=19%, signal=27%
KEGG_REGULATION_OF_AUTOPHAGY	KEGG_REGULATION_OF_AUTOPHAGY		34	0.267907	0.788633	0.731557	0.797931	1	7543	tags=41%, list=39%, signal=67%
KEGG_CHRONIC_MYELOID_LEUKEMIA	KEGG_CHRONIC_MYELOID_LEUKEMIA		73	0.225571	0.779876	0.744422	0.802711	1	4549	tags=26%, list=23%, signal=34%
KEGG_SNARE_INTERACTIONS_IN_VESICULAR_TRANSPORT	KEGG_SNARE_INTERACTIONS_IN_VESICULAR_TRANSPORT		38	0.224948	0.778164	0.748538	0.796889	1	3095	tags=18%, list=16%, signal=22%
KEGG_NOD_LIKE_RECEPTOR_SIGNALING_PATHWAY	KEGG_NOD_LIKE_RECEPTOR_SIGNALING_PATHWAY		62	0.215992	0.767135	0.753788	0.804803	1	6051	tags=34%, list=31%, signal=49%
KEGG_EPITHELIAL_CELL_SIGNALING_IN_HELICOBACTER_PYLORI_INFECTION	KEGG_EPITHELIAL_CELL_SIGNALING_IN_HELICOBACTER_PYLORI_INFECTION		68	0.195435	0.741367	0.797323	0.833158	1	1236	tags=7%, list=6%, signal=8%
KEGG_PANCREATIC_CANCER	KEGG_PANCREATIC_CANCER		70	0.197241	0.726889	0.829457	0.844819	1	5394	tags=29%, list=28%, signal=39%
KEGG_LINOLEIC_ACID_METABOLISM	KEGG_LINOLEIC_ACID_METABOLISM		29	0.240774	0.725604	0.83237	0.838046	1	3928	tags=21%, list=20%, signal=26%
KEGG_SPHINGOLIPID_METABOLISM	KEGG_SPHINGOLIPID_METABOLISM		39	0.225418	0.713112	0.834677	0.846413	1	1139	tags=8%, list=6%, signal=8%
KEGG_PROPANOATE_METABOLISM	KEGG_PROPANOATE_METABOLISM		32	0.229523	0.667064	0.840954	0.893574	1	3653	tags=19%, list=19%, signal=23%
KEGG_GRAFT_VERSUS_HOST_DISEASE	KEGG_GRAFT_VERSUS_HOST_DISEASE		37	0.255699	0.665702	0.763527	0.886657	1	9321	tags=46%, list=48%, signal=88%
KEGG_DRUG_METABOLISM_CYTOCHROME_P450	KEGG_DRUG_METABOLISM_CYTOCHROME_P450		70	0.222472	0.657205	0.851626	0.888008	1	2367	tags=11%, list=12%, signal=13%
KEGG_FATTY_ACID_METABOLISM	KEGG_FATTY_ACID_METABOLISM		42	0.201151	0.629393	0.863636	0.908663	1	1131	tags=7%, list=6%, signal=8%
KEGG_STEROID_HORMONE_BIOSYNTHESIS	KEGG_STEROID_HORMONE_BIOSYNTHESIS		55	0.193459	0.586917	0.94499	0.93512	1	1621	tags=7%, list=8%, signal=8%
KEGG_STARCH_AND_SUCROSE_METABOLISM	KEGG_STARCH_AND_SUCROSE_METABOLISM		51	0.158363	0.511711	0.980507	0.969572	1	3297	tags=12%, list=17%, signal=14%

## Sheet: CAST
HIGH EXPRESSION																LOW EXPRESSION
NAME	GS<br> follow link to MSigDB	GS DETAILS	SIZE	ES	NES	NOM p-val	FDR q-val	FWER p-val	RANK AT MAX	LEADING EDGE						NAME	GS<br> follow link to MSigDB	GS DETAILS	SIZE	ES	NES	NOM p-val	FDR q-val	FWER p-val	RANK AT MAX	LEADING EDGE
KEGG_ADHERENS_JUNCTION	KEGG_ADHERENS_JUNCTION	Details ...	73	0.590534	2.18393	0	0.00177941	0.001	2766	tags=40%, list=14%, signal=46%						KEGG_MATURITY_ONSET_DIABETES_OF_THE_YOUNG	KEGG_MATURITY_ONSET_DIABETES_OF_THE_YOUNG	Details ...	25	-0.70061	-1.83425	0.00606061	0.31341	0.208	4676	tags=76%, list=24%, signal=100%
KEGG_REGULATION_OF_ACTIN_CYTOSKELETON	KEGG_REGULATION_OF_ACTIN_CYTOSKELETON	Details ...	212	0.475291	2.06561	0	0.0111032	0.015	2758	tags=29%, list=14%, signal=34%						KEGG_PORPHYRIN_AND_CHLOROPHYLL_METABOLISM	KEGG_PORPHYRIN_AND_CHLOROPHYLL_METABOLISM	Details ...	40	-0.563555	-1.65324	0.0155211	0.727885	0.573	2567	tags=52%, list=13%, signal=60%
KEGG_WNT_SIGNALING_PATHWAY	KEGG_WNT_SIGNALING_PATHWAY	Details ...	150	0.513609	1.98449	0	0.029535	0.046	5661	tags=51%, list=29%, signal=71%						KEGG_RIBOSOME	KEGG_RIBOSOME	Details ...	87	-0.7095	-1.5599	0.103239	0.892867	0.759	2596	tags=64%, list=13%, signal=74%
KEGG_LONG_TERM_POTENTIATION	KEGG_LONG_TERM_POTENTIATION	Details ...	70	0.535927	1.96718	0	0.0284373	0.055	5192	tags=49%, list=27%, signal=66%						KEGG_PENTOSE_AND_GLUCURONATE_INTERCONVERSIONS	KEGG_PENTOSE_AND_GLUCURONATE_INTERCONVERSIONS	Details ...	28	-0.585064	-1.50403	0.0870536	0.92418	0.841	2955	tags=64%, list=15%, signal=76%
KEGG_TGF_BETA_SIGNALING_PATHWAY	KEGG_TGF_BETA_SIGNALING_PATHWAY	Details ...	85	0.554031	1.96379	0	0.023741	0.056	4385	tags=45%, list=22%, signal=57%						KEGG_OXIDATIVE_PHOSPHORYLATION	KEGG_OXIDATIVE_PHOSPHORYLATION	Details ...	116	-0.525004	-1.49635	0.153846	0.767413	0.852	3132	tags=51%, list=16%, signal=60%
KEGG_ENDOMETRIAL_CANCER	KEGG_ENDOMETRIAL_CANCER	Details ...	52	0.583832	1.96065	0.0021322	0.0212177	0.059	2744	tags=38%, list=14%, signal=45%						KEGG_STEROID_BIOSYNTHESIS	KEGG_STEROID_BIOSYNTHESIS	Details ...	17	-0.622606	-1.42281	0.159664	0.926581	0.926	5547	tags=71%, list=28%, signal=99%
KEGG_ERBB_SIGNALING_PATHWAY	KEGG_ERBB_SIGNALING_PATHWAY	Details ...	87	0.528885	1.94767	0	0.0218985	0.07	6178	tags=60%, list=32%, signal=87%						KEGG_RETINOL_METABOLISM	KEGG_RETINOL_METABOLISM	Details ...	64	-0.489062	-1.40836	0.12854	0.853106	0.938	3208	tags=45%, list=16%, signal=54%
KEGG_RENAL_CELL_CARCINOMA	KEGG_RENAL_CELL_CARCINOMA	Details ...	70	0.528453	1.92241	0.0021692	0.0252384	0.09	5195	tags=49%, list=27%, signal=66%						KEGG_METABOLISM_OF_XENOBIOTICS_BY_CYTOCHROME_P450	KEGG_METABOLISM_OF_XENOBIOTICS_BY_CYTOCHROME_P450	Details ...	68	-0.478117	-1.4058	0.12967	0.756023	0.942	2955	tags=49%, list=15%, signal=57%
KEGG_VASCULAR_SMOOTH_MUSCLE_CONTRACTION	KEGG_VASCULAR_SMOOTH_MUSCLE_CONTRACTION	Details ...	115	0.550173	1.92023	0	0.0225981	0.09	5087	tags=50%, list=26%, signal=67%						KEGG_DRUG_METABOLISM_OTHER_ENZYMES	KEGG_DRUG_METABOLISM_OTHER_ENZYMES	Details ...	51	-0.448681	-1.37704	0.125561	0.767038	0.959	3639	tags=49%, list=19%, signal=60%
KEGG_MTOR_SIGNALING_PATHWAY	KEGG_MTOR_SIGNALING_PATHWAY	Details ...	51	0.562091	1.91402	0.0042735	0.0227841	0.099	5277	tags=59%, list=27%, signal=80%						KEGG_GRAFT_VERSUS_HOST_DISEASE	KEGG_GRAFT_VERSUS_HOST_DISEASE	Details ...	37	-0.534891	-1.33311	0.22334	0.836741	0.982	5341	tags=70%, list=27%, signal=97%
KEGG_GAP_JUNCTION	KEGG_GAP_JUNCTION	Details ...	89	0.497673	1.90998	0	0.0215769	0.102	5192	tags=44%, list=27%, signal=59%						KEGG_ASCORBATE_AND_ALDARATE_METABOLISM	KEGG_ASCORBATE_AND_ALDARATE_METABOLISM	Details ...	25	-0.503368	-1.29632	0.186441	0.881986	0.987	2955	tags=60%, list=15%, signal=71%
KEGG_ARRHYTHMOGENIC_RIGHT_VENTRICULAR_CARDIOMYOPATHY_ARVC	KEGG_ARRHYTHMOGENIC_RIGHT_VENTRICULAR_CARDIOMYOPATHY_ARVC	Details ...	74	0.56503	1.90262	0	0.0218826	0.111	5344	tags=54%, list=27%, signal=74%						KEGG_PRIMARY_IMMUNODEFICIENCY	KEGG_PRIMARY_IMMUNODEFICIENCY	Details ...	35	-0.563757	-1.28963	0.267308	0.828547	0.987	5346	tags=66%, list=27%, signal=90%
KEGG_TIGHT_JUNCTION	KEGG_TIGHT_JUNCTION	Details ...	131	0.449395	1.89678	0	0.0215906	0.117	5344	tags=38%, list=27%, signal=52%						KEGG_PENTOSE_PHOSPHATE_PATHWAY	KEGG_PENTOSE_PHOSPHATE_PATHWAY	Details ...	27	-0.445257	-1.27903	0.201735	0.797192	0.99	1834	tags=33%, list=9%, signal=37%
KEGG_UBIQUITIN_MEDIATED_PROTEOLYSIS	KEGG_UBIQUITIN_MEDIATED_PROTEOLYSIS	Details ...	133	0.519577	1.88656	0.00862069	0.0228395	0.135	5304	tags=50%, list=27%, signal=68%						KEGG_STEROID_HORMONE_BIOSYNTHESIS	KEGG_STEROID_HORMONE_BIOSYNTHESIS	Details ...	55	-0.420123	-1.27065	0.189956	0.764354	0.99	4522	tags=53%, list=23%, signal=68%
KEGG_COLORECTAL_CANCER	KEGG_COLORECTAL_CANCER	Details ...	62	0.542461	1.88632	0.00851064	0.0213168	0.135	6044	tags=58%, list=31%, signal=84%						KEGG_GLUTATHIONE_METABOLISM	KEGG_GLUTATHIONE_METABOLISM	Details ...	47	-0.390576	-1.23224	0.251073	0.818692	0.993	3416	tags=40%, list=18%, signal=49%
KEGG_FOCAL_ADHESION	KEGG_FOCAL_ADHESION	Details ...	199	0.521364	1.87729	0.00212314	0.0237256	0.154	5144	tags=48%, list=26%, signal=64%						KEGG_ALLOGRAFT_REJECTION	KEGG_ALLOGRAFT_REJECTION	Details ...	35	-0.510043	-1.22492	0.330612	0.787856	0.994	5524	tags=77%, list=28%, signal=107%
KEGG_PROGESTERONE_MEDIATED_OOCYTE_MATURATION	KEGG_PROGESTERONE_MEDIATED_OOCYTE_MATURATION	Details ...	85	0.485545	1.87298	0.00215983	0.0230948	0.157	3711	tags=33%, list=19%, signal=41%						KEGG_PARKINSONS_DISEASE	KEGG_PARKINSONS_DISEASE	Details ...	113	-0.405858	-1.22103	0.309278	0.752423	0.994	3303	tags=46%, list=17%, signal=55%
KEGG_MELANOGENESIS	KEGG_MELANOGENESIS	Details ...	101	0.481313	1.84739	0	0.0285841	0.192	5192	tags=46%, list=27%, signal=62%						KEGG_TYPE_I_DIABETES_MELLITUS	KEGG_TYPE_I_DIABETES_MELLITUS	Details ...	41	-0.448721	-1.20849	0.308642	0.741616	0.997	5524	tags=71%, list=28%, signal=98%
KEGG_PATHWAYS_IN_CANCER	KEGG_PATHWAYS_IN_CANCER	Details ...	325	0.423846	1.84563	0	0.0280319	0.198	6258	tags=46%, list=32%, signal=66%						KEGG_DRUG_METABOLISM_CYTOCHROME_P450	KEGG_DRUG_METABOLISM_CYTOCHROME_P450	Details ...	70	-0.394024	-1.19181	0.236324	0.7422	0.998	3443	tags=46%, list=18%, signal=55%
KEGG_OOCYTE_MEIOSIS	KEGG_OOCYTE_MEIOSIS	Details ...	112	0.460992	1.84104	0	0.028962	0.214	3554	tags=32%, list=18%, signal=39%						KEGG_AUTOIMMUNE_THYROID_DISEASE	KEGG_AUTOIMMUNE_THYROID_DISEASE	Details ...	50	-0.450279	-1.17749	0.288306	0.739921	1	4371	tags=60%, list=22%, signal=77%
KEGG_LONG_TERM_DEPRESSION	KEGG_LONG_TERM_DEPRESSION		70	0.488376	1.82829	0	0.0311908	0.231	5192	tags=44%, list=27%, signal=60%						KEGG_DNA_REPLICATION	KEGG_DNA_REPLICATION		36	-0.481179	-1.12137	0.380478	0.840485	1	3138	tags=44%, list=16%, signal=53%
KEGG_GLIOMA	KEGG_GLIOMA		65	0.496309	1.82657	0	0.0303181	0.233	6044	tags=54%, list=31%, signal=78%						KEGG_PROTEASOME	KEGG_PROTEASOME		44	-0.458128	-1.09608	0.440252	0.863759	1	3798	tags=43%, list=19%, signal=54%
KEGG_MAPK_SIGNALING_PATHWAY	KEGG_MAPK_SIGNALING_PATHWAY		267	0.439886	1.82305	0	0.0298242	0.239	6346	tags=48%, list=33%, signal=70%						KEGG_INTESTINAL_IMMUNE_NETWORK_FOR_IGA_PRODUCTION	KEGG_INTESTINAL_IMMUNE_NETWORK_FOR_IGA_PRODUCTION		46	-0.415563	-1.08815	0.389864	0.845895	1	5814	tags=63%, list=30%, signal=90%
KEGG_DORSO_VENTRAL_AXIS_FORMATION	KEGG_DORSO_VENTRAL_AXIS_FORMATION		24	0.559653	1.81813	0.00205339	0.0302719	0.25	5920	tags=54%, list=30%, signal=78%						KEGG_ASTHMA	KEGG_ASTHMA		28	-0.442002	-1.07288	0.403361	0.846947	1	5346	tags=68%, list=27%, signal=93%
KEGG_MELANOMA	KEGG_MELANOMA		71	0.454077	1.81507	0	0.0300376	0.258	3409	tags=31%, list=17%, signal=37%						KEGG_ALZHEIMERS_DISEASE	KEGG_ALZHEIMERS_DISEASE		157	-0.288008	-1.0464	0.386179	0.875957	1	3030	tags=36%, list=16%, signal=43%
KEGG_INSULIN_SIGNALING_PATHWAY	KEGG_INSULIN_SIGNALING_PATHWAY		137	0.463487	1.81487	0.00208768	0.0288823	0.258	5403	tags=47%, list=28%, signal=64%						KEGG_BASE_EXCISION_REPAIR	KEGG_BASE_EXCISION_REPAIR		33	-0.37485	-1.00403	0.492063	0.94213	1	3138	tags=39%, list=16%, signal=47%
KEGG_ENDOCYTOSIS	KEGG_ENDOCYTOSIS		181	0.442095	1.78368	0.00420168	0.0380866	0.326	5421	tags=41%, list=28%, signal=57%						KEGG_RNA_POLYMERASE	KEGG_RNA_POLYMERASE		29	-0.33173	-1.00066	0.462777	0.914699	1	1690	tags=28%, list=9%, signal=30%
KEGG_VASOPRESSIN_REGULATED_WATER_REABSORPTION	KEGG_VASOPRESSIN_REGULATED_WATER_REABSORPTION		44	0.513285	1.77017	0.00788955	0.0406628	0.341	3014	tags=36%, list=15%, signal=43%						KEGG_HUNTINGTONS_DISEASE	KEGG_HUNTINGTONS_DISEASE		171	-0.267707	-0.979762	0.461216	0.931028	1	3132	tags=35%, list=16%, signal=41%
KEGG_NEUROTROPHIN_SIGNALING_PATHWAY	KEGG_NEUROTROPHIN_SIGNALING_PATHWAY		125	0.462475	1.76252	0.00425532	0.0417911	0.352	6346	tags=54%, list=33%, signal=79%						KEGG_STARCH_AND_SUCROSE_METABOLISM	KEGG_STARCH_AND_SUCROSE_METABOLISM		51	-0.295556	-0.971194	0.480813	0.918246	1	2567	tags=35%, list=13%, signal=41%
KEGG_DILATED_CARDIOMYOPATHY	KEGG_DILATED_CARDIOMYOPATHY		90	0.50973	1.76241	0	0.0404826	0.352	5375	tags=49%, list=28%, signal=67%						KEGG_AMINO_SUGAR_AND_NUCLEOTIDE_SUGAR_METABOLISM	KEGG_AMINO_SUGAR_AND_NUCLEOTIDE_SUGAR_METABOLISM		44	-0.290666	-0.947108	0.527835	0.94187	1	1510	tags=23%, list=8%, signal=25%
KEGG_LYSINE_DEGRADATION	KEGG_LYSINE_DEGRADATION		44	0.570263	1.76205	0.00840336	0.0394301	0.353	5086	tags=52%, list=26%, signal=71%						KEGG_N_GLYCAN_BIOSYNTHESIS	KEGG_N_GLYCAN_BIOSYNTHESIS		46	-0.321106	-0.940679	0.519115	0.926311	1	3309	tags=43%, list=17%, signal=52%
KEGG_ALDOSTERONE_REGULATED_SODIUM_REABSORPTION	KEGG_ALDOSTERONE_REGULATED_SODIUM_REABSORPTION		42	0.474156	1.74487	0.00817996	0.0447721	0.381	5661	tags=38%, list=29%, signal=54%						KEGG_GLYOXYLATE_AND_DICARBOXYLATE_METABOLISM	KEGG_GLYOXYLATE_AND_DICARBOXYLATE_METABOLISM		16	-0.342766	-0.914531	0.533865	0.953782	1	1028	tags=19%, list=5%, signal=20%
KEGG_HYPERTROPHIC_CARDIOMYOPATHY_HCM	KEGG_HYPERTROPHIC_CARDIOMYOPATHY_HCM		83	0.512207	1.74269	0.00612245	0.0443949	0.385	5375	tags=48%, list=28%, signal=66%						KEGG_GLYCINE_SERINE_AND_THREONINE_METABOLISM	KEGG_GLYCINE_SERINE_AND_THREONINE_METABOLISM		31	-0.274222	-0.908305	0.586481	0.93795	1	2916	tags=35%, list=15%, signal=42%
KEGG_AXON_GUIDANCE	KEGG_AXON_GUIDANCE		129	0.45002	1.74052	0.00420168	0.0437174	0.389	6321	tags=48%, list=32%, signal=71%						KEGG_FRUCTOSE_AND_MANNOSE_METABOLISM	KEGG_FRUCTOSE_AND_MANNOSE_METABOLISM		34	-0.281763	-0.871756	0.608519	0.986272	1	1343	tags=24%, list=7%, signal=25%
KEGG_PHOSPHATIDYLINOSITOL_SIGNALING_SYSTEM	KEGG_PHOSPHATIDYLINOSITOL_SIGNALING_SYSTEM		76	0.506545	1.7325	0.00217865	0.0455777	0.412	6986	tags=59%, list=36%, signal=92%						KEGG_GLYCOSPHINGOLIPID_BIOSYNTHESIS_LACTO_AND_NEOLACTO_SERIES	KEGG_GLYCOSPHINGOLIPID_BIOSYNTHESIS_LACTO_AND_NEOLACTO_SERIES		26	-0.250623	-0.817432	0.70566	1	1	4871	tags=38%, list=25%, signal=51%
KEGG_GNRH_SIGNALING_PATHWAY	KEGG_GNRH_SIGNALING_PATHWAY		101	0.436531	1.7267	0	0.0467404	0.429	5192	tags=37%, list=27%, signal=50%						KEGG_NITROGEN_METABOLISM	KEGG_NITROGEN_METABOLISM		23	-0.242581	-0.809616	0.794549	1	1	1889	tags=22%, list=10%, signal=24%
KEGG_ECM_RECEPTOR_INTERACTION	KEGG_ECM_RECEPTOR_INTERACTION		83	0.516395	1.69538	0.0264766	0.0591255	0.512	4919	tags=49%, list=25%, signal=66%						KEGG_CYSTEINE_AND_METHIONINE_METABOLISM	KEGG_CYSTEINE_AND_METHIONINE_METABOLISM		34	-0.235536	-0.80399	0.727273	1	1	3211	tags=38%, list=16%, signal=46%
KEGG_PROSTATE_CANCER	KEGG_PROSTATE_CANCER		89	0.441358	1.69044	0.012766	0.0606101	0.53	6119	tags=45%, list=31%, signal=65%						KEGG_LINOLEIC_ACID_METABOLISM	KEGG_LINOLEIC_ACID_METABOLISM		29	-0.266863	-0.803401	0.706402	1	1	4743	tags=38%, list=24%, signal=50%
KEGG_THYROID_CANCER	KEGG_THYROID_CANCER		29	0.51808	1.64578	0.0310559	0.0834056	0.614	6197	tags=55%, list=32%, signal=81%						KEGG_ARACHIDONIC_ACID_METABOLISM	KEGG_ARACHIDONIC_ACID_METABOLISM		57	-0.216129	-0.776795	0.799087	1	1	2304	tags=23%, list=12%, signal=26%
KEGG_CHRONIC_MYELOID_LEUKEMIA	KEGG_CHRONIC_MYELOID_LEUKEMIA		73	0.46439	1.64476	0.0464135	0.0817644	0.614	6044	tags=49%, list=31%, signal=71%						KEGG_ANTIGEN_PROCESSING_AND_PRESENTATION	KEGG_ANTIGEN_PROCESSING_AND_PRESENTATION		80	-0.257256	-0.776524	0.683778	1	1	4342	tags=41%, list=22%, signal=53%
KEGG_SNARE_INTERACTIONS_IN_VESICULAR_TRANSPORT	KEGG_SNARE_INTERACTIONS_IN_VESICULAR_TRANSPORT		38	0.469951	1.64443	0.0223124	0.0799085	0.614	4146	tags=39%, list=21%, signal=50%						KEGG_OLFACTORY_TRANSDUCTION	KEGG_OLFACTORY_TRANSDUCTION		371	-0.413913	-0.755841	0.913607	1	1	6785	tags=71%, list=35%, signal=107%
KEGG_INOSITOL_PHOSPHATE_METABOLISM	KEGG_INOSITOL_PHOSPHATE_METABOLISM		54	0.482335	1.60646	0.0288248	0.102597	0.707	6914	tags=59%, list=35%, signal=92%						KEGG_GALACTOSE_METABOLISM	KEGG_GALACTOSE_METABOLISM		26	-0.225826	-0.74455	0.82449	1	1	1781	tags=19%, list=9%, signal=21%
KEGG_ACUTE_MYELOID_LEUKEMIA	KEGG_ACUTE_MYELOID_LEUKEMIA		57	0.462666	1.59046	0.0438413	0.110725	0.73	6044	tags=49%, list=31%, signal=71%						KEGG_RIBOFLAVIN_METABOLISM	KEGG_RIBOFLAVIN_METABOLISM		16	-0.235595	-0.719012	0.843496	1	1	2465	tags=31%, list=13%, signal=36%
KEGG_PANCREATIC_CANCER	KEGG_PANCREATIC_CANCER		70	0.415982	1.58421	0.0355649	0.112563	0.741	6044	tags=44%, list=31%, signal=64%						KEGG_SYSTEMIC_LUPUS_ERYTHEMATOSUS	KEGG_SYSTEMIC_LUPUS_ERYTHEMATOSUS		55	-0.234637	-0.714109	0.70082	1	1	4342	tags=44%, list=22%, signal=56%
KEGG_PATHOGENIC_ESCHERICHIA_COLI_INFECTION	KEGG_PATHOGENIC_ESCHERICHIA_COLI_INFECTION		55	0.391438	1.58346	0.022	0.110539	0.742	3785	tags=27%, list=19%, signal=34%						KEGG_PROTEIN_EXPORT	KEGG_PROTEIN_EXPORT		23	-0.269853	-0.689859	0.74898	1	1	1116	tags=17%, list=6%, signal=18%
KEGG_LEUKOCYTE_TRANSENDOTHELIAL_MIGRATION	KEGG_LEUKOCYTE_TRANSENDOTHELIAL_MIGRATION		115	0.38469	1.57295	0.0338645	0.115267	0.762	6076	tags=36%, list=31%, signal=51%						KEGG_ALANINE_ASPARTATE_AND_GLUTAMATE_METABOLISM	KEGG_ALANINE_ASPARTATE_AND_GLUTAMATE_METABOLISM		30	-0.215271	-0.681428	0.868644	1	1	2321	tags=20%, list=12%, signal=23%
KEGG_SMALL_CELL_LUNG_CANCER	KEGG_SMALL_CELL_LUNG_CANCER		84	0.415303	1.57052	0.0633947	0.114428	0.769	7163	tags=55%, list=37%, signal=86%						KEGG_GLYCOLYSIS_GLUCONEOGENESIS	KEGG_GLYCOLYSIS_GLUCONEOGENESIS		61	-0.199562	-0.681011	0.87473	1	1	3654	tags=33%, list=19%, signal=40%
KEGG_ADIPOCYTOKINE_SIGNALING_PATHWAY	KEGG_ADIPOCYTOKINE_SIGNALING_PATHWAY		67	0.432834	1.56737	0.0382294	0.114311	0.778	6044	tags=49%, list=31%, signal=71%						KEGG_CYTOSOLIC_DNA_SENSING_PATHWAY	KEGG_CYTOSOLIC_DNA_SENSING_PATHWAY		53	-0.215623	-0.680844	0.89144	0.984353	1	3381	tags=26%, list=17%, signal=32%
KEGG_CALCIUM_SIGNALING_PATHWAY	KEGG_CALCIUM_SIGNALING_PATHWAY		177	0.41403	1.56062	0.012474	0.116307	0.786	5087	tags=37%, list=26%, signal=49%						KEGG_ALPHA_LINOLENIC_ACID_METABOLISM	KEGG_ALPHA_LINOLENIC_ACID_METABOLISM		19	-0.212938	-0.649082	0.928862	1	1	1089	tags=16%, list=6%, signal=17%
KEGG_BASAL_CELL_CARCINOMA	KEGG_BASAL_CELL_CARCINOMA		55	0.438546	1.52051	0.0618763	0.14444	0.844	6258	tags=49%, list=32%, signal=72%						KEGG_PYRIMIDINE_METABOLISM	KEGG_PYRIMIDINE_METABOLISM		98	-0.188591	-0.639796	0.844311	0.994815	1	1874	tags=19%, list=10%, signal=21%
KEGG_TYPE_II_DIABETES_MELLITUS	KEGG_TYPE_II_DIABETES_MELLITUS		47	0.415581	1.4952	0.0460251	0.161927	0.874	4670	tags=36%, list=24%, signal=47%						KEGG_MISMATCH_REPAIR	KEGG_MISMATCH_REPAIR		23	-0.258866	-0.63205	0.820359	0.983287	1	1896	tags=30%, list=10%, signal=34%
KEGG_NON_SMALL_CELL_LUNG_CANCER	KEGG_NON_SMALL_CELL_LUNG_CANCER		54	0.412121	1.48336	0.0632653	0.16869	0.889	6044	tags=44%, list=31%, signal=64%						KEGG_GLYCOSAMINOGLYCAN_BIOSYNTHESIS_KERATAN_SULFATE	KEGG_GLYCOSAMINOGLYCAN_BIOSYNTHESIS_KERATAN_SULFATE		15	-0.220929	-0.610031	0.923695	0.985527	1	863	tags=13%, list=4%, signal=14%
KEGG_ABC_TRANSPORTERS	KEGG_ABC_TRANSPORTERS		44	0.432741	1.45229	0.0665323	0.196306	0.922	7707	tags=55%, list=40%, signal=90%						KEGG_SPLICEOSOME	KEGG_SPLICEOSOME		126	-0.205846	-0.609224	0.79596	0.967771	1	2322	tags=24%, list=12%, signal=27%
KEGG_HEDGEHOG_SIGNALING_PATHWAY	KEGG_HEDGEHOG_SIGNALING_PATHWAY		56	0.390993	1.41841	0.0891473	0.227093	0.943	7748	tags=57%, list=40%, signal=95%						KEGG_TERPENOID_BACKBONE_BIOSYNTHESIS	KEGG_TERPENOID_BACKBONE_BIOSYNTHESIS		15	-0.247446	-0.583267	0.85654	0.97214	1	5677	tags=47%, list=29%, signal=66%
KEGG_AMYOTROPHIC_LATERAL_SCLEROSIS_ALS	KEGG_AMYOTROPHIC_LATERAL_SCLEROSIS_ALS		52	0.352957	1.41326	0.0460251	0.228422	0.949	5639	tags=33%, list=29%, signal=46%						KEGG_OTHER_GLYCAN_DEGRADATION	KEGG_OTHER_GLYCAN_DEGRADATION		16	-0.219611	-0.558765	0.908333	0.972645	1	15226	tags=100%, list=78%, signal=455%
KEGG_FC_EPSILON_RI_SIGNALING_PATHWAY	KEGG_FC_EPSILON_RI_SIGNALING_PATHWAY		79	0.366723	1.38021	0.1222	0.260642	0.959	5700	tags=35%, list=29%, signal=50%						KEGG_HEMATOPOIETIC_CELL_LINEAGE	KEGG_HEMATOPOIETIC_CELL_LINEAGE		84	-0.175596	-0.556882	0.923977	0.956591	1	3944	tags=33%, list=20%, signal=42%
KEGG_VEGF_SIGNALING_PATHWAY	KEGG_VEGF_SIGNALING_PATHWAY		76	0.346108	1.37306	0.0944558	0.264388	0.961	5806	tags=36%, list=30%, signal=50%						KEGG_HOMOLOGOUS_RECOMBINATION	KEGG_HOMOLOGOUS_RECOMBINATION		28	-0.194272	-0.531166	0.925926	0.954893	1	2061	tags=21%, list=11%, signal=24%
KEGG_FC_GAMMA_R_MEDIATED_PHAGOCYTOSIS	KEGG_FC_GAMMA_R_MEDIATED_PHAGOCYTOSIS		95	0.347675	1.34165	0.129979	0.297209	0.971	6044	tags=37%, list=31%, signal=53%
KEGG_NOTCH_SIGNALING_PATHWAY	KEGG_NOTCH_SIGNALING_PATHWAY		47	0.381649	1.30694	0.176471	0.336029	0.983	6035	tags=47%, list=31%, signal=68%
KEGG_PROPANOATE_METABOLISM	KEGG_PROPANOATE_METABOLISM		32	0.449656	1.27998	0.219512	0.368376	0.987	8036	tags=63%, list=41%, signal=106%
KEGG_BETA_ALANINE_METABOLISM	KEGG_BETA_ALANINE_METABOLISM		22	0.41096	1.2716	0.197368	0.374933	0.99	8755	tags=68%, list=45%, signal=124%
KEGG_JAK_STAT_SIGNALING_PATHWAY	KEGG_JAK_STAT_SIGNALING_PATHWAY		155	0.336034	1.26812	0.186235	0.373563	0.99	4587	tags=26%, list=24%, signal=34%
KEGG_TRYPTOPHAN_METABOLISM	KEGG_TRYPTOPHAN_METABOLISM		39	0.34453	1.26255	0.185259	0.37563	0.991	4607	tags=28%, list=24%, signal=37%
KEGG_RIG_I_LIKE_RECEPTOR_SIGNALING_PATHWAY	KEGG_RIG_I_LIKE_RECEPTOR_SIGNALING_PATHWAY		70	0.338156	1.24724	0.197581	0.390154	0.994	4737	tags=30%, list=24%, signal=39%
KEGG_O_GLYCAN_BIOSYNTHESIS	KEGG_O_GLYCAN_BIOSYNTHESIS		30	0.399554	1.24116	0.218254	0.392647	0.994	7479	tags=40%, list=38%, signal=65%
KEGG_EPITHELIAL_CELL_SIGNALING_IN_HELICOBACTER_PYLORI_INFECTION	KEGG_EPITHELIAL_CELL_SIGNALING_IN_HELICOBACTER_PYLORI_INFECTION		68	0.312805	1.23979	0.178218	0.388635	0.994	6314	tags=34%, list=32%, signal=50%
KEGG_PRION_DISEASES	KEGG_PRION_DISEASES		35	0.338035	1.21604	0.197292	0.416547	0.995	5216	tags=34%, list=27%, signal=47%
KEGG_PURINE_METABOLISM	KEGG_PURINE_METABOLISM		157	0.269988	1.21536	0.196787	0.411592	0.995	7639	tags=43%, list=39%, signal=70%
KEGG_APOPTOSIS	KEGG_APOPTOSIS		86	0.317866	1.20549	0.244635	0.42009	0.996	6450	tags=38%, list=33%, signal=57%
KEGG_BASAL_TRANSCRIPTION_FACTORS	KEGG_BASAL_TRANSCRIPTION_FACTORS		35	0.362689	1.1994	0.255624	0.42235	0.996	7722	tags=49%, list=40%, signal=80%
KEGG_GLYCOSAMINOGLYCAN_BIOSYNTHESIS_HEPARAN_SULFATE	KEGG_GLYCOSAMINOGLYCAN_BIOSYNTHESIS_HEPARAN_SULFATE		26	0.394237	1.19306	0.244589	0.425074	0.996	6082	tags=50%, list=31%, signal=73%
KEGG_GLYCOSAMINOGLYCAN_DEGRADATION	KEGG_GLYCOSAMINOGLYCAN_DEGRADATION		21	0.383532	1.17716	0.251462	0.443779	0.996	4563	tags=24%, list=23%, signal=31%
KEGG_VIRAL_MYOCARDITIS	KEGG_VIRAL_MYOCARDITIS		68	0.330163	1.17521	0.260956	0.440456	0.996	2467	tags=18%, list=13%, signal=20%
KEGG_REGULATION_OF_AUTOPHAGY	KEGG_REGULATION_OF_AUTOPHAGY		34	0.409349	1.16035	0.296786	0.456512	0.998	5205	tags=35%, list=27%, signal=48%
KEGG_CELL_ADHESION_MOLECULES_CAMS	KEGG_CELL_ADHESION_MOLECULES_CAMS		130	0.315179	1.1603	0.291581	0.450489	0.998	4785	tags=26%, list=25%, signal=34%
KEGG_VALINE_LEUCINE_AND_ISOLEUCINE_DEGRADATION	KEGG_VALINE_LEUCINE_AND_ISOLEUCINE_DEGRADATION		44	0.39179	1.15632	0.316733	0.450091	0.999	7702	tags=55%, list=39%, signal=90%
KEGG_HISTIDINE_METABOLISM	KEGG_HISTIDINE_METABOLISM		29	0.335411	1.15135	0.256917	0.450466	0.999	8199	tags=59%, list=42%, signal=101%
KEGG_BIOSYNTHESIS_OF_UNSATURATED_FATTY_ACIDS	KEGG_BIOSYNTHESIS_OF_UNSATURATED_FATTY_ACIDS		22	0.390383	1.14548	0.320408	0.45287	0.999	7765	tags=64%, list=40%, signal=106%
KEGG_PRIMARY_BILE_ACID_BIOSYNTHESIS	KEGG_PRIMARY_BILE_ACID_BIOSYNTHESIS		16	0.386911	1.13904	0.293103	0.456648	0.999	3991	tags=25%, list=20%, signal=31%
KEGG_GLYCOSPHINGOLIPID_BIOSYNTHESIS_GANGLIO_SERIES	KEGG_GLYCOSPHINGOLIPID_BIOSYNTHESIS_GANGLIO_SERIES		15	0.400972	1.1069	0.337349	0.496276	0.999	5530	tags=33%, list=28%, signal=46%
KEGG_NICOTINATE_AND_NICOTINAMIDE_METABOLISM	KEGG_NICOTINATE_AND_NICOTINAMIDE_METABOLISM		24	0.332678	1.10276	0.347826	0.495961	0.999	5755	tags=38%, list=30%, signal=53%
KEGG_FATTY_ACID_METABOLISM	KEGG_FATTY_ACID_METABOLISM		42	0.352178	1.08628	0.37551	0.514672	0.999	6941	tags=45%, list=36%, signal=70%
KEGG_CHEMOKINE_SIGNALING_PATHWAY	KEGG_CHEMOKINE_SIGNALING_PATHWAY		187	0.274313	1.08142	0.341053	0.515925	0.999	5192	tags=25%, list=27%, signal=34%
KEGG_NOD_LIKE_RECEPTOR_SIGNALING_PATHWAY	KEGG_NOD_LIKE_RECEPTOR_SIGNALING_PATHWAY		62	0.291471	1.07828	0.372984	0.514245	0.999	3947	tags=19%, list=20%, signal=24%
KEGG_GLYCEROLIPID_METABOLISM	KEGG_GLYCEROLIPID_METABOLISM		48	0.291349	1.07266	0.318519	0.516263	0.999	6974	tags=44%, list=36%, signal=68%
KEGG_B_CELL_RECEPTOR_SIGNALING_PATHWAY	KEGG_B_CELL_RECEPTOR_SIGNALING_PATHWAY		75	0.334647	1.06649	0.38412	0.519186	0.999	3947	tags=23%, list=20%, signal=28%
KEGG_T_CELL_RECEPTOR_SIGNALING_PATHWAY	KEGG_T_CELL_RECEPTOR_SIGNALING_PATHWAY		108	0.292206	1.0258	0.423729	0.572502	1	5192	tags=28%, list=27%, signal=38%
KEGG_PYRUVATE_METABOLISM	KEGG_PYRUVATE_METABOLISM		40	0.317668	1.02279	0.4334	0.570401	1	5782	tags=35%, list=30%, signal=50%
KEGG_NUCLEOTIDE_EXCISION_REPAIR	KEGG_NUCLEOTIDE_EXCISION_REPAIR		44	0.337987	1.0174	0.445564	0.57181	1	6373	tags=39%, list=33%, signal=57%
KEGG_TOLL_LIKE_RECEPTOR_SIGNALING_PATHWAY	KEGG_TOLL_LIKE_RECEPTOR_SIGNALING_PATHWAY		101	0.269579	1.01271	0.430303	0.572283	1	6670	tags=34%, list=34%, signal=51%
KEGG_P53_SIGNALING_PATHWAY	KEGG_P53_SIGNALING_PATHWAY		68	0.304212	1.00683	0.449692	0.574654	1	7095	tags=41%, list=36%, signal=64%
KEGG_GLYCOSAMINOGLYCAN_BIOSYNTHESIS_CHONDROITIN_SULFATE	KEGG_GLYCOSAMINOGLYCAN_BIOSYNTHESIS_CHONDROITIN_SULFATE		22	0.370339	0.991176	0.484211	0.591973	1	4621	tags=36%, list=24%, signal=48%
KEGG_GLYCEROPHOSPHOLIPID_METABOLISM	KEGG_GLYCEROPHOSPHOLIPID_METABOLISM		77	0.242692	0.957229	0.508876	0.635886	1	7313	tags=40%, list=37%, signal=64%
KEGG_BLADDER_CANCER	KEGG_BLADDER_CANCER		42	0.268286	0.944097	0.524558	0.64965	1	5986	tags=36%, list=31%, signal=51%
KEGG_CELL_CYCLE	KEGG_CELL_CYCLE		124	0.280497	0.917838	0.54326	0.684402	1	5760	tags=28%, list=30%, signal=40%
KEGG_PPAR_SIGNALING_PATHWAY	KEGG_PPAR_SIGNALING_PATHWAY		69	0.265277	0.917337	0.541985	0.678011	1	7053	tags=39%, list=36%, signal=61%
KEGG_SPHINGOLIPID_METABOLISM	KEGG_SPHINGOLIPID_METABOLISM		39	0.275864	0.901632	0.583497	0.695647	1	6820	tags=38%, list=35%, signal=59%
KEGG_RNA_DEGRADATION	KEGG_RNA_DEGRADATION		57	0.288076	0.870355	0.567288	0.735363	1	4259	tags=26%, list=22%, signal=34%
KEGG_PROXIMAL_TUBULE_BICARBONATE_RECLAMATION	KEGG_PROXIMAL_TUBULE_BICARBONATE_RECLAMATION		23	0.288792	0.852695	0.651485	0.757278	1	3603	tags=22%, list=18%, signal=27%
KEGG_PHENYLALANINE_METABOLISM	KEGG_PHENYLALANINE_METABOLISM		18	0.244261	0.842312	0.734463	0.765369	1	789	tags=11%, list=4%, signal=12%
KEGG_RENIN_ANGIOTENSIN_SYSTEM	KEGG_RENIN_ANGIOTENSIN_SYSTEM		17	0.293573	0.841495	0.667961	0.75916	1	1244	tags=12%, list=6%, signal=13%
KEGG_COMPLEMENT_AND_COAGULATION_CASCADES	KEGG_COMPLEMENT_AND_COAGULATION_CASCADES		69	0.239744	0.827912	0.667311	0.772865	1	6761	tags=33%, list=35%, signal=51%
KEGG_ARGININE_AND_PROLINE_METABOLISM	KEGG_ARGININE_AND_PROLINE_METABOLISM		54	0.237943	0.825569	0.674242	0.769133	1	4556	tags=22%, list=23%, signal=29%
KEGG_NATURAL_KILLER_CELL_MEDIATED_CYTOTOXICITY	KEGG_NATURAL_KILLER_CELL_MEDIATED_CYTOTOXICITY		131	0.214523	0.799013	0.669371	0.800634	1	3680	tags=15%, list=19%, signal=18%
KEGG_PEROXISOME	KEGG_PEROXISOME		78	0.22967	0.781234	0.684512	0.819886	1	7062	tags=44%, list=36%, signal=68%
KEGG_SELENOAMINO_ACID_METABOLISM	KEGG_SELENOAMINO_ACID_METABOLISM		25	0.252681	0.767954	0.761616	0.831148	1	5668	tags=32%, list=29%, signal=45%
KEGG_VIBRIO_CHOLERAE_INFECTION	KEGG_VIBRIO_CHOLERAE_INFECTION		54	0.189226	0.755872	0.848948	0.840542	1	6314	tags=31%, list=32%, signal=46%
KEGG_CARDIAC_MUSCLE_CONTRACTION	KEGG_CARDIAC_MUSCLE_CONTRACTION		73	0.227469	0.748343	0.780876	0.84361	1	1992	tags=14%, list=10%, signal=15%
KEGG_LYSOSOME	KEGG_LYSOSOME		121	0.217052	0.747785	0.7182	0.836563	1	6691	tags=33%, list=34%, signal=50%
KEGG_TYROSINE_METABOLISM	KEGG_TYROSINE_METABOLISM		42	0.186782	0.734794	0.926923	0.846853	1	7850	tags=48%, list=40%, signal=80%
KEGG_NEUROACTIVE_LIGAND_RECEPTOR_INTERACTION	KEGG_NEUROACTIVE_LIGAND_RECEPTOR_INTERACTION		271	0.222615	0.730258	0.763462	0.845226	1	5983	tags=25%, list=31%, signal=35%
KEGG_ETHER_LIPID_METABOLISM	KEGG_ETHER_LIPID_METABOLISM		33	0.212054	0.716764	0.860835	0.856324	1	6422	tags=30%, list=33%, signal=45%
KEGG_BUTANOATE_METABOLISM	KEGG_BUTANOATE_METABOLISM		34	0.227948	0.701619	0.803279	0.867932	1	4484	tags=21%, list=23%, signal=27%
KEGG_CITRATE_CYCLE_TCA_CYCLE	KEGG_CITRATE_CYCLE_TCA_CYCLE		30	0.265706	0.686601	0.748031	0.877991	1	8249	tags=50%, list=42%, signal=87%
KEGG_PANTOTHENATE_AND_COA_BIOSYNTHESIS	KEGG_PANTOTHENATE_AND_COA_BIOSYNTHESIS		16	0.220588	0.666578	0.906489	0.89384	1	2746	tags=13%, list=14%, signal=15%
KEGG_GLYCOSYLPHOSPHATIDYLINOSITOL_GPI_ANCHOR_BIOSYNTHESIS	KEGG_GLYCOSYLPHOSPHATIDYLINOSITOL_GPI_ANCHOR_BIOSYNTHESIS		24	0.22593	0.63141	0.853002	0.922708	1	7597	tags=42%, list=39%, signal=68%
KEGG_TASTE_TRANSDUCTION	KEGG_TASTE_TRANSDUCTION		51	0.227479	0.61941	0.870656	0.925479	1	7939	tags=41%, list=41%, signal=69%
KEGG_CYTOKINE_CYTOKINE_RECEPTOR_INTERACTION	KEGG_CYTOKINE_CYTOKINE_RECEPTOR_INTERACTION		262	0.161479	0.613095	0.902724	0.923559	1	4587	tags=17%, list=24%, signal=22%
KEGG_LEISHMANIA_INFECTION	KEGG_LEISHMANIA_INFECTION		68	0.158474	0.510942	0.939759	0.981546	1	2766	tags=10%, list=14%, signal=12%
KEGG_ONE_CARBON_POOL_BY_FOLATE	KEGG_ONE_CARBON_POOL_BY_FOLATE		17	0.185903	0.46784	0.980687	0.987986	1	7210	tags=35%, list=37%, signal=56%
KEGG_AMINOACYL_TRNA_BIOSYNTHESIS	KEGG_AMINOACYL_TRNA_BIOSYNTHESIS		22	0.18381	0.426538	0.962	0.989296	1	8230	tags=41%, list=42%, signal=71%

## Sheet: FRZB
HIGH															LOW
NAME	GS<br> follow link to MSigDB	GS DETAILS	SIZE	ES	NES	NOM p-val	FDR q-val	FWER p-val	RANK AT MAX	LEADING EDGE					NAME	GS<br> follow link to MSigDB	GS DETAILS	SIZE	ES	NES	NOM p-val	FDR q-val	FWER p-val	RANK AT MAX	LEADING EDGE
KEGG_VASCULAR_SMOOTH_MUSCLE_CONTRACTION	KEGG_VASCULAR_SMOOTH_MUSCLE_CONTRACTION	Details ...	115	0.594895	2.10328	0	0.00405412	0.004	4150	tags=47%, list=21%, signal=59%					KEGG_PROTEASOME	KEGG_PROTEASOME	Details ...	44	-0.804245	-1.91645	0	0.103077	0.073	2869	tags=84%, list=15%, signal=98%
KEGG_MELANOGENESIS	KEGG_MELANOGENESIS	Details ...	101	0.525931	2.05373	0	0.0058778	0.01	4889	tags=44%, list=25%, signal=58%					KEGG_PYRIMIDINE_METABOLISM	KEGG_PYRIMIDINE_METABOLISM	Details ...	98	-0.585767	-1.8983	0	0.0599655	0.089	3618	tags=56%, list=19%, signal=69%
KEGG_CALCIUM_SIGNALING_PATHWAY	KEGG_CALCIUM_SIGNALING_PATHWAY	Details ...	177	0.550098	2.05276	0	0.00391853	0.01	4396	tags=47%, list=23%, signal=61%					KEGG_BASE_EXCISION_REPAIR	KEGG_BASE_EXCISION_REPAIR	Details ...	33	-0.739466	-1.88896	0.00204499	0.0464405	0.101	4152	tags=79%, list=21%, signal=100%
KEGG_BASAL_CELL_CARCINOMA	KEGG_BASAL_CELL_CARCINOMA	Details ...	55	0.554213	1.9068	0.00204499	0.0488617	0.102	4852	tags=42%, list=25%, signal=56%					KEGG_PENTOSE_PHOSPHATE_PATHWAY	KEGG_PENTOSE_PHOSPHATE_PATHWAY	Details ...	27	-0.640888	-1.81348	0.00594059	0.0862437	0.215	4051	tags=63%, list=21%, signal=79%
KEGG_DILATED_CARDIOMYOPATHY	KEGG_DILATED_CARDIOMYOPATHY	Details ...	90	0.558844	1.88224	0	0.0527784	0.135	4506	tags=49%, list=23%, signal=63%					KEGG_AMINOACYL_TRNA_BIOSYNTHESIS	KEGG_AMINOACYL_TRNA_BIOSYNTHESIS	Details ...	22	-0.759477	-1.80248	0	0.0763002	0.234	3280	tags=73%, list=17%, signal=87%
KEGG_HYPERTROPHIC_CARDIOMYOPATHY_HCM	KEGG_HYPERTROPHIC_CARDIOMYOPATHY_HCM	Details ...	83	0.544144	1.82824	0.00204918	0.0843498	0.214	2755	tags=37%, list=14%, signal=43%					KEGG_DNA_REPLICATION	KEGG_DNA_REPLICATION	Details ...	36	-0.790398	-1.79937	0.008	0.0666706	0.241	3238	tags=81%, list=17%, signal=96%
KEGG_HEDGEHOG_SIGNALING_PATHWAY	KEGG_HEDGEHOG_SIGNALING_PATHWAY	Details ...	56	0.52279	1.80141	0.00614754	0.0950834	0.267	2874	tags=27%, list=15%, signal=31%					KEGG_SPLICEOSOME	KEGG_SPLICEOSOME	Details ...	126	-0.626032	-1.77511	0.022	0.0726493	0.292	4520	tags=70%, list=23%, signal=90%
KEGG_ARRHYTHMOGENIC_RIGHT_VENTRICULAR_CARDIOMYOPATHY_ARVC	KEGG_ARRHYTHMOGENIC_RIGHT_VENTRICULAR_CARDIOMYOPATHY_ARVC	Details ...	74	0.51542	1.77942	0.0143443	0.107787	0.322	4905	tags=50%, list=25%, signal=67%					KEGG_CELL_CYCLE	KEGG_CELL_CYCLE	Details ...	124	-0.563769	-1.75203	0.0177866	0.0797595	0.334	3393	tags=52%, list=17%, signal=63%
KEGG_FOCAL_ADHESION	KEGG_FOCAL_ADHESION	Details ...	199	0.484956	1.74487	0.0122951	0.129345	0.403	4630	tags=43%, list=24%, signal=55%					KEGG_GLYOXYLATE_AND_DICARBOXYLATE_METABOLISM	KEGG_GLYOXYLATE_AND_DICARBOXYLATE_METABOLISM	Details ...	16	-0.7003	-1.73273	0.012	0.0854024	0.382	3254	tags=63%, list=17%, signal=75%
KEGG_MELANOMA	KEGG_MELANOMA	Details ...	71	0.442376	1.72412	0.0020202	0.1379	0.453	3469	tags=30%, list=18%, signal=36%					KEGG_MISMATCH_REPAIR	KEGG_MISMATCH_REPAIR	Details ...	23	-0.719492	-1.70298	0.0304878	0.103178	0.451	1695	tags=52%, list=9%, signal=57%
KEGG_CELL_ADHESION_MOLECULES_CAMS	KEGG_CELL_ADHESION_MOLECULES_CAMS	Details ...	130	0.490825	1.72338	0.0195695	0.126936	0.459	4551	tags=37%, list=23%, signal=48%					KEGG_HUNTINGTONS_DISEASE	KEGG_HUNTINGTONS_DISEASE	Details ...	171	-0.466269	-1.68597	0.0331263	0.108508	0.496	4133	tags=53%, list=21%, signal=67%
KEGG_PHOSPHATIDYLINOSITOL_SIGNALING_SYSTEM	KEGG_PHOSPHATIDYLINOSITOL_SIGNALING_SYSTEM	Details ...	76	0.464809	1.71115	0.00613497	0.130583	0.486	4902	tags=46%, list=25%, signal=61%					KEGG_RNA_DEGRADATION	KEGG_RNA_DEGRADATION	Details ...	57	-0.566913	-1.66725	0.0515873	0.115694	0.548	3003	tags=44%, list=15%, signal=52%
KEGG_NEUROACTIVE_LIGAND_RECEPTOR_INTERACTION	KEGG_NEUROACTIVE_LIGAND_RECEPTOR_INTERACTION	Details ...	271	0.505303	1.70752	0.0039604	0.12407	0.495	5679	tags=53%, list=29%, signal=74%					KEGG_HOMOLOGOUS_RECOMBINATION	KEGG_HOMOLOGOUS_RECOMBINATION	Details ...	28	-0.634951	-1.66719	0.0281125	0.106834	0.548	3238	tags=50%, list=17%, signal=60%
KEGG_REGULATION_OF_ACTIN_CYTOSKELETON	KEGG_REGULATION_OF_ACTIN_CYTOSKELETON	Details ...	212	0.402594	1.70574	0.0103093	0.117833	0.501	4618	tags=36%, list=24%, signal=46%					KEGG_FRUCTOSE_AND_MANNOSE_METABOLISM	KEGG_FRUCTOSE_AND_MANNOSE_METABOLISM	Details ...	34	-0.588019	-1.65819	0.0284553	0.105331	0.567	3755	tags=53%, list=19%, signal=65%
KEGG_GLYCOSPHINGOLIPID_BIOSYNTHESIS_GANGLIO_SERIES	KEGG_GLYCOSPHINGOLIPID_BIOSYNTHESIS_GANGLIO_SERIES	Details ...	15	0.612547	1.70186	0.0135397	0.113196	0.503	1978	tags=33%, list=10%, signal=37%					KEGG_ONE_CARBON_POOL_BY_FOLATE	KEGG_ONE_CARBON_POOL_BY_FOLATE	Details ...	17	-0.639434	-1.65105	0.0314342	0.104936	0.589	1072	tags=47%, list=5%, signal=50%
KEGG_MAPK_SIGNALING_PATHWAY	KEGG_MAPK_SIGNALING_PATHWAY	Details ...	267	0.403161	1.68788	0.00409836	0.119467	0.534	5968	tags=39%, list=31%, signal=56%					KEGG_RNA_POLYMERASE	KEGG_RNA_POLYMERASE	Details ...	29	-0.560374	-1.63165	0.0266393	0.114967	0.642	4126	tags=55%, list=21%, signal=70%
KEGG_AXON_GUIDANCE	KEGG_AXON_GUIDANCE	Details ...	129	0.417958	1.6619	0.00420168	0.139331	0.599	4359	tags=36%, list=22%, signal=47%					KEGG_PROTEIN_EXPORT	KEGG_PROTEIN_EXPORT	Details ...	23	-0.674271	-1.62834	0.037422	0.111513	0.651	2600	tags=65%, list=13%, signal=75%
KEGG_ECM_RECEPTOR_INTERACTION	KEGG_ECM_RECEPTOR_INTERACTION	Details ...	83	0.554217	1.64543	0.0449898	0.149367	0.647	4761	tags=55%, list=24%, signal=73%					KEGG_OXIDATIVE_PHOSPHORYLATION	KEGG_OXIDATIVE_PHOSPHORYLATION	Details ...	116	-0.585724	-1.62518	0.0793319	0.107305	0.658	4133	tags=64%, list=21%, signal=80%
KEGG_LONG_TERM_DEPRESSION	KEGG_LONG_TERM_DEPRESSION	Details ...	70	0.443798	1.64368	0.0144033	0.14401	0.652	4891	tags=40%, list=25%, signal=53%					KEGG_NUCLEOTIDE_EXCISION_REPAIR	KEGG_NUCLEOTIDE_EXCISION_REPAIR	Details ...	44	-0.569122	-1.62327	0.0460922	0.103627	0.66	4209	tags=57%, list=22%, signal=72%
KEGG_GAP_JUNCTION	KEGG_GAP_JUNCTION	Details ...	89	0.435516	1.64313	0.0207469	0.137226	0.653	4645	tags=42%, list=24%, signal=54%					KEGG_STEROID_BIOSYNTHESIS	KEGG_STEROID_BIOSYNTHESIS	Details ...	17	-0.723696	-1.62207	0.0423387	0.0990692	0.661	3822	tags=71%, list=20%, signal=88%
KEGG_LEUKOCYTE_TRANSENDOTHELIAL_MIGRATION	KEGG_LEUKOCYTE_TRANSENDOTHELIAL_MIGRATION		115	0.417723	1.63508	0.0121951	0.138029	0.667	5024	tags=37%, list=26%, signal=50%					KEGG_TERPENOID_BACKBONE_BIOSYNTHESIS	KEGG_TERPENOID_BACKBONE_BIOSYNTHESIS		15	-0.722211	-1.60673	0.0530612	0.106018	0.697	1627	tags=53%, list=8%, signal=58%
KEGG_WNT_SIGNALING_PATHWAY	KEGG_WNT_SIGNALING_PATHWAY		150	0.397438	1.6331	0.00404858	0.133573	0.673	5888	tags=41%, list=30%, signal=58%					KEGG_ALANINE_ASPARTATE_AND_GLUTAMATE_METABOLISM	KEGG_ALANINE_ASPARTATE_AND_GLUTAMATE_METABOLISM		30	-0.528183	-1.58217	0.0492813	0.119917	0.75	4319	tags=57%, list=22%, signal=73%
KEGG_VASOPRESSIN_REGULATED_WATER_REABSORPTION	KEGG_VASOPRESSIN_REGULATED_WATER_REABSORPTION		44	0.462481	1.60293	0.0273684	0.159354	0.735	4219	tags=30%, list=22%, signal=38%					KEGG_ALZHEIMERS_DISEASE	KEGG_ALZHEIMERS_DISEASE		157	-0.432613	-1.55477	0.0924025	0.139828	0.807	2564	tags=39%, list=13%, signal=45%
KEGG_TGF_BETA_SIGNALING_PATHWAY	KEGG_TGF_BETA_SIGNALING_PATHWAY		85	0.44907	1.58828	0.0409836	0.168427	0.764	4998	tags=44%, list=26%, signal=58%					KEGG_GLYCOLYSIS_GLUCONEOGENESIS	KEGG_GLYCOLYSIS_GLUCONEOGENESIS		61	-0.456984	-1.54531	0.0479042	0.142683	0.823	3081	tags=34%, list=16%, signal=41%
KEGG_ADHERENS_JUNCTION	KEGG_ADHERENS_JUNCTION		73	0.408757	1.58707	0.0109409	0.163147	0.766	3501	tags=30%, list=18%, signal=37%					KEGG_CITRATE_CYCLE_TCA_CYCLE	KEGG_CITRATE_CYCLE_TCA_CYCLE		30	-0.604023	-1.50077	0.108696	0.179152	0.886	4926	tags=67%, list=25%, signal=89%
KEGG_ABC_TRANSPORTERS	KEGG_ABC_TRANSPORTERS		44	0.464605	1.55798	0.037182	0.189156	0.814	4473	tags=36%, list=23%, signal=47%					KEGG_GLUTATHIONE_METABOLISM	KEGG_GLUTATHIONE_METABOLISM		47	-0.457108	-1.47813	0.064	0.194743	0.906	2668	tags=43%, list=14%, signal=49%
KEGG_PRIMARY_BILE_ACID_BIOSYNTHESIS	KEGG_PRIMARY_BILE_ACID_BIOSYNTHESIS		16	0.538263	1.54406	0.0562016	0.199218	0.838	2691	tags=44%, list=14%, signal=51%					KEGG_PARKINSONS_DISEASE	KEGG_PARKINSONS_DISEASE		113	-0.496808	-1.45632	0.171488	0.209756	0.928	2689	tags=50%, list=14%, signal=57%
KEGG_GLYCOSAMINOGLYCAN_BIOSYNTHESIS_CHONDROITIN_SULFATE	KEGG_GLYCOSAMINOGLYCAN_BIOSYNTHESIS_CHONDROITIN_SULFATE		22	0.600089	1.53153	0.0588235	0.205956	0.859	4383	tags=55%, list=22%, signal=70%					KEGG_RIBOSOME	KEGG_RIBOSOME		87	-0.631895	-1.43876	0.168675	0.221422	0.938	6620	tags=87%, list=34%, signal=132%
KEGG_LONG_TERM_POTENTIATION	KEGG_LONG_TERM_POTENTIATION		70	0.402268	1.52609	0.0261569	0.205697	0.865	4337	tags=37%, list=22%, signal=48%					KEGG_DRUG_METABOLISM_OTHER_ENZYMES	KEGG_DRUG_METABOLISM_OTHER_ENZYMES		51	-0.43089	-1.38767	0.0841683	0.275089	0.961	3926	tags=43%, list=20%, signal=54%
KEGG_PATHWAYS_IN_CANCER	KEGG_PATHWAYS_IN_CANCER		325	0.354321	1.52557	0.0181452	0.199364	0.865	3289	tags=25%, list=17%, signal=29%					KEGG_CYSTEINE_AND_METHIONINE_METABOLISM	KEGG_CYSTEINE_AND_METHIONINE_METABOLISM		34	-0.439719	-1.3825	0.0956341	0.272471	0.961	2578	tags=38%, list=13%, signal=44%
KEGG_TIGHT_JUNCTION	KEGG_TIGHT_JUNCTION		131	0.355014	1.52506	0.0212766	0.193232	0.866	3135	tags=22%, list=16%, signal=26%					KEGG_P53_SIGNALING_PATHWAY	KEGG_P53_SIGNALING_PATHWAY		68	-0.410415	-1.37208	0.116505	0.275835	0.963	2251	tags=34%, list=12%, signal=38%
KEGG_DORSO_VENTRAL_AXIS_FORMATION	KEGG_DORSO_VENTRAL_AXIS_FORMATION		24	0.46153	1.51674	0.0583501	0.196268	0.877	5963	tags=54%, list=31%, signal=78%					KEGG_GLYCOSYLPHOSPHATIDYLINOSITOL_GPI_ANCHOR_BIOSYNTHESIS	KEGG_GLYCOSYLPHOSPHATIDYLINOSITOL_GPI_ANCHOR_BIOSYNTHESIS		24	-0.485986	-1.33985	0.158436	0.30781	0.979	3024	tags=46%, list=16%, signal=54%
KEGG_GNRH_SIGNALING_PATHWAY	KEGG_GNRH_SIGNALING_PATHWAY		101	0.374818	1.51303	0.01875	0.194703	0.881	5777	tags=37%, list=30%, signal=52%					KEGG_OOCYTE_MEIOSIS	KEGG_OOCYTE_MEIOSIS		112	-0.347744	-1.32759	0.159763	0.314259	0.981	1972	tags=26%, list=10%, signal=29%
KEGG_COMPLEMENT_AND_COAGULATION_CASCADES	KEGG_COMPLEMENT_AND_COAGULATION_CASCADES		69	0.445868	1.50934	0.0504854	0.19291	0.885	3578	tags=29%, list=18%, signal=35%					KEGG_PORPHYRIN_AND_CHLOROPHYLL_METABOLISM	KEGG_PORPHYRIN_AND_CHLOROPHYLL_METABOLISM		40	-0.425896	-1.32619	0.109937	0.306805	0.981	4587	tags=45%, list=24%, signal=59%
KEGG_ERBB_SIGNALING_PATHWAY	KEGG_ERBB_SIGNALING_PATHWAY		87	0.395586	1.49571	0.049896	0.202126	0.897	4469	tags=33%, list=23%, signal=43%					KEGG_N_GLYCAN_BIOSYNTHESIS	KEGG_N_GLYCAN_BIOSYNTHESIS		46	-0.438316	-1.32431	0.2	0.300297	0.982	3930	tags=52%, list=20%, signal=65%
KEGG_MTOR_SIGNALING_PATHWAY	KEGG_MTOR_SIGNALING_PATHWAY		51	0.410421	1.49489	0.0480167	0.197366	0.898	3307	tags=33%, list=17%, signal=40%					KEGG_PYRUVATE_METABOLISM	KEGG_PYRUVATE_METABOLISM		40	-0.42422	-1.31437	0.167331	0.304366	0.986	3297	tags=38%, list=17%, signal=45%
KEGG_HEMATOPOIETIC_CELL_LINEAGE	KEGG_HEMATOPOIETIC_CELL_LINEAGE		84	0.489934	1.49116	0.0775194	0.195704	0.903	6198	tags=52%, list=32%, signal=76%					KEGG_GALACTOSE_METABOLISM	KEGG_GALACTOSE_METABOLISM		26	-0.417243	-1.29686	0.162602	0.31901	0.993	3418	tags=35%, list=18%, signal=42%
KEGG_CYTOKINE_CYTOKINE_RECEPTOR_INTERACTION	KEGG_CYTOKINE_CYTOKINE_RECEPTOR_INTERACTION		262	0.402877	1.47293	0.0545113	0.209988	0.921	6363	tags=44%, list=33%, signal=64%					KEGG_AMINO_SUGAR_AND_NUCLEOTIDE_SUGAR_METABOLISM	KEGG_AMINO_SUGAR_AND_NUCLEOTIDE_SUGAR_METABOLISM		44	-0.408008	-1.28067	0.225207	0.331394	0.995	3961	tags=48%, list=20%, signal=60%
KEGG_JAK_STAT_SIGNALING_PATHWAY	KEGG_JAK_STAT_SIGNALING_PATHWAY		155	0.395571	1.46426	0.0393701	0.214419	0.931	7182	tags=48%, list=37%, signal=76%					KEGG_PURINE_METABOLISM	KEGG_PURINE_METABOLISM		157	-0.295939	-1.28041	0.141079	0.323209	0.995	3345	tags=36%, list=17%, signal=43%
KEGG_RENAL_CELL_CARCINOMA	KEGG_RENAL_CELL_CARCINOMA		70	0.384327	1.45368	0.0742268	0.219765	0.935	4250	tags=36%, list=22%, signal=46%					KEGG_ARGININE_AND_PROLINE_METABOLISM	KEGG_ARGININE_AND_PROLINE_METABOLISM		54	-0.375106	-1.26601	0.197959	0.332395	1	4319	tags=48%, list=22%, signal=62%
KEGG_CHEMOKINE_SIGNALING_PATHWAY	KEGG_CHEMOKINE_SIGNALING_PATHWAY		187	0.376178	1.40667	0.0809249	0.270825	0.957	4741	tags=33%, list=24%, signal=43%					KEGG_PENTOSE_AND_GLUCURONATE_INTERCONVERSIONS	KEGG_PENTOSE_AND_GLUCURONATE_INTERCONVERSIONS		28	-0.446258	-1.21152	0.252654	0.397552	1	6268	tags=61%, list=32%, signal=89%
KEGG_INOSITOL_PHOSPHATE_METABOLISM	KEGG_INOSITOL_PHOSPHATE_METABOLISM		54	0.394077	1.39835	0.111345	0.274644	0.965	5106	tags=46%, list=26%, signal=63%					KEGG_PANTOTHENATE_AND_COA_BIOSYNTHESIS	KEGG_PANTOTHENATE_AND_COA_BIOSYNTHESIS		16	-0.421046	-1.1877	0.237395	0.421139	1	4999	tags=50%, list=26%, signal=67%
KEGG_NEUROTROPHIN_SIGNALING_PATHWAY	KEGG_NEUROTROPHIN_SIGNALING_PATHWAY		125	0.346772	1.39388	0.0747475	0.274198	0.966	4151	tags=29%, list=21%, signal=36%					KEGG_PEROXISOME	KEGG_PEROXISOME		78	-0.343005	-1.14193	0.31746	0.477407	1	5817	tags=51%, list=30%, signal=73%
KEGG_ACUTE_MYELOID_LEUKEMIA	KEGG_ACUTE_MYELOID_LEUKEMIA		57	0.388049	1.39148	0.11336	0.271059	0.967	3258	tags=26%, list=17%, signal=32%					KEGG_PATHOGENIC_ESCHERICHIA_COLI_INFECTION	KEGG_PATHOGENIC_ESCHERICHIA_COLI_INFECTION		55	-0.306725	-1.1296	0.276471	0.485566	1	2271	tags=29%, list=12%, signal=33%
KEGG_ALDOSTERONE_REGULATED_SODIUM_REABSORPTION	KEGG_ALDOSTERONE_REGULATED_SODIUM_REABSORPTION		42	0.361215	1.34389	0.0849057	0.328168	0.983	5777	tags=40%, list=30%, signal=57%					KEGG_GLYCINE_SERINE_AND_THREONINE_METABOLISM	KEGG_GLYCINE_SERINE_AND_THREONINE_METABOLISM		31	-0.339365	-1.12829	0.269978	0.476721	1	2409	tags=29%, list=12%, signal=33%
KEGG_COLORECTAL_CANCER	KEGG_COLORECTAL_CANCER		62	0.354935	1.34368	0.125498	0.321391	0.983	4592	tags=32%, list=24%, signal=42%					KEGG_SELENOAMINO_ACID_METABOLISM	KEGG_SELENOAMINO_ACID_METABOLISM		25	-0.373005	-1.11261	0.327345	0.490098	1	5206	tags=60%, list=27%, signal=82%
KEGG_ADIPOCYTOKINE_SIGNALING_PATHWAY	KEGG_ADIPOCYTOKINE_SIGNALING_PATHWAY		67	0.369077	1.33866	0.145129	0.320621	0.984	6811	tags=42%, list=35%, signal=64%					KEGG_VIBRIO_CHOLERAE_INFECTION	KEGG_VIBRIO_CHOLERAE_INFECTION		54	-0.287535	-1.09945	0.326882	0.498811	1	3955	tags=37%, list=20%, signal=46%
KEGG_VEGF_SIGNALING_PATHWAY	KEGG_VEGF_SIGNALING_PATHWAY		76	0.309438	1.31133	0.10099	0.352219	0.988	5488	tags=33%, list=28%, signal=46%					KEGG_BUTANOATE_METABOLISM	KEGG_BUTANOATE_METABOLISM		34	-0.343287	-1.05295	0.4	0.560063	1	5017	tags=44%, list=26%, signal=59%
KEGG_INSULIN_SIGNALING_PATHWAY	KEGG_INSULIN_SIGNALING_PATHWAY		137	0.319393	1.29964	0.128631	0.361707	0.992	4465	tags=28%, list=23%, signal=36%					KEGG_VALINE_LEUCINE_AND_ISOLEUCINE_DEGRADATION	KEGG_VALINE_LEUCINE_AND_ISOLEUCINE_DEGRADATION		44	-0.362633	-1.04107	0.440711	0.567704	1	5017	tags=45%, list=26%, signal=61%
KEGG_GLIOMA	KEGG_GLIOMA		65	0.351979	1.28644	0.156057	0.373481	0.993	4150	tags=29%, list=21%, signal=37%					KEGG_BASAL_TRANSCRIPTION_FACTORS	KEGG_BASAL_TRANSCRIPTION_FACTORS		35	-0.31811	-1.01341	0.444882	0.600885	1	5550	tags=51%, list=28%, signal=72%
KEGG_ENDOCYTOSIS	KEGG_ENDOCYTOSIS		181	0.296448	1.27965	0.154639	0.375768	0.993	5121	tags=33%, list=26%, signal=44%					KEGG_MATURITY_ONSET_DIABETES_OF_THE_YOUNG	KEGG_MATURITY_ONSET_DIABETES_OF_THE_YOUNG		25	-0.368956	-1.01034	0.428866	0.594249	1	4964	tags=40%, list=25%, signal=54%
KEGG_RENIN_ANGIOTENSIN_SYSTEM	KEGG_RENIN_ANGIOTENSIN_SYSTEM		17	0.435265	1.27774	0.160396	0.371535	0.993	3474	tags=35%, list=18%, signal=43%					KEGG_NICOTINATE_AND_NICOTINAMIDE_METABOLISM	KEGG_NICOTINATE_AND_NICOTINAMIDE_METABOLISM		24	-0.264244	-0.921821	0.584493	0.727247	1	1933	tags=21%, list=10%, signal=23%
KEGG_PRION_DISEASES	KEGG_PRION_DISEASES		35	0.381211	1.27749	0.153992	0.364822	0.993	1267	tags=17%, list=6%, signal=18%					KEGG_ASCORBATE_AND_ALDARATE_METABOLISM	KEGG_ASCORBATE_AND_ALDARATE_METABOLISM		25	-0.317742	-0.892128	0.598765	0.762946	1	6268	tags=56%, list=32%, signal=82%
KEGG_ENDOMETRIAL_CANCER	KEGG_ENDOMETRIAL_CANCER		52	0.345824	1.24957	0.20082	0.399732	0.995	4592	tags=31%, list=24%, signal=40%					KEGG_BLADDER_CANCER	KEGG_BLADDER_CANCER		42	-0.280742	-0.889508	0.582031	0.753257	1	4155	tags=40%, list=21%, signal=51%
KEGG_TYROSINE_METABOLISM	KEGG_TYROSINE_METABOLISM		42	0.319327	1.22661	0.138211	0.425679	0.996	3066	tags=21%, list=16%, signal=25%					KEGG_RIBOFLAVIN_METABOLISM	KEGG_RIBOFLAVIN_METABOLISM		16	-0.291125	-0.885962	0.594883	0.745938	1	4978	tags=50%, list=26%, signal=67%
KEGG_FC_GAMMA_R_MEDIATED_PHAGOCYTOSIS	KEGG_FC_GAMMA_R_MEDIATED_PHAGOCYTOSIS		95	0.328696	1.21693	0.2079	0.432311	0.996	3213	tags=22%, list=16%, signal=26%					KEGG_CYTOSOLIC_DNA_SENSING_PATHWAY	KEGG_CYTOSOLIC_DNA_SENSING_PATHWAY		53	-0.258508	-0.883618	0.606362	0.736284	1	5210	tags=34%, list=27%, signal=46%
KEGG_ARACHIDONIC_ACID_METABOLISM	KEGG_ARACHIDONIC_ACID_METABOLISM		57	0.331754	1.21287	0.204082	0.430795	0.996	3405	tags=21%, list=17%, signal=25%					KEGG_ANTIGEN_PROCESSING_AND_PRESENTATION	KEGG_ANTIGEN_PROCESSING_AND_PRESENTATION		80	-0.280748	-0.87722	0.584337	0.734199	1	2125	tags=15%, list=11%, signal=17%
KEGG_FC_EPSILON_RI_SIGNALING_PATHWAY	KEGG_FC_EPSILON_RI_SIGNALING_PATHWAY		79	0.315681	1.21186	0.194726	0.425125	0.996	4150	tags=24%, list=21%, signal=30%					KEGG_PROXIMAL_TUBULE_BICARBONATE_RECLAMATION	KEGG_PROXIMAL_TUBULE_BICARBONATE_RECLAMATION		23	-0.288102	-0.849194	0.639344	0.765608	1	4319	tags=39%, list=22%, signal=50%
KEGG_PROSTATE_CANCER	KEGG_PROSTATE_CANCER		89	0.302693	1.18966	0.231537	0.451206	0.998	3469	tags=22%, list=18%, signal=27%					KEGG_SNARE_INTERACTIONS_IN_VESICULAR_TRANSPORT	KEGG_SNARE_INTERACTIONS_IN_VESICULAR_TRANSPORT		38	-0.222954	-0.84763	0.702495	0.754999	1	771	tags=13%, list=4%, signal=14%
KEGG_TASTE_TRANSDUCTION	KEGG_TASTE_TRANSDUCTION		51	0.411208	1.17868	0.284274	0.460534	0.999	7581	tags=51%, list=39%, signal=83%					KEGG_SPHINGOLIPID_METABOLISM	KEGG_SPHINGOLIPID_METABOLISM		39	-0.245818	-0.797707	0.698152	0.822859	1	5031	tags=44%, list=26%, signal=59%
KEGG_TYPE_II_DIABETES_MELLITUS	KEGG_TYPE_II_DIABETES_MELLITUS		47	0.334551	1.16616	0.222892	0.472829	0.999	3512	tags=26%, list=18%, signal=31%					KEGG_BIOSYNTHESIS_OF_UNSATURATED_FATTY_ACIDS	KEGG_BIOSYNTHESIS_OF_UNSATURATED_FATTY_ACIDS		22	-0.26672	-0.797459	0.730693	0.809723	1	2938	tags=36%, list=15%, signal=43%
KEGG_SYSTEMIC_LUPUS_ERYTHEMATOSUS	KEGG_SYSTEMIC_LUPUS_ERYTHEMATOSUS		55	0.408589	1.15711	0.307102	0.47922	0.999	3501	tags=24%, list=18%, signal=29%					KEGG_THYROID_CANCER	KEGG_THYROID_CANCER		29	-0.235781	-0.764853	0.756917	0.846489	1	4155	tags=45%, list=21%, signal=57%
KEGG_GLYCOSAMINOGLYCAN_BIOSYNTHESIS_HEPARAN_SULFATE	KEGG_GLYCOSAMINOGLYCAN_BIOSYNTHESIS_HEPARAN_SULFATE		26	0.393742	1.15448	0.296296	0.475941	0.999	4383	tags=31%, list=22%, signal=40%					KEGG_LYSINE_DEGRADATION	KEGG_LYSINE_DEGRADATION		44	-0.228523	-0.731703	0.747573	0.881642	1	2516	tags=20%, list=13%, signal=23%
KEGG_TRYPTOPHAN_METABOLISM	KEGG_TRYPTOPHAN_METABOLISM		39	0.321908	1.13264	0.283133	0.50371	0.999	1915	tags=13%, list=10%, signal=14%					KEGG_NITROGEN_METABOLISM	KEGG_NITROGEN_METABOLISM		23	-0.222106	-0.694026	0.913131	0.918716	1	4319	tags=35%, list=22%, signal=45%
KEGG_SMALL_CELL_LUNG_CANCER	KEGG_SMALL_CELL_LUNG_CANCER		84	0.30105	1.11949	0.335953	0.516373	0.999	4670	tags=32%, list=24%, signal=42%					KEGG_STARCH_AND_SUCROSE_METABOLISM	KEGG_STARCH_AND_SUCROSE_METABOLISM		51	-0.199226	-0.693562	0.896414	0.90517	1	6299	tags=43%, list=32%, signal=64%
KEGG_T_CELL_RECEPTOR_SIGNALING_PATHWAY	KEGG_T_CELL_RECEPTOR_SIGNALING_PATHWAY		108	0.301228	1.10176	0.34902	0.536546	0.999	6145	tags=39%, list=32%, signal=56%					KEGG_UBIQUITIN_MEDIATED_PROTEOLYSIS	KEGG_UBIQUITIN_MEDIATED_PROTEOLYSIS		133	-0.16492	-0.631211	0.879684	0.961504	1	4972	tags=33%, list=25%, signal=44%
KEGG_GLYCOSAMINOGLYCAN_DEGRADATION	KEGG_GLYCOSAMINOGLYCAN_DEGRADATION		21	0.380906	1.10108	0.356	0.52966	0.999	4493	tags=33%, list=23%, signal=43%					KEGG_RETINOL_METABOLISM	KEGG_RETINOL_METABOLISM		64	-0.192966	-0.596396	0.93014	0.977874	1	5771	tags=42%, list=30%, signal=60%
KEGG_PHENYLALANINE_METABOLISM	KEGG_PHENYLALANINE_METABOLISM		18	0.330712	1.09512	0.295833	0.531443	1	3066	tags=22%, list=16%, signal=26%					KEGG_OTHER_GLYCAN_DEGRADATION	KEGG_OTHER_GLYCAN_DEGRADATION		16	-0.221828	-0.558995	0.912424	0.989474	1	4431	tags=31%, list=23%, signal=40%
KEGG_GLYCEROLIPID_METABOLISM	KEGG_GLYCEROLIPID_METABOLISM		48	0.302627	1.06832	0.356855	0.567676	1	2829	tags=19%, list=15%, signal=22%					KEGG_STEROID_HORMONE_BIOSYNTHESIS	KEGG_STEROID_HORMONE_BIOSYNTHESIS		55	-0.159992	-0.528918	0.974308	0.990453	1	4944	tags=35%, list=25%, signal=46%
KEGG_AMYOTROPHIC_LATERAL_SCLEROSIS_ALS	KEGG_AMYOTROPHIC_LATERAL_SCLEROSIS_ALS		52	0.26119	1.06537	0.360225	0.564536	1	2315	tags=17%, list=12%, signal=20%					KEGG_FATTY_ACID_METABOLISM	KEGG_FATTY_ACID_METABOLISM		42	-0.169479	-0.520837	0.967546	0.97992	1	5017	tags=36%, list=26%, signal=48%
KEGG_PROGESTERONE_MEDIATED_OOCYTE_MATURATION	KEGG_PROGESTERONE_MEDIATED_OOCYTE_MATURATION		85	0.271602	1.06494	0.382766	0.557355	1	3979	tags=29%, list=20%, signal=37%					KEGG_LINOLEIC_ACID_METABOLISM	KEGG_LINOLEIC_ACID_METABOLISM		29	-0.18112	-0.518417	0.976744	0.966998	1	5214	tags=38%, list=27%, signal=52%
KEGG_VIRAL_MYOCARDITIS	KEGG_VIRAL_MYOCARDITIS		68	0.317663	1.05169	0.381323	0.57061	1	2856	tags=18%, list=15%, signal=21%
KEGG_APOPTOSIS	KEGG_APOPTOSIS		86	0.271573	1.03256	0.404762	0.593958	1	3499	tags=21%, list=18%, signal=25%
KEGG_INTESTINAL_IMMUNE_NETWORK_FOR_IGA_PRODUCTION	KEGG_INTESTINAL_IMMUNE_NETWORK_FOR_IGA_PRODUCTION		46	0.385849	1.02764	0.417457	0.593039	1	6264	tags=39%, list=32%, signal=58%
KEGG_NON_SMALL_CELL_LUNG_CANCER	KEGG_NON_SMALL_CELL_LUNG_CANCER		54	0.268183	0.969224	0.479757	0.681374	1	6133	tags=37%, list=31%, signal=54%
KEGG_CHRONIC_MYELOID_LEUKEMIA	KEGG_CHRONIC_MYELOID_LEUKEMIA		73	0.266687	0.964793	0.467347	0.679985	1	5777	tags=34%, list=30%, signal=48%
KEGG_HISTIDINE_METABOLISM	KEGG_HISTIDINE_METABOLISM		29	0.282157	0.963802	0.508911	0.672609	1	2899	tags=17%, list=15%, signal=20%
KEGG_BETA_ALANINE_METABOLISM	KEGG_BETA_ALANINE_METABOLISM		22	0.309675	0.958447	0.527721	0.672584	1	3032	tags=18%, list=16%, signal=22%
KEGG_ETHER_LIPID_METABOLISM	KEGG_ETHER_LIPID_METABOLISM		33	0.283934	0.954372	0.514852	0.671555	1	4869	tags=30%, list=25%, signal=40%
KEGG_OLFACTORY_TRANSDUCTION	KEGG_OLFACTORY_TRANSDUCTION		371	0.367785	0.951347	0.544031	0.667764	1	9821	tags=64%, list=50%, signal=127%
KEGG_PPAR_SIGNALING_PATHWAY	KEGG_PPAR_SIGNALING_PATHWAY		69	0.294453	0.947634	0.491489	0.665612	1	3032	tags=20%, list=16%, signal=24%
KEGG_GLYCEROPHOSPHOLIPID_METABOLISM	KEGG_GLYCEROPHOSPHOLIPID_METABOLISM		77	0.240601	0.94364	0.546371	0.663669	1	4223	tags=25%, list=22%, signal=31%
KEGG_CARDIAC_MUSCLE_CONTRACTION	KEGG_CARDIAC_MUSCLE_CONTRACTION		73	0.275544	0.92894	0.530864	0.678903	1	1807	tags=18%, list=9%, signal=20%
KEGG_LEISHMANIA_INFECTION	KEGG_LEISHMANIA_INFECTION		68	0.306588	0.928415	0.526316	0.6719	1	4670	tags=25%, list=24%, signal=33%
KEGG_ALPHA_LINOLENIC_ACID_METABOLISM	KEGG_ALPHA_LINOLENIC_ACID_METABOLISM		19	0.312163	0.927747	0.568898	0.665097	1	4767	tags=26%, list=24%, signal=35%
KEGG_TOLL_LIKE_RECEPTOR_SIGNALING_PATHWAY	KEGG_TOLL_LIKE_RECEPTOR_SIGNALING_PATHWAY		101	0.257754	0.925713	0.54386	0.660954	1	6942	tags=37%, list=36%, signal=57%
KEGG_PANCREATIC_CANCER	KEGG_PANCREATIC_CANCER		70	0.241491	0.893015	0.596674	0.704084	1	3289	tags=17%, list=17%, signal=21%
KEGG_ASTHMA	KEGG_ASTHMA		28	0.370672	0.889962	0.568401	0.700897	1	8576	tags=46%, list=44%, signal=83%
KEGG_GLYCOSAMINOGLYCAN_BIOSYNTHESIS_KERATAN_SULFATE	KEGG_GLYCOSAMINOGLYCAN_BIOSYNTHESIS_KERATAN_SULFATE		15	0.334781	0.880455	0.634615	0.70724	1	4184	tags=27%, list=21%, signal=34%
KEGG_NATURAL_KILLER_CELL_MEDIATED_CYTOTOXICITY	KEGG_NATURAL_KILLER_CELL_MEDIATED_CYTOTOXICITY		131	0.235182	0.865349	0.63189	0.722372	1	6334	tags=31%, list=32%, signal=46%
KEGG_EPITHELIAL_CELL_SIGNALING_IN_HELICOBACTER_PYLORI_INFECTION	KEGG_EPITHELIAL_CELL_SIGNALING_IN_HELICOBACTER_PYLORI_INFECTION		68	0.224659	0.859373	0.646465	0.723674	1	4936	tags=22%, list=25%, signal=29%
KEGG_RIG_I_LIKE_RECEPTOR_SIGNALING_PATHWAY	KEGG_RIG_I_LIKE_RECEPTOR_SIGNALING_PATHWAY		70	0.215914	0.807982	0.707317	0.79505	1	8576	tags=50%, list=44%, signal=89%
KEGG_GLYCOSPHINGOLIPID_BIOSYNTHESIS_LACTO_AND_NEOLACTO_SERIES	KEGG_GLYCOSPHINGOLIPID_BIOSYNTHESIS_LACTO_AND_NEOLACTO_SERIES		26	0.248833	0.804926	0.71785	0.791108	1	717	tags=8%, list=4%, signal=8%
KEGG_B_CELL_RECEPTOR_SIGNALING_PATHWAY	KEGG_B_CELL_RECEPTOR_SIGNALING_PATHWAY		75	0.239807	0.767411	0.707171	0.839127	1	6118	tags=31%, list=31%, signal=45%
KEGG_REGULATION_OF_AUTOPHAGY	KEGG_REGULATION_OF_AUTOPHAGY		34	0.251408	0.765676	0.755467	0.832459	1	9114	tags=62%, list=47%, signal=116%
KEGG_AUTOIMMUNE_THYROID_DISEASE	KEGG_AUTOIMMUNE_THYROID_DISEASE		50	0.283121	0.7622	0.686047	0.828995	1	8574	tags=42%, list=44%, signal=75%
KEGG_NOTCH_SIGNALING_PATHWAY	KEGG_NOTCH_SIGNALING_PATHWAY		47	0.224222	0.760687	0.767068	0.822748	1	5551	tags=32%, list=28%, signal=45%
KEGG_O_GLYCAN_BIOSYNTHESIS	KEGG_O_GLYCAN_BIOSYNTHESIS		30	0.257849	0.754735	0.764587	0.82293	1	4384	tags=20%, list=22%, signal=26%
KEGG_DRUG_METABOLISM_CYTOCHROME_P450	KEGG_DRUG_METABOLISM_CYTOCHROME_P450		70	0.237646	0.754492	0.764	0.814933	1	1130	tags=9%, list=6%, signal=9%
KEGG_METABOLISM_OF_XENOBIOTICS_BY_CYTOCHROME_P450	KEGG_METABOLISM_OF_XENOBIOTICS_BY_CYTOCHROME_P450		68	0.236356	0.73823	0.759296	0.828718	1	1130	tags=7%, list=6%, signal=8%
KEGG_PROPANOATE_METABOLISM	KEGG_PROPANOATE_METABOLISM		32	0.268308	0.737809	0.723108	0.82108	1	3032	tags=16%, list=16%, signal=18%
KEGG_ALLOGRAFT_REJECTION	KEGG_ALLOGRAFT_REJECTION		35	0.25917	0.603637	0.823643	0.960658	1	8576	tags=40%, list=44%, signal=71%
KEGG_LYSOSOME	KEGG_LYSOSOME		121	0.15057	0.53836	0.962151	0.993201	1	5011	tags=19%, list=26%, signal=25%
KEGG_GRAFT_VERSUS_HOST_DISEASE	KEGG_GRAFT_VERSUS_HOST_DISEASE		37	0.230224	0.538144	0.888446	0.983722	1	15022	tags=100%, list=77%, signal=434%
KEGG_NOD_LIKE_RECEPTOR_SIGNALING_PATHWAY	KEGG_NOD_LIKE_RECEPTOR_SIGNALING_PATHWAY		62	0.162612	0.535331	0.964775	0.975492	1	7833	tags=44%, list=40%, signal=73%
KEGG_TYPE_I_DIABETES_MELLITUS	KEGG_TYPE_I_DIABETES_MELLITUS		41	0.20205	0.512327	0.938104	0.976155	1	4256	tags=15%, list=22%, signal=19%
KEGG_PRIMARY_IMMUNODEFICIENCY	KEGG_PRIMARY_IMMUNODEFICIENCY		35	0.198897	0.463709	0.952941	0.981795	1	5949	tags=29%, list=30%, signal=41%

## Sheet: GMDS
HIGH															LOW
NAME	GS<br> follow link to MSigDB	GS DETAILS	SIZE	ES	NES	NOM p-val	FDR q-val	FWER p-val	RANK AT MAX	LEADING EDGE					NAME	GS<br> follow link to MSigDB	GS DETAILS	SIZE	ES	NES	NOM p-val	FDR q-val	FWER p-val	RANK AT MAX	LEADING EDGE
KEGG_N_GLYCAN_BIOSYNTHESIS	KEGG_N_GLYCAN_BIOSYNTHESIS	Details ...	46	0.679537	2.10447	0	0.0271233	0.014	2859	tags=59%, list=15%, signal=69%					KEGG_VASCULAR_SMOOTH_MUSCLE_CONTRACTION	KEGG_VASCULAR_SMOOTH_MUSCLE_CONTRACTION	Details ...	115	-0.47024	-1.68767	0.0339321	1	0.514	3145	tags=37%, list=16%, signal=44%
KEGG_FRUCTOSE_AND_MANNOSE_METABOLISM	KEGG_FRUCTOSE_AND_MANNOSE_METABOLISM	Details ...	34	0.672106	1.96272	0	0.0480814	0.053	1579	tags=41%, list=8%, signal=45%					KEGG_DILATED_CARDIOMYOPATHY	KEGG_DILATED_CARDIOMYOPATHY	Details ...	90	-0.486737	-1.67441	0.0196078	0.877813	0.541	2418	tags=33%, list=12%, signal=38%
KEGG_AMINO_SUGAR_AND_NUCLEOTIDE_SUGAR_METABOLISM	KEGG_AMINO_SUGAR_AND_NUCLEOTIDE_SUGAR_METABOLISM	Details ...	44	0.579556	1.93971	0.0077821	0.0421439	0.068	2295	tags=41%, list=12%, signal=46%					KEGG_HYPERTROPHIC_CARDIOMYOPATHY_HCM	KEGG_HYPERTROPHIC_CARDIOMYOPATHY_HCM	Details ...	83	-0.46909	-1.57917	0.04	1	0.735	2171	tags=31%, list=11%, signal=35%
KEGG_PEROXISOME	KEGG_PEROXISOME	Details ...	78	0.517631	1.86306	0.00568182	0.0808551	0.175	4315	tags=53%, list=22%, signal=67%					KEGG_CALCIUM_SIGNALING_PATHWAY	KEGG_CALCIUM_SIGNALING_PATHWAY	Details ...	177	-0.406486	-1.55041	0.0318725	1	0.782	4955	tags=45%, list=25%, signal=60%
KEGG_MATURITY_ONSET_DIABETES_OF_THE_YOUNG	KEGG_MATURITY_ONSET_DIABETES_OF_THE_YOUNG	Details ...	25	0.745058	1.86017	0.00414938	0.0671886	0.179	3485	tags=68%, list=18%, signal=83%					KEGG_ARRHYTHMOGENIC_RIGHT_VENTRICULAR_CARDIOMYOPATHY_ARVC	KEGG_ARRHYTHMOGENIC_RIGHT_VENTRICULAR_CARDIOMYOPATHY_ARVC	Details ...	74	-0.433892	-1.5195	0.0712871	0.979917	0.836	1370	tags=28%, list=7%, signal=30%
KEGG_SPHINGOLIPID_METABOLISM	KEGG_SPHINGOLIPID_METABOLISM	Details ...	39	0.54226	1.81878	0.0019084	0.0862188	0.254	1918	tags=38%, list=10%, signal=43%					KEGG_FOCAL_ADHESION	KEGG_FOCAL_ADHESION	Details ...	199	-0.390817	-1.49247	0.0861345	0.948445	0.868	6272	tags=48%, list=32%, signal=70%
KEGG_BUTANOATE_METABOLISM	KEGG_BUTANOATE_METABOLISM	Details ...	34	0.557006	1.76675	0.0139165	0.126424	0.367	2535	tags=50%, list=13%, signal=57%					KEGG_REGULATION_OF_ACTIN_CYTOSKELETON	KEGG_REGULATION_OF_ACTIN_CYTOSKELETON	Details ...	212	-0.343279	-1.46763	0.0385396	0.927348	0.897	5538	tags=42%, list=28%, signal=58%
KEGG_GLUTATHIONE_METABOLISM	KEGG_GLUTATHIONE_METABOLISM	Details ...	47	0.521251	1.72643	0.0100604	0.157103	0.446	2253	tags=40%, list=12%, signal=46%					KEGG_CELL_ADHESION_MOLECULES_CAMS	KEGG_CELL_ADHESION_MOLECULES_CAMS	Details ...	130	-0.398492	-1.43036	0.103586	0.976155	0.926	5521	tags=51%, list=28%, signal=70%
KEGG_CITRATE_CYCLE_TCA_CYCLE	KEGG_CITRATE_CYCLE_TCA_CYCLE	Details ...	30	0.642178	1.69969	0.0305927	0.176714	0.509	2729	tags=50%, list=14%, signal=58%					KEGG_MAPK_SIGNALING_PATHWAY	KEGG_MAPK_SIGNALING_PATHWAY	Details ...	267	-0.336123	-1.41366	0.0735294	0.940721	0.942	3036	tags=24%, list=16%, signal=28%
KEGG_O_GLYCAN_BIOSYNTHESIS	KEGG_O_GLYCAN_BIOSYNTHESIS	Details ...	30	0.545505	1.69344	0.0286807	0.166425	0.523	1951	tags=37%, list=10%, signal=41%					KEGG_HEMATOPOIETIC_CELL_LINEAGE	KEGG_HEMATOPOIETIC_CELL_LINEAGE	Details ...	84	-0.452093	-1.39323	0.162376	0.930082	0.952	4498	tags=46%, list=23%, signal=60%
KEGG_PENTOSE_AND_GLUCURONATE_INTERCONVERSIONS	KEGG_PENTOSE_AND_GLUCURONATE_INTERCONVERSIONS	Details ...	28	0.665572	1.67815	0.0200401	0.171182	0.557	5052	tags=79%, list=26%, signal=106%					KEGG_LEUKOCYTE_TRANSENDOTHELIAL_MIGRATION	KEGG_LEUKOCYTE_TRANSENDOTHELIAL_MIGRATION	Details ...	115	-0.360137	-1.39229	0.0777096	0.849062	0.953	3856	tags=34%, list=20%, signal=42%
KEGG_RETINOL_METABOLISM	KEGG_RETINOL_METABOLISM	Details ...	64	0.59441	1.67307	0.0247423	0.163034	0.57	4962	tags=64%, list=25%, signal=86%					KEGG_GLYCOSAMINOGLYCAN_BIOSYNTHESIS_CHONDROITIN_SULFATE	KEGG_GLYCOSAMINOGLYCAN_BIOSYNTHESIS_CHONDROITIN_SULFATE	Details ...	22	-0.472732	-1.36999	0.160079	0.866642	0.969	5810	tags=59%, list=30%, signal=84%
KEGG_DRUG_METABOLISM_OTHER_ENZYMES	KEGG_DRUG_METABOLISM_OTHER_ENZYMES	Details ...	51	0.557772	1.67154	0.0141988	0.152675	0.571	4876	tags=55%, list=25%, signal=73%					KEGG_TGF_BETA_SIGNALING_PATHWAY	KEGG_TGF_BETA_SIGNALING_PATHWAY	Details ...	85	-0.369887	-1.34387	0.142857	0.895303	0.981	4057	tags=34%, list=21%, signal=43%
KEGG_FATTY_ACID_METABOLISM	KEGG_FATTY_ACID_METABOLISM	Details ...	42	0.547307	1.65695	0.0428016	0.157494	0.611	3575	tags=57%, list=18%, signal=70%					KEGG_GAP_JUNCTION	KEGG_GAP_JUNCTION	Details ...	89	-0.343543	-1.34204	0.129897	0.837144	0.981	5229	tags=38%, list=27%, signal=52%
KEGG_ALZHEIMERS_DISEASE	KEGG_ALZHEIMERS_DISEASE	Details ...	157	0.4303	1.64342	0.0522244	0.16296	0.639	2756	tags=32%, list=14%, signal=37%					KEGG_CHEMOKINE_SIGNALING_PATHWAY	KEGG_CHEMOKINE_SIGNALING_PATHWAY	Details ...	187	-0.352802	-1.33783	0.165657	0.794682	0.981	5794	tags=48%, list=30%, signal=68%
KEGG_AMINOACYL_TRNA_BIOSYNTHESIS	KEGG_AMINOACYL_TRNA_BIOSYNTHESIS	Details ...	22	0.689483	1.63874	0.025641	0.157427	0.649	5494	tags=86%, list=28%, signal=120%					KEGG_MELANOGENESIS	KEGG_MELANOGENESIS	Details ...	101	-0.340465	-1.31613	0.139344	0.814994	0.985	5794	tags=46%, list=30%, signal=64%
KEGG_HUNTINGTONS_DISEASE	KEGG_HUNTINGTONS_DISEASE	Details ...	171	0.415988	1.61869	0.0577689	0.168361	0.687	2653	tags=27%, list=14%, signal=31%					KEGG_LONG_TERM_POTENTIATION	KEGG_LONG_TERM_POTENTIATION	Details ...	70	-0.358134	-1.30346	0.177778	0.807385	0.989	2757	tags=29%, list=14%, signal=33%
KEGG_GLYCOSPHINGOLIPID_BIOSYNTHESIS_LACTO_AND_NEOLACTO_SERIES	KEGG_GLYCOSPHINGOLIPID_BIOSYNTHESIS_LACTO_AND_NEOLACTO_SERIES	Details ...	26	0.496668	1.5769	0.0362173	0.211759	0.766	2859	tags=46%, list=15%, signal=54%					KEGG_ECM_RECEPTOR_INTERACTION	KEGG_ECM_RECEPTOR_INTERACTION	Details ...	83	-0.389762	-1.28193	0.202811	0.832089	0.992	6393	tags=57%, list=33%, signal=84%
KEGG_LINOLEIC_ACID_METABOLISM	KEGG_LINOLEIC_ACID_METABOLISM	Details ...	29	0.538734	1.57598	0.0537849	0.201484	0.767	3804	tags=48%, list=20%, signal=60%					KEGG_T_CELL_RECEPTOR_SIGNALING_PATHWAY	KEGG_T_CELL_RECEPTOR_SIGNALING_PATHWAY	Details ...	108	-0.355181	-1.25053	0.2334	0.890526	0.993	5659	tags=49%, list=29%, signal=69%
KEGG_METABOLISM_OF_XENOBIOTICS_BY_CYTOCHROME_P450	KEGG_METABOLISM_OF_XENOBIOTICS_BY_CYTOCHROME_P450	Details ...	68	0.543201	1.55664	0.0670732	0.216701	0.805	5083	tags=66%, list=26%, signal=89%					KEGG_INTESTINAL_IMMUNE_NETWORK_FOR_IGA_PRODUCTION	KEGG_INTESTINAL_IMMUNE_NETWORK_FOR_IGA_PRODUCTION	Details ...	46	-0.454895	-1.23552	0.301344	0.891926	0.994	6280	tags=61%, list=32%, signal=90%
KEGG_TERPENOID_BACKBONE_BIOSYNTHESIS	KEGG_TERPENOID_BACKBONE_BIOSYNTHESIS		15	0.663166	1.54433	0.0789981	0.222393	0.819	4125	tags=80%, list=21%, signal=101%					KEGG_SYSTEMIC_LUPUS_ERYTHEMATOSUS	KEGG_SYSTEMIC_LUPUS_ERYTHEMATOSUS		55	-0.410378	-1.2232	0.271654	0.888358	0.995	6483	tags=55%, list=33%, signal=81%
KEGG_GLYCOLYSIS_GLUCONEOGENESIS	KEGG_GLYCOLYSIS_GLUCONEOGENESIS		61	0.444003	1.53844	0.026975	0.220061	0.828	3575	tags=41%, list=18%, signal=50%					KEGG_MELANOMA	KEGG_MELANOMA		71	-0.312619	-1.22093	0.177106	0.855522	0.995	2770	tags=21%, list=14%, signal=25%
KEGG_ARGININE_AND_PROLINE_METABOLISM	KEGG_ARGININE_AND_PROLINE_METABOLISM		54	0.414715	1.50822	0.0588235	0.250653	0.878	3327	tags=39%, list=17%, signal=47%					KEGG_WNT_SIGNALING_PATHWAY	KEGG_WNT_SIGNALING_PATHWAY		150	-0.298689	-1.21454	0.207547	0.836494	0.995	4151	tags=29%, list=21%, signal=37%
KEGG_PROXIMAL_TUBULE_BICARBONATE_RECLAMATION	KEGG_PROXIMAL_TUBULE_BICARBONATE_RECLAMATION		23	0.486946	1.50003	0.0550098	0.251849	0.886	1988	tags=35%, list=10%, signal=39%					KEGG_ALLOGRAFT_REJECTION	KEGG_ALLOGRAFT_REJECTION		35	-0.491136	-1.19892	0.32882	0.845497	0.996	6754	tags=54%, list=35%, signal=83%
KEGG_ASCORBATE_AND_ALDARATE_METABOLISM	KEGG_ASCORBATE_AND_ALDARATE_METABOLISM		25	0.611657	1.49687	0.0697211	0.245655	0.888	4876	tags=76%, list=25%, signal=101%					KEGG_PRION_DISEASES	KEGG_PRION_DISEASES		35	-0.342784	-1.19067	0.230608	0.834942	0.997	4057	tags=31%, list=21%, signal=40%
KEGG_SELENOAMINO_ACID_METABOLISM	KEGG_SELENOAMINO_ACID_METABOLISM		25	0.494061	1.4918	0.0513308	0.243564	0.891	3598	tags=36%, list=18%, signal=44%					KEGG_VASOPRESSIN_REGULATED_WATER_REABSORPTION	KEGG_VASOPRESSIN_REGULATED_WATER_REABSORPTION		44	-0.333852	-1.17599	0.260081	0.843359	0.998	6083	tags=55%, list=31%, signal=79%
KEGG_GLYOXYLATE_AND_DICARBOXYLATE_METABOLISM	KEGG_GLYOXYLATE_AND_DICARBOXYLATE_METABOLISM		16	0.590017	1.49047	0.0806142	0.23587	0.892	4450	tags=56%, list=23%, signal=73%					KEGG_ADHERENS_JUNCTION	KEGG_ADHERENS_JUNCTION		73	-0.305615	-1.17235	0.286021	0.822187	0.998	4199	tags=37%, list=22%, signal=47%
KEGG_PROTEIN_EXPORT	KEGG_PROTEIN_EXPORT		23	0.535861	1.47834	0.10325	0.243686	0.908	3829	tags=52%, list=20%, signal=65%					KEGG_NEUROTROPHIN_SIGNALING_PATHWAY	KEGG_NEUROTROPHIN_SIGNALING_PATHWAY		125	-0.317288	-1.17076	0.287879	0.797066	0.998	5230	tags=38%, list=27%, signal=52%
KEGG_GLYCEROLIPID_METABOLISM	KEGG_GLYCEROLIPID_METABOLISM		48	0.399118	1.4782	0.0461538	0.235346	0.908	4010	tags=46%, list=21%, signal=58%					KEGG_PRIMARY_IMMUNODEFICIENCY	KEGG_PRIMARY_IMMUNODEFICIENCY		35	-0.471915	-1.16213	0.323017	0.791484	0.999	5659	tags=54%, list=29%, signal=76%
KEGG_ALANINE_ASPARTATE_AND_GLUTAMATE_METABOLISM	KEGG_ALANINE_ASPARTATE_AND_GLUTAMATE_METABOLISM		30	0.479166	1.46792	0.0407767	0.239212	0.918	5369	tags=60%, list=28%, signal=83%					KEGG_VIRAL_MYOCARDITIS	KEGG_VIRAL_MYOCARDITIS		68	-0.332454	-1.15765	0.294347	0.776024	0.999	6280	tags=46%, list=32%, signal=67%
KEGG_PPAR_SIGNALING_PATHWAY	KEGG_PPAR_SIGNALING_PATHWAY		69	0.406361	1.45458	0.0606654	0.248507	0.926	2458	tags=35%, list=13%, signal=40%					KEGG_SNARE_INTERACTIONS_IN_VESICULAR_TRANSPORT	KEGG_SNARE_INTERACTIONS_IN_VESICULAR_TRANSPORT		38	-0.320156	-1.14668	0.279318	0.777501	0.999	1457	tags=21%, list=7%, signal=23%
KEGG_STARCH_AND_SUCROSE_METABOLISM	KEGG_STARCH_AND_SUCROSE_METABOLISM		51	0.436772	1.44251	0.078629	0.255576	0.937	4876	tags=47%, list=25%, signal=63%					KEGG_ASTHMA	KEGG_ASTHMA		28	-0.477977	-1.14509	0.356736	0.756443	0.999	7618	tags=68%, list=39%, signal=111%
KEGG_DRUG_METABOLISM_CYTOCHROME_P450	KEGG_DRUG_METABOLISM_CYTOCHROME_P450		70	0.49532	1.43441	0.109053	0.258095	0.944	4876	tags=59%, list=25%, signal=78%					KEGG_ADIPOCYTOKINE_SIGNALING_PATHWAY	KEGG_ADIPOCYTOKINE_SIGNALING_PATHWAY		67	-0.308376	-1.14423	0.281124	0.735743	0.999	4526	tags=34%, list=23%, signal=45%
KEGG_VALINE_LEUCINE_AND_ISOLEUCINE_DEGRADATION	KEGG_VALINE_LEUCINE_AND_ISOLEUCINE_DEGRADATION		44	0.494804	1.43072	0.142023	0.254831	0.946	3174	tags=45%, list=16%, signal=54%					KEGG_PHOSPHATIDYLINOSITOL_SIGNALING_SYSTEM	KEGG_PHOSPHATIDYLINOSITOL_SIGNALING_SYSTEM		76	-0.32614	-1.11305	0.344398	0.787819	0.999	4635	tags=43%, list=24%, signal=57%
KEGG_PARKINSONS_DISEASE	KEGG_PARKINSONS_DISEASE		113	0.440583	1.43066	0.16	0.247598	0.946	2505	tags=33%, list=13%, signal=37%					KEGG_TIGHT_JUNCTION	KEGG_TIGHT_JUNCTION		131	-0.244826	-1.09209	0.301486	0.816222	0.999	947	tags=13%, list=5%, signal=14%
KEGG_PORPHYRIN_AND_CHLOROPHYLL_METABOLISM	KEGG_PORPHYRIN_AND_CHLOROPHYLL_METABOLISM		40	0.482503	1.4301	0.0945946	0.241402	0.946	4876	tags=60%, list=25%, signal=80%					KEGG_LONG_TERM_DEPRESSION	KEGG_LONG_TERM_DEPRESSION		70	-0.279703	-1.08874	0.311538	0.80186	0.999	3036	tags=24%, list=16%, signal=29%
KEGG_PENTOSE_PHOSPHATE_PATHWAY	KEGG_PENTOSE_PHOSPHATE_PATHWAY		27	0.513241	1.42633	0.10664	0.239036	0.949	2490	tags=33%, list=13%, signal=38%					KEGG_CYTOKINE_CYTOKINE_RECEPTOR_INTERACTION	KEGG_CYTOKINE_CYTOKINE_RECEPTOR_INTERACTION		262	-0.296316	-1.08674	0.366397	0.78416	0.999	3820	tags=27%, list=20%, signal=34%
KEGG_STEROID_BIOSYNTHESIS	KEGG_STEROID_BIOSYNTHESIS		17	0.610206	1.39428	0.157791	0.272204	0.965	6204	tags=76%, list=32%, signal=112%					KEGG_RENAL_CELL_CARCINOMA	KEGG_RENAL_CELL_CARCINOMA		70	-0.304659	-1.07747	0.379828	0.784891	1	5846	tags=44%, list=30%, signal=63%
KEGG_OXIDATIVE_PHOSPHORYLATION	KEGG_OXIDATIVE_PHOSPHORYLATION		116	0.452488	1.38876	0.187879	0.272543	0.968	4751	tags=47%, list=24%, signal=62%					KEGG_PATHWAYS_IN_CANCER	KEGG_PATHWAYS_IN_CANCER		325	-0.249112	-1.07629	0.34188	0.767374	1	4438	tags=29%, list=23%, signal=36%
KEGG_GLYCOSYLPHOSPHATIDYLINOSITOL_GPI_ANCHOR_BIOSYNTHESIS	KEGG_GLYCOSYLPHOSPHATIDYLINOSITOL_GPI_ANCHOR_BIOSYNTHESIS		24	0.483248	1.38055	0.147117	0.276233	0.973	5508	tags=63%, list=28%, signal=87%					KEGG_LEISHMANIA_INFECTION	KEGG_LEISHMANIA_INFECTION		68	-0.351966	-1.07558	0.385396	0.750026	1	6814	tags=54%, list=35%, signal=83%
KEGG_GLYCEROPHOSPHOLIPID_METABOLISM	KEGG_GLYCEROPHOSPHOLIPID_METABOLISM		77	0.353539	1.35551	0.114563	0.302814	0.978	4341	tags=42%, list=22%, signal=53%					KEGG_B_CELL_RECEPTOR_SIGNALING_PATHWAY	KEGG_B_CELL_RECEPTOR_SIGNALING_PATHWAY		75	-0.348886	-1.0552	0.427975	0.774112	1	5230	tags=49%, list=27%, signal=67%
KEGG_NITROGEN_METABOLISM	KEGG_NITROGEN_METABOLISM		23	0.435863	1.35516	0.104536	0.296009	0.978	3492	tags=39%, list=18%, signal=48%					KEGG_JAK_STAT_SIGNALING_PATHWAY	KEGG_JAK_STAT_SIGNALING_PATHWAY		155	-0.276622	-1.05235	0.404624	0.761224	1	6734	tags=44%, list=35%, signal=66%
KEGG_ETHER_LIPID_METABOLISM	KEGG_ETHER_LIPID_METABOLISM		33	0.402037	1.35488	0.120388	0.289473	0.978	3804	tags=39%, list=20%, signal=49%					KEGG_INSULIN_SIGNALING_PATHWAY	KEGG_INSULIN_SIGNALING_PATHWAY		137	-0.267443	-1.04858	0.390852	0.751174	1	4178	tags=26%, list=21%, signal=33%
KEGG_GALACTOSE_METABOLISM	KEGG_GALACTOSE_METABOLISM		26	0.430551	1.34806	0.130604	0.292006	0.98	1477	tags=23%, list=8%, signal=25%					KEGG_AXON_GUIDANCE	KEGG_AXON_GUIDANCE		129	-0.259746	-1.04451	0.413223	0.741808	1	4076	tags=33%, list=21%, signal=41%
KEGG_STEROID_HORMONE_BIOSYNTHESIS	KEGG_STEROID_HORMONE_BIOSYNTHESIS		55	0.432883	1.33334	0.15493	0.303661	0.983	5184	tags=51%, list=27%, signal=69%					KEGG_PROGESTERONE_MEDIATED_OOCYTE_MATURATION	KEGG_PROGESTERONE_MEDIATED_OOCYTE_MATURATION		85	-0.273418	-1.04446	0.390929	0.72536	1	4361	tags=27%, list=22%, signal=35%
KEGG_GLYCOSAMINOGLYCAN_BIOSYNTHESIS_KERATAN_SULFATE	KEGG_GLYCOSAMINOGLYCAN_BIOSYNTHESIS_KERATAN_SULFATE		15	0.48646	1.29959	0.181648	0.341673	0.987	3834	tags=47%, list=20%, signal=58%					KEGG_AUTOIMMUNE_THYROID_DISEASE	KEGG_AUTOIMMUNE_THYROID_DISEASE		50	-0.405431	-1.04169	0.433594	0.715397	1	6754	tags=44%, list=35%, signal=67%
KEGG_BASE_EXCISION_REPAIR	KEGG_BASE_EXCISION_REPAIR		33	0.520853	1.29221	0.218	0.34434	0.989	5348	tags=55%, list=27%, signal=75%					KEGG_GLYCOSPHINGOLIPID_BIOSYNTHESIS_GANGLIO_SERIES	KEGG_GLYCOSPHINGOLIPID_BIOSYNTHESIS_GANGLIO_SERIES		15	-0.381287	-1.03764	0.422619	0.707472	1	5626	tags=53%, list=29%, signal=75%
KEGG_PANTOTHENATE_AND_COA_BIOSYNTHESIS	KEGG_PANTOTHENATE_AND_COA_BIOSYNTHESIS		16	0.449755	1.28367	0.159774	0.349196	0.992	4964	tags=50%, list=25%, signal=67%					KEGG_ACUTE_MYELOID_LEUKEMIA	KEGG_ACUTE_MYELOID_LEUKEMIA		57	-0.304417	-1.02538	0.408602	0.717036	1	5919	tags=46%, list=30%, signal=65%
KEGG_BIOSYNTHESIS_OF_UNSATURATED_FATTY_ACIDS	KEGG_BIOSYNTHESIS_OF_UNSATURATED_FATTY_ACIDS		22	0.399484	1.27978	0.177515	0.348149	0.992	1614	tags=36%, list=8%, signal=40%					KEGG_INOSITOL_PHOSPHATE_METABOLISM	KEGG_INOSITOL_PHOSPHATE_METABOLISM		54	-0.299541	-1.02339	0.422594	0.706202	1	4635	tags=39%, list=24%, signal=51%
KEGG_TRYPTOPHAN_METABOLISM	KEGG_TRYPTOPHAN_METABOLISM		39	0.345029	1.27002	0.153996	0.353877	0.994	2978	tags=31%, list=15%, signal=36%					KEGG_REGULATION_OF_AUTOPHAGY	KEGG_REGULATION_OF_AUTOPHAGY		34	-0.370199	-1.02214	0.486111	0.694282	1	2338	tags=18%, list=12%, signal=20%
KEGG_PYRUVATE_METABOLISM	KEGG_PYRUVATE_METABOLISM		40	0.373444	1.26044	0.199241	0.359462	0.995	2245	tags=33%, list=12%, signal=37%					KEGG_PATHOGENIC_ESCHERICHIA_COLI_INFECTION	KEGG_PATHOGENIC_ESCHERICHIA_COLI_INFECTION		55	-0.275534	-1.01947	0.445607	0.685081	1	4428	tags=31%, list=23%, signal=40%
KEGG_PROTEASOME	KEGG_PROTEASOME		44	0.516069	1.25446	0.291925	0.360482	0.995	5263	tags=55%, list=27%, signal=75%					KEGG_OOCYTE_MEIOSIS	KEGG_OOCYTE_MEIOSIS		112	-0.261094	-1.01639	0.420502	0.677523	1	3564	tags=22%, list=18%, signal=27%
KEGG_THYROID_CANCER	KEGG_THYROID_CANCER		29	0.392012	1.25089	0.21673	0.35811	0.995	900	tags=21%, list=5%, signal=22%					KEGG_BASAL_CELL_CARCINOMA	KEGG_BASAL_CELL_CARCINOMA		55	-0.285418	-1.0146	0.429719	0.668122	1	4151	tags=33%, list=21%, signal=41%
KEGG_PROPANOATE_METABOLISM	KEGG_PROPANOATE_METABOLISM		32	0.423486	1.24013	0.247148	0.367054	0.997	2535	tags=34%, list=13%, signal=39%					KEGG_NEUROACTIVE_LIGAND_RECEPTOR_INTERACTION	KEGG_NEUROACTIVE_LIGAND_RECEPTOR_INTERACTION		271	-0.319907	-1.0097	0.473684	0.664251	1	4955	tags=34%, list=25%, signal=45%
KEGG_HISTIDINE_METABOLISM	KEGG_HISTIDINE_METABOLISM		29	0.348526	1.23712	0.172023	0.364283	0.997	3021	tags=31%, list=15%, signal=37%					KEGG_MTOR_SIGNALING_PATHWAY	KEGG_MTOR_SIGNALING_PATHWAY		51	-0.291346	-0.997429	0.453222	0.674571	1	3033	tags=25%, list=16%, signal=30%
KEGG_PYRIMIDINE_METABOLISM	KEGG_PYRIMIDINE_METABOLISM		98	0.372224	1.23479	0.270751	0.360503	0.997	4633	tags=37%, list=24%, signal=48%					KEGG_GLIOMA	KEGG_GLIOMA		65	-0.281583	-0.987638	0.45354	0.68058	1	5230	tags=34%, list=27%, signal=46%
KEGG_P53_SIGNALING_PATHWAY	KEGG_P53_SIGNALING_PATHWAY		68	0.365927	1.2059	0.264762	0.391411	0.999	4862	tags=46%, list=25%, signal=61%					KEGG_HEDGEHOG_SIGNALING_PATHWAY	KEGG_HEDGEHOG_SIGNALING_PATHWAY		56	-0.273744	-0.986888	0.436992	0.66982	1	5939	tags=41%, list=30%, signal=59%
KEGG_PRIMARY_BILE_ACID_BIOSYNTHESIS	KEGG_PRIMARY_BILE_ACID_BIOSYNTHESIS		16	0.438675	1.20081	0.239085	0.391939	0.999	2977	tags=38%, list=15%, signal=44%					KEGG_ERBB_SIGNALING_PATHWAY	KEGG_ERBB_SIGNALING_PATHWAY		87	-0.265861	-0.982804	0.473333	0.665268	1	4833	tags=31%, list=25%, signal=41%
KEGG_VIBRIO_CHOLERAE_INFECTION	KEGG_VIBRIO_CHOLERAE_INFECTION		54	0.312045	1.19383	0.204868	0.394011	0.999	1246	tags=19%, list=6%, signal=20%					KEGG_TOLL_LIKE_RECEPTOR_SIGNALING_PATHWAY	KEGG_TOLL_LIKE_RECEPTOR_SIGNALING_PATHWAY		101	-0.255701	-0.98063	0.468208	0.657436	1	6440	tags=43%, list=33%, signal=63%
KEGG_ALPHA_LINOLENIC_ACID_METABOLISM	KEGG_ALPHA_LINOLENIC_ACID_METABOLISM		19	0.398772	1.18977	0.247505	0.392317	0.999	6179	tags=63%, list=32%, signal=92%					KEGG_SMALL_CELL_LUNG_CANCER	KEGG_SMALL_CELL_LUNG_CANCER		84	-0.26065	-0.942608	0.50324	0.708434	1	4526	tags=32%, list=23%, signal=42%
KEGG_OTHER_GLYCAN_DEGRADATION	KEGG_OTHER_GLYCAN_DEGRADATION		16	0.482166	1.18678	0.314961	0.39019	0.999	5978	tags=56%, list=31%, signal=81%					KEGG_EPITHELIAL_CELL_SIGNALING_IN_HELICOBACTER_PYLORI_INFECTION	KEGG_EPITHELIAL_CELL_SIGNALING_IN_HELICOBACTER_PYLORI_INFECTION		68	-0.24168	-0.929746	0.535032	0.717722	1	3892	tags=25%, list=20%, signal=31%
KEGG_GLYCINE_SERINE_AND_THREONINE_METABOLISM	KEGG_GLYCINE_SERINE_AND_THREONINE_METABOLISM		31	0.351296	1.16786	0.254	0.409287	1	5731	tags=58%, list=29%, signal=82%					KEGG_ENDOCYTOSIS	KEGG_ENDOCYTOSIS		181	-0.21588	-0.929217	0.565126	0.707096	1	4706	tags=30%, list=24%, signal=40%
KEGG_ARACHIDONIC_ACID_METABOLISM	KEGG_ARACHIDONIC_ACID_METABOLISM		57	0.337284	1.16504	0.257085	0.406984	1	2297	tags=26%, list=12%, signal=30%					KEGG_NOD_LIKE_RECEPTOR_SIGNALING_PATHWAY	KEGG_NOD_LIKE_RECEPTOR_SIGNALING_PATHWAY		62	-0.258349	-0.924319	0.515337	0.704456	1	4526	tags=32%, list=23%, signal=42%
KEGG_NICOTINATE_AND_NICOTINAMIDE_METABOLISM	KEGG_NICOTINATE_AND_NICOTINAMIDE_METABOLISM		24	0.336703	1.16046	0.258893	0.406457	1	3566	tags=33%, list=18%, signal=41%					KEGG_NATURAL_KILLER_CELL_MEDIATED_CYTOTOXICITY	KEGG_NATURAL_KILLER_CELL_MEDIATED_CYTOTOXICITY		131	-0.245529	-0.918293	0.543726	0.702436	1	5797	tags=34%, list=30%, signal=47%
KEGG_CARDIAC_MUSCLE_CONTRACTION	KEGG_CARDIAC_MUSCLE_CONTRACTION		73	0.331311	1.13309	0.286325	0.435659	1	2505	tags=32%, list=13%, signal=36%					KEGG_GNRH_SIGNALING_PATHWAY	KEGG_GNRH_SIGNALING_PATHWAY		101	-0.221756	-0.900466	0.586777	0.720332	1	4909	tags=28%, list=25%, signal=37%
KEGG_CYSTEINE_AND_METHIONINE_METABOLISM	KEGG_CYSTEINE_AND_METHIONINE_METABOLISM		34	0.343381	1.10979	0.312253	0.461932	1	5731	tags=44%, list=29%, signal=62%					KEGG_DORSO_VENTRAL_AXIS_FORMATION	KEGG_DORSO_VENTRAL_AXIS_FORMATION		24	-0.278395	-0.885038	0.593291	0.734814	1	5229	tags=38%, list=27%, signal=51%
KEGG_AMYOTROPHIC_LATERAL_SCLEROSIS_ALS	KEGG_AMYOTROPHIC_LATERAL_SCLEROSIS_ALS		52	0.280888	1.10294	0.291585	0.465333	1	2491	tags=25%, list=13%, signal=29%					KEGG_CHRONIC_MYELOID_LEUKEMIA	KEGG_CHRONIC_MYELOID_LEUKEMIA		73	-0.260458	-0.884816	0.535032	0.724252	1	5919	tags=41%, list=30%, signal=59%
KEGG_ABC_TRANSPORTERS	KEGG_ABC_TRANSPORTERS		44	0.324483	1.08631	0.355828	0.48124	1	2369	tags=20%, list=12%, signal=23%					KEGG_RENIN_ANGIOTENSIN_SYSTEM	KEGG_RENIN_ANGIOTENSIN_SYSTEM		17	-0.310373	-0.879427	0.629555	0.722046	1	2327	tags=24%, list=12%, signal=27%
KEGG_RIBOFLAVIN_METABOLISM	KEGG_RIBOFLAVIN_METABOLISM		16	0.351524	1.06053	0.389691	0.511107	1	7245	tags=63%, list=37%, signal=99%					KEGG_TYPE_I_DIABETES_MELLITUS	KEGG_TYPE_I_DIABETES_MELLITUS		41	-0.322821	-0.873139	0.562992	0.721621	1	6754	tags=46%, list=35%, signal=71%
KEGG_ALDOSTERONE_REGULATED_SODIUM_REABSORPTION	KEGG_ALDOSTERONE_REGULATED_SODIUM_REABSORPTION		42	0.292688	1.05604	0.358369	0.510081	1	5225	tags=45%, list=27%, signal=62%					KEGG_FC_EPSILON_RI_SIGNALING_PATHWAY	KEGG_FC_EPSILON_RI_SIGNALING_PATHWAY		79	-0.227942	-0.862828	0.645875	0.726517	1	5457	tags=37%, list=28%, signal=51%
KEGG_TYROSINE_METABOLISM	KEGG_TYROSINE_METABOLISM		42	0.273139	1.05329	0.367265	0.506717	1	2299	tags=21%, list=12%, signal=24%					KEGG_GRAFT_VERSUS_HOST_DISEASE	KEGG_GRAFT_VERSUS_HOST_DISEASE		37	-0.349103	-0.857174	0.608527	0.725377	1	8171	tags=57%, list=42%, signal=97%
KEGG_PHENYLALANINE_METABOLISM	KEGG_PHENYLALANINE_METABOLISM		18	0.299525	1.03454	0.421756	0.526573	1	671	tags=17%, list=3%, signal=17%					KEGG_COLORECTAL_CANCER	KEGG_COLORECTAL_CANCER		62	-0.240569	-0.853246	0.619748	0.721362	1	4361	tags=26%, list=22%, signal=33%
KEGG_ONE_CARBON_POOL_BY_FOLATE	KEGG_ONE_CARBON_POOL_BY_FOLATE		17	0.420625	1.01357	0.474708	0.549439	1	5494	tags=53%, list=28%, signal=74%					KEGG_TYPE_II_DIABETES_MELLITUS	KEGG_TYPE_II_DIABETES_MELLITUS		47	-0.237801	-0.852143	0.695021	0.713456	1	5507	tags=40%, list=28%, signal=56%
KEGG_BETA_ALANINE_METABOLISM	KEGG_BETA_ALANINE_METABOLISM		22	0.311992	0.964822	0.502868	0.61336	1	4656	tags=41%, list=24%, signal=54%					KEGG_FC_GAMMA_R_MEDIATED_PHAGOCYTOSIS	KEGG_FC_GAMMA_R_MEDIATED_PHAGOCYTOSIS		95	-0.233738	-0.841768	0.646217	0.719283	1	4581	tags=35%, list=23%, signal=45%
KEGG_LYSOSOME	KEGG_LYSOSOME		121	0.281051	0.96051	0.476096	0.611826	1	3909	tags=32%, list=20%, signal=40%					KEGG_NON_SMALL_CELL_LUNG_CANCER	KEGG_NON_SMALL_CELL_LUNG_CANCER		54	-0.238667	-0.839218	0.638298	0.713492	1	5230	tags=35%, list=27%, signal=48%
KEGG_MISMATCH_REPAIR	KEGG_MISMATCH_REPAIR		23	0.402389	0.956191	0.526214	0.61065	1	4252	tags=35%, list=22%, signal=44%					KEGG_PROSTATE_CANCER	KEGG_PROSTATE_CANCER		89	-0.213562	-0.83445	0.66242	0.71199	1	5761	tags=33%, list=30%, signal=46%
KEGG_LYSINE_DEGRADATION	KEGG_LYSINE_DEGRADATION		44	0.304034	0.95397	0.521401	0.60609	1	2535	tags=23%, list=13%, signal=26%					KEGG_PANCREATIC_CANCER	KEGG_PANCREATIC_CANCER		70	-0.215072	-0.789621	0.742004	0.769165	1	5761	tags=34%, list=30%, signal=48%
KEGG_RNA_DEGRADATION	KEGG_RNA_DEGRADATION		57	0.318576	0.933863	0.531128	0.626935	1	6531	tags=54%, list=33%, signal=82%					KEGG_RIBOSOME	KEGG_RIBOSOME		87	-0.277985	-0.676394	0.740519	0.911567	1	8585	tags=59%, list=44%, signal=104%
KEGG_PURINE_METABOLISM	KEGG_PURINE_METABOLISM		157	0.207987	0.922822	0.566219	0.635642	1	3566	tags=25%, list=18%, signal=30%					KEGG_BASAL_TRANSCRIPTION_FACTORS	KEGG_BASAL_TRANSCRIPTION_FACTORS		35	-0.208911	-0.65875	0.849794	0.921044	1	471	tags=6%, list=2%, signal=6%
KEGG_RNA_POLYMERASE	KEGG_RNA_POLYMERASE		29	0.303205	0.896647	0.564961	0.665145	1	5484	tags=41%, list=28%, signal=57%					KEGG_COMPLEMENT_AND_COAGULATION_CASCADES	KEGG_COMPLEMENT_AND_COAGULATION_CASCADES		69	-0.195446	-0.657455	0.856299	0.910935	1	4718	tags=28%, list=24%, signal=36%
KEGG_GLYCOSAMINOGLYCAN_DEGRADATION	KEGG_GLYCOSAMINOGLYCAN_DEGRADATION		21	0.299627	0.889906	0.600406	0.666771	1	2159	tags=24%, list=11%, signal=27%					KEGG_TASTE_TRANSDUCTION	KEGG_TASTE_TRANSDUCTION		51	-0.233385	-0.623713	0.866142	0.933796	1	6284	tags=37%, list=32%, signal=55%
KEGG_DNA_REPLICATION	KEGG_DNA_REPLICATION		36	0.383264	0.86616	0.623247	0.693315	1	5816	tags=50%, list=30%, signal=71%					KEGG_RIG_I_LIKE_RECEPTOR_SIGNALING_PATHWAY	KEGG_RIG_I_LIKE_RECEPTOR_SIGNALING_PATHWAY		70	-0.152756	-0.58042	0.975926	0.956247	1	4929	tags=21%, list=25%, signal=29%
KEGG_HOMOLOGOUS_RECOMBINATION	KEGG_HOMOLOGOUS_RECOMBINATION		28	0.329498	0.863926	0.589041	0.688498	1	4261	tags=36%, list=22%, signal=46%					KEGG_GLYCOSAMINOGLYCAN_BIOSYNTHESIS_HEPARAN_SULFATE	KEGG_GLYCOSAMINOGLYCAN_BIOSYNTHESIS_HEPARAN_SULFATE		26	-0.175633	-0.542526	0.976654	0.968538	1	5825	tags=38%, list=30%, signal=55%
KEGG_APOPTOSIS	KEGG_APOPTOSIS		86	0.227098	0.853598	0.640927	0.694999	1	2090	tags=17%, list=11%, signal=19%					KEGG_ANTIGEN_PROCESSING_AND_PRESENTATION	KEGG_ANTIGEN_PROCESSING_AND_PRESENTATION		80	-0.177885	-0.540818	0.929389	0.95778	1	6758	tags=34%, list=35%, signal=51%
KEGG_CELL_CYCLE	KEGG_CELL_CYCLE		124	0.278759	0.851941	0.596422	0.689343	1	6288	tags=49%, list=32%, signal=72%
KEGG_NOTCH_SIGNALING_PATHWAY	KEGG_NOTCH_SIGNALING_PATHWAY		47	0.25427	0.830206	0.673704	0.713049	1	4437	tags=30%, list=23%, signal=38%
KEGG_CYTOSOLIC_DNA_SENSING_PATHWAY	KEGG_CYTOSOLIC_DNA_SENSING_PATHWAY		53	0.250965	0.827867	0.676659	0.7082	1	6422	tags=42%, list=33%, signal=62%
KEGG_VEGF_SIGNALING_PATHWAY	KEGG_VEGF_SIGNALING_PATHWAY		76	0.200254	0.803788	0.746241	0.734214	1	2852	tags=20%, list=15%, signal=23%
KEGG_SPLICEOSOME	KEGG_SPLICEOSOME		126	0.272038	0.759091	0.67451	0.789116	1	7480	tags=56%, list=38%, signal=91%
KEGG_NUCLEOTIDE_EXCISION_REPAIR	KEGG_NUCLEOTIDE_EXCISION_REPAIR		44	0.265594	0.752619	0.699805	0.788563	1	4252	tags=32%, list=22%, signal=41%
KEGG_ENDOMETRIAL_CANCER	KEGG_ENDOMETRIAL_CANCER		52	0.207489	0.744595	0.785448	0.790269	1	2957	tags=21%, list=15%, signal=25%
KEGG_BLADDER_CANCER	KEGG_BLADDER_CANCER		42	0.22796	0.727279	0.833333	0.804026	1	3775	tags=26%, list=19%, signal=32%
KEGG_UBIQUITIN_MEDIATED_PROTEOLYSIS	KEGG_UBIQUITIN_MEDIATED_PROTEOLYSIS		133	0.141137	0.499107	0.968627	0.9853	1	5309	tags=29%, list=27%, signal=40%
KEGG_OLFACTORY_TRANSDUCTION	KEGG_OLFACTORY_TRANSDUCTION		371	0.196251	0.401545	0.964143	0.994648	1	8344	tags=54%, list=43%, signal=93%

## Sheet: RFX5
HIGH																LOW
NAME	GS<br> follow link to MSigDB	GS DETAILS	SIZE	ES	NES	NOM p-val	FDR q-val	FWER p-val	RANK AT MAX	LEADING EDGE						NAME	GS<br> follow link to MSigDB	GS DETAILS	SIZE	ES	NES	NOM p-val	FDR q-val	FWER p-val	RANK AT MAX	LEADING EDGE
KEGG_PHOSPHATIDYLINOSITOL_SIGNALING_SYSTEM	KEGG_PHOSPHATIDYLINOSITOL_SIGNALING_SYSTEM	Details ...	76	0.543932	1.87305	0	0.445383	0.156	4476	tags=50%, list=23%, signal=65%						KEGG_METABOLISM_OF_XENOBIOTICS_BY_CYTOCHROME_P450	KEGG_METABOLISM_OF_XENOBIOTICS_BY_CYTOCHROME_P450	Details ...	68	-0.581387	-1.71395	0.0295858	0.683591	0.504	3436	tags=53%, list=18%, signal=64%
KEGG_T_CELL_RECEPTOR_SIGNALING_PATHWAY	KEGG_T_CELL_RECEPTOR_SIGNALING_PATHWAY	Details ...	108	0.557749	1.86761	0.0135922	0.236817	0.167	5691	tags=61%, list=29%, signal=86%						KEGG_RETINOL_METABOLISM	KEGG_RETINOL_METABOLISM	Details ...	64	-0.591836	-1.68759	0.0336634	0.412558	0.566	4487	tags=66%, list=23%, signal=85%
KEGG_UBIQUITIN_MEDIATED_PROTEOLYSIS	KEGG_UBIQUITIN_MEDIATED_PROTEOLYSIS	Details ...	133	0.518474	1.86573	0.00385356	0.159914	0.169	6373	tags=64%, list=33%, signal=94%						KEGG_OXIDATIVE_PHOSPHORYLATION	KEGG_OXIDATIVE_PHOSPHORYLATION	Details ...	116	-0.550951	-1.65252	0.0776699	0.360083	0.646	3232	tags=50%, list=17%, signal=60%
KEGG_APOPTOSIS	KEGG_APOPTOSIS	Details ...	86	0.489728	1.81952	0.00804829	0.191563	0.236	4212	tags=42%, list=22%, signal=53%						KEGG_DRUG_METABOLISM_CYTOCHROME_P450	KEGG_DRUG_METABOLISM_CYTOCHROME_P450	Details ...	70	-0.527615	-1.58203	0.0665362	0.447721	0.785	3436	tags=49%, list=18%, signal=59%
KEGG_ACUTE_MYELOID_LEUKEMIA	KEGG_ACUTE_MYELOID_LEUKEMIA	Details ...	57	0.515917	1.77165	0.0114723	0.246106	0.324	4634	tags=51%, list=24%, signal=67%						KEGG_STEROID_HORMONE_BIOSYNTHESIS	KEGG_STEROID_HORMONE_BIOSYNTHESIS	Details ...	55	-0.537516	-1.58088	0.0376238	0.361276	0.788	3260	tags=49%, list=17%, signal=59%
KEGG_INOSITOL_PHOSPHATE_METABOLISM	KEGG_INOSITOL_PHOSPHATE_METABOLISM	Details ...	54	0.514493	1.77075	0.00386847	0.207641	0.327	4476	tags=48%, list=23%, signal=62%						KEGG_PENTOSE_AND_GLUCURONATE_INTERCONVERSIONS	KEGG_PENTOSE_AND_GLUCURONATE_INTERCONVERSIONS	Details ...	28	-0.600778	-1.46324	0.101796	0.590003	0.932	3260	tags=50%, list=17%, signal=60%
KEGG_RENAL_CELL_CARCINOMA	KEGG_RENAL_CELL_CARCINOMA	Details ...	70	0.463754	1.70915	0.0154739	0.295715	0.468	2350	tags=31%, list=12%, signal=36%						KEGG_DRUG_METABOLISM_OTHER_ENZYMES	KEGG_DRUG_METABOLISM_OTHER_ENZYMES	Details ...	51	-0.463341	-1.4173	0.106589	0.624646	0.951	3904	tags=47%, list=20%, signal=59%
KEGG_PANCREATIC_CANCER	KEGG_PANCREATIC_CANCER	Details ...	70	0.456229	1.70434	0.003861	0.270069	0.48	5207	tags=49%, list=27%, signal=66%						KEGG_CARDIAC_MUSCLE_CONTRACTION	KEGG_CARDIAC_MUSCLE_CONTRACTION	Details ...	73	-0.407813	-1.38948	0.104384	0.615607	0.961	2687	tags=37%, list=14%, signal=43%
KEGG_NON_SMALL_CELL_LUNG_CANCER	KEGG_NON_SMALL_CELL_LUNG_CANCER	Details ...	54	0.488459	1.69992	0.0078125	0.250656	0.493	2702	tags=39%, list=14%, signal=45%						KEGG_STEROID_BIOSYNTHESIS	KEGG_STEROID_BIOSYNTHESIS	Details ...	17	-0.600116	-1.38914	0.162109	0.54799	0.961	2267	tags=53%, list=12%, signal=60%
KEGG_CHEMOKINE_SIGNALING_PATHWAY	KEGG_CHEMOKINE_SIGNALING_PATHWAY	Details ...	187	0.445138	1.69774	0.019685	0.228329	0.496	5865	tags=51%, list=30%, signal=73%						KEGG_ASCORBATE_AND_ALDARATE_METABOLISM	KEGG_ASCORBATE_AND_ALDARATE_METABOLISM	Details ...	25	-0.568167	-1.37021	0.163968	0.533856	0.967	3260	tags=56%, list=17%, signal=67%
KEGG_LYSINE_DEGRADATION	KEGG_LYSINE_DEGRADATION	Details ...	44	0.548019	1.69134	0.0219124	0.219747	0.512	5012	tags=52%, list=26%, signal=70%						KEGG_PARKINSONS_DISEASE	KEGG_PARKINSONS_DISEASE	Details ...	113	-0.435779	-1.33471	0.214429	0.560526	0.98	3300	tags=45%, list=17%, signal=54%
KEGG_FC_EPSILON_RI_SIGNALING_PATHWAY	KEGG_FC_EPSILON_RI_SIGNALING_PATHWAY	Details ...	79	0.454186	1.69045	0.0155642	0.203613	0.515	6836	tags=58%, list=35%, signal=89%						KEGG_ALZHEIMERS_DISEASE	KEGG_ALZHEIMERS_DISEASE	Details ...	157	-0.336461	-1.21625	0.269307	0.797685	0.998	2323	tags=30%, list=12%, signal=34%
KEGG_PROSTATE_CANCER	KEGG_PROSTATE_CANCER	Details ...	89	0.433629	1.68824	0.00381679	0.192033	0.521	6220	tags=52%, list=32%, signal=76%						KEGG_GLUTATHIONE_METABOLISM	KEGG_GLUTATHIONE_METABOLISM	Details ...	47	-0.344162	-1.16387	0.283784	0.875838	0.999	1228	tags=19%, list=6%, signal=20%
KEGG_CHRONIC_MYELOID_LEUKEMIA	KEGG_CHRONIC_MYELOID_LEUKEMIA	Details ...	73	0.491563	1.68525	0.044316	0.181878	0.526	2818	tags=37%, list=14%, signal=43%						KEGG_STARCH_AND_SUCROSE_METABOLISM	KEGG_STARCH_AND_SUCROSE_METABOLISM	Details ...	51	-0.37133	-1.1584	0.284047	0.826974	0.999	3318	tags=45%, list=17%, signal=54%
KEGG_TOLL_LIKE_RECEPTOR_SIGNALING_PATHWAY	KEGG_TOLL_LIKE_RECEPTOR_SIGNALING_PATHWAY	Details ...	101	0.438558	1.66568	0.0291262	0.197068	0.582	6852	tags=56%, list=35%, signal=87%						KEGG_HUNTINGTONS_DISEASE	KEGG_HUNTINGTONS_DISEASE	Details ...	171	-0.303366	-1.1061	0.36747	0.907358	0.999	2323	tags=32%, list=12%, signal=36%
KEGG_COLORECTAL_CANCER	KEGG_COLORECTAL_CANCER	Details ...	62	0.461722	1.65468	0.00759013	0.201315	0.605	6220	tags=56%, list=32%, signal=83%						KEGG_MATURITY_ONSET_DIABETES_OF_THE_YOUNG	KEGG_MATURITY_ONSET_DIABETES_OF_THE_YOUNG	Details ...	25	-0.419914	-1.07357	0.367816	0.937599	1	5512	tags=56%, list=28%, signal=78%
KEGG_MTOR_SIGNALING_PATHWAY	KEGG_MTOR_SIGNALING_PATHWAY	Details ...	51	0.472086	1.65367	0.0309478	0.191152	0.607	4977	tags=43%, list=26%, signal=58%						KEGG_PORPHYRIN_AND_CHLOROPHYLL_METABOLISM	KEGG_PORPHYRIN_AND_CHLOROPHYLL_METABOLISM	Details ...	40	-0.349046	-1.0067	0.456	1	1	3505	tags=40%, list=18%, signal=49%
KEGG_GLIOMA	KEGG_GLIOMA	Details ...	65	0.459434	1.65354	0.00761905	0.180834	0.607	4212	tags=40%, list=22%, signal=51%						KEGG_RIBOSOME	KEGG_RIBOSOME	Details ...	87	-0.434283	-0.958709	0.551308	1	1	4417	tags=49%, list=23%, signal=64%
KEGG_ERBB_SIGNALING_PATHWAY	KEGG_ERBB_SIGNALING_PATHWAY	Details ...	87	0.437459	1.62836	0.0229008	0.206125	0.666	6015	tags=51%, list=31%, signal=73%						KEGG_ARACHIDONIC_ACID_METABOLISM	KEGG_ARACHIDONIC_ACID_METABOLISM	Details ...	57	-0.277567	-0.957203	0.515326	1	1	3207	tags=35%, list=16%, signal=42%
KEGG_ENDOMETRIAL_CANCER	KEGG_ENDOMETRIAL_CANCER	Details ...	52	0.460627	1.62695	0.0276243	0.198218	0.669	6220	tags=60%, list=32%, signal=87%						KEGG_OLFACTORY_TRANSDUCTION	KEGG_OLFACTORY_TRANSDUCTION	Details ...	371	-0.49509	-0.95603	0.666667	1	1	4977	tags=63%, list=26%, signal=83%
KEGG_NEUROTROPHIN_SIGNALING_PATHWAY	KEGG_NEUROTROPHIN_SIGNALING_PATHWAY		125	0.427987	1.62556	0.0155039	0.190634	0.671	6028	tags=50%, list=31%, signal=71%						KEGG_COMPLEMENT_AND_COAGULATION_CASCADES	KEGG_COMPLEMENT_AND_COAGULATION_CASCADES		69	-0.285999	-0.910681	0.550308	1	1	3122	tags=38%, list=16%, signal=45%
KEGG_JAK_STAT_SIGNALING_PATHWAY	KEGG_JAK_STAT_SIGNALING_PATHWAY		155	0.422729	1.62197	0.0174081	0.187122	0.676	5714	tags=43%, list=29%, signal=61%						KEGG_GLYCOSPHINGOLIPID_BIOSYNTHESIS_LACTO_AND_NEOLACTO_SERIES	KEGG_GLYCOSPHINGOLIPID_BIOSYNTHESIS_LACTO_AND_NEOLACTO_SERIES		26	-0.279182	-0.899464	0.585271	1	1	4623	tags=46%, list=24%, signal=60%
KEGG_VEGF_SIGNALING_PATHWAY	KEGG_VEGF_SIGNALING_PATHWAY		76	0.404759	1.61363	0.00567108	0.188918	0.693	5940	tags=45%, list=30%, signal=64%						KEGG_GLYCOLYSIS_GLUCONEOGENESIS	KEGG_GLYCOLYSIS_GLUCONEOGENESIS		61	-0.258173	-0.894239	0.591797	1	1	3436	tags=36%, list=18%, signal=44%
KEGG_MAPK_SIGNALING_PATHWAY	KEGG_MAPK_SIGNALING_PATHWAY		267	0.397281	1.61024	0.00982318	0.185132	0.697	5940	tags=42%, list=30%, signal=59%						KEGG_PPAR_SIGNALING_PATHWAY	KEGG_PPAR_SIGNALING_PATHWAY		69	-0.250053	-0.88651	0.588235	0.992762	1	1671	tags=20%, list=9%, signal=22%
KEGG_VIRAL_MYOCARDITIS	KEGG_VIRAL_MYOCARDITIS		68	0.481797	1.60421	0.0521235	0.185412	0.709	5811	tags=56%, list=30%, signal=79%						KEGG_PROXIMAL_TUBULE_BICARBONATE_RECLAMATION	KEGG_PROXIMAL_TUBULE_BICARBONATE_RECLAMATION		23	-0.268568	-0.826365	0.741483	1	1	2419	tags=30%, list=12%, signal=35%
KEGG_INSULIN_SIGNALING_PATHWAY	KEGG_INSULIN_SIGNALING_PATHWAY		137	0.414441	1.60349	0.0287908	0.179145	0.709	6927	tags=55%, list=36%, signal=84%						KEGG_PENTOSE_PHOSPHATE_PATHWAY	KEGG_PENTOSE_PHOSPHATE_PATHWAY		27	-0.278368	-0.804345	0.717602	1	1	1924	tags=26%, list=10%, signal=29%
KEGG_SNARE_INTERACTIONS_IN_VESICULAR_TRANSPORT	KEGG_SNARE_INTERACTIONS_IN_VESICULAR_TRANSPORT		38	0.473251	1.59719	0.0386965	0.180708	0.721	6214	tags=53%, list=32%, signal=77%						KEGG_O_GLYCAN_BIOSYNTHESIS	KEGG_O_GLYCAN_BIOSYNTHESIS		30	-0.260252	-0.803782	0.698413	1	1	1501	tags=17%, list=8%, signal=18%
KEGG_RIG_I_LIKE_RECEPTOR_SIGNALING_PATHWAY	KEGG_RIG_I_LIKE_RECEPTOR_SIGNALING_PATHWAY		70	0.395235	1.59609	0.0261044	0.175225	0.722	7698	tags=56%, list=39%, signal=92%						KEGG_RENIN_ANGIOTENSIN_SYSTEM	KEGG_RENIN_ANGIOTENSIN_SYSTEM		17	-0.270959	-0.76124	0.784648	1	1	2201	tags=29%, list=11%, signal=33%
KEGG_B_CELL_RECEPTOR_SIGNALING_PATHWAY	KEGG_B_CELL_RECEPTOR_SIGNALING_PATHWAY		75	0.519608	1.59183	0.0621359	0.173971	0.735	6836	tags=69%, list=35%, signal=106%						KEGG_LINOLEIC_ACID_METABOLISM	KEGG_LINOLEIC_ACID_METABOLISM		29	-0.256521	-0.732661	0.782274	1	1	3050	tags=34%, list=16%, signal=41%
KEGG_SMALL_CELL_LUNG_CANCER	KEGG_SMALL_CELL_LUNG_CANCER		84	0.438515	1.58406	0.0497132	0.177016	0.754	7215	tags=61%, list=37%, signal=96%						KEGG_TYROSINE_METABOLISM	KEGG_TYROSINE_METABOLISM		42	-0.180929	-0.716043	0.937626	1	1	3436	tags=33%, list=18%, signal=40%
KEGG_RNA_DEGRADATION	KEGG_RNA_DEGRADATION		57	0.543915	1.57513	0.0752033	0.182268	0.772	3999	tags=46%, list=21%, signal=57%						KEGG_FRUCTOSE_AND_MANNOSE_METABOLISM	KEGG_FRUCTOSE_AND_MANNOSE_METABOLISM		34	-0.227543	-0.714593	0.797349	1	1	1433	tags=21%, list=7%, signal=22%
KEGG_GNRH_SIGNALING_PATHWAY	KEGG_GNRH_SIGNALING_PATHWAY		101	0.401235	1.57122	0.00984252	0.180258	0.78	6869	tags=51%, list=35%, signal=79%						KEGG_ARGININE_AND_PROLINE_METABOLISM	KEGG_ARGININE_AND_PROLINE_METABOLISM		54	-0.195109	-0.703846	0.868726	1	1	2624	tags=22%, list=13%, signal=26%
KEGG_WNT_SIGNALING_PATHWAY	KEGG_WNT_SIGNALING_PATHWAY		150	0.382423	1.56226	0.0260708	0.183115	0.792	5804	tags=43%, list=30%, signal=60%						KEGG_PRIMARY_BILE_ACID_BIOSYNTHESIS	KEGG_PRIMARY_BILE_ACID_BIOSYNTHESIS		16	-0.250706	-0.684746	0.856287	1	1	14620	tags=100%, list=75%, signal=399%
KEGG_NOD_LIKE_RECEPTOR_SIGNALING_PATHWAY	KEGG_NOD_LIKE_RECEPTOR_SIGNALING_PATHWAY		62	0.440292	1.55086	0.040404	0.190978	0.812	6539	tags=53%, list=34%, signal=80%						KEGG_NITROGEN_METABOLISM	KEGG_NITROGEN_METABOLISM		23	-0.225424	-0.683893	0.903101	1	1	2563	tags=26%, list=13%, signal=30%
KEGG_PROGESTERONE_MEDIATED_OOCYTE_MATURATION	KEGG_PROGESTERONE_MEDIATED_OOCYTE_MATURATION		85	0.41847	1.53411	0.0534351	0.207517	0.84	5804	tags=46%, list=30%, signal=65%						KEGG_PROTEIN_EXPORT	KEGG_PROTEIN_EXPORT		23	-0.252009	-0.676028	0.785714	1	1	5363	tags=57%, list=27%, signal=78%
KEGG_LEISHMANIA_INFECTION	KEGG_LEISHMANIA_INFECTION		68	0.505826	1.52968	0.108527	0.207066	0.845	7028	tags=63%, list=36%, signal=99%						KEGG_TERPENOID_BACKBONE_BIOSYNTHESIS	KEGG_TERPENOID_BACKBONE_BIOSYNTHESIS		15	-0.288517	-0.670683	0.773438	0.983313	1	3593	tags=40%, list=18%, signal=49%
KEGG_BASAL_TRANSCRIPTION_FACTORS	KEGG_BASAL_TRANSCRIPTION_FACTORS		35	0.500348	1.52718	0.0478088	0.204243	0.848	4869	tags=43%, list=25%, signal=57%						KEGG_GALACTOSE_METABOLISM	KEGG_GALACTOSE_METABOLISM		26	-0.19474	-0.612772	0.916501	1	1	3318	tags=35%, list=17%, signal=42%
KEGG_PATHWAYS_IN_CANCER	KEGG_PATHWAYS_IN_CANCER		325	0.345261	1.51958	0.0302457	0.208911	0.864	5965	tags=40%, list=31%, signal=56%						KEGG_BUTANOATE_METABOLISM	KEGG_BUTANOATE_METABOLISM		34	-0.18551	-0.584792	0.899029	1	1	3270	tags=26%, list=17%, signal=32%
KEGG_NATURAL_KILLER_CELL_MEDIATED_CYTOTOXICITY	KEGG_NATURAL_KILLER_CELL_MEDIATED_CYTOTOXICITY		131	0.400528	1.51679	0.0755814	0.20677	0.869	5206	tags=40%, list=27%, signal=54%						KEGG_BIOSYNTHESIS_OF_UNSATURATED_FATTY_ACIDS	KEGG_BIOSYNTHESIS_OF_UNSATURATED_FATTY_ACIDS		22	-0.195745	-0.576557	0.935685	1	1	3460	tags=27%, list=18%, signal=33%
KEGG_ADIPOCYTOKINE_SIGNALING_PATHWAY	KEGG_ADIPOCYTOKINE_SIGNALING_PATHWAY		67	0.41152	1.50426	0.0555556	0.21582	0.879	6319	tags=49%, list=32%, signal=73%						KEGG_PROTEASOME	KEGG_PROTEASOME		44	-0.213674	-0.548147	0.836893	0.995347	1	3772	tags=25%, list=19%, signal=31%
KEGG_VASCULAR_SMOOTH_MUSCLE_CONTRACTION	KEGG_VASCULAR_SMOOTH_MUSCLE_CONTRACTION		115	0.438977	1.49788	0.132296	0.218202	0.881	7170	tags=58%, list=37%, signal=92%						KEGG_GLYCOSAMINOGLYCAN_BIOSYNTHESIS_KERATAN_SULFATE	KEGG_GLYCOSAMINOGLYCAN_BIOSYNTHESIS_KERATAN_SULFATE		15	-0.192685	-0.53481	0.983193	0.978419	1	621	tags=13%, list=3%, signal=14%
KEGG_FC_GAMMA_R_MEDIATED_PHAGOCYTOSIS	KEGG_FC_GAMMA_R_MEDIATED_PHAGOCYTOSIS		95	0.408361	1.48003	0.0609037	0.23516	0.9	6820	tags=53%, list=35%, signal=81%						KEGG_AMINO_SUGAR_AND_NUCLEOTIDE_SUGAR_METABOLISM	KEGG_AMINO_SUGAR_AND_NUCLEOTIDE_SUGAR_METABOLISM		44	-0.157785	-0.514109	0.958984	0.96476	1	14918	tags=98%, list=76%, signal=415%
KEGG_DORSO_VENTRAL_AXIS_FORMATION	KEGG_DORSO_VENTRAL_AXIS_FORMATION		24	0.459939	1.45966	0.071028	0.256728	0.92	3265	tags=38%, list=17%, signal=45%
KEGG_NUCLEOTIDE_EXCISION_REPAIR	KEGG_NUCLEOTIDE_EXCISION_REPAIR		44	0.498985	1.45235	0.142	0.26002	0.927	3821	tags=39%, list=20%, signal=48%
KEGG_MELANOMA	KEGG_MELANOMA		71	0.370227	1.44018	0.0574713	0.269419	0.935	5703	tags=37%, list=29%, signal=52%
KEGG_ALLOGRAFT_REJECTION	KEGG_ALLOGRAFT_REJECTION		35	0.600605	1.43768	0.172147	0.26684	0.94	5811	tags=71%, list=30%, signal=102%
KEGG_REGULATION_OF_ACTIN_CYTOSKELETON	KEGG_REGULATION_OF_ACTIN_CYTOSKELETON		212	0.338346	1.43587	0.054717	0.263684	0.94	5691	tags=36%, list=29%, signal=50%
KEGG_ASTHMA	KEGG_ASTHMA		28	0.574122	1.43211	0.153543	0.262997	0.945	3204	tags=46%, list=16%, signal=55%
KEGG_INTESTINAL_IMMUNE_NETWORK_FOR_IGA_PRODUCTION	KEGG_INTESTINAL_IMMUNE_NETWORK_FOR_IGA_PRODUCTION		46	0.5532	1.42839	0.164461	0.262576	0.947	5639	tags=61%, list=29%, signal=85%
KEGG_LONG_TERM_POTENTIATION	KEGG_LONG_TERM_POTENTIATION		70	0.385886	1.37804	0.113095	0.324601	0.972	5940	tags=43%, list=30%, signal=61%
KEGG_ENDOCYTOSIS	KEGG_ENDOCYTOSIS		181	0.314357	1.37466	0.0867052	0.322945	0.974	8560	tags=52%, list=44%, signal=92%
KEGG_SPLICEOSOME	KEGG_SPLICEOSOME		126	0.482011	1.37336	0.219124	0.318925	0.974	4978	tags=45%, list=26%, signal=60%
KEGG_LEUKOCYTE_TRANSENDOTHELIAL_MIGRATION	KEGG_LEUKOCYTE_TRANSENDOTHELIAL_MIGRATION		115	0.342907	1.37052	0.0975143	0.316704	0.976	5940	tags=42%, list=30%, signal=60%
KEGG_OOCYTE_MEIOSIS	KEGG_OOCYTE_MEIOSIS		112	0.371021	1.36541	0.125	0.317629	0.977	6632	tags=45%, list=34%, signal=67%
KEGG_PURINE_METABOLISM	KEGG_PURINE_METABOLISM		157	0.310808	1.36393	0.0851485	0.313871	0.977	4858	tags=34%, list=25%, signal=45%
KEGG_CELL_ADHESION_MOLECULES_CAMS	KEGG_CELL_ADHESION_MOLECULES_CAMS		130	0.385469	1.36146	0.134078	0.311788	0.979	6905	tags=53%, list=35%, signal=82%
KEGG_PRIMARY_IMMUNODEFICIENCY	KEGG_PRIMARY_IMMUNODEFICIENCY		35	0.568938	1.36043	0.201149	0.307529	0.979	4828	tags=60%, list=25%, signal=80%
KEGG_HOMOLOGOUS_RECOMBINATION	KEGG_HOMOLOGOUS_RECOMBINATION		28	0.50613	1.35537	0.217659	0.30928	0.981	3758	tags=46%, list=19%, signal=57%
KEGG_EPITHELIAL_CELL_SIGNALING_IN_HELICOBACTER_PYLORI_INFECTION	KEGG_EPITHELIAL_CELL_SIGNALING_IN_HELICOBACTER_PYLORI_INFECTION		68	0.344811	1.34755	0.111969	0.314205	0.981	6805	tags=41%, list=35%, signal=63%
KEGG_NOTCH_SIGNALING_PATHWAY	KEGG_NOTCH_SIGNALING_PATHWAY		47	0.402421	1.34605	0.15102	0.310749	0.981	4904	tags=38%, list=25%, signal=51%
KEGG_TYPE_II_DIABETES_MELLITUS	KEGG_TYPE_II_DIABETES_MELLITUS		47	0.388887	1.33929	0.107843	0.314435	0.983	6527	tags=47%, list=33%, signal=70%
KEGG_GAP_JUNCTION	KEGG_GAP_JUNCTION		89	0.360843	1.33592	0.113095	0.314339	0.983	5691	tags=39%, list=29%, signal=55%
KEGG_HEMATOPOIETIC_CELL_LINEAGE	KEGG_HEMATOPOIETIC_CELL_LINEAGE		84	0.409599	1.33361	0.197822	0.312026	0.984	5976	tags=48%, list=31%, signal=68%
KEGG_ANTIGEN_PROCESSING_AND_PRESENTATION	KEGG_ANTIGEN_PROCESSING_AND_PRESENTATION		80	0.429062	1.32493	0.200811	0.318188	0.985	4975	tags=40%, list=26%, signal=53%
KEGG_TYPE_I_DIABETES_MELLITUS	KEGG_TYPE_I_DIABETES_MELLITUS		41	0.496715	1.31954	0.216	0.320339	0.988	5811	tags=54%, list=30%, signal=76%
KEGG_AUTOIMMUNE_THYROID_DISEASE	KEGG_AUTOIMMUNE_THYROID_DISEASE		50	0.481367	1.31502	0.226908	0.321078	0.988	4194	tags=44%, list=22%, signal=56%
KEGG_CYTOSOLIC_DNA_SENSING_PATHWAY	KEGG_CYTOSOLIC_DNA_SENSING_PATHWAY		53	0.361605	1.31261	0.156313	0.319131	0.988	6528	tags=45%, list=33%, signal=68%
KEGG_GRAFT_VERSUS_HOST_DISEASE	KEGG_GRAFT_VERSUS_HOST_DISEASE		37	0.536569	1.29622	0.261569	0.335266	0.992	5811	tags=59%, list=30%, signal=85%
KEGG_AXON_GUIDANCE	KEGG_AXON_GUIDANCE		129	0.318469	1.29469	0.145349	0.332268	0.992	6836	tags=40%, list=35%, signal=60%
KEGG_ADHERENS_JUNCTION	KEGG_ADHERENS_JUNCTION		73	0.335681	1.28051	0.162264	0.346505	0.992	5356	tags=42%, list=27%, signal=58%
KEGG_GLYCOSAMINOGLYCAN_BIOSYNTHESIS_HEPARAN_SULFATE	KEGG_GLYCOSAMINOGLYCAN_BIOSYNTHESIS_HEPARAN_SULFATE		26	0.411414	1.27431	0.193738	0.349982	0.992	7146	tags=46%, list=37%, signal=73%
KEGG_ONE_CARBON_POOL_BY_FOLATE	KEGG_ONE_CARBON_POOL_BY_FOLATE		17	0.506394	1.26671	0.253012	0.355083	0.994	7346	tags=59%, list=38%, signal=94%
KEGG_MISMATCH_REPAIR	KEGG_MISMATCH_REPAIR		23	0.514392	1.26641	0.293413	0.350575	0.994	1907	tags=30%, list=10%, signal=34%
KEGG_AMYOTROPHIC_LATERAL_SCLEROSIS_ALS	KEGG_AMYOTROPHIC_LATERAL_SCLEROSIS_ALS		52	0.326642	1.26234	0.138996	0.35097	0.994	6938	tags=42%, list=36%, signal=65%
KEGG_VASOPRESSIN_REGULATED_WATER_REABSORPTION	KEGG_VASOPRESSIN_REGULATED_WATER_REABSORPTION		44	0.356301	1.23679	0.209486	0.380948	0.996	6702	tags=50%, list=34%, signal=76%
KEGG_ABC_TRANSPORTERS	KEGG_ABC_TRANSPORTERS		44	0.371639	1.23385	0.218437	0.379761	0.996	6956	tags=39%, list=36%, signal=60%
KEGG_THYROID_CANCER	KEGG_THYROID_CANCER		29	0.381097	1.22755	0.213147	0.383405	0.997	6220	tags=52%, list=32%, signal=76%
KEGG_SYSTEMIC_LUPUS_ERYTHEMATOSUS	KEGG_SYSTEMIC_LUPUS_ERYTHEMATOSUS		55	0.416387	1.21802	0.274131	0.391876	0.997	8344	tags=67%, list=43%, signal=117%
KEGG_RIBOFLAVIN_METABOLISM	KEGG_RIBOFLAVIN_METABOLISM		16	0.387661	1.21276	0.219828	0.393657	0.999	378	tags=13%, list=2%, signal=13%
KEGG_MELANOGENESIS	KEGG_MELANOGENESIS		101	0.311032	1.20571	0.218504	0.398951	0.999	8208	tags=53%, list=42%, signal=92%
KEGG_CELL_CYCLE	KEGG_CELL_CYCLE		124	0.375613	1.19609	0.320236	0.406939	0.999	5999	tags=40%, list=31%, signal=58%
KEGG_AMINOACYL_TRNA_BIOSYNTHESIS	KEGG_AMINOACYL_TRNA_BIOSYNTHESIS		22	0.481161	1.16548	0.362525	0.445552	0.999	9211	tags=86%, list=47%, signal=163%
KEGG_LONG_TERM_DEPRESSION	KEGG_LONG_TERM_DEPRESSION		70	0.306393	1.16242	0.270059	0.444498	0.999	7036	tags=44%, list=36%, signal=69%
KEGG_CYSTEINE_AND_METHIONINE_METABOLISM	KEGG_CYSTEINE_AND_METHIONINE_METABOLISM		34	0.357542	1.15728	0.256673	0.44654	0.999	1817	tags=18%, list=9%, signal=19%
KEGG_FOCAL_ADHESION	KEGG_FOCAL_ADHESION		199	0.30998	1.15451	0.339483	0.445333	0.999	6651	tags=43%, list=34%, signal=65%
KEGG_GLYCOSPHINGOLIPID_BIOSYNTHESIS_GANGLIO_SERIES	KEGG_GLYCOSPHINGOLIPID_BIOSYNTHESIS_GANGLIO_SERIES		15	0.428031	1.12918	0.34127	0.474803	0.999	3896	tags=27%, list=20%, signal=33%
KEGG_TGF_BETA_SIGNALING_PATHWAY	KEGG_TGF_BETA_SIGNALING_PATHWAY		85	0.286701	1.12051	0.316794	0.482104	0.999	5154	tags=31%, list=26%, signal=41%
KEGG_CALCIUM_SIGNALING_PATHWAY	KEGG_CALCIUM_SIGNALING_PATHWAY		177	0.308374	1.11734	0.339882	0.481031	0.999	8122	tags=49%, list=42%, signal=83%
KEGG_GLYCEROPHOSPHOLIPID_METABOLISM	KEGG_GLYCEROPHOSPHOLIPID_METABOLISM		77	0.291822	1.11311	0.315151	0.481563	1	6776	tags=36%, list=35%, signal=56%
KEGG_BASAL_CELL_CARCINOMA	KEGG_BASAL_CELL_CARCINOMA		55	0.291204	1.09693	0.325843	0.499697	1	8530	tags=58%, list=44%, signal=103%
KEGG_ETHER_LIPID_METABOLISM	KEGG_ETHER_LIPID_METABOLISM		33	0.327754	1.08193	0.354709	0.516567	1	6770	tags=45%, list=35%, signal=70%
KEGG_HEDGEHOG_SIGNALING_PATHWAY	KEGG_HEDGEHOG_SIGNALING_PATHWAY		56	0.282157	1.06124	0.377432	0.542977	1	6515	tags=41%, list=33%, signal=61%
KEGG_RNA_POLYMERASE	KEGG_RNA_POLYMERASE		29	0.361773	1.05547	0.417339	0.546351	1	3336	tags=34%, list=17%, signal=42%
KEGG_SELENOAMINO_ACID_METABOLISM	KEGG_SELENOAMINO_ACID_METABOLISM		25	0.343792	1.0445	0.395538	0.55789	1	6829	tags=40%, list=35%, signal=61%
KEGG_P53_SIGNALING_PATHWAY	KEGG_P53_SIGNALING_PATHWAY		68	0.302054	1.04089	0.42915	0.557201	1	3541	tags=24%, list=18%, signal=29%
KEGG_GLYCOSAMINOGLYCAN_BIOSYNTHESIS_CHONDROITIN_SULFATE	KEGG_GLYCOSAMINOGLYCAN_BIOSYNTHESIS_CHONDROITIN_SULFATE		22	0.375639	1.03771	0.432331	0.556359	1	8249	tags=55%, list=42%, signal=94%
KEGG_ALDOSTERONE_REGULATED_SODIUM_REABSORPTION	KEGG_ALDOSTERONE_REGULATED_SODIUM_REABSORPTION		42	0.28517	1.03536	0.417695	0.55391	1	4853	tags=29%, list=25%, signal=38%
KEGG_CYTOKINE_CYTOKINE_RECEPTOR_INTERACTION	KEGG_CYTOKINE_CYTOKINE_RECEPTOR_INTERACTION		262	0.263116	1.01863	0.439394	0.573724	1	8143	tags=45%, list=42%, signal=76%
KEGG_DNA_REPLICATION	KEGG_DNA_REPLICATION		36	0.42163	1.00179	0.481038	0.592635	1	8452	tags=64%, list=43%, signal=113%
KEGG_TIGHT_JUNCTION	KEGG_TIGHT_JUNCTION		131	0.227591	0.974491	0.49904	0.629922	1	5940	tags=32%, list=30%, signal=46%
KEGG_DILATED_CARDIOMYOPATHY	KEGG_DILATED_CARDIOMYOPATHY		90	0.284968	0.954291	0.467583	0.655899	1	5922	tags=38%, list=30%, signal=54%
KEGG_SPHINGOLIPID_METABOLISM	KEGG_SPHINGOLIPID_METABOLISM		39	0.279281	0.941397	0.530146	0.670475	1	6691	tags=38%, list=34%, signal=58%
KEGG_PYRIMIDINE_METABOLISM	KEGG_PYRIMIDINE_METABOLISM		98	0.271884	0.937684	0.523517	0.669841	1	4402	tags=28%, list=23%, signal=35%
KEGG_BASE_EXCISION_REPAIR	KEGG_BASE_EXCISION_REPAIR		33	0.347872	0.908281	0.557851	0.710478	1	8416	tags=52%, list=43%, signal=90%
KEGG_PRION_DISEASES	KEGG_PRION_DISEASES		35	0.277357	0.880367	0.599598	0.74772	1	8376	tags=57%, list=43%, signal=100%
KEGG_OTHER_GLYCAN_DEGRADATION	KEGG_OTHER_GLYCAN_DEGRADATION		16	0.332916	0.879711	0.567194	0.741667	1	2569	tags=19%, list=13%, signal=22%
KEGG_VALINE_LEUCINE_AND_ISOLEUCINE_DEGRADATION	KEGG_VALINE_LEUCINE_AND_ISOLEUCINE_DEGRADATION		44	0.298501	0.87469	0.569672	0.742898	1	7955	tags=48%, list=41%, signal=80%
KEGG_TASTE_TRANSDUCTION	KEGG_TASTE_TRANSDUCTION		51	0.299716	0.873042	0.566802	0.738573	1	10124	tags=69%, list=52%, signal=142%
KEGG_HYPERTROPHIC_CARDIOMYOPATHY_HCM	KEGG_HYPERTROPHIC_CARDIOMYOPATHY_HCM		83	0.256471	0.855788	0.564103	0.759936	1	6995	tags=41%, list=36%, signal=64%
KEGG_REGULATION_OF_AUTOPHAGY	KEGG_REGULATION_OF_AUTOPHAGY		34	0.25887	0.838488	0.701826	0.780069	1	2130	tags=15%, list=11%, signal=16%
KEGG_LYSOSOME	KEGG_LYSOSOME		121	0.259355	0.836859	0.6	0.775691	1	6419	tags=33%, list=33%, signal=49%
KEGG_BETA_ALANINE_METABOLISM	KEGG_BETA_ALANINE_METABOLISM		22	0.278198	0.833471	0.664596	0.775105	1	10213	tags=64%, list=52%, signal=133%
KEGG_PANTOTHENATE_AND_COA_BIOSYNTHESIS	KEGG_PANTOTHENATE_AND_COA_BIOSYNTHESIS		16	0.285346	0.831394	0.687755	0.771604	1	1777	tags=13%, list=9%, signal=14%
KEGG_ALPHA_LINOLENIC_ACID_METABOLISM	KEGG_ALPHA_LINOLENIC_ACID_METABOLISM		19	0.281276	0.830557	0.67562	0.76632	1	6770	tags=37%, list=35%, signal=56%
KEGG_VIBRIO_CHOLERAE_INFECTION	KEGG_VIBRIO_CHOLERAE_INFECTION		54	0.222898	0.825081	0.683027	0.767704	1	6617	tags=31%, list=34%, signal=48%
KEGG_ARRHYTHMOGENIC_RIGHT_VENTRICULAR_CARDIOMYOPATHY_ARVC	KEGG_ARRHYTHMOGENIC_RIGHT_VENTRICULAR_CARDIOMYOPATHY_ARVC		74	0.245148	0.81985	0.585271	0.769323	1	6995	tags=42%, list=36%, signal=65%
KEGG_PROPANOATE_METABOLISM	KEGG_PROPANOATE_METABOLISM		32	0.280604	0.810454	0.623457	0.77642	1	9408	tags=56%, list=48%, signal=108%
KEGG_TRYPTOPHAN_METABOLISM	KEGG_TRYPTOPHAN_METABOLISM		39	0.213441	0.807493	0.794	0.774277	1	9968	tags=56%, list=51%, signal=115%
KEGG_BLADDER_CANCER	KEGG_BLADDER_CANCER		42	0.233004	0.793539	0.742424	0.789193	1	8079	tags=45%, list=41%, signal=77%
KEGG_CITRATE_CYCLE_TCA_CYCLE	KEGG_CITRATE_CYCLE_TCA_CYCLE		30	0.280605	0.748395	0.716	0.848885	1	9385	tags=57%, list=48%, signal=109%
KEGG_GLYCOSYLPHOSPHATIDYLINOSITOL_GPI_ANCHOR_BIOSYNTHESIS	KEGG_GLYCOSYLPHOSPHATIDYLINOSITOL_GPI_ANCHOR_BIOSYNTHESIS		24	0.249527	0.734158	0.738776	0.862136	1	10207	tags=54%, list=52%, signal=113%
KEGG_GLYCOSAMINOGLYCAN_DEGRADATION	KEGG_GLYCOSAMINOGLYCAN_DEGRADATION		21	0.240934	0.708752	0.776062	0.889673	1	2284	tags=14%, list=12%, signal=16%
KEGG_NICOTINATE_AND_NICOTINAMIDE_METABOLISM	KEGG_NICOTINATE_AND_NICOTINAMIDE_METABOLISM		24	0.204095	0.694252	0.892276	0.901543	1	9247	tags=58%, list=47%, signal=111%
KEGG_PATHOGENIC_ESCHERICHIA_COLI_INFECTION	KEGG_PATHOGENIC_ESCHERICHIA_COLI_INFECTION		55	0.183402	0.68988	0.900585	0.89996	1	6852	tags=33%, list=35%, signal=50%
KEGG_PEROXISOME	KEGG_PEROXISOME		78	0.204383	0.680301	0.808732	0.904417	1	7970	tags=35%, list=41%, signal=58%
KEGG_PYRUVATE_METABOLISM	KEGG_PYRUVATE_METABOLISM		40	0.195662	0.656296	0.898406	0.926512	1	9968	tags=55%, list=51%, signal=112%
KEGG_GLYOXYLATE_AND_DICARBOXYLATE_METABOLISM	KEGG_GLYOXYLATE_AND_DICARBOXYLATE_METABOLISM		16	0.24796	0.62826	0.869835	0.949646	1	9123	tags=63%, list=47%, signal=117%
KEGG_N_GLYCAN_BIOSYNTHESIS	KEGG_N_GLYCAN_BIOSYNTHESIS		46	0.203534	0.61169	0.858025	0.95839	1	9456	tags=54%, list=48%, signal=105%
KEGG_ECM_RECEPTOR_INTERACTION	KEGG_ECM_RECEPTOR_INTERACTION		83	0.184865	0.600175	0.863296	0.961237	1	7616	tags=42%, list=39%, signal=69%
KEGG_GLYCEROLIPID_METABOLISM	KEGG_GLYCEROLIPID_METABOLISM		48	0.156779	0.563054	0.981211	0.982409	1	6226	tags=23%, list=32%, signal=34%
KEGG_PHENYLALANINE_METABOLISM	KEGG_PHENYLALANINE_METABOLISM		18	0.160571	0.546226	0.991919	0.986087	1	8927	tags=50%, list=46%, signal=92%
KEGG_ALANINE_ASPARTATE_AND_GLUTAMATE_METABOLISM	KEGG_ALANINE_ASPARTATE_AND_GLUTAMATE_METABOLISM		30	0.170433	0.528489	0.975904	0.987943	1	7436	tags=30%, list=38%, signal=48%
KEGG_HISTIDINE_METABOLISM	KEGG_HISTIDINE_METABOLISM		29	0.147022	0.505325	1	0.990955	1	9508	tags=45%, list=49%, signal=87%
KEGG_FATTY_ACID_METABOLISM	KEGG_FATTY_ACID_METABOLISM		42	0.132507	0.424925	0.995781	1	1	4258	tags=17%, list=22%, signal=21%
KEGG_NEUROACTIVE_LIGAND_RECEPTOR_INTERACTION	KEGG_NEUROACTIVE_LIGAND_RECEPTOR_INTERACTION		271	0.108812	0.361838	1	1	1	7739	tags=29%, list=40%, signal=48%
KEGG_GLYCINE_SERINE_AND_THREONINE_METABOLISM	KEGG_GLYCINE_SERINE_AND_THREONINE_METABOLISM		31	0.0966975	0.302594	1	0.999394	1	7346	tags=26%, list=38%, signal=41%

## Sheet: SELP
HIGH																LOW
NAME	GS<br> follow link to MSigDB	GS DETAILS	SIZE	ES	NES	NOM p-val	FDR q-val	FWER p-val	RANK AT MAX	LEADING EDGE						NAME	GS<br> follow link to MSigDB	GS DETAILS	SIZE	ES	NES	NOM p-val	FDR q-val	FWER p-val	RANK AT MAX	LEADING EDGE
KEGG_PRIMARY_BILE_ACID_BIOSYNTHESIS	KEGG_PRIMARY_BILE_ACID_BIOSYNTHESIS	Details ...	16	0.69055	1.96821	0	0.147112	0.066	2031	tags=44%, list=10%, signal=49%						KEGG_PROTEASOME	KEGG_PROTEASOME	Details ...	44	-0.827056	-1.95475	0	0.100662	0.075	2319	tags=82%, list=12%, signal=93%
KEGG_CALCIUM_SIGNALING_PATHWAY	KEGG_CALCIUM_SIGNALING_PATHWAY	Details ...	177	0.548376	1.93484	0	0.105955	0.094	4081	tags=47%, list=21%, signal=59%						KEGG_DNA_REPLICATION	KEGG_DNA_REPLICATION	Details ...	36	-0.812917	-1.869	0.00204918	0.127075	0.165	1486	tags=67%, list=8%, signal=72%
KEGG_VASCULAR_SMOOTH_MUSCLE_CONTRACTION	KEGG_VASCULAR_SMOOTH_MUSCLE_CONTRACTION	Details ...	115	0.570976	1.91381	0	0.0873098	0.113	4026	tags=47%, list=21%, signal=59%						KEGG_PYRIMIDINE_METABOLISM	KEGG_PYRIMIDINE_METABOLISM	Details ...	98	-0.562389	-1.81945	0.00203252	0.138768	0.253	3470	tags=53%, list=18%, signal=64%
KEGG_MELANOGENESIS	KEGG_MELANOGENESIS	Details ...	101	0.50568	1.90377	0	0.0704066	0.118	4026	tags=38%, list=21%, signal=47%						KEGG_PENTOSE_PHOSPHATE_PATHWAY	KEGG_PENTOSE_PHOSPHATE_PATHWAY	Details ...	27	-0.62264	-1.78801	0.00617284	0.138926	0.315	3387	tags=56%, list=17%, signal=67%
KEGG_HEDGEHOG_SIGNALING_PATHWAY	KEGG_HEDGEHOG_SIGNALING_PATHWAY	Details ...	56	0.551786	1.86235	0	0.0867011	0.17	4601	tags=39%, list=24%, signal=51%						KEGG_GLYOXYLATE_AND_DICARBOXYLATE_METABOLISM	KEGG_GLYOXYLATE_AND_DICARBOXYLATE_METABOLISM	Details ...	16	-0.703461	-1.78727	0.0159363	0.111784	0.316	2150	tags=50%, list=11%, signal=56%
KEGG_BASAL_CELL_CARCINOMA	KEGG_BASAL_CELL_CARCINOMA	Details ...	55	0.541352	1.8566	0	0.07912	0.182	3482	tags=35%, list=18%, signal=42%						KEGG_CELL_CYCLE	KEGG_CELL_CYCLE	Details ...	124	-0.568284	-1.75446	0.0203666	0.122995	0.39	2280	tags=43%, list=12%, signal=48%
KEGG_ECM_RECEPTOR_INTERACTION	KEGG_ECM_RECEPTOR_INTERACTION	Details ...	83	0.588981	1.81733	0.00632911	0.0985884	0.244	3720	tags=53%, list=19%, signal=65%						KEGG_BASE_EXCISION_REPAIR	KEGG_BASE_EXCISION_REPAIR	Details ...	33	-0.674911	-1.70777	0.0104167	0.155456	0.505	4067	tags=73%, list=21%, signal=92%
KEGG_DILATED_CARDIOMYOPATHY	KEGG_DILATED_CARDIOMYOPATHY	Details ...	90	0.558982	1.81629	0.00403226	0.0868491	0.244	2816	tags=40%, list=14%, signal=47%						KEGG_SPLICEOSOME	KEGG_SPLICEOSOME	Details ...	126	-0.601651	-1.68198	0.0323887	0.16862	0.574	3749	tags=56%, list=19%, signal=69%
KEGG_ARRHYTHMOGENIC_RIGHT_VENTRICULAR_CARDIOMYOPATHY_ARVC	KEGG_ARRHYTHMOGENIC_RIGHT_VENTRICULAR_CARDIOMYOPATHY_ARVC	Details ...	74	0.534637	1.80212	0.00790514	0.0864581	0.268	2816	tags=39%, list=14%, signal=46%						KEGG_HUNTINGTONS_DISEASE	KEGG_HUNTINGTONS_DISEASE	Details ...	171	-0.447428	-1.63894	0.0492126	0.20525	0.674	3283	tags=46%, list=17%, signal=55%
KEGG_AXON_GUIDANCE	KEGG_AXON_GUIDANCE	Details ...	129	0.462565	1.79954	0	0.0800478	0.275	3394	tags=33%, list=17%, signal=40%						KEGG_MISMATCH_REPAIR	KEGG_MISMATCH_REPAIR	Details ...	23	-0.683396	-1.63255	0.039501	0.192063	0.683	1486	tags=48%, list=8%, signal=52%
KEGG_FOCAL_ADHESION	KEGG_FOCAL_ADHESION	Details ...	199	0.480594	1.74832	0.00826446	0.118687	0.396	4341	tags=43%, list=22%, signal=55%						KEGG_NUCLEOTIDE_EXCISION_REPAIR	KEGG_NUCLEOTIDE_EXCISION_REPAIR	Details ...	44	-0.565808	-1.63071	0.0501002	0.176584	0.684	1734	tags=39%, list=9%, signal=42%
KEGG_GAP_JUNCTION	KEGG_GAP_JUNCTION	Details ...	89	0.463687	1.7353	0.00397614	0.121533	0.429	4026	tags=40%, list=21%, signal=51%						KEGG_STEROID_BIOSYNTHESIS	KEGG_STEROID_BIOSYNTHESIS	Details ...	17	-0.747923	-1.6163	0.0437262	0.178444	0.716	2285	tags=65%, list=12%, signal=73%
KEGG_COMPLEMENT_AND_COAGULATION_CASCADES	KEGG_COMPLEMENT_AND_COAGULATION_CASCADES	Details ...	69	0.496963	1.71608	0.00560748	0.132522	0.473	4925	tags=42%, list=25%, signal=56%						KEGG_HOMOLOGOUS_RECOMBINATION	KEGG_HOMOLOGOUS_RECOMBINATION	Details ...	28	-0.616852	-1.58211	0.0614407	0.20541	0.78	3349	tags=54%, list=17%, signal=65%
KEGG_HYPERTROPHIC_CARDIOMYOPATHY_HCM	KEGG_HYPERTROPHIC_CARDIOMYOPATHY_HCM	Details ...	83	0.523756	1.71538	0.0142276	0.123533	0.474	3256	tags=40%, list=17%, signal=48%						KEGG_OXIDATIVE_PHOSPHORYLATION	KEGG_OXIDATIVE_PHOSPHORYLATION	Details ...	116	-0.568063	-1.56267	0.106776	0.213572	0.806	3330	tags=55%, list=17%, signal=66%
KEGG_NEUROACTIVE_LIGAND_RECEPTOR_INTERACTION	KEGG_NEUROACTIVE_LIGAND_RECEPTOR_INTERACTION	Details ...	271	0.519306	1.70762	0.00194553	0.124016	0.492	6362	tags=57%, list=33%, signal=84%						KEGG_AMINOACYL_TRNA_BIOSYNTHESIS	KEGG_AMINOACYL_TRNA_BIOSYNTHESIS	Details ...	22	-0.668251	-1.54345	0.0785124	0.223109	0.838	3188	tags=59%, list=16%, signal=71%
KEGG_GLYCOSPHINGOLIPID_BIOSYNTHESIS_GANGLIO_SERIES	KEGG_GLYCOSPHINGOLIPID_BIOSYNTHESIS_GANGLIO_SERIES	Details ...	15	0.632989	1.70134	0.0199203	0.121215	0.502	4888	tags=47%, list=25%, signal=62%						KEGG_ONE_CARBON_POOL_BY_FOLATE	KEGG_ONE_CARBON_POOL_BY_FOLATE	Details ...	17	-0.61419	-1.49161	0.0979592	0.27981	0.899	3374	tags=65%, list=17%, signal=78%
KEGG_CELL_ADHESION_MOLECULES_CAMS	KEGG_CELL_ADHESION_MOLECULES_CAMS	Details ...	130	0.487254	1.67115	0.0281955	0.144408	0.564	4388	tags=36%, list=22%, signal=46%						KEGG_RNA_DEGRADATION	KEGG_RNA_DEGRADATION	Details ...	57	-0.516393	-1.49095	0.13	0.264301	0.899	2216	tags=35%, list=11%, signal=39%
KEGG_MAPK_SIGNALING_PATHWAY	KEGG_MAPK_SIGNALING_PATHWAY	Details ...	267	0.406649	1.66379	0.00796813	0.14582	0.58	5962	tags=41%, list=31%, signal=59%						KEGG_RNA_POLYMERASE	KEGG_RNA_POLYMERASE	Details ...	29	-0.519587	-1.47778	0.110204	0.267536	0.907	3838	tags=55%, list=20%, signal=69%
KEGG_PHOSPHATIDYLINOSITOL_SIGNALING_SYSTEM	KEGG_PHOSPHATIDYLINOSITOL_SIGNALING_SYSTEM	Details ...	76	0.477697	1.6521	0.0158416	0.150933	0.61	5423	tags=54%, list=28%, signal=74%						KEGG_ALZHEIMERS_DISEASE	KEGG_ALZHEIMERS_DISEASE	Details ...	157	-0.409864	-1.46437	0.114	0.272913	0.922	3733	tags=48%, list=19%, signal=59%
KEGG_TGF_BETA_SIGNALING_PATHWAY	KEGG_TGF_BETA_SIGNALING_PATHWAY	Details ...	85	0.460942	1.64738	0.0169133	0.148348	0.621	4601	tags=42%, list=24%, signal=55%						KEGG_RIBOSOME	KEGG_RIBOSOME	Details ...	87	-0.671584	-1.4542	0.179487	0.272963	0.93	5261	tags=80%, list=27%, signal=110%
KEGG_LONG_TERM_POTENTIATION	KEGG_LONG_TERM_POTENTIATION		70	0.438178	1.61509	0.006	0.175294	0.695	4130	tags=39%, list=21%, signal=49%						KEGG_PARKINSONS_DISEASE	KEGG_PARKINSONS_DISEASE		113	-0.49224	-1.45094	0.154004	0.26391	0.933	3283	tags=56%, list=17%, signal=67%
KEGG_WNT_SIGNALING_PATHWAY	KEGG_WNT_SIGNALING_PATHWAY		150	0.40447	1.61418	0.0140562	0.168498	0.7	5711	tags=40%, list=29%, signal=56%						KEGG_PROTEIN_EXPORT	KEGG_PROTEIN_EXPORT		23	-0.596606	-1.44756	0.136905	0.256613	0.936	4011	tags=65%, list=21%, signal=82%
KEGG_GLYCOSAMINOGLYCAN_BIOSYNTHESIS_CHONDROITIN_SULFATE	KEGG_GLYCOSAMINOGLYCAN_BIOSYNTHESIS_CHONDROITIN_SULFATE		22	0.601178	1.60972	0.0315126	0.165239	0.705	2972	tags=45%, list=15%, signal=54%						KEGG_GLYCOSYLPHOSPHATIDYLINOSITOL_GPI_ANCHOR_BIOSYNTHESIS	KEGG_GLYCOSYLPHOSPHATIDYLINOSITOL_GPI_ANCHOR_BIOSYNTHESIS		24	-0.522852	-1.44385	0.116279	0.250038	0.938	2968	tags=46%, list=15%, signal=54%
KEGG_VASOPRESSIN_REGULATED_WATER_REABSORPTION	KEGG_VASOPRESSIN_REGULATED_WATER_REABSORPTION		44	0.465531	1.59516	0.0284553	0.176122	0.736	6843	tags=48%, list=35%, signal=73%						KEGG_P53_SIGNALING_PATHWAY	KEGG_P53_SIGNALING_PATHWAY		68	-0.433048	-1.43179	0.114688	0.254175	0.943	3706	tags=50%, list=19%, signal=62%
KEGG_GNRH_SIGNALING_PATHWAY	KEGG_GNRH_SIGNALING_PATHWAY		101	0.407552	1.59155	0.00613497	0.172833	0.739	4228	tags=32%, list=22%, signal=40%						KEGG_FRUCTOSE_AND_MANNOSE_METABOLISM	KEGG_FRUCTOSE_AND_MANNOSE_METABOLISM		34	-0.477328	-1.41675	0.111765	0.261707	0.956	4391	tags=47%, list=23%, signal=61%
KEGG_LONG_TERM_DEPRESSION	KEGG_LONG_TERM_DEPRESSION		70	0.433521	1.58582	0.0100806	0.172535	0.752	6965	tags=56%, list=36%, signal=86%						KEGG_PATHOGENIC_ESCHERICHIA_COLI_INFECTION	KEGG_PATHOGENIC_ESCHERICHIA_COLI_INFECTION		55	-0.357123	-1.40303	0.0808081	0.268813	0.962	1539	tags=27%, list=8%, signal=30%
KEGG_REGULATION_OF_ACTIN_CYTOSKELETON	KEGG_REGULATION_OF_ACTIN_CYTOSKELETON		212	0.38279	1.57869	0.0223124	0.174446	0.768	4748	tags=37%, list=24%, signal=48%						KEGG_CITRATE_CYCLE_TCA_CYCLE	KEGG_CITRATE_CYCLE_TCA_CYCLE		30	-0.524078	-1.38122	0.172962	0.285627	0.971	5607	tags=63%, list=29%, signal=89%
KEGG_HEMATOPOIETIC_CELL_LINEAGE	KEGG_HEMATOPOIETIC_CELL_LINEAGE		84	0.506809	1.56511	0.0949721	0.18147	0.792	5949	tags=55%, list=30%, signal=78%						KEGG_TERPENOID_BACKBONE_BIOSYNTHESIS	KEGG_TERPENOID_BACKBONE_BIOSYNTHESIS		15	-0.599446	-1.3646	0.172816	0.295415	0.979	1943	tags=47%, list=10%, signal=52%
KEGG_LEUKOCYTE_TRANSENDOTHELIAL_MIGRATION	KEGG_LEUKOCYTE_TRANSENDOTHELIAL_MIGRATION		115	0.39706	1.53517	0.0419162	0.211248	0.866	5962	tags=44%, list=31%, signal=63%						KEGG_GLUTATHIONE_METABOLISM	KEGG_GLUTATHIONE_METABOLISM		47	-0.414381	-1.35253	0.136555	0.301061	0.984	3078	tags=47%, list=16%, signal=55%
KEGG_CHEMOKINE_SIGNALING_PATHWAY	KEGG_CHEMOKINE_SIGNALING_PATHWAY		187	0.405675	1.52764	0.0871212	0.213223	0.871	5008	tags=39%, list=26%, signal=51%						KEGG_CYSTEINE_AND_METHIONINE_METABOLISM	KEGG_CYSTEINE_AND_METHIONINE_METABOLISM		34	-0.41941	-1.32836	0.12685	0.322153	0.986	3918	tags=47%, list=20%, signal=59%
KEGG_NEUROTROPHIN_SIGNALING_PATHWAY	KEGG_NEUROTROPHIN_SIGNALING_PATHWAY		125	0.379101	1.52452	0.0282828	0.210581	0.878	4341	tags=32%, list=22%, signal=41%						KEGG_DRUG_METABOLISM_OTHER_ENZYMES	KEGG_DRUG_METABOLISM_OTHER_ENZYMES		51	-0.391478	-1.25788	0.173307	0.410215	0.997	4652	tags=37%, list=24%, signal=49%
KEGG_PATHWAYS_IN_CANCER	KEGG_PATHWAYS_IN_CANCER		325	0.353647	1.50023	0.0362903	0.232308	0.914	4345	tags=31%, list=22%, signal=40%						KEGG_GLYCOLYSIS_GLUCONEOGENESIS	KEGG_GLYCOLYSIS_GLUCONEOGENESIS		61	-0.350241	-1.24156	0.182524	0.421361	0.997	3444	tags=31%, list=18%, signal=38%
KEGG_ADHERENS_JUNCTION	KEGG_ADHERENS_JUNCTION		73	0.392169	1.493	0.0439331	0.23332	0.916	4586	tags=38%, list=24%, signal=50%						KEGG_N_GLYCAN_BIOSYNTHESIS	KEGG_N_GLYCAN_BIOSYNTHESIS		46	-0.41011	-1.20681	0.292247	0.462364	0.997	3829	tags=48%, list=20%, signal=59%
KEGG_MELANOMA	KEGG_MELANOMA		71	0.394242	1.48777	0.0383065	0.232435	0.921	2288	tags=23%, list=12%, signal=25%						KEGG_ALANINE_ASPARTATE_AND_GLUTAMATE_METABOLISM	KEGG_ALANINE_ASPARTATE_AND_GLUTAMATE_METABOLISM		30	-0.383623	-1.1966	0.240234	0.464903	0.998	3832	tags=43%, list=20%, signal=54%
KEGG_ABC_TRANSPORTERS	KEGG_ABC_TRANSPORTERS		44	0.455442	1.4824	0.0651731	0.232339	0.924	3636	tags=30%, list=19%, signal=36%						KEGG_PORPHYRIN_AND_CHLOROPHYLL_METABOLISM	KEGG_PORPHYRIN_AND_CHLOROPHYLL_METABOLISM		40	-0.394489	-1.19636	0.223382	0.45199	0.998	4496	tags=40%, list=23%, signal=52%
KEGG_INOSITOL_PHOSPHATE_METABOLISM	KEGG_INOSITOL_PHOSPHATE_METABOLISM		54	0.426986	1.47436	0.0715706	0.235488	0.931	5289	tags=50%, list=27%, signal=68%						KEGG_VIBRIO_CHOLERAE_INFECTION	KEGG_VIBRIO_CHOLERAE_INFECTION		54	-0.289099	-1.16038	0.205645	0.495099	1	2273	tags=28%, list=12%, signal=31%
KEGG_DORSO_VENTRAL_AXIS_FORMATION	KEGG_DORSO_VENTRAL_AXIS_FORMATION		24	0.463784	1.45076	0.0750507	0.259035	0.944	3948	tags=38%, list=20%, signal=47%						KEGG_AMINO_SUGAR_AND_NUCLEOTIDE_SUGAR_METABOLISM	KEGG_AMINO_SUGAR_AND_NUCLEOTIDE_SUGAR_METABOLISM		44	-0.348418	-1.11951	0.347023	0.547736	1	3709	tags=39%, list=19%, signal=48%
KEGG_CYTOKINE_CYTOKINE_RECEPTOR_INTERACTION	KEGG_CYTOKINE_CYTOKINE_RECEPTOR_INTERACTION		262	0.388951	1.44404	0.117202	0.261286	0.946	4756	tags=33%, list=24%, signal=43%						KEGG_CYTOSOLIC_DNA_SENSING_PATHWAY	KEGG_CYTOSOLIC_DNA_SENSING_PATHWAY		53	-0.314664	-1.09927	0.380952	0.566237	1	4548	tags=34%, list=23%, signal=44%
KEGG_TASTE_TRANSDUCTION	KEGG_TASTE_TRANSDUCTION		51	0.470972	1.43455	0.0985916	0.266547	0.95	7433	tags=57%, list=38%, signal=92%						KEGG_PANTOTHENATE_AND_COA_BIOSYNTHESIS	KEGG_PANTOTHENATE_AND_COA_BIOSYNTHESIS		16	-0.37458	-1.08533	0.348697	0.575306	1	3414	tags=31%, list=18%, signal=38%
KEGG_MTOR_SIGNALING_PATHWAY	KEGG_MTOR_SIGNALING_PATHWAY		51	0.387143	1.40464	0.0890269	0.299326	0.966	4341	tags=37%, list=22%, signal=48%						KEGG_PURINE_METABOLISM	KEGG_PURINE_METABOLISM		157	-0.24727	-1.08244	0.319838	0.565526	1	3311	tags=35%, list=17%, signal=42%
KEGG_ADIPOCYTOKINE_SIGNALING_PATHWAY	KEGG_ADIPOCYTOKINE_SIGNALING_PATHWAY		67	0.380554	1.40001	0.0708502	0.298187	0.967	4074	tags=25%, list=21%, signal=32%						KEGG_BASAL_TRANSCRIPTION_FACTORS	KEGG_BASAL_TRANSCRIPTION_FACTORS		35	-0.352578	-1.06901	0.41649	0.573333	1	5468	tags=54%, list=28%, signal=75%
KEGG_FC_GAMMA_R_MEDIATED_PHAGOCYTOSIS	KEGG_FC_GAMMA_R_MEDIATED_PHAGOCYTOSIS		95	0.34996	1.37528	0.123314	0.327745	0.976	5008	tags=36%, list=26%, signal=48%						KEGG_OOCYTE_MEIOSIS	KEGG_OOCYTE_MEIOSIS		112	-0.278847	-1.06403	0.386503	0.567289	1	2388	tags=25%, list=12%, signal=28%
KEGG_ARACHIDONIC_ACID_METABOLISM	KEGG_ARACHIDONIC_ACID_METABOLISM		57	0.392575	1.37011	0.114341	0.328189	0.979	4172	tags=25%, list=21%, signal=31%						KEGG_BLADDER_CANCER	KEGG_BLADDER_CANCER		42	-0.309124	-1.04009	0.392713	0.590585	1	4055	tags=45%, list=21%, signal=57%
KEGG_RENAL_CELL_CARCINOMA	KEGG_RENAL_CELL_CARCINOMA		70	0.365018	1.36639	0.128364	0.326486	0.979	5214	tags=41%, list=27%, signal=56%						KEGG_RIBOFLAVIN_METABOLISM	KEGG_RIBOFLAVIN_METABOLISM		16	-0.341984	-1.03072	0.444215	0.591719	1	3307	tags=38%, list=17%, signal=45%
KEGG_JAK_STAT_SIGNALING_PATHWAY	KEGG_JAK_STAT_SIGNALING_PATHWAY		155	0.35064	1.34489	0.131679	0.351478	0.985	5567	tags=34%, list=29%, signal=47%						KEGG_GLYCINE_SERINE_AND_THREONINE_METABOLISM	KEGG_GLYCINE_SERINE_AND_THREONINE_METABOLISM		31	-0.291481	-0.989876	0.449275	0.644612	1	518	tags=16%, list=3%, signal=17%
KEGG_ALDOSTERONE_REGULATED_SODIUM_REABSORPTION	KEGG_ALDOSTERONE_REGULATED_SODIUM_REABSORPTION		42	0.374707	1.34122	0.0802348	0.350053	0.986	5423	tags=38%, list=28%, signal=53%						KEGG_BUTANOATE_METABOLISM	KEGG_BUTANOATE_METABOLISM		34	-0.308938	-0.983898	0.465347	0.640276	1	3023	tags=26%, list=15%, signal=31%
KEGG_O_GLYCAN_BIOSYNTHESIS	KEGG_O_GLYCAN_BIOSYNTHESIS		30	0.441616	1.33493	0.154013	0.351719	0.986	899	tags=13%, list=5%, signal=14%						KEGG_ANTIGEN_PROCESSING_AND_PRESENTATION	KEGG_ANTIGEN_PROCESSING_AND_PRESENTATION		80	-0.29838	-0.967718	0.455487	0.652135	1	2289	tags=16%, list=12%, signal=18%
KEGG_ENDOCYTOSIS	KEGG_ENDOCYTOSIS		181	0.324459	1.32933	0.115226	0.353372	0.986	5219	tags=36%, list=27%, signal=49%						KEGG_PENTOSE_AND_GLUCURONATE_INTERCONVERSIONS	KEGG_PENTOSE_AND_GLUCURONATE_INTERCONVERSIONS		28	-0.356692	-0.9498	0.487952	0.667783	1	7018	tags=61%, list=36%, signal=95%
KEGG_FC_EPSILON_RI_SIGNALING_PATHWAY	KEGG_FC_EPSILON_RI_SIGNALING_PATHWAY		79	0.348473	1.30839	0.163022	0.377568	0.989	6115	tags=42%, list=31%, signal=61%						KEGG_ARGININE_AND_PROLINE_METABOLISM	KEGG_ARGININE_AND_PROLINE_METABOLISM		54	-0.250873	-0.934379	0.546351	0.679979	1	4035	tags=39%, list=21%, signal=49%
KEGG_TIGHT_JUNCTION	KEGG_TIGHT_JUNCTION		131	0.302914	1.29208	0.10883	0.395018	0.992	3385	tags=21%, list=17%, signal=26%						KEGG_PYRUVATE_METABOLISM	KEGG_PYRUVATE_METABOLISM		40	-0.286562	-0.934368	0.533199	0.666408	1	5521	tags=48%, list=28%, signal=66%
KEGG_PRION_DISEASES	KEGG_PRION_DISEASES		35	0.401367	1.2914	0.14881	0.38821	0.992	3875	tags=26%, list=20%, signal=32%						KEGG_GALACTOSE_METABOLISM	KEGG_GALACTOSE_METABOLISM		26	-0.283232	-0.933208	0.570866	0.654995	1	1926	tags=19%, list=10%, signal=21%
KEGG_GLIOMA	KEGG_GLIOMA		65	0.340447	1.28841	0.136929	0.385124	0.993	5715	tags=42%, list=29%, signal=59%						KEGG_SELENOAMINO_ACID_METABOLISM	KEGG_SELENOAMINO_ACID_METABOLISM		25	-0.31141	-0.914579	0.577778	0.671237	1	5060	tags=56%, list=26%, signal=76%
KEGG_TYPE_II_DIABETES_MELLITUS	KEGG_TYPE_II_DIABETES_MELLITUS		47	0.355037	1.28129	0.133065	0.389657	0.997	4894	tags=34%, list=25%, signal=45%						KEGG_PEROXISOME	KEGG_PEROXISOME		78	-0.252241	-0.835833	0.637081	0.784333	1	5965	tags=44%, list=31%, signal=63%
KEGG_ERBB_SIGNALING_PATHWAY	KEGG_ERBB_SIGNALING_PATHWAY		87	0.344518	1.28103	0.162933	0.382846	0.997	4341	tags=31%, list=22%, signal=40%						KEGG_BIOSYNTHESIS_OF_UNSATURATED_FATTY_ACIDS	KEGG_BIOSYNTHESIS_OF_UNSATURATED_FATTY_ACIDS		22	-0.268063	-0.801025	0.700787	0.825036	1	4337	tags=41%, list=22%, signal=53%
KEGG_RENIN_ANGIOTENSIN_SYSTEM	KEGG_RENIN_ANGIOTENSIN_SYSTEM		17	0.448327	1.26974	0.162698	0.392752	0.997	2898	tags=35%, list=15%, signal=41%						KEGG_UBIQUITIN_MEDIATED_PROTEOLYSIS	KEGG_UBIQUITIN_MEDIATED_PROTEOLYSIS		133	-0.217099	-0.782666	0.719758	0.838729	1	4800	tags=36%, list=25%, signal=48%
KEGG_VEGF_SIGNALING_PATHWAY	KEGG_VEGF_SIGNALING_PATHWAY		76	0.316074	1.26935	0.148	0.386319	0.997	5609	tags=34%, list=29%, signal=48%						KEGG_GLYCOSPHINGOLIPID_BIOSYNTHESIS_LACTO_AND_NEOLACTO_SERIES	KEGG_GLYCOSPHINGOLIPID_BIOSYNTHESIS_LACTO_AND_NEOLACTO_SERIES		26	-0.225892	-0.77484	0.796443	0.835974	1	2261	tags=23%, list=12%, signal=26%
KEGG_ACUTE_MYELOID_LEUKEMIA	KEGG_ACUTE_MYELOID_LEUKEMIA		57	0.364765	1.26866	0.192	0.38076	0.997	4341	tags=32%, list=22%, signal=41%						KEGG_MATURITY_ONSET_DIABETES_OF_THE_YOUNG	KEGG_MATURITY_ONSET_DIABETES_OF_THE_YOUNG		25	-0.307715	-0.773352	0.742857	0.823359	1	4541	tags=40%, list=23%, signal=52%
KEGG_ENDOMETRIAL_CANCER	KEGG_ENDOMETRIAL_CANCER		52	0.357077	1.2639	0.190669	0.381316	0.997	5008	tags=37%, list=26%, signal=49%						KEGG_VALINE_LEUCINE_AND_ISOLEUCINE_DEGRADATION	KEGG_VALINE_LEUCINE_AND_ISOLEUCINE_DEGRADATION		44	-0.243618	-0.715185	0.750487	0.892366	1	5496	tags=45%, list=28%, signal=63%
KEGG_TYROSINE_METABOLISM	KEGG_TYROSINE_METABOLISM		42	0.334881	1.26371	0.140039	0.375173	0.997	1618	tags=17%, list=8%, signal=18%						KEGG_OTHER_GLYCAN_DEGRADATION	KEGG_OTHER_GLYCAN_DEGRADATION		16	-0.283958	-0.709729	0.763158	0.884677	1	6515	tags=56%, list=33%, signal=84%
KEGG_ETHER_LIPID_METABOLISM	KEGG_ETHER_LIPID_METABOLISM		33	0.379566	1.26105	0.163223	0.37285	0.997	4172	tags=30%, list=21%, signal=38%						KEGG_PROXIMAL_TUBULE_BICARBONATE_RECLAMATION	KEGG_PROXIMAL_TUBULE_BICARBONATE_RECLAMATION		23	-0.234888	-0.692215	0.883768	0.893844	1	4639	tags=43%, list=24%, signal=57%
KEGG_INSULIN_SIGNALING_PATHWAY	KEGG_INSULIN_SIGNALING_PATHWAY		137	0.308397	1.25986	0.163306	0.36789	0.997	4341	tags=27%, list=22%, signal=34%						KEGG_LYSINE_DEGRADATION	KEGG_LYSINE_DEGRADATION		44	-0.218126	-0.678358	0.84413	0.895664	1	1721	tags=16%, list=9%, signal=17%
KEGG_NICOTINATE_AND_NICOTINAMIDE_METABOLISM	KEGG_NICOTINATE_AND_NICOTINAMIDE_METABOLISM		24	0.364619	1.25052	0.140787	0.374988	0.998	2867	tags=25%, list=15%, signal=29%						KEGG_NITROGEN_METABOLISM	KEGG_NITROGEN_METABOLISM		23	-0.182841	-0.570852	0.976048	0.981502	1	3918	tags=30%, list=20%, signal=38%
KEGG_COLORECTAL_CANCER	KEGG_COLORECTAL_CANCER		62	0.333549	1.24877	0.195695	0.371408	0.998	5008	tags=34%, list=26%, signal=45%						KEGG_STARCH_AND_SUCROSE_METABOLISM	KEGG_STARCH_AND_SUCROSE_METABOLISM		51	-0.160917	-0.554582	0.99004	0.976383	1	5094	tags=31%, list=26%, signal=42%
KEGG_GLYCOSAMINOGLYCAN_BIOSYNTHESIS_HEPARAN_SULFATE	KEGG_GLYCOSAMINOGLYCAN_BIOSYNTHESIS_HEPARAN_SULFATE		26	0.398375	1.23117	0.2	0.387913	0.999	5204	tags=35%, list=27%, signal=47%						KEGG_ASCORBATE_AND_ALDARATE_METABOLISM	KEGG_ASCORBATE_AND_ALDARATE_METABOLISM		25	-0.196449	-0.536229	0.968566	0.970915	1	7140	tags=52%, list=37%, signal=82%
KEGG_HISTIDINE_METABOLISM	KEGG_HISTIDINE_METABOLISM		29	0.344687	1.21847	0.173307	0.39867	1	6631	tags=41%, list=34%, signal=63%						KEGG_GRAFT_VERSUS_HOST_DISEASE	KEGG_GRAFT_VERSUS_HOST_DISEASE		37	-0.196887	-0.502294	0.893528	0.971399	1	15673	tags=100%, list=80%, signal=508%
KEGG_AMYOTROPHIC_LATERAL_SCLEROSIS_ALS	KEGG_AMYOTROPHIC_LATERAL_SCLEROSIS_ALS		52	0.299177	1.18782	0.191781	0.436086	1	2859	tags=21%, list=15%, signal=25%
KEGG_PROSTATE_CANCER	KEGG_PROSTATE_CANCER		89	0.303281	1.18512	0.224852	0.433513	1	5054	tags=30%, list=26%, signal=41%
KEGG_TRYPTOPHAN_METABOLISM	KEGG_TRYPTOPHAN_METABOLISM		39	0.321552	1.18483	0.235529	0.427517	1	2156	tags=13%, list=11%, signal=14%
KEGG_GLYCEROLIPID_METABOLISM	KEGG_GLYCEROLIPID_METABOLISM		48	0.324293	1.18308	0.202429	0.423768	1	4201	tags=25%, list=22%, signal=32%
KEGG_INTESTINAL_IMMUNE_NETWORK_FOR_IGA_PRODUCTION	KEGG_INTESTINAL_IMMUNE_NETWORK_FOR_IGA_PRODUCTION		46	0.443796	1.18205	0.330769	0.419395	1	4036	tags=30%, list=21%, signal=38%
KEGG_PPAR_SIGNALING_PATHWAY	KEGG_PPAR_SIGNALING_PATHWAY		69	0.349646	1.17184	0.253061	0.427176	1	5864	tags=39%, list=30%, signal=56%
KEGG_GLYCOSAMINOGLYCAN_DEGRADATION	KEGG_GLYCOSAMINOGLYCAN_DEGRADATION		21	0.388012	1.15466	0.313725	0.445078	1	4190	tags=24%, list=21%, signal=30%
KEGG_SYSTEMIC_LUPUS_ERYTHEMATOSUS	KEGG_SYSTEMIC_LUPUS_ERYTHEMATOSUS		55	0.398416	1.15407	0.339181	0.43987	1	4069	tags=27%, list=21%, signal=34%
KEGG_ASTHMA	KEGG_ASTHMA		28	0.480134	1.15215	0.350775	0.436531	1	3828	tags=21%, list=20%, signal=27%
KEGG_B_CELL_RECEPTOR_SIGNALING_PATHWAY	KEGG_B_CELL_RECEPTOR_SIGNALING_PATHWAY		75	0.345763	1.1403	0.334	0.446505	1	5611	tags=41%, list=29%, signal=58%
KEGG_GLYCEROPHOSPHOLIPID_METABOLISM	KEGG_GLYCEROPHOSPHOLIPID_METABOLISM		77	0.276797	1.118	0.266667	0.470336	1	4172	tags=26%, list=21%, signal=33%
KEGG_T_CELL_RECEPTOR_SIGNALING_PATHWAY	KEGG_T_CELL_RECEPTOR_SIGNALING_PATHWAY		108	0.316695	1.11403	0.364504	0.469571	1	6313	tags=43%, list=32%, signal=63%
KEGG_PROGESTERONE_MEDIATED_OOCYTE_MATURATION	KEGG_PROGESTERONE_MEDIATED_OOCYTE_MATURATION		85	0.287043	1.09468	0.347059	0.490465	1	3075	tags=25%, list=16%, signal=29%
KEGG_TOLL_LIKE_RECEPTOR_SIGNALING_PATHWAY	KEGG_TOLL_LIKE_RECEPTOR_SIGNALING_PATHWAY		101	0.296378	1.09433	0.330827	0.48463	1	5063	tags=27%, list=26%, signal=36%
KEGG_EPITHELIAL_CELL_SIGNALING_IN_HELICOBACTER_PYLORI_INFECTION	KEGG_EPITHELIAL_CELL_SIGNALING_IN_HELICOBACTER_PYLORI_INFECTION		68	0.284517	1.09046	0.296512	0.484013	1	3584	tags=18%, list=18%, signal=22%
KEGG_APOPTOSIS	KEGG_APOPTOSIS		86	0.293022	1.07521	0.366472	0.499592	1	4341	tags=26%, list=22%, signal=33%
KEGG_PHENYLALANINE_METABOLISM	KEGG_PHENYLALANINE_METABOLISM		18	0.318407	1.03782	0.389414	0.549462	1	1618	tags=17%, list=8%, signal=18%
KEGG_CARDIAC_MUSCLE_CONTRACTION	KEGG_CARDIAC_MUSCLE_CONTRACTION		73	0.292766	1.02164	0.422349	0.567116	1	1868	tags=19%, list=10%, signal=21%
KEGG_SMALL_CELL_LUNG_CANCER	KEGG_SMALL_CELL_LUNG_CANCER		84	0.277825	1.01495	0.448077	0.570451	1	5063	tags=36%, list=26%, signal=48%
KEGG_ALPHA_LINOLENIC_ACID_METABOLISM	KEGG_ALPHA_LINOLENIC_ACID_METABOLISM		19	0.339088	0.988756	0.474542	0.604429	1	7719	tags=42%, list=40%, signal=70%
KEGG_REGULATION_OF_AUTOPHAGY	KEGG_REGULATION_OF_AUTOPHAGY		34	0.300622	0.98866	0.487129	0.597577	1	5320	tags=26%, list=27%, signal=36%
KEGG_PANCREATIC_CANCER	KEGG_PANCREATIC_CANCER		70	0.254644	0.981488	0.480469	0.601951	1	4479	tags=24%, list=23%, signal=31%
KEGG_SNARE_INTERACTIONS_IN_VESICULAR_TRANSPORT	KEGG_SNARE_INTERACTIONS_IN_VESICULAR_TRANSPORT		38	0.273841	0.97164	0.484496	0.609613	1	5371	tags=32%, list=28%, signal=43%
KEGG_VIRAL_MYOCARDITIS	KEGG_VIRAL_MYOCARDITIS		68	0.282805	0.95858	0.467043	0.621309	1	5876	tags=32%, list=30%, signal=46%
KEGG_LEISHMANIA_INFECTION	KEGG_LEISHMANIA_INFECTION		68	0.300004	0.942753	0.502835	0.639023	1	4695	tags=25%, list=24%, signal=33%
KEGG_CHRONIC_MYELOID_LEUKEMIA	KEGG_CHRONIC_MYELOID_LEUKEMIA		73	0.259338	0.935995	0.573441	0.642528	1	5219	tags=32%, list=27%, signal=43%
KEGG_NON_SMALL_CELL_LUNG_CANCER	KEGG_NON_SMALL_CELL_LUNG_CANCER		54	0.257073	0.92173	0.575099	0.6571	1	6672	tags=44%, list=34%, signal=67%
KEGG_NOD_LIKE_RECEPTOR_SIGNALING_PATHWAY	KEGG_NOD_LIKE_RECEPTOR_SIGNALING_PATHWAY		62	0.246793	0.869724	0.631179	0.730244	1	2882	tags=16%, list=15%, signal=19%
KEGG_STEROID_HORMONE_BIOSYNTHESIS	KEGG_STEROID_HORMONE_BIOSYNTHESIS		55	0.267585	0.867267	0.625239	0.726142	1	924	tags=7%, list=5%, signal=8%
KEGG_BETA_ALANINE_METABOLISM	KEGG_BETA_ALANINE_METABOLISM		22	0.268495	0.854469	0.65737	0.738288	1	4724	tags=27%, list=24%, signal=36%
KEGG_THYROID_CANCER	KEGG_THYROID_CANCER		29	0.259964	0.854073	0.654618	0.731295	1	4074	tags=28%, list=21%, signal=35%
KEGG_DRUG_METABOLISM_CYTOCHROME_P450	KEGG_DRUG_METABOLISM_CYTOCHROME_P450		70	0.278493	0.840993	0.634298	0.743529	1	4794	tags=20%, list=25%, signal=26%
KEGG_FATTY_ACID_METABOLISM	KEGG_FATTY_ACID_METABOLISM		42	0.268212	0.833617	0.615546	0.747221	1	5038	tags=24%, list=26%, signal=32%
KEGG_PRIMARY_IMMUNODEFICIENCY	KEGG_PRIMARY_IMMUNODEFICIENCY		35	0.312783	0.824264	0.626617	0.753666	1	7962	tags=57%, list=41%, signal=96%
KEGG_METABOLISM_OF_XENOBIOTICS_BY_CYTOCHROME_P450	KEGG_METABOLISM_OF_XENOBIOTICS_BY_CYTOCHROME_P450		68	0.27169	0.822601	0.65587	0.748737	1	1335	tags=7%, list=7%, signal=8%
KEGG_RIG_I_LIKE_RECEPTOR_SIGNALING_PATHWAY	KEGG_RIG_I_LIKE_RECEPTOR_SIGNALING_PATHWAY		70	0.213044	0.813181	0.733333	0.754915	1	5645	tags=24%, list=29%, signal=34%
KEGG_OLFACTORY_TRANSDUCTION	KEGG_OLFACTORY_TRANSDUCTION		371	0.273637	0.790605	0.608445	0.779806	1	9667	tags=49%, list=50%, signal=94%
KEGG_NOTCH_SIGNALING_PATHWAY	KEGG_NOTCH_SIGNALING_PATHWAY		47	0.233721	0.776559	0.708	0.792551	1	4298	tags=26%, list=22%, signal=33%
KEGG_PROPANOATE_METABOLISM	KEGG_PROPANOATE_METABOLISM		32	0.249004	0.717354	0.742857	0.867444	1	2767	tags=16%, list=14%, signal=18%
KEGG_NATURAL_KILLER_CELL_MEDIATED_CYTOTOXICITY	KEGG_NATURAL_KILLER_CELL_MEDIATED_CYTOTOXICITY		131	0.188087	0.685272	0.812253	0.899342	1	6674	tags=31%, list=34%, signal=46%
KEGG_GLYCOSAMINOGLYCAN_BIOSYNTHESIS_KERATAN_SULFATE	KEGG_GLYCOSAMINOGLYCAN_BIOSYNTHESIS_KERATAN_SULFATE		15	0.234699	0.651125	0.873684	0.928807	1	5105	tags=33%, list=26%, signal=45%
KEGG_AUTOIMMUNE_THYROID_DISEASE	KEGG_AUTOIMMUNE_THYROID_DISEASE		50	0.221749	0.63605	0.789572	0.935424	1	8169	tags=32%, list=42%, signal=55%
KEGG_SPHINGOLIPID_METABOLISM	KEGG_SPHINGOLIPID_METABOLISM		39	0.194513	0.630296	0.907258	0.932406	1	2454	tags=10%, list=13%, signal=12%
KEGG_LYSOSOME	KEGG_LYSOSOME		121	0.177154	0.602187	0.865462	0.949012	1	2517	tags=10%, list=13%, signal=11%
KEGG_LINOLEIC_ACID_METABOLISM	KEGG_LINOLEIC_ACID_METABOLISM		29	0.202056	0.592137	0.940206	0.948437	1	8885	tags=45%, list=46%, signal=82%
KEGG_ALLOGRAFT_REJECTION	KEGG_ALLOGRAFT_REJECTION		35	0.237961	0.57585	0.809612	0.950664	1	4036	tags=17%, list=21%, signal=22%
KEGG_TYPE_I_DIABETES_MELLITUS	KEGG_TYPE_I_DIABETES_MELLITUS		41	0.20594	0.553505	0.862453	0.955444	1	4208	tags=15%, list=22%, signal=19%
KEGG_RETINOL_METABOLISM	KEGG_RETINOL_METABOLISM		64	0.129937	0.392676	1	0.993443	1	6973	tags=23%, list=36%, signal=36%

## Sheet: SLC9A3R1
HIGH																LOW
NAME	GS<br> follow link to MSigDB	GS DETAILS	SIZE	ES	NES	NOM p-val	FDR q-val	FWER p-val	RANK AT MAX	LEADING EDGE						NAME	GS<br> follow link to MSigDB	GS DETAILS	SIZE	ES	NES	NOM p-val	FDR q-val	FWER p-val	RANK AT MAX	LEADING EDGE
KEGG_SPHINGOLIPID_METABOLISM	KEGG_SPHINGOLIPID_METABOLISM	Details ...	39	0.586507	1.86907	0.00204499	0.266845	0.15	2134	tags=46%, list=11%, signal=52%						KEGG_DILATED_CARDIOMYOPATHY	KEGG_DILATED_CARDIOMYOPATHY	Details ...	90	-0.523711	-1.7527	0.0132325	0.943407	0.396	2288	tags=39%, list=12%, signal=44%
KEGG_ALANINE_ASPARTATE_AND_GLUTAMATE_METABOLISM	KEGG_ALANINE_ASPARTATE_AND_GLUTAMATE_METABOLISM	Details ...	30	0.584528	1.84867	0.00398406	0.165209	0.179	3080	tags=50%, list=16%, signal=59%						KEGG_HYPERTROPHIC_CARDIOMYOPATHY_HCM	KEGG_HYPERTROPHIC_CARDIOMYOPATHY_HCM	Details ...	83	-0.501035	-1.66387	0.0224719	0.958073	0.585	4222	tags=49%, list=22%, signal=63%
KEGG_GLUTATHIONE_METABOLISM	KEGG_GLUTATHIONE_METABOLISM	Details ...	47	0.550975	1.8329	0.0040568	0.134399	0.203	1842	tags=40%, list=9%, signal=45%						KEGG_VASCULAR_SMOOTH_MUSCLE_CONTRACTION	KEGG_VASCULAR_SMOOTH_MUSCLE_CONTRACTION	Details ...	115	-0.466428	-1.63805	0.0337302	0.772561	0.641	3802	tags=42%, list=19%, signal=52%
KEGG_PEROXISOME	KEGG_PEROXISOME	Details ...	78	0.584617	1.82725	0.00849257	0.107982	0.214	4987	tags=67%, list=26%, signal=89%						KEGG_CALCIUM_SIGNALING_PATHWAY	KEGG_CALCIUM_SIGNALING_PATHWAY	Details ...	177	-0.417732	-1.57641	0.0236686	0.887906	0.766	4535	tags=41%, list=23%, signal=53%
KEGG_PENTOSE_AND_GLUCURONATE_INTERCONVERSIONS	KEGG_PENTOSE_AND_GLUCURONATE_INTERCONVERSIONS	Details ...	28	0.729204	1.81561	0.00767754	0.0944856	0.233	3444	tags=68%, list=18%, signal=82%						KEGG_ARRHYTHMOGENIC_RIGHT_VENTRICULAR_CARDIOMYOPATHY_ARVC	KEGG_ARRHYTHMOGENIC_RIGHT_VENTRICULAR_CARDIOMYOPATHY_ARVC	Details ...	74	-0.450045	-1.51648	0.0773694	0.999364	0.868	2183	tags=35%, list=11%, signal=39%
KEGG_DRUG_METABOLISM_OTHER_ENZYMES	KEGG_DRUG_METABOLISM_OTHER_ENZYMES	Details ...	51	0.599697	1.80664	0.00588235	0.0884093	0.251	4266	tags=57%, list=22%, signal=73%						KEGG_NEUROACTIVE_LIGAND_RECEPTOR_INTERACTION	KEGG_NEUROACTIVE_LIGAND_RECEPTOR_INTERACTION	Details ...	271	-0.414943	-1.46027	0.0422535	1	0.921	6362	tags=49%, list=33%, signal=72%
KEGG_PENTOSE_PHOSPHATE_PATHWAY	KEGG_PENTOSE_PHOSPHATE_PATHWAY	Details ...	27	0.607959	1.77138	0.00386847	0.112656	0.332	2615	tags=52%, list=13%, signal=60%						KEGG_MAPK_SIGNALING_PATHWAY	KEGG_MAPK_SIGNALING_PATHWAY	Details ...	267	-0.33072	-1.35663	0.106931	1	0.977	6083	tags=42%, list=31%, signal=60%
KEGG_BUTANOATE_METABOLISM	KEGG_BUTANOATE_METABOLISM	Details ...	34	0.572718	1.71502	0.0247934	0.170395	0.456	3080	tags=53%, list=16%, signal=63%						KEGG_FOCAL_ADHESION	KEGG_FOCAL_ADHESION	Details ...	199	-0.377453	-1.35031	0.159136	1	0.979	4536	tags=39%, list=23%, signal=51%
KEGG_RETINOL_METABOLISM	KEGG_RETINOL_METABOLISM	Details ...	64	0.602503	1.70356	0.020284	0.166227	0.48	4045	tags=61%, list=21%, signal=77%						KEGG_HEMATOPOIETIC_CELL_LINEAGE	KEGG_HEMATOPOIETIC_CELL_LINEAGE	Details ...	84	-0.42178	-1.31288	0.182222	1	0.988	8000	tags=68%, list=41%, signal=115%
KEGG_PORPHYRIN_AND_CHLOROPHYLL_METABOLISM	KEGG_PORPHYRIN_AND_CHLOROPHYLL_METABOLISM	Details ...	40	0.585045	1.7034	0.0199601	0.150224	0.482	4279	tags=60%, list=22%, signal=77%						KEGG_ECM_RECEPTOR_INTERACTION	KEGG_ECM_RECEPTOR_INTERACTION	Details ...	83	-0.432614	-1.30985	0.216963	1	0.989	4681	tags=52%, list=24%, signal=68%
KEGG_N_GLYCAN_BIOSYNTHESIS	KEGG_N_GLYCAN_BIOSYNTHESIS	Details ...	46	0.5633	1.68615	0.0192678	0.157022	0.523	3587	tags=54%, list=18%, signal=66%						KEGG_TASTE_TRANSDUCTION	KEGG_TASTE_TRANSDUCTION	Details ...	51	-0.43018	-1.29977	0.17418	1	0.99	7594	tags=61%, list=39%, signal=99%
KEGG_FRUCTOSE_AND_MANNOSE_METABOLISM	KEGG_FRUCTOSE_AND_MANNOSE_METABOLISM	Details ...	34	0.561742	1.66817	0.0382294	0.166998	0.569	2437	tags=47%, list=12%, signal=54%						KEGG_MELANOGENESIS	KEGG_MELANOGENESIS	Details ...	101	-0.338151	-1.28878	0.150097	1	0.991	4845	tags=34%, list=25%, signal=45%
KEGG_SELENOAMINO_ACID_METABOLISM	KEGG_SELENOAMINO_ACID_METABOLISM	Details ...	25	0.530895	1.63486	0.0194175	0.199814	0.656	1796	tags=32%, list=9%, signal=35%						KEGG_ASTHMA	KEGG_ASTHMA	Details ...	28	-0.504618	-1.28676	0.240449	1	0.991	7658	tags=75%, list=39%, signal=123%
KEGG_METABOLISM_OF_XENOBIOTICS_BY_CYTOCHROME_P450	KEGG_METABOLISM_OF_XENOBIOTICS_BY_CYTOCHROME_P450	Details ...	68	0.553357	1.60861	0.0650888	0.222473	0.71	3631	tags=59%, list=19%, signal=72%						KEGG_CARDIAC_MUSCLE_CONTRACTION	KEGG_CARDIAC_MUSCLE_CONTRACTION	Details ...	73	-0.365313	-1.26579	0.197183	1	0.995	1920	tags=22%, list=10%, signal=24%
KEGG_AMINOACYL_TRNA_BIOSYNTHESIS	KEGG_AMINOACYL_TRNA_BIOSYNTHESIS	Details ...	22	0.662804	1.60378	0.0589391	0.215218	0.717	3969	tags=68%, list=20%, signal=86%						KEGG_GAP_JUNCTION	KEGG_GAP_JUNCTION	Details ...	89	-0.337093	-1.25767	0.202729	1	0.995	5895	tags=45%, list=30%, signal=64%
KEGG_STEROID_BIOSYNTHESIS	KEGG_STEROID_BIOSYNTHESIS	Details ...	17	0.714456	1.58923	0.0621242	0.222238	0.747	4098	tags=76%, list=21%, signal=97%						KEGG_JAK_STAT_SIGNALING_PATHWAY	KEGG_JAK_STAT_SIGNALING_PATHWAY	Details ...	155	-0.316304	-1.2446	0.196721	1	0.997	6284	tags=38%, list=32%, signal=56%
KEGG_GLYCEROPHOSPHOLIPID_METABOLISM	KEGG_GLYCEROPHOSPHOLIPID_METABOLISM	Details ...	77	0.412333	1.58698	0.0248963	0.212153	0.755	2633	tags=36%, list=13%, signal=42%						KEGG_AMYOTROPHIC_LATERAL_SCLEROSIS_ALS	KEGG_AMYOTROPHIC_LATERAL_SCLEROSIS_ALS	Details ...	52	-0.304298	-1.24448	0.136364	1	0.997	1709	tags=21%, list=9%, signal=23%
KEGG_OTHER_GLYCAN_DEGRADATION	KEGG_OTHER_GLYCAN_DEGRADATION	Details ...	16	0.658561	1.58604	0.0382294	0.201641	0.758	5672	tags=81%, list=29%, signal=114%						KEGG_SYSTEMIC_LUPUS_ERYTHEMATOSUS	KEGG_SYSTEMIC_LUPUS_ERYTHEMATOSUS	Details ...	55	-0.405024	-1.22566	0.239651	1	0.998	7418	tags=53%, list=38%, signal=85%
KEGG_AMINO_SUGAR_AND_NUCLEOTIDE_SUGAR_METABOLISM	KEGG_AMINO_SUGAR_AND_NUCLEOTIDE_SUGAR_METABOLISM	Details ...	44	0.505601	1.56814	0.0545455	0.215326	0.79	2962	tags=45%, list=15%, signal=53%						KEGG_LEUKOCYTE_TRANSENDOTHELIAL_MIGRATION	KEGG_LEUKOCYTE_TRANSENDOTHELIAL_MIGRATION	Details ...	115	-0.311495	-1.2151	0.189076	1	1	6557	tags=47%, list=34%, signal=70%
KEGG_TERPENOID_BACKBONE_BIOSYNTHESIS	KEGG_TERPENOID_BACKBONE_BIOSYNTHESIS	Details ...	15	0.667181	1.56366	0.0855397	0.209777	0.8	3983	tags=80%, list=20%, signal=100%						KEGG_CHEMOKINE_SIGNALING_PATHWAY	KEGG_CHEMOKINE_SIGNALING_PATHWAY	Details ...	187	-0.304239	-1.20984	0.190678	0.973189	1	6577	tags=44%, list=34%, signal=66%
KEGG_FATTY_ACID_METABOLISM	KEGG_FATTY_ACID_METABOLISM		42	0.505006	1.54743	0.0853659	0.221591	0.831	3261	tags=50%, list=17%, signal=60%						KEGG_AXON_GUIDANCE	KEGG_AXON_GUIDANCE		129	-0.302644	-1.2001	0.230616	0.958601	1	3289	tags=27%, list=17%, signal=32%
KEGG_CITRATE_CYCLE_TCA_CYCLE	KEGG_CITRATE_CYCLE_TCA_CYCLE		30	0.574593	1.5153	0.110883	0.255809	0.88	4198	tags=43%, list=22%, signal=55%						KEGG_REGULATION_OF_ACTIN_CYTOSKELETON	KEGG_REGULATION_OF_ACTIN_CYTOSKELETON		212	-0.288453	-1.18795	0.228	0.953499	1	6250	tags=42%, list=32%, signal=62%
KEGG_ASCORBATE_AND_ALDARATE_METABOLISM	KEGG_ASCORBATE_AND_ALDARATE_METABOLISM		25	0.641977	1.51497	0.0925553	0.245154	0.88	3444	tags=64%, list=18%, signal=78%						KEGG_CYTOKINE_CYTOKINE_RECEPTOR_INTERACTION	KEGG_CYTOKINE_CYTOKINE_RECEPTOR_INTERACTION		262	-0.316332	-1.18374	0.242553	0.925005	1	7757	tags=50%, list=40%, signal=82%
KEGG_DRUG_METABOLISM_CYTOCHROME_P450	KEGG_DRUG_METABOLISM_CYTOCHROME_P450		70	0.503475	1.50298	0.101594	0.250796	0.889	3631	tags=53%, list=19%, signal=65%						KEGG_TGF_BETA_SIGNALING_PATHWAY	KEGG_TGF_BETA_SIGNALING_PATHWAY		85	-0.322077	-1.17195	0.297087	0.923374	1	5069	tags=38%, list=26%, signal=51%
KEGG_STARCH_AND_SUCROSE_METABOLISM	KEGG_STARCH_AND_SUCROSE_METABOLISM		51	0.461357	1.50221	0.0736196	0.241513	0.891	4380	tags=51%, list=22%, signal=66%						KEGG_PRION_DISEASES	KEGG_PRION_DISEASES		35	-0.328123	-1.13537	0.274892	0.995322	1	3460	tags=26%, list=18%, signal=31%
KEGG_GLYCOLYSIS_GLUCONEOGENESIS	KEGG_GLYCOLYSIS_GLUCONEOGENESIS		61	0.422166	1.48395	0.0688976	0.255609	0.912	4380	tags=51%, list=22%, signal=65%						KEGG_LEISHMANIA_INFECTION	KEGG_LEISHMANIA_INFECTION		68	-0.358272	-1.13425	0.315436	0.960848	1	7463	tags=59%, list=38%, signal=95%
KEGG_LINOLEIC_ACID_METABOLISM	KEGG_LINOLEIC_ACID_METABOLISM		29	0.500641	1.46354	0.0776892	0.274412	0.929	3808	tags=48%, list=20%, signal=60%						KEGG_GLYCOSAMINOGLYCAN_BIOSYNTHESIS_CHONDROITIN_SULFATE	KEGG_GLYCOSAMINOGLYCAN_BIOSYNTHESIS_CHONDROITIN_SULFATE		22	-0.450637	-1.11397	0.365805	0.983499	1	5679	tags=59%, list=29%, signal=83%
KEGG_DNA_REPLICATION	KEGG_DNA_REPLICATION		36	0.622663	1.45981	0.176909	0.270285	0.935	4421	tags=69%, list=23%, signal=90%						KEGG_PURINE_METABOLISM	KEGG_PURINE_METABOLISM		157	-0.240495	-1.09732	0.304703	0.996235	1	2617	tags=19%, list=13%, signal=22%
KEGG_MATURITY_ONSET_DIABETES_OF_THE_YOUNG	KEGG_MATURITY_ONSET_DIABETES_OF_THE_YOUNG		25	0.595294	1.45706	0.101215	0.264224	0.936	4866	tags=72%, list=25%, signal=96%						KEGG_MELANOMA	KEGG_MELANOMA		71	-0.28261	-1.07708	0.316222	1	1	4435	tags=31%, list=23%, signal=40%
KEGG_STEROID_HORMONE_BIOSYNTHESIS	KEGG_STEROID_HORMONE_BIOSYNTHESIS		55	0.486644	1.45698	0.0995935	0.255528	0.936	3569	tags=51%, list=18%, signal=62%						KEGG_CELL_ADHESION_MOLECULES_CAMS	KEGG_CELL_ADHESION_MOLECULES_CAMS		130	-0.280437	-1.06423	0.374179	1	1	6300	tags=45%, list=32%, signal=65%
KEGG_LYSOSOME	KEGG_LYSOSOME		121	0.435962	1.45351	0.0922131	0.251276	0.939	3646	tags=43%, list=19%, signal=53%						KEGG_BASAL_CELL_CARCINOMA	KEGG_BASAL_CELL_CARCINOMA		55	-0.298767	-1.05773	0.368952	1	1	4671	tags=33%, list=24%, signal=43%
KEGG_GLYCOSYLPHOSPHATIDYLINOSITOL_GPI_ANCHOR_BIOSYNTHESIS	KEGG_GLYCOSYLPHOSPHATIDYLINOSITOL_GPI_ANCHOR_BIOSYNTHESIS		24	0.506974	1.44711	0.117534	0.251778	0.942	5414	tags=67%, list=28%, signal=92%						KEGG_LONG_TERM_POTENTIATION	KEGG_LONG_TERM_POTENTIATION		70	-0.300283	-1.05638	0.409465	0.983903	1	4845	tags=36%, list=25%, signal=47%
KEGG_ARGININE_AND_PROLINE_METABOLISM	KEGG_ARGININE_AND_PROLINE_METABOLISM		54	0.403611	1.4364	0.0788382	0.258363	0.948	3970	tags=46%, list=20%, signal=58%						KEGG_OLFACTORY_TRANSDUCTION	KEGG_OLFACTORY_TRANSDUCTION		371	-0.370992	-1.03136	0.492505	1	1	9122	tags=63%, list=47%, signal=115%
KEGG_GLYCOSPHINGOLIPID_BIOSYNTHESIS_LACTO_AND_NEOLACTO_SERIES	KEGG_GLYCOSPHINGOLIPID_BIOSYNTHESIS_LACTO_AND_NEOLACTO_SERIES		26	0.474954	1.42136	0.100592	0.269671	0.958	1544	tags=35%, list=8%, signal=38%						KEGG_INTESTINAL_IMMUNE_NETWORK_FOR_IGA_PRODUCTION	KEGG_INTESTINAL_IMMUNE_NETWORK_FOR_IGA_PRODUCTION		46	-0.369961	-1.03094	0.450893	0.994384	1	7951	tags=70%, list=41%, signal=117%
KEGG_ARACHIDONIC_ACID_METABOLISM	KEGG_ARACHIDONIC_ACID_METABOLISM		57	0.384987	1.37565	0.0905512	0.324323	0.978	2286	tags=33%, list=12%, signal=38%						KEGG_SMALL_CELL_LUNG_CANCER	KEGG_SMALL_CELL_LUNG_CANCER		84	-0.266839	-1.01646	0.421589	1	1	4361	tags=32%, list=22%, signal=41%
KEGG_GLYCEROLIPID_METABOLISM	KEGG_GLYCEROLIPID_METABOLISM		48	0.376804	1.36129	0.10998	0.336402	0.98	4249	tags=46%, list=22%, signal=58%						KEGG_TIGHT_JUNCTION	KEGG_TIGHT_JUNCTION		131	-0.238031	-1.0104	0.417323	0.99194	1	2199	tags=18%, list=11%, signal=20%
KEGG_GLYOXYLATE_AND_DICARBOXYLATE_METABOLISM	KEGG_GLYOXYLATE_AND_DICARBOXYLATE_METABOLISM		16	0.547379	1.3602	0.160966	0.32877	0.981	4315	tags=56%, list=22%, signal=72%						KEGG_NEUROTROPHIN_SIGNALING_PATHWAY	KEGG_NEUROTROPHIN_SIGNALING_PATHWAY		125	-0.259288	-1.00441	0.450102	0.981558	1	6235	tags=39%, list=32%, signal=57%
KEGG_PROXIMAL_TUBULE_BICARBONATE_RECLAMATION	KEGG_PROXIMAL_TUBULE_BICARBONATE_RECLAMATION		23	0.464684	1.35884	0.120833	0.322014	0.981	2531	tags=43%, list=13%, signal=50%						KEGG_WNT_SIGNALING_PATHWAY	KEGG_WNT_SIGNALING_PATHWAY		150	-0.254826	-1.00382	0.438878	0.957124	1	4679	tags=29%, list=24%, signal=38%
KEGG_BASE_EXCISION_REPAIR	KEGG_BASE_EXCISION_REPAIR		33	0.532083	1.35262	0.195777	0.322685	0.986	4753	tags=61%, list=24%, signal=80%						KEGG_HEDGEHOG_SIGNALING_PATHWAY	KEGG_HEDGEHOG_SIGNALING_PATHWAY		56	-0.279245	-1.00223	0.463654	0.936658	1	4335	tags=27%, list=22%, signal=34%
KEGG_ETHER_LIPID_METABOLISM	KEGG_ETHER_LIPID_METABOLISM		33	0.397327	1.3232	0.131737	0.356394	0.992	3808	tags=39%, list=20%, signal=49%						KEGG_ADIPOCYTOKINE_SIGNALING_PATHWAY	KEGG_ADIPOCYTOKINE_SIGNALING_PATHWAY		67	-0.27754	-1.00174	0.451677	0.914662	1	4222	tags=28%, list=22%, signal=36%
KEGG_VALINE_LEUCINE_AND_ISOLEUCINE_DEGRADATION	KEGG_VALINE_LEUCINE_AND_ISOLEUCINE_DEGRADATION		44	0.448947	1.29951	0.240326	0.383058	0.995	4241	tags=48%, list=22%, signal=61%						KEGG_PHOSPHATIDYLINOSITOL_SIGNALING_SYSTEM	KEGG_PHOSPHATIDYLINOSITOL_SIGNALING_SYSTEM		76	-0.288545	-0.997495	0.472946	0.902727	1	4064	tags=33%, list=21%, signal=41%
KEGG_GALACTOSE_METABOLISM	KEGG_GALACTOSE_METABOLISM		26	0.407873	1.29446	0.16537	0.382365	0.995	5068	tags=46%, list=26%, signal=62%						KEGG_LONG_TERM_DEPRESSION	KEGG_LONG_TERM_DEPRESSION		70	-0.264438	-0.988438	0.466801	0.903095	1	1882	tags=19%, list=10%, signal=20%
KEGG_BIOSYNTHESIS_OF_UNSATURATED_FATTY_ACIDS	KEGG_BIOSYNTHESIS_OF_UNSATURATED_FATTY_ACIDS		22	0.419793	1.28803	0.196162	0.382122	0.995	1742	tags=36%, list=9%, signal=40%						KEGG_PROGESTERONE_MEDIATED_OOCYTE_MATURATION	KEGG_PROGESTERONE_MEDIATED_OOCYTE_MATURATION		85	-0.26514	-0.987633	0.458506	0.88383	1	5822	tags=36%, list=30%, signal=52%
KEGG_PYRIMIDINE_METABOLISM	KEGG_PYRIMIDINE_METABOLISM		98	0.376131	1.26393	0.226562	0.409694	0.997	4437	tags=39%, list=23%, signal=50%						KEGG_REGULATION_OF_AUTOPHAGY	KEGG_REGULATION_OF_AUTOPHAGY		34	-0.291583	-0.985601	0.490566	0.868154	1	2157	tags=15%, list=11%, signal=17%
KEGG_PROTEASOME	KEGG_PROTEASOME		44	0.509036	1.24241	0.293413	0.432989	0.998	6022	tags=66%, list=31%, signal=95%						KEGG_PRIMARY_IMMUNODEFICIENCY	KEGG_PRIMARY_IMMUNODEFICIENCY		35	-0.395651	-0.979107	0.505643	0.863346	1	7547	tags=63%, list=39%, signal=102%
KEGG_MISMATCH_REPAIR	KEGG_MISMATCH_REPAIR		23	0.521475	1.2301	0.294559	0.442753	0.998	4831	tags=57%, list=25%, signal=75%						KEGG_AUTOIMMUNE_THYROID_DISEASE	KEGG_AUTOIMMUNE_THYROID_DISEASE		50	-0.342329	-0.978292	0.456763	0.846156	1	7951	tags=54%, list=41%, signal=91%
KEGG_VIBRIO_CHOLERAE_INFECTION	KEGG_VIBRIO_CHOLERAE_INFECTION		54	0.321863	1.21861	0.209581	0.450794	0.999	2587	tags=28%, list=13%, signal=32%						KEGG_ADHERENS_JUNCTION	KEGG_ADHERENS_JUNCTION		73	-0.26258	-0.973917	0.492958	0.83786	1	1675	tags=19%, list=9%, signal=21%
KEGG_HISTIDINE_METABOLISM	KEGG_HISTIDINE_METABOLISM		29	0.36528	1.21659	0.231884	0.444912	0.999	4359	tags=45%, list=22%, signal=58%						KEGG_VASOPRESSIN_REGULATED_WATER_REABSORPTION	KEGG_VASOPRESSIN_REGULATED_WATER_REABSORPTION		44	-0.291909	-0.969291	0.486328	0.830182	1	6130	tags=39%, list=31%, signal=56%
KEGG_THYROID_CANCER	KEGG_THYROID_CANCER		29	0.379336	1.20036	0.267081	0.461395	0.999	1987	tags=28%, list=10%, signal=31%						KEGG_PATHWAYS_IN_CANCER	KEGG_PATHWAYS_IN_CANCER		325	-0.22386	-0.965376	0.522727	0.820805	1	4671	tags=28%, list=24%, signal=37%
KEGG_PANTOTHENATE_AND_COA_BIOSYNTHESIS	KEGG_PANTOTHENATE_AND_COA_BIOSYNTHESIS		16	0.424623	1.19051	0.246862	0.46753	0.999	2312	tags=38%, list=12%, signal=43%						KEGG_NOD_LIKE_RECEPTOR_SIGNALING_PATHWAY	KEGG_NOD_LIKE_RECEPTOR_SIGNALING_PATHWAY		62	-0.276431	-0.958867	0.520576	0.81703	1	4679	tags=32%, list=24%, signal=42%
KEGG_ENDOCYTOSIS	KEGG_ENDOCYTOSIS		181	0.281793	1.18569	0.238956	0.466764	0.999	2757	tags=27%, list=14%, signal=31%						KEGG_T_CELL_RECEPTOR_SIGNALING_PATHWAY	KEGG_T_CELL_RECEPTOR_SIGNALING_PATHWAY		108	-0.253774	-0.952794	0.511879	0.81379	1	6264	tags=45%, list=32%, signal=66%
KEGG_PPAR_SIGNALING_PATHWAY	KEGG_PPAR_SIGNALING_PATHWAY		69	0.335392	1.16436	0.27439	0.491994	0.999	2577	tags=30%, list=13%, signal=35%						KEGG_VIRAL_MYOCARDITIS	KEGG_VIRAL_MYOCARDITIS		68	-0.272001	-0.937553	0.5	0.828282	1	6377	tags=41%, list=33%, signal=61%
KEGG_NOTCH_SIGNALING_PATHWAY	KEGG_NOTCH_SIGNALING_PATHWAY		47	0.337497	1.15018	0.297244	0.505994	0.999	3012	tags=30%, list=15%, signal=35%						KEGG_B_CELL_RECEPTOR_SIGNALING_PATHWAY	KEGG_B_CELL_RECEPTOR_SIGNALING_PATHWAY		75	-0.286694	-0.933463	0.529915	0.820843	1	6264	tags=45%, list=32%, signal=67%
KEGG_PROPANOATE_METABOLISM	KEGG_PROPANOATE_METABOLISM		32	0.382686	1.11102	0.355865	0.561626	0.999	2904	tags=34%, list=15%, signal=40%						KEGG_GLYCOSPHINGOLIPID_BIOSYNTHESIS_GANGLIO_SERIES	KEGG_GLYCOSPHINGOLIPID_BIOSYNTHESIS_GANGLIO_SERIES		15	-0.347231	-0.92791	0.551308	0.816316	1	912	tags=20%, list=5%, signal=21%
KEGG_TYROSINE_METABOLISM	KEGG_TYROSINE_METABOLISM		42	0.273029	1.073	0.324211	0.616308	1	3261	tags=36%, list=17%, signal=43%						KEGG_GNRH_SIGNALING_PATHWAY	KEGG_GNRH_SIGNALING_PATHWAY		101	-0.236684	-0.923216	0.586614	0.810567	1	6250	tags=39%, list=32%, signal=57%
KEGG_O_GLYCAN_BIOSYNTHESIS	KEGG_O_GLYCAN_BIOSYNTHESIS		30	0.355346	1.06493	0.378819	0.619195	1	2614	tags=27%, list=13%, signal=31%						KEGG_MTOR_SIGNALING_PATHWAY	KEGG_MTOR_SIGNALING_PATHWAY		51	-0.265905	-0.913794	0.559118	0.814114	1	5153	tags=35%, list=26%, signal=48%
KEGG_CELL_CYCLE	KEGG_CELL_CYCLE		124	0.335757	1.06333	0.429658	0.610951	1	5144	tags=47%, list=26%, signal=63%						KEGG_NATURAL_KILLER_CELL_MEDIATED_CYTOTOXICITY	KEGG_NATURAL_KILLER_CELL_MEDIATED_CYTOTOXICITY		131	-0.231568	-0.909576	0.551339	0.807092	1	6366	tags=35%, list=33%, signal=52%
KEGG_PROTEIN_EXPORT	KEGG_PROTEIN_EXPORT		23	0.4134	1.05614	0.431818	0.612517	1	5738	tags=57%, list=29%, signal=80%						KEGG_RENAL_CELL_CARCINOMA	KEGG_RENAL_CELL_CARCINOMA		70	-0.24032	-0.902444	0.570866	0.806424	1	6000	tags=39%, list=31%, signal=56%
KEGG_ALPHA_LINOLENIC_ACID_METABOLISM	KEGG_ALPHA_LINOLENIC_ACID_METABOLISM		19	0.351964	1.05096	0.417671	0.610463	1	4755	tags=47%, list=24%, signal=63%						KEGG_OOCYTE_MEIOSIS	KEGG_OOCYTE_MEIOSIS		112	-0.237131	-0.899071	0.584521	0.798771	1	4501	tags=27%, list=23%, signal=35%
KEGG_CYSTEINE_AND_METHIONINE_METABOLISM	KEGG_CYSTEINE_AND_METHIONINE_METABOLISM		34	0.302782	1.04678	0.410019	0.607309	1	1634	tags=18%, list=8%, signal=19%						KEGG_PRIMARY_BILE_ACID_BIOSYNTHESIS	KEGG_PRIMARY_BILE_ACID_BIOSYNTHESIS		16	-0.312645	-0.897281	0.578093	0.788825	1	2213	tags=25%, list=11%, signal=28%
KEGG_P53_SIGNALING_PATHWAY	KEGG_P53_SIGNALING_PATHWAY		68	0.311892	1.04264	0.416667	0.604048	1	4657	tags=41%, list=24%, signal=54%						KEGG_TYPE_II_DIABETES_MELLITUS	KEGG_TYPE_II_DIABETES_MELLITUS		47	-0.255229	-0.877128	0.647917	0.810206	1	7611	tags=57%, list=39%, signal=94%
KEGG_BETA_ALANINE_METABOLISM	KEGG_BETA_ALANINE_METABOLISM		22	0.344366	1.01913	0.3875	0.632911	1	1372	tags=23%, list=7%, signal=24%						KEGG_APOPTOSIS	KEGG_APOPTOSIS		86	-0.215398	-0.875887	0.621053	0.79946	1	3188	tags=20%, list=16%, signal=24%
KEGG_TRYPTOPHAN_METABOLISM	KEGG_TRYPTOPHAN_METABOLISM		39	0.281722	1.00218	0.468208	0.651481	1	3948	tags=36%, list=20%, signal=45%						KEGG_GLYCOSAMINOGLYCAN_BIOSYNTHESIS_HEPARAN_SULFATE	KEGG_GLYCOSAMINOGLYCAN_BIOSYNTHESIS_HEPARAN_SULFATE		26	-0.312271	-0.866457	0.623457	0.802948	1	4957	tags=42%, list=25%, signal=57%
KEGG_ONE_CARBON_POOL_BY_FOLATE	KEGG_ONE_CARBON_POOL_BY_FOLATE		17	0.390181	0.986856	0.488235	0.6657	1	4811	tags=59%, list=25%, signal=78%						KEGG_TOLL_LIKE_RECEPTOR_SIGNALING_PATHWAY	KEGG_TOLL_LIKE_RECEPTOR_SIGNALING_PATHWAY		101	-0.217121	-0.862822	0.626582	0.796606	1	5291	tags=28%, list=27%, signal=38%
KEGG_LYSINE_DEGRADATION	KEGG_LYSINE_DEGRADATION		44	0.306389	0.955829	0.509128	0.70771	1	4663	tags=39%, list=24%, signal=51%						KEGG_PROSTATE_CANCER	KEGG_PROSTATE_CANCER		89	-0.208806	-0.820079	0.72314	0.857643	1	5423	tags=31%, list=28%, signal=43%
KEGG_RENIN_ANGIOTENSIN_SYSTEM	KEGG_RENIN_ANGIOTENSIN_SYSTEM		17	0.332121	0.945978	0.496868	0.71335	1	2688	tags=29%, list=14%, signal=34%						KEGG_COLORECTAL_CANCER	KEGG_COLORECTAL_CANCER		62	-0.223005	-0.813939	0.678723	0.855025	1	5171	tags=29%, list=27%, signal=39%
KEGG_GLYCOSAMINOGLYCAN_BIOSYNTHESIS_KERATAN_SULFATE	KEGG_GLYCOSAMINOGLYCAN_BIOSYNTHESIS_KERATAN_SULFATE		15	0.3489	0.941012	0.529865	0.711772	1	5335	tags=53%, list=27%, signal=73%						KEGG_FC_EPSILON_RI_SIGNALING_PATHWAY	KEGG_FC_EPSILON_RI_SIGNALING_PATHWAY		79	-0.207988	-0.808541	0.746888	0.851532	1	6139	tags=37%, list=31%, signal=53%
KEGG_GLYCOSAMINOGLYCAN_DEGRADATION	KEGG_GLYCOSAMINOGLYCAN_DEGRADATION		21	0.329495	0.925911	0.569721	0.726907	1	4000	tags=33%, list=21%, signal=42%						KEGG_INSULIN_SIGNALING_PATHWAY	KEGG_INSULIN_SIGNALING_PATHWAY		137	-0.207949	-0.796906	0.719921	0.858483	1	4929	tags=28%, list=25%, signal=38%
KEGG_BLADDER_CANCER	KEGG_BLADDER_CANCER		42	0.281709	0.918291	0.554415	0.728938	1	1981	tags=19%, list=10%, signal=21%						KEGG_ALLOGRAFT_REJECTION	KEGG_ALLOGRAFT_REJECTION		35	-0.311267	-0.794704	0.635776	0.849577	1	7951	tags=57%, list=41%, signal=96%
KEGG_PYRUVATE_METABOLISM	KEGG_PYRUVATE_METABOLISM		40	0.275435	0.914081	0.546906	0.72531	1	3081	tags=28%, list=16%, signal=33%						KEGG_VEGF_SIGNALING_PATHWAY	KEGG_VEGF_SIGNALING_PATHWAY		76	-0.193011	-0.772858	0.832994	0.872544	1	3385	tags=20%, list=17%, signal=24%
KEGG_SNARE_INTERACTIONS_IN_VESICULAR_TRANSPORT	KEGG_SNARE_INTERACTIONS_IN_VESICULAR_TRANSPORT		38	0.259177	0.909416	0.549515	0.723204	1	4115	tags=37%, list=21%, signal=47%						KEGG_DORSO_VENTRAL_AXIS_FORMATION	KEGG_DORSO_VENTRAL_AXIS_FORMATION		24	-0.234036	-0.761015	0.80396	0.879094	1	6823	tags=46%, list=35%, signal=70%
KEGG_PHENYLALANINE_METABOLISM	KEGG_PHENYLALANINE_METABOLISM		18	0.26543	0.900139	0.661448	0.728915	1	964	tags=17%, list=5%, signal=18%						KEGG_INOSITOL_PHOSPHATE_METABOLISM	KEGG_INOSITOL_PHOSPHATE_METABOLISM		54	-0.215497	-0.750918	0.760081	0.881952	1	4064	tags=26%, list=21%, signal=33%
KEGG_NUCLEOTIDE_EXCISION_REPAIR	KEGG_NUCLEOTIDE_EXCISION_REPAIR		44	0.312103	0.89541	0.55514	0.726578	1	4419	tags=43%, list=23%, signal=56%						KEGG_GLIOMA	KEGG_GLIOMA		65	-0.21212	-0.742431	0.815951	0.882037	1	6557	tags=42%, list=34%, signal=62%
KEGG_ALZHEIMERS_DISEASE	KEGG_ALZHEIMERS_DISEASE		157	0.251847	0.893424	0.567951	0.720195	1	5028	tags=38%, list=26%, signal=51%						KEGG_RIBOSOME	KEGG_RIBOSOME		87	-0.340234	-0.741274	0.698482	0.87203	1	9071	tags=56%, list=47%, signal=105%
KEGG_ABC_TRANSPORTERS	KEGG_ABC_TRANSPORTERS		44	0.274742	0.891589	0.592	0.713856	1	3160	tags=32%, list=16%, signal=38%						KEGG_PANCREATIC_CANCER	KEGG_PANCREATIC_CANCER		70	-0.190866	-0.726405	0.877301	0.882033	1	2313	tags=14%, list=12%, signal=16%
KEGG_HOMOLOGOUS_RECOMBINATION	KEGG_HOMOLOGOUS_RECOMBINATION		28	0.345351	0.889025	0.589494	0.708878	1	5662	tags=54%, list=29%, signal=75%						KEGG_COMPLEMENT_AND_COAGULATION_CASCADES	KEGG_COMPLEMENT_AND_COAGULATION_CASCADES		69	-0.215233	-0.707084	0.841584	0.897467	1	2954	tags=17%, list=15%, signal=20%
KEGG_SPLICEOSOME	KEGG_SPLICEOSOME		126	0.290156	0.847037	0.608696	0.765912	1	6531	tags=52%, list=33%, signal=77%						KEGG_GRAFT_VERSUS_HOST_DISEASE	KEGG_GRAFT_VERSUS_HOST_DISEASE		37	-0.27351	-0.702615	0.730932	0.891553	1	7951	tags=49%, list=41%, signal=82%
KEGG_GLYCINE_SERINE_AND_THREONINE_METABOLISM	KEGG_GLYCINE_SERINE_AND_THREONINE_METABOLISM		31	0.257436	0.84346	0.660455	0.761619	1	4565	tags=45%, list=23%, signal=59%						KEGG_RIG_I_LIKE_RECEPTOR_SIGNALING_PATHWAY	KEGG_RIG_I_LIKE_RECEPTOR_SIGNALING_PATHWAY		70	-0.166616	-0.686824	0.90748	0.899368	1	7792	tags=41%, list=40%, signal=69%
KEGG_EPITHELIAL_CELL_SIGNALING_IN_HELICOBACTER_PYLORI_INFECTION	KEGG_EPITHELIAL_CELL_SIGNALING_IN_HELICOBACTER_PYLORI_INFECTION		68	0.219394	0.842545	0.687251	0.753499	1	2604	tags=22%, list=13%, signal=25%						KEGG_ERBB_SIGNALING_PATHWAY	KEGG_ERBB_SIGNALING_PATHWAY		87	-0.184261	-0.680927	0.888247	0.895428	1	6250	tags=37%, list=32%, signal=54%
KEGG_NITROGEN_METABOLISM	KEGG_NITROGEN_METABOLISM		23	0.262741	0.837568	0.720703	0.752257	1	2878	tags=26%, list=15%, signal=31%						KEGG_TYPE_I_DIABETES_MELLITUS	KEGG_TYPE_I_DIABETES_MELLITUS		41	-0.223008	-0.634704	0.805556	0.934249	1	7951	tags=49%, list=41%, signal=82%
KEGG_RIBOFLAVIN_METABOLISM	KEGG_RIBOFLAVIN_METABOLISM		16	0.262642	0.832584	0.733467	0.750376	1	4781	tags=56%, list=25%, signal=74%						KEGG_CHRONIC_MYELOID_LEUKEMIA	KEGG_CHRONIC_MYELOID_LEUKEMIA		73	-0.169049	-0.603856	0.955285	0.950517	1	6147	tags=34%, list=32%, signal=50%
KEGG_ALDOSTERONE_REGULATED_SODIUM_REABSORPTION	KEGG_ALDOSTERONE_REGULATED_SODIUM_REABSORPTION		42	0.227146	0.826021	0.716243	0.750807	1	2060	tags=19%, list=11%, signal=21%						KEGG_ANTIGEN_PROCESSING_AND_PRESENTATION	KEGG_ANTIGEN_PROCESSING_AND_PRESENTATION		80	-0.154725	-0.488565	0.944215	1	1	7727	tags=41%, list=40%, signal=68%
KEGG_PATHOGENIC_ESCHERICHIA_COLI_INFECTION	KEGG_PATHOGENIC_ESCHERICHIA_COLI_INFECTION		55	0.214654	0.795101	0.776923	0.787522	1	2508	tags=22%, list=13%, signal=25%						KEGG_CYTOSOLIC_DNA_SENSING_PATHWAY	KEGG_CYTOSOLIC_DNA_SENSING_PATHWAY		53	-0.126071	-0.47822	0.991718	0.99243	1	3502	tags=13%, list=18%, signal=16%
KEGG_FC_GAMMA_R_MEDIATED_PHAGOCYTOSIS	KEGG_FC_GAMMA_R_MEDIATED_PHAGOCYTOSIS		95	0.21365	0.774088	0.757634	0.810244	1	2263	tags=19%, list=12%, signal=21%						KEGG_BASAL_TRANSCRIPTION_FACTORS	KEGG_BASAL_TRANSCRIPTION_FACTORS		35	-0.148242	-0.473511	0.981211	0.981722	1	906	tags=6%, list=5%, signal=6%
KEGG_HUNTINGTONS_DISEASE	KEGG_HUNTINGTONS_DISEASE		171	0.211796	0.769811	0.688	0.806865	1	5144	tags=33%, list=26%, signal=45%
KEGG_NICOTINATE_AND_NICOTINAMIDE_METABOLISM	KEGG_NICOTINATE_AND_NICOTINAMIDE_METABOLISM		24	0.209583	0.720829	0.869848	0.86491	1	1909	tags=17%, list=10%, signal=18%
KEGG_ENDOMETRIAL_CANCER	KEGG_ENDOMETRIAL_CANCER		52	0.188754	0.659345	0.891732	0.9319	1	1479	tags=13%, list=8%, signal=15%
KEGG_ACUTE_MYELOID_LEUKEMIA	KEGG_ACUTE_MYELOID_LEUKEMIA		57	0.182054	0.636339	0.891519	0.946265	1	456	tags=9%, list=2%, signal=9%
KEGG_NON_SMALL_CELL_LUNG_CANCER	KEGG_NON_SMALL_CELL_LUNG_CANCER		54	0.177219	0.620744	0.956693	0.951128	1	5779	tags=43%, list=30%, signal=60%
KEGG_OXIDATIVE_PHOSPHORYLATION	KEGG_OXIDATIVE_PHOSPHORYLATION		116	0.224713	0.617769	0.798742	0.94308	1	5770	tags=39%, list=30%, signal=55%
KEGG_RNA_DEGRADATION	KEGG_RNA_DEGRADATION		57	0.199949	0.599191	0.859048	0.948752	1	4909	tags=35%, list=25%, signal=47%
KEGG_RNA_POLYMERASE	KEGG_RNA_POLYMERASE		29	0.199857	0.583934	0.896887	0.949682	1	5588	tags=38%, list=29%, signal=53%
KEGG_UBIQUITIN_MEDIATED_PROTEOLYSIS	KEGG_UBIQUITIN_MEDIATED_PROTEOLYSIS		133	0.146691	0.549396	0.973333	0.960624	1	4154	tags=23%, list=21%, signal=28%
KEGG_PARKINSONS_DISEASE	KEGG_PARKINSONS_DISEASE		113	0.170647	0.510844	0.869388	0.968686	1	5120	tags=34%, list=26%, signal=45%

## Sheet: SRSF5
HIGH															LOW
NAME	GS<br> follow link to MSigDB	GS DETAILS	SIZE	ES	NES	NOM p-val	FDR q-val	FWER p-val	RANK AT MAX	LEADING EDGE					NAME	GS<br> follow link to MSigDB	GS DETAILS	SIZE	ES	NES	NOM p-val	FDR q-val	FWER p-val	RANK AT MAX	LEADING EDGE
KEGG_PHOSPHATIDYLINOSITOL_SIGNALING_SYSTEM	KEGG_PHOSPHATIDYLINOSITOL_SIGNALING_SYSTEM	Details ...	76	0.466048	1.58063	0.0363985	1	0.763	4532	tags=47%, list=23%, signal=61%					KEGG_DRUG_METABOLISM_OTHER_ENZYMES	KEGG_DRUG_METABOLISM_OTHER_ENZYMES	Details ...	51	-0.632544	-1.82268	0	0.407896	0.237	4344	tags=63%, list=22%, signal=81%
KEGG_ENDOMETRIAL_CANCER	KEGG_ENDOMETRIAL_CANCER	Details ...	52	0.434124	1.48272	0.0718447	1	0.894	4431	tags=42%, list=23%, signal=55%					KEGG_PORPHYRIN_AND_CHLOROPHYLL_METABOLISM	KEGG_PORPHYRIN_AND_CHLOROPHYLL_METABOLISM	Details ...	40	-0.625595	-1.75663	0.0100402	0.379612	0.349	3992	tags=60%, list=20%, signal=75%
KEGG_UBIQUITIN_MEDIATED_PROTEOLYSIS	KEGG_UBIQUITIN_MEDIATED_PROTEOLYSIS	Details ...	133	0.435576	1.48266	0.0983936	1	0.894	5753	tags=47%, list=29%, signal=66%					KEGG_PENTOSE_PHOSPHATE_PATHWAY	KEGG_PENTOSE_PHOSPHATE_PATHWAY	Details ...	27	-0.571867	-1.69522	0.00397614	0.427788	0.485	4287	tags=56%, list=22%, signal=71%
KEGG_T_CELL_RECEPTOR_SIGNALING_PATHWAY	KEGG_T_CELL_RECEPTOR_SIGNALING_PATHWAY	Details ...	108	0.437584	1.46572	0.0984556	1	0.916	5313	tags=47%, list=27%, signal=65%					KEGG_PENTOSE_AND_GLUCURONATE_INTERCONVERSIONS	KEGG_PENTOSE_AND_GLUCURONATE_INTERCONVERSIONS	Details ...	28	-0.652541	-1.59566	0.0448065	0.684028	0.715	4876	tags=75%, list=25%, signal=100%
KEGG_WNT_SIGNALING_PATHWAY	KEGG_WNT_SIGNALING_PATHWAY	Details ...	150	0.374545	1.46374	0.0451866	1	0.917	6055	tags=43%, list=31%, signal=62%					KEGG_GLUTATHIONE_METABOLISM	KEGG_GLUTATHIONE_METABOLISM	Details ...	47	-0.480239	-1.55915	0.029724	0.690621	0.792	3119	tags=43%, list=16%, signal=51%
KEGG_LONG_TERM_POTENTIATION	KEGG_LONG_TERM_POTENTIATION	Details ...	70	0.38985	1.40056	0.0856031	1	0.961	4965	tags=44%, list=25%, signal=59%					KEGG_ARGININE_AND_PROLINE_METABOLISM	KEGG_ARGININE_AND_PROLINE_METABOLISM	Details ...	54	-0.424789	-1.50742	0.0539419	0.779754	0.858	3606	tags=37%, list=18%, signal=45%
KEGG_VASCULAR_SMOOTH_MUSCLE_CONTRACTION	KEGG_VASCULAR_SMOOTH_MUSCLE_CONTRACTION	Details ...	115	0.389182	1.39022	0.140873	1	0.967	6023	tags=50%, list=31%, signal=71%					KEGG_RETINOL_METABOLISM	KEGG_RETINOL_METABOLISM	Details ...	64	-0.544449	-1.50442	0.0940695	0.681619	0.861	5745	tags=70%, list=29%, signal=99%
KEGG_COLORECTAL_CANCER	KEGG_COLORECTAL_CANCER	Details ...	62	0.39074	1.38401	0.135922	1	0.97	6238	tags=50%, list=32%, signal=73%					KEGG_GLYCOLYSIS_GLUCONEOGENESIS	KEGG_GLYCOLYSIS_GLUCONEOGENESIS	Details ...	61	-0.417788	-1.47019	0.0384615	0.718478	0.903	4036	tags=46%, list=21%, signal=58%
KEGG_B_CELL_RECEPTOR_SIGNALING_PATHWAY	KEGG_B_CELL_RECEPTOR_SIGNALING_PATHWAY	Details ...	75	0.451462	1.37829	0.148728	1	0.971	5426	tags=52%, list=28%, signal=72%					KEGG_METABOLISM_OF_XENOBIOTICS_BY_CYTOCHROME_P450	KEGG_METABOLISM_OF_XENOBIOTICS_BY_CYTOCHROME_P450	Details ...	68	-0.515873	-1.45403	0.12549	0.692537	0.92	5504	tags=71%, list=28%, signal=98%
KEGG_MTOR_SIGNALING_PATHWAY	KEGG_MTOR_SIGNALING_PATHWAY	Details ...	51	0.400715	1.37209	0.130597	1	0.976	4431	tags=39%, list=23%, signal=51%					KEGG_MATURITY_ONSET_DIABETES_OF_THE_YOUNG	KEGG_MATURITY_ONSET_DIABETES_OF_THE_YOUNG	Details ...	25	-0.540431	-1.42485	0.117021	0.720486	0.948	6079	tags=56%, list=31%, signal=81%
KEGG_LEUKOCYTE_TRANSENDOTHELIAL_MIGRATION	KEGG_LEUKOCYTE_TRANSENDOTHELIAL_MIGRATION	Details ...	115	0.339787	1.34602	0.129771	1	0.985	5159	tags=37%, list=26%, signal=49%					KEGG_ASCORBATE_AND_ALDARATE_METABOLISM	KEGG_ASCORBATE_AND_ALDARATE_METABOLISM	Details ...	25	-0.603193	-1.39181	0.107071	0.769021	0.964	3992	tags=60%, list=20%, signal=75%
KEGG_FC_EPSILON_RI_SIGNALING_PATHWAY	KEGG_FC_EPSILON_RI_SIGNALING_PATHWAY	Details ...	79	0.351666	1.3387	0.124506	1	0.987	5849	tags=43%, list=30%, signal=61%					KEGG_STEROID_HORMONE_BIOSYNTHESIS	KEGG_STEROID_HORMONE_BIOSYNTHESIS	Details ...	55	-0.463223	-1.35072	0.132505	0.843352	0.975	4904	tags=56%, list=25%, signal=75%
KEGG_INSULIN_SIGNALING_PATHWAY	KEGG_INSULIN_SIGNALING_PATHWAY	Details ...	137	0.340591	1.32292	0.127413	1	0.988	4431	tags=34%, list=23%, signal=43%					KEGG_FRUCTOSE_AND_MANNOSE_METABOLISM	KEGG_FRUCTOSE_AND_MANNOSE_METABOLISM	Details ...	34	-0.423869	-1.33605	0.161638	0.823855	0.978	3456	tags=35%, list=18%, signal=43%
KEGG_FC_GAMMA_R_MEDIATED_PHAGOCYTOSIS	KEGG_FC_GAMMA_R_MEDIATED_PHAGOCYTOSIS	Details ...	95	0.370517	1.31447	0.171937	1	0.989	5849	tags=44%, list=30%, signal=63%					KEGG_OLFACTORY_TRANSDUCTION	KEGG_OLFACTORY_TRANSDUCTION	Details ...	371	-0.582228	-1.27304	0.432781	0.976528	0.992	5130	tags=73%, list=26%, signal=98%
KEGG_ERBB_SIGNALING_PATHWAY	KEGG_ERBB_SIGNALING_PATHWAY	Details ...	87	0.365099	1.30887	0.174757	1	0.991	4738	tags=38%, list=24%, signal=50%					KEGG_GALACTOSE_METABOLISM	KEGG_GALACTOSE_METABOLISM	Details ...	26	-0.407397	-1.27296	0.170341	0.912115	0.992	4929	tags=58%, list=25%, signal=77%
KEGG_NEUROTROPHIN_SIGNALING_PATHWAY	KEGG_NEUROTROPHIN_SIGNALING_PATHWAY	Details ...	125	0.355979	1.28886	0.180039	1	0.994	5970	tags=43%, list=31%, signal=62%					KEGG_DRUG_METABOLISM_CYTOCHROME_P450	KEGG_DRUG_METABOLISM_CYTOCHROME_P450	Details ...	70	-0.442959	-1.26702	0.235412	0.87328	0.992	5504	tags=61%, list=28%, signal=85%
KEGG_SNARE_INTERACTIONS_IN_VESICULAR_TRANSPORT	KEGG_SNARE_INTERACTIONS_IN_VESICULAR_TRANSPORT	Details ...	38	0.382501	1.28608	0.208835	1	0.995	3209	tags=29%, list=16%, signal=35%					KEGG_STEROID_BIOSYNTHESIS	KEGG_STEROID_BIOSYNTHESIS	Details ...	17	-0.543121	-1.25555	0.266667	0.857264	0.993	4945	tags=53%, list=25%, signal=71%
KEGG_PRIMARY_IMMUNODEFICIENCY	KEGG_PRIMARY_IMMUNODEFICIENCY	Details ...	35	0.531719	1.28315	0.246183	1	0.996	6934	tags=69%, list=36%, signal=106%					KEGG_STARCH_AND_SUCROSE_METABOLISM	KEGG_STARCH_AND_SUCROSE_METABOLISM	Details ...	51	-0.38807	-1.23318	0.216667	0.875319	0.995	4876	tags=55%, list=25%, signal=73%
KEGG_GLIOMA	KEGG_GLIOMA	Details ...	65	0.369354	1.28045	0.184825	1	0.996	5970	tags=46%, list=31%, signal=66%					KEGG_GLYCINE_SERINE_AND_THREONINE_METABOLISM	KEGG_GLYCINE_SERINE_AND_THREONINE_METABOLISM	Details ...	31	-0.374591	-1.17898	0.273834	0.993146	0.998	5326	tags=61%, list=27%, signal=84%
KEGG_CALCIUM_SIGNALING_PATHWAY	KEGG_CALCIUM_SIGNALING_PATHWAY	Details ...	177	0.339897	1.27852	0.185484	0.993762	0.996	6585	tags=47%, list=34%, signal=71%					KEGG_ALANINE_ASPARTATE_AND_GLUTAMATE_METABOLISM	KEGG_ALANINE_ASPARTATE_AND_GLUTAMATE_METABOLISM	Details ...	30	-0.378031	-1.17035	0.278132	0.97043	0.998	5602	tags=57%, list=29%, signal=79%
KEGG_JAK_STAT_SIGNALING_PATHWAY	KEGG_JAK_STAT_SIGNALING_PATHWAY		155	0.342468	1.27178	0.18254	0.970858	0.996	5369	tags=36%, list=28%, signal=49%					KEGG_OXIDATIVE_PHOSPHORYLATION	KEGG_OXIDATIVE_PHOSPHORYLATION		116	-0.36635	-1.06604	0.401174	1	0.999	5025	tags=39%, list=26%, signal=52%
KEGG_NOD_LIKE_RECEPTOR_SIGNALING_PATHWAY	KEGG_NOD_LIKE_RECEPTOR_SIGNALING_PATHWAY		62	0.385957	1.26882	0.20078	0.936414	0.996	5636	tags=40%, list=29%, signal=57%					KEGG_GLYOXYLATE_AND_DICARBOXYLATE_METABOLISM	KEGG_GLYOXYLATE_AND_DICARBOXYLATE_METABOLISM		16	-0.40699	-1.05104	0.412698	1	0.999	3964	tags=31%, list=20%, signal=39%
KEGG_RENAL_CELL_CARCINOMA	KEGG_RENAL_CELL_CARCINOMA		70	0.367983	1.26674	0.207364	0.902088	0.996	4431	tags=34%, list=23%, signal=44%					KEGG_CARDIAC_MUSCLE_CONTRACTION	KEGG_CARDIAC_MUSCLE_CONTRACTION		73	-0.307876	-1.04752	0.390688	1	0.999	3582	tags=34%, list=18%, signal=42%
KEGG_CHEMOKINE_SIGNALING_PATHWAY	KEGG_CHEMOKINE_SIGNALING_PATHWAY		187	0.327783	1.26323	0.218631	0.875741	0.996	5919	tags=39%, list=30%, signal=55%					KEGG_PROTEASOME	KEGG_PROTEASOME		44	-0.414578	-1.03421	0.462998	1	0.999	5244	tags=50%, list=27%, signal=68%
KEGG_MAPK_SIGNALING_PATHWAY	KEGG_MAPK_SIGNALING_PATHWAY		267	0.303295	1.26159	0.176245	0.845987	0.996	5403	tags=32%, list=28%, signal=44%					KEGG_ARACHIDONIC_ACID_METABOLISM	KEGG_ARACHIDONIC_ACID_METABOLISM		57	-0.299183	-1.03387	0.43038	1	0.999	3610	tags=35%, list=19%, signal=43%
KEGG_NON_SMALL_CELL_LUNG_CANCER	KEGG_NON_SMALL_CELL_LUNG_CANCER		54	0.368149	1.25341	0.225296	0.837628	0.996	5167	tags=41%, list=26%, signal=55%					KEGG_PROXIMAL_TUBULE_BICARBONATE_RECLAMATION	KEGG_PROXIMAL_TUBULE_BICARBONATE_RECLAMATION		23	-0.330812	-1.01706	0.433538	1	1	5602	tags=61%, list=29%, signal=85%
KEGG_PROSTATE_CANCER	KEGG_PROSTATE_CANCER		89	0.335496	1.25224	0.208015	0.809654	0.996	5990	tags=42%, list=31%, signal=60%					KEGG_PARKINSONS_DISEASE	KEGG_PARKINSONS_DISEASE		113	-0.308191	-0.934055	0.506876	1	1	5068	tags=41%, list=26%, signal=55%
KEGG_GNRH_SIGNALING_PATHWAY	KEGG_GNRH_SIGNALING_PATHWAY		101	0.325762	1.25171	0.194231	0.782091	0.996	6023	tags=39%, list=31%, signal=56%					KEGG_LINOLEIC_ACID_METABOLISM	KEGG_LINOLEIC_ACID_METABOLISM		29	-0.303896	-0.900322	0.594912	1	1	5504	tags=55%, list=28%, signal=77%
KEGG_ADHERENS_JUNCTION	KEGG_ADHERENS_JUNCTION		73	0.345471	1.24138	0.206628	0.782056	0.996	6068	tags=47%, list=31%, signal=67%					KEGG_BETA_ALANINE_METABOLISM	KEGG_BETA_ALANINE_METABOLISM		22	-0.283364	-0.886745	0.622081	1	1	3659	tags=27%, list=19%, signal=34%
KEGG_BASAL_CELL_CARCINOMA	KEGG_BASAL_CELL_CARCINOMA		55	0.349195	1.23576	0.190855	0.770313	0.997	6055	tags=42%, list=31%, signal=60%					KEGG_BUTANOATE_METABOLISM	KEGG_BUTANOATE_METABOLISM		34	-0.277098	-0.884828	0.580448	1	1	3839	tags=29%, list=20%, signal=37%
KEGG_MELANOGENESIS	KEGG_MELANOGENESIS		101	0.315095	1.22755	0.189555	0.768002	0.997	6585	tags=45%, list=34%, signal=67%					KEGG_COMPLEMENT_AND_COAGULATION_CASCADES	KEGG_COMPLEMENT_AND_COAGULATION_CASCADES		69	-0.274135	-0.883781	0.617409	1	1	4021	tags=36%, list=21%, signal=45%
KEGG_INOSITOL_PHOSPHATE_METABOLISM	KEGG_INOSITOL_PHOSPHATE_METABOLISM		54	0.363706	1.21697	0.263158	0.770519	0.997	4532	tags=39%, list=23%, signal=51%					KEGG_PHENYLALANINE_METABOLISM	KEGG_PHENYLALANINE_METABOLISM		18	-0.25816	-0.883381	0.667331	1	1	375	tags=11%, list=2%, signal=11%
KEGG_SMALL_CELL_LUNG_CANCER	KEGG_SMALL_CELL_LUNG_CANCER		84	0.349061	1.21629	0.231518	0.748795	0.998	5261	tags=39%, list=27%, signal=54%					KEGG_OTHER_GLYCAN_DEGRADATION	KEGG_OTHER_GLYCAN_DEGRADATION		16	-0.342079	-0.868019	0.579798	1	1	1357	tags=25%, list=7%, signal=27%
KEGG_TGF_BETA_SIGNALING_PATHWAY	KEGG_TGF_BETA_SIGNALING_PATHWAY		85	0.331252	1.21203	0.246602	0.736706	0.998	3505	tags=25%, list=18%, signal=30%					KEGG_AMINO_SUGAR_AND_NUCLEOTIDE_SUGAR_METABOLISM	KEGG_AMINO_SUGAR_AND_NUCLEOTIDE_SUGAR_METABOLISM		44	-0.278119	-0.867377	0.626068	1	1	5022	tags=36%, list=26%, signal=49%
KEGG_APOPTOSIS	KEGG_APOPTOSIS		86	0.330347	1.21182	0.226531	0.715952	0.998	5261	tags=34%, list=27%, signal=46%					KEGG_PRION_DISEASES	KEGG_PRION_DISEASES		35	-0.261654	-0.861075	0.682186	1	1	4865	tags=49%, list=25%, signal=65%
KEGG_REGULATION_OF_ACTIN_CYTOSKELETON	KEGG_REGULATION_OF_ACTIN_CYTOSKELETON		212	0.283366	1.21027	0.21611	0.699876	0.998	5190	tags=34%, list=27%, signal=46%					KEGG_GLYCOSAMINOGLYCAN_DEGRADATION	KEGG_GLYCOSAMINOGLYCAN_DEGRADATION		21	-0.308854	-0.857398	0.608163	1	1	1802	tags=24%, list=9%, signal=26%
KEGG_PATHWAYS_IN_CANCER	KEGG_PATHWAYS_IN_CANCER		325	0.28878	1.20207	0.227006	0.700735	0.999	6092	tags=37%, list=31%, signal=52%					KEGG_BLADDER_CANCER	KEGG_BLADDER_CANCER		42	-0.261829	-0.831697	0.665984	1	1	2412	tags=24%, list=12%, signal=27%
KEGG_VEGF_SIGNALING_PATHWAY	KEGG_VEGF_SIGNALING_PATHWAY		76	0.302618	1.18185	0.246	0.732202	0.999	4943	tags=32%, list=25%, signal=42%					KEGG_CITRATE_CYCLE_TCA_CYCLE	KEGG_CITRATE_CYCLE_TCA_CYCLE		30	-0.307604	-0.824721	0.642127	1	1	4196	tags=30%, list=22%, signal=38%
KEGG_RNA_DEGRADATION	KEGG_RNA_DEGRADATION		57	0.406896	1.16901	0.35102	0.744602	0.999	5192	tags=42%, list=27%, signal=57%					KEGG_HUNTINGTONS_DISEASE	KEGG_HUNTINGTONS_DISEASE		171	-0.223219	-0.814453	0.622754	1	1	4937	tags=38%, list=25%, signal=50%
KEGG_P53_SIGNALING_PATHWAY	KEGG_P53_SIGNALING_PATHWAY		68	0.339779	1.15125	0.295858	0.767873	0.999	5454	tags=32%, list=28%, signal=45%					KEGG_LYSOSOME	KEGG_LYSOSOME		121	-0.248048	-0.810836	0.620123	1	1	2517	tags=21%, list=13%, signal=25%
KEGG_NUCLEOTIDE_EXCISION_REPAIR	KEGG_NUCLEOTIDE_EXCISION_REPAIR		44	0.389472	1.13987	0.35124	0.775292	0.999	6017	tags=43%, list=31%, signal=62%					KEGG_PANTOTHENATE_AND_COA_BIOSYNTHESIS	KEGG_PANTOTHENATE_AND_COA_BIOSYNTHESIS		16	-0.275997	-0.805191	0.714859	1	1	4492	tags=38%, list=23%, signal=49%
KEGG_ACUTE_MYELOID_LEUKEMIA	KEGG_ACUTE_MYELOID_LEUKEMIA		57	0.333499	1.13507	0.337687	0.767601	0.999	4431	tags=33%, list=23%, signal=43%					KEGG_CYSTEINE_AND_METHIONINE_METABOLISM	KEGG_CYSTEINE_AND_METHIONINE_METABOLISM		34	-0.235859	-0.757855	0.801242	1	1	1114	tags=18%, list=6%, signal=19%
KEGG_GAP_JUNCTION	KEGG_GAP_JUNCTION		89	0.302637	1.12972	0.301775	0.761064	0.999	3933	tags=26%, list=20%, signal=32%					KEGG_GLYCEROLIPID_METABOLISM	KEGG_GLYCEROLIPID_METABOLISM		48	-0.208601	-0.757828	0.815217	1	1	3989	tags=31%, list=20%, signal=39%
KEGG_RIG_I_LIKE_RECEPTOR_SIGNALING_PATHWAY	KEGG_RIG_I_LIKE_RECEPTOR_SIGNALING_PATHWAY		70	0.299023	1.12914	0.294239	0.745021	0.999	5235	tags=31%, list=27%, signal=43%					KEGG_SPHINGOLIPID_METABOLISM	KEGG_SPHINGOLIPID_METABOLISM		39	-0.222825	-0.75579	0.778723	1	1	1357	tags=15%, list=7%, signal=17%
KEGG_HEMATOPOIETIC_CELL_LINEAGE	KEGG_HEMATOPOIETIC_CELL_LINEAGE		84	0.363737	1.12551	0.349421	0.735997	0.999	6963	tags=50%, list=36%, signal=77%					KEGG_RIBOFLAVIN_METABOLISM	KEGG_RIBOFLAVIN_METABOLISM		16	-0.257696	-0.745299	0.8119	1	1	3206	tags=31%, list=16%, signal=37%
KEGG_SPLICEOSOME	KEGG_SPLICEOSOME		126	0.399977	1.12084	0.400406	0.730462	1	4716	tags=34%, list=24%, signal=45%					KEGG_ALZHEIMERS_DISEASE	KEGG_ALZHEIMERS_DISEASE		157	-0.195471	-0.733763	0.735521	1	1	5089	tags=35%, list=26%, signal=47%
KEGG_OOCYTE_MEIOSIS	KEGG_OOCYTE_MEIOSIS		112	0.30396	1.1175	0.335306	0.721745	1	6023	tags=37%, list=31%, signal=53%					KEGG_EPITHELIAL_CELL_SIGNALING_IN_HELICOBACTER_PYLORI_INFECTION	KEGG_EPITHELIAL_CELL_SIGNALING_IN_HELICOBACTER_PYLORI_INFECTION		68	-0.187479	-0.718518	0.86	1	1	2332	tags=16%, list=12%, signal=18%
KEGG_MELANOMA	KEGG_MELANOMA		71	0.283577	1.10792	0.3	0.725506	1	4431	tags=31%, list=23%, signal=40%					KEGG_GLYCOSAMINOGLYCAN_BIOSYNTHESIS_KERATAN_SULFATE	KEGG_GLYCOSAMINOGLYCAN_BIOSYNTHESIS_KERATAN_SULFATE		15	-0.269954	-0.713971	0.781065	1	1	22	tags=7%, list=0%, signal=7%
KEGG_FOCAL_ADHESION	KEGG_FOCAL_ADHESION		199	0.30243	1.08454	0.376699	0.759064	1	7370	tags=50%, list=38%, signal=79%					KEGG_VIBRIO_CHOLERAE_INFECTION	KEGG_VIBRIO_CHOLERAE_INFECTION		54	-0.191257	-0.711672	0.869388	1	1	2332	tags=19%, list=12%, signal=21%
KEGG_CELL_ADHESION_MOLECULES_CAMS	KEGG_CELL_ADHESION_MOLECULES_CAMS		130	0.300943	1.07825	0.349901	0.757049	1	6639	tags=45%, list=34%, signal=67%					KEGG_PYRUVATE_METABOLISM	KEGG_PYRUVATE_METABOLISM		40	-0.204868	-0.698237	0.876797	1	1	3156	tags=25%, list=16%, signal=30%
KEGG_PROGESTERONE_MEDIATED_OOCYTE_MATURATION	KEGG_PROGESTERONE_MEDIATED_OOCYTE_MATURATION		85	0.286031	1.06196	0.405138	0.776184	1	6023	tags=35%, list=31%, signal=51%					KEGG_PYRIMIDINE_METABOLISM	KEGG_PYRIMIDINE_METABOLISM		98	-0.201785	-0.686863	0.785575	1	1	4276	tags=26%, list=22%, signal=33%
KEGG_BASAL_TRANSCRIPTION_FACTORS	KEGG_BASAL_TRANSCRIPTION_FACTORS		35	0.346581	1.06071	0.373308	0.764121	1	4818	tags=31%, list=25%, signal=42%					KEGG_TYROSINE_METABOLISM	KEGG_TYROSINE_METABOLISM		42	-0.173727	-0.680997	0.972332	1	1	5203	tags=38%, list=27%, signal=52%
KEGG_PROPANOATE_METABOLISM	KEGG_PROPANOATE_METABOLISM		32	0.365632	1.06069	0.428571	0.749819	1	7474	tags=50%, list=38%, signal=81%					KEGG_PPAR_SIGNALING_PATHWAY	KEGG_PPAR_SIGNALING_PATHWAY		69	-0.184706	-0.667556	0.933476	1	1	4184	tags=29%, list=21%, signal=37%
KEGG_VASOPRESSIN_REGULATED_WATER_REABSORPTION	KEGG_VASOPRESSIN_REGULATED_WATER_REABSORPTION		44	0.302667	1.05325	0.387914	0.751028	1	5289	tags=32%, list=27%, signal=44%					KEGG_N_GLYCAN_BIOSYNTHESIS	KEGG_N_GLYCAN_BIOSYNTHESIS		46	-0.221033	-0.666743	0.802444	1	1	3408	tags=28%, list=17%, signal=34%
KEGG_TOLL_LIKE_RECEPTOR_SIGNALING_PATHWAY	KEGG_TOLL_LIKE_RECEPTOR_SIGNALING_PATHWAY		101	0.274523	1.03815	0.406746	0.768068	1	4681	tags=28%, list=24%, signal=36%					KEGG_RNA_POLYMERASE	KEGG_RNA_POLYMERASE		29	-0.222393	-0.655445	0.82643	1	1	1996	tags=17%, list=10%, signal=19%
KEGG_ENDOCYTOSIS	KEGG_ENDOCYTOSIS		181	0.256817	1.02644	0.448077	0.777822	1	5862	tags=33%, list=30%, signal=47%					KEGG_PEROXISOME	KEGG_PEROXISOME		78	-0.179595	-0.631806	0.895299	1	1	2494	tags=18%, list=13%, signal=20%
KEGG_DORSO_VENTRAL_AXIS_FORMATION	KEGG_DORSO_VENTRAL_AXIS_FORMATION		24	0.332381	1.02333	0.451056	0.771159	1	3475	tags=25%, list=18%, signal=30%					KEGG_TRYPTOPHAN_METABOLISM	KEGG_TRYPTOPHAN_METABOLISM		39	-0.167215	-0.617756	0.967249	1	1	16251	tags=100%, list=83%, signal=598%
KEGG_CHRONIC_MYELOID_LEUKEMIA	KEGG_CHRONIC_MYELOID_LEUKEMIA		73	0.309805	1.02075	0.460501	0.763273	1	5235	tags=34%, list=27%, signal=47%					KEGG_RENIN_ANGIOTENSIN_SYSTEM	KEGG_RENIN_ANGIOTENSIN_SYSTEM		17	-0.210176	-0.609151	0.938144	1	1	3412	tags=29%, list=17%, signal=36%
KEGG_ABC_TRANSPORTERS	KEGG_ABC_TRANSPORTERS		44	0.306691	1.02064	0.416503	0.750453	1	3509	tags=25%, list=18%, signal=30%					KEGG_ANTIGEN_PROCESSING_AND_PRESENTATION	KEGG_ANTIGEN_PROCESSING_AND_PRESENTATION		80	-0.183182	-0.608384	0.91954	1	1	5249	tags=40%, list=27%, signal=55%
KEGG_INTESTINAL_IMMUNE_NETWORK_FOR_IGA_PRODUCTION	KEGG_INTESTINAL_IMMUNE_NETWORK_FOR_IGA_PRODUCTION		46	0.391269	1.01673	0.466135	0.745146	1	6955	tags=59%, list=36%, signal=91%					KEGG_BIOSYNTHESIS_OF_UNSATURATED_FATTY_ACIDS	KEGG_BIOSYNTHESIS_OF_UNSATURATED_FATTY_ACIDS		22	-0.210257	-0.606412	0.913402	1	1	5398	tags=41%, list=28%, signal=56%
KEGG_NICOTINATE_AND_NICOTINAMIDE_METABOLISM	KEGG_NICOTINATE_AND_NICOTINAMIDE_METABOLISM		24	0.291964	1.00612	0.442085	0.753895	1	6801	tags=42%, list=35%, signal=64%					KEGG_ALPHA_LINOLENIC_ACID_METABOLISM	KEGG_ALPHA_LINOLENIC_ACID_METABOLISM		19	-0.193115	-0.592846	0.982283	1	1	3140	tags=26%, list=16%, signal=31%
KEGG_ALDOSTERONE_REGULATED_SODIUM_REABSORPTION	KEGG_ALDOSTERONE_REGULATED_SODIUM_REABSORPTION		42	0.283824	0.9949	0.445972	0.764009	1	4431	tags=31%, list=23%, signal=40%					KEGG_CYTOSOLIC_DNA_SENSING_PATHWAY	KEGG_CYTOSOLIC_DNA_SENSING_PATHWAY		53	-0.181703	-0.592801	0.938104	1	1	4701	tags=32%, list=24%, signal=42%
KEGG_AXON_GUIDANCE	KEGG_AXON_GUIDANCE		129	0.25328	0.986498	0.439072	0.767575	1	5053	tags=30%, list=26%, signal=41%					KEGG_REGULATION_OF_AUTOPHAGY	KEGG_REGULATION_OF_AUTOPHAGY		34	-0.208992	-0.585976	0.905769	1	1	4701	tags=44%, list=24%, signal=58%
KEGG_ARRHYTHMOGENIC_RIGHT_VENTRICULAR_CARDIOMYOPATHY_ARVC	KEGG_ARRHYTHMOGENIC_RIGHT_VENTRICULAR_CARDIOMYOPATHY_ARVC		74	0.290204	0.981262	0.464286	0.765382	1	6484	tags=43%, list=33%, signal=65%					KEGG_FATTY_ACID_METABOLISM	KEGG_FATTY_ACID_METABOLISM		42	-0.181326	-0.581953	0.92569	1	1	3742	tags=24%, list=19%, signal=29%
KEGG_TYPE_II_DIABETES_MELLITUS	KEGG_TYPE_II_DIABETES_MELLITUS		47	0.285129	0.967847	0.493384	0.779524	1	4431	tags=30%, list=23%, signal=38%					KEGG_GLYCOSPHINGOLIPID_BIOSYNTHESIS_LACTO_AND_NEOLACTO_SERIES	KEGG_GLYCOSPHINGOLIPID_BIOSYNTHESIS_LACTO_AND_NEOLACTO_SERIES		26	-0.170805	-0.552332	0.96701	1	1	6957	tags=50%, list=36%, signal=78%
KEGG_GLYCOSPHINGOLIPID_BIOSYNTHESIS_GANGLIO_SERIES	KEGG_GLYCOSPHINGOLIPID_BIOSYNTHESIS_GANGLIO_SERIES		15	0.361678	0.959295	0.510121	0.78364	1	4928	tags=33%, list=25%, signal=45%					KEGG_GLYCOSAMINOGLYCAN_BIOSYNTHESIS_HEPARAN_SULFATE	KEGG_GLYCOSAMINOGLYCAN_BIOSYNTHESIS_HEPARAN_SULFATE		26	-0.172194	-0.515782	0.973029	1	1	523	tags=8%, list=3%, signal=8%
KEGG_HOMOLOGOUS_RECOMBINATION	KEGG_HOMOLOGOUS_RECOMBINATION		28	0.353367	0.942863	0.509018	0.802223	1	5527	tags=32%, list=28%, signal=45%					KEGG_RIBOSOME	KEGG_RIBOSOME		87	-0.227384	-0.497575	0.85119	1	1	5685	tags=37%, list=29%, signal=52%
KEGG_VIRAL_MYOCARDITIS	KEGG_VIRAL_MYOCARDITIS		68	0.25271	0.915127	0.540918	0.843491	1	6639	tags=40%, list=34%, signal=60%					KEGG_TERPENOID_BACKBONE_BIOSYNTHESIS	KEGG_TERPENOID_BACKBONE_BIOSYNTHESIS		15	-0.194169	-0.468847	0.972056	1	1	184	tags=7%, list=1%, signal=7%
KEGG_GLYCOSAMINOGLYCAN_BIOSYNTHESIS_CHONDROITIN_SULFATE	KEGG_GLYCOSAMINOGLYCAN_BIOSYNTHESIS_CHONDROITIN_SULFATE		22	0.355649	0.913239	0.549808	0.834762	1	6458	tags=55%, list=33%, signal=81%					KEGG_AUTOIMMUNE_THYROID_DISEASE	KEGG_AUTOIMMUNE_THYROID_DISEASE		50	-0.172601	-0.454122	0.959335	1	1	4749	tags=34%, list=24%, signal=45%
KEGG_TASTE_TRANSDUCTION	KEGG_TASTE_TRANSDUCTION		51	0.321027	0.913159	0.538307	0.823028	1	7656	tags=53%, list=39%, signal=87%					KEGG_O_GLYCAN_BIOSYNTHESIS	KEGG_O_GLYCAN_BIOSYNTHESIS		30	-0.144031	-0.434693	0.989083	1	1	16701	tags=100%, list=86%, signal=695%
KEGG_HYPERTROPHIC_CARDIOMYOPATHY_HCM	KEGG_HYPERTROPHIC_CARDIOMYOPATHY_HCM		83	0.26978	0.91	0.565302	0.817473	1	6484	tags=40%, list=33%, signal=59%					KEGG_BASE_EXCISION_REPAIR	KEGG_BASE_EXCISION_REPAIR		33	-0.155795	-0.409463	0.963035	1	1	3864	tags=24%, list=20%, signal=30%
KEGG_MISMATCH_REPAIR	KEGG_MISMATCH_REPAIR		23	0.356352	0.909147	0.542683	0.807457	1	5224	tags=35%, list=27%, signal=47%					KEGG_DNA_REPLICATION	KEGG_DNA_REPLICATION		36	-0.136014	-0.33265	0.984283	0.998126	1	2836	tags=14%, list=15%, signal=16%
KEGG_DILATED_CARDIOMYOPATHY	KEGG_DILATED_CARDIOMYOPATHY		90	0.267059	0.905749	0.591716	0.802456	1	6530	tags=39%, list=33%, signal=58%
KEGG_LYSINE_DEGRADATION	KEGG_LYSINE_DEGRADATION		44	0.290842	0.90448	0.56238	0.794112	1	6231	tags=36%, list=32%, signal=53%
KEGG_NATURAL_KILLER_CELL_MEDIATED_CYTOTOXICITY	KEGG_NATURAL_KILLER_CELL_MEDIATED_CYTOTOXICITY		131	0.238907	0.903704	0.575884	0.784982	1	5849	tags=34%, list=30%, signal=48%
KEGG_HISTIDINE_METABOLISM	KEGG_HISTIDINE_METABOLISM		29	0.261408	0.890669	0.619239	0.796667	1	4533	tags=28%, list=23%, signal=36%
KEGG_ADIPOCYTOKINE_SIGNALING_PATHWAY	KEGG_ADIPOCYTOKINE_SIGNALING_PATHWAY		67	0.248774	0.888023	0.603025	0.790888	1	5377	tags=33%, list=28%, signal=45%
KEGG_LONG_TERM_DEPRESSION	KEGG_LONG_TERM_DEPRESSION		70	0.229444	0.881489	0.655512	0.7914	1	6081	tags=36%, list=31%, signal=52%
KEGG_NOTCH_SIGNALING_PATHWAY	KEGG_NOTCH_SIGNALING_PATHWAY		47	0.268127	0.854768	0.656371	0.826441	1	4392	tags=26%, list=23%, signal=33%
KEGG_HEDGEHOG_SIGNALING_PATHWAY	KEGG_HEDGEHOG_SIGNALING_PATHWAY		56	0.236682	0.854486	0.677043	0.816602	1	5788	tags=34%, list=30%, signal=48%
KEGG_PROTEIN_EXPORT	KEGG_PROTEIN_EXPORT		23	0.327036	0.846668	0.603922	0.820345	1	2503	tags=17%, list=13%, signal=20%
KEGG_PANCREATIC_CANCER	KEGG_PANCREATIC_CANCER		70	0.229314	0.829207	0.697446	0.839674	1	4431	tags=24%, list=23%, signal=31%
KEGG_AMYOTROPHIC_LATERAL_SCLEROSIS_ALS	KEGG_AMYOTROPHIC_LATERAL_SCLEROSIS_ALS		52	0.20738	0.816444	0.753321	0.850389	1	6138	tags=35%, list=31%, signal=50%
KEGG_NITROGEN_METABOLISM	KEGG_NITROGEN_METABOLISM		23	0.26018	0.810147	0.748614	0.850611	1	1326	tags=13%, list=7%, signal=14%
KEGG_GLYCOSYLPHOSPHATIDYLINOSITOL_GPI_ANCHOR_BIOSYNTHESIS	KEGG_GLYCOSYLPHOSPHATIDYLINOSITOL_GPI_ANCHOR_BIOSYNTHESIS		24	0.280458	0.792263	0.674651	0.870243	1	3272	tags=25%, list=17%, signal=30%
KEGG_ECM_RECEPTOR_INTERACTION	KEGG_ECM_RECEPTOR_INTERACTION		83	0.258036	0.788316	0.694444	0.866496	1	8255	tags=58%, list=42%, signal=100%
KEGG_CELL_CYCLE	KEGG_CELL_CYCLE		124	0.241706	0.779876	0.651911	0.869507	1	5569	tags=27%, list=29%, signal=37%
KEGG_ALLOGRAFT_REJECTION	KEGG_ALLOGRAFT_REJECTION		35	0.306603	0.774173	0.659229	0.868596	1	8266	tags=54%, list=42%, signal=94%
KEGG_LEISHMANIA_INFECTION	KEGG_LEISHMANIA_INFECTION		68	0.228522	0.712515	0.751445	0.949841	1	8594	tags=51%, list=44%, signal=92%
KEGG_PURINE_METABOLISM	KEGG_PURINE_METABOLISM		157	0.160368	0.705834	0.891566	0.948085	1	7793	tags=36%, list=40%, signal=60%
KEGG_TIGHT_JUNCTION	KEGG_TIGHT_JUNCTION		131	0.170985	0.696035	0.904277	0.951129	1	5081	tags=24%, list=26%, signal=32%
KEGG_ETHER_LIPID_METABOLISM	KEGG_ETHER_LIPID_METABOLISM		33	0.191696	0.687099	0.934236	0.953245	1	408	tags=6%, list=2%, signal=6%
KEGG_GLYCEROPHOSPHOLIPID_METABOLISM	KEGG_GLYCEROPHOSPHOLIPID_METABOLISM		77	0.169544	0.68205	0.944123	0.949735	1	4342	tags=21%, list=22%, signal=27%
KEGG_VALINE_LEUCINE_AND_ISOLEUCINE_DEGRADATION	KEGG_VALINE_LEUCINE_AND_ISOLEUCINE_DEGRADATION		44	0.229491	0.66752	0.790787	0.957921	1	4580	tags=23%, list=23%, signal=30%
KEGG_THYROID_CANCER	KEGG_THYROID_CANCER		29	0.215459	0.664157	0.839844	0.951731	1	5990	tags=34%, list=31%, signal=50%
KEGG_PATHOGENIC_ESCHERICHIA_COLI_INFECTION	KEGG_PATHOGENIC_ESCHERICHIA_COLI_INFECTION		55	0.179857	0.658722	0.91446	0.948142	1	6487	tags=36%, list=33%, signal=54%
KEGG_ONE_CARBON_POOL_BY_FOLATE	KEGG_ONE_CARBON_POOL_BY_FOLATE		17	0.26411	0.646666	0.820565	0.951382	1	1294	tags=12%, list=7%, signal=13%
KEGG_CYTOKINE_CYTOKINE_RECEPTOR_INTERACTION	KEGG_CYTOKINE_CYTOKINE_RECEPTOR_INTERACTION		262	0.166253	0.62624	0.922929	0.96398	1	7475	tags=35%, list=38%, signal=57%
KEGG_SELENOAMINO_ACID_METABOLISM	KEGG_SELENOAMINO_ACID_METABOLISM		25	0.204781	0.603516	0.938104	0.974855	1	4200	tags=24%, list=22%, signal=31%
KEGG_SYSTEMIC_LUPUS_ERYTHEMATOSUS	KEGG_SYSTEMIC_LUPUS_ERYTHEMATOSUS		55	0.204542	0.599618	0.830645	0.968204	1	6955	tags=40%, list=36%, signal=62%
KEGG_ASTHMA	KEGG_ASTHMA		28	0.244653	0.590499	0.830375	0.965555	1	7145	tags=50%, list=37%, signal=79%
KEGG_AMINOACYL_TRNA_BIOSYNTHESIS	KEGG_AMINOACYL_TRNA_BIOSYNTHESIS		22	0.204486	0.515434	0.903733	1	1	2947	tags=14%, list=15%, signal=16%
KEGG_PRIMARY_BILE_ACID_BIOSYNTHESIS	KEGG_PRIMARY_BILE_ACID_BIOSYNTHESIS		16	0.18447	0.498862	0.990079	0.99943	1	4339	tags=25%, list=22%, signal=32%
KEGG_GRAFT_VERSUS_HOST_DISEASE	KEGG_GRAFT_VERSUS_HOST_DISEASE		37	0.179905	0.470505	0.945344	0.999264	1	8266	tags=43%, list=42%, signal=75%
KEGG_NEUROACTIVE_LIGAND_RECEPTOR_INTERACTION	KEGG_NEUROACTIVE_LIGAND_RECEPTOR_INTERACTION		271	0.123053	0.406799	0.997951	1	1	6978	tags=30%, list=36%, signal=45%
KEGG_TYPE_I_DIABETES_MELLITUS	KEGG_TYPE_I_DIABETES_MELLITUS		41	0.122919	0.339142	1	0.998054	1	7190	tags=32%, list=37%, signal=50%
