# Supplementary material for: Identification of subtype-specific genes signature by WGCNA for prognostic prediction in diffuse type gastric cancer
Source: Aging (Albany NY). 2020 Sep 11;12(17):17418–35. doi: 10.18632/aging.103743 (PMC7521533; doi:10.18632/aging.103743)
Supplement: Supplementary Table 5 [file aging-12-103743-s002..xlsx]

## Sheet: green module
Category	Term	Count	%	PValue	Genes	List Total	Pop Hits	Pop Total	Fold Enrichment	Bonferroni	Benjamini	FDR
KEGG_PATHWAY	hsa04640:Hematopoietic cell lineage	13	5.8296	5.183e-09	CR2, CD3D, CD3E, FCER2, CD1C, ITGA4, IL6R, IL7R, ITGAM, CD37, MS4A1, CD5, CSF2RA	105	87	6879	9.78949	8.55194e-07	8.55194e-07	6.29129e-06
KEGG_PATHWAY	hsa05340:Primary immunodeficiency	9	4.03587	2.7287e-08	CIITA, PTPRC, CD3D, CD3E, RFX5, IL2RG, CD40, IL7R, BLNK	105	34	6879	17.342	4.50234e-06	2.25117e-06	3.31218e-05
KEGG_PATHWAY	hsa05166:HTLV-I infection	19	8.52018	3.43812e-08	ITGAL, HRAS, IL2RB, CD3D, CD3E, STAT5A, RELB, PIK3CD, NFKB1, NFKB2, CD40, DVL1, VCAM1, ETS1, JAK1, IL2RG, JAK3, MAP3K14, TP53INP1	105	254	6879	4.90067	5.67288e-06	1.89096e-06	4.1733e-05
KEGG_PATHWAY	hsa04064:NF-kappa B signaling pathway	12	5.38117	5.95075e-08	TRAF1, VCAM1, CCL21, RELB, CCL19, NFKB1, NFKB2, CD40, BIRC3, MAP3K14, LTB, BLNK	105	87	6879	9.03645	9.81869e-06	2.45468e-06	7.22321e-05
KEGG_PATHWAY	hsa05169:Epstein-Barr virus infection	12	5.38117	1.92288e-06	ITGAL, CR2, FCER2, PIK3CD, RELB, JAK1, NFKB1, NFKB2, JAK3, CD40, MAP3K14, SPN	105	122	6879	6.44403	0.000317225	6.34531e-05	0.00233403
KEGG_PATHWAY	hsa04060:Cytokine-cytokine receptor interaction	16	7.17489	3.10752e-06	IL2RB, TNFRSF17, CCL19, IL6R, CXCR3, CD40, IL7R, CCR7, CXCR4, CCL21, CXCL13, CSF2RB, IL2RG, FAS, LTB, CSF2RA	105	243	6879	4.3137	0.00051261	8.54533e-05	0.00377195
KEGG_PATHWAY	hsa04062:Chemokine signaling pathway	14	6.27803	3.85758e-06	HRAS, PREX1, PIK3CD, CCL19, NFKB1, CXCR3, ELMO1, CCR7, CXCR4, CCL21, CXCL13, PTK2B, RASGRP2, JAK3	105	186	6879	4.93118	0.000636299	9.09247e-05	0.00468235
KEGG_PATHWAY	hsa04514:Cell adhesion molecules (CAMs)	12	5.38117	8.49887e-06	VCAM1, ITGAL, PTPRC, CLDN3, SELL, MADCAM1, ITGA4, CD40, CD6, SELPLG, ITGAM, SPN	105	142	6879	5.53642	0.00140134	0.000175275	0.0103157
KEGG_PATHWAY	hsa05200:Pathways in cancer	18	8.07175	7.22307e-05	TRAF1, HRAS, ARHGEF1, STAT5A, PIK3CD, LEF1, NFKB1, NFKB2, BIRC3, DVL1, RASSF5, CXCR4, ETS1, RASGRP2, JAK1, PTCH2, FAS, CSF2RA	105	393	6879	3.00065	0.0118478	0.0013234	0.0876407
KEGG_PATHWAY	hsa05162:Measles	10	4.4843	0.000167467	IL2RB, CD3D, CD3E, STAT5A, PIK3CD, JAK1, IL2RG, NFKB1, FAS, JAK3	105	133	6879	4.92589	0.027256	0.00275962	0.203087
KEGG_PATHWAY	hsa04630:Jak-STAT signaling pathway	10	4.4843	0.000321068	IL2RB, STAT5A, PIK3CD, CSF2RB, JAK1, IL2RG, IL6R, JAK3, IL7R, CSF2RA	105	145	6879	4.51823	0.0516054	0.00480521	0.389026
KEGG_PATHWAY	hsa04670:Leukocyte transendothelial migration	9	4.03587	0.000323951	VCAM1, ITGAL, RASSF5, CLDN3, CXCR4, PTK2B, PIK3CD, ITGA4, ITGAM	105	115	6879	5.1272	0.0520567	0.00444514	0.392513
KEGG_PATHWAY	hsa04672:Intestinal immune network for IgA production	6	2.69058	0.000664417	CXCR4, TNFRSF17, MADCAM1, ITGA4, CD40, MAP3K14	105	47	6879	8.36353	0.103866	0.0084003	0.803513
KEGG_PATHWAY	hsa05221:Acute myeloid leukemia	6	2.69058	0.001486	HRAS, STAT5A, PIK3CD, LEF1, NFKB1, PIM2	105	56	6879	7.01939	0.217587	0.0173739	1.78891
KEGG_PATHWAY	hsa04210:Apoptosis	6	2.69058	0.00234375	PIK3CD, CSF2RB, NFKB1, FAS, BIRC3, MAP3K14	105	62	6879	6.34009	0.321026	0.0254812	2.80808
KEGG_PATHWAY	hsa04380:Osteoclast differentiation	8	3.58744	0.00355268	SIRPG, PIK3CD, RELB, JAK1, NFKB1, NFKB2, MAP3K14, BLNK	105	131	6879	4.00087	0.444138	0.0360369	4.22805
KEGG_PATHWAY	hsa04662:B cell receptor signaling pathway	6	2.69058	0.00374547	HRAS, CR2, PIK3CD, NFKB1, INPP5D, BLNK	105	69	6879	5.69689	0.461605	0.0357661	4.45273
KEGG_PATHWAY	hsa04660:T cell receptor signaling pathway	7	3.13901	0.00390968	PTPRC, HRAS, CD3D, CD3E, PIK3CD, NFKB1, MAP3K14	105	100	6879	4.586	0.476051	0.0352719	4.64372
KEGG_PATHWAY	hsa04668:TNF signaling pathway	7	3.13901	0.00544624	TRAF1, VCAM1, PIK3CD, NFKB1, FAS, BIRC3, MAP3K14	105	107	6879	4.28598	0.593871	0.0463185	6.41395
KEGG_PATHWAY	hsa04151:PI3K-Akt signaling pathway	13	5.8296	0.00561462	IL2RB, HRAS, EFNA1, PIK3CD, TCL1A, RHEB, JAK1, IL2RG, NFKB1, IL6R, ITGA4, JAK3, IL7R	105	345	6879	2.46865	0.60506	0.0453888	6.60609
KEGG_PATHWAY	hsa04014:Ras signaling pathway	9	4.03587	0.0206759	RASSF5, HRAS, ETS1, EFNA1, PIK3CD, RASGRP2, RASAL3, NFKB1, PLA2G2D	105	226	6879	2.60898	0.968168	0.15139	22.3999
KEGG_PATHWAY	hsa05161:Hepatitis B	7	3.13901	0.0221766	HRAS, PTK2B, STAT5A, PIK3CD, JAK1, NFKB1, FAS	105	145	6879	3.16276	0.975284	0.154812	23.831
KEGG_PATHWAY	hsa05203:Viral carcinogenesis	8	3.58744	0.0351651	TRAF1, HRAS, STAT5A, PIK3CD, JAK1, NFKB1, NFKB2, JAK3	105	205	6879	2.55666	0.997279	0.226488	35.2432
KEGG_PATHWAY	hsa04650:Natural killer cell mediated cytotoxicity	6	2.69058	0.0370125	CD48, ITGAL, HRAS, PTK2B, PIK3CD, FAS	105	122	6879	3.22201	0.998017	0.2284	36.7323
KEGG_PATHWAY	hsa05144:Malaria	4	1.79372	0.0374512	KLRB1, VCAM1, ITGAL, CD40	105	49	6879	5.3481	0.99816	0.222697	37.0812
KEGG_PATHWAY	hsa04810:Regulation of actin cytoskeleton	8	3.58744	0.0392818	ITGAL, HRAS, ARHGEF1, ARHGEF6, PIK3CD, NCKAP1L, ITGA4, ITGAM	105	210	6879	2.49578	0.998656	0.224554	38.5184
KEGG_PATHWAY	hsa04015:Rap1 signaling pathway	8	3.58744	0.0392818	ITGAL, RASSF5, HRAS, EFNA1, PIK3CD, RASGRP2, APBB1IP, ITGAM	105	210	6879	2.49578	0.998656	0.224554	38.5184
KEGG_PATHWAY	hsa05202:Transcriptional misregulation in cancer	7	3.13901	0.040362	TRAF1, IL2RB, HOXA10, PAX5, NFKB1, CD40, ITGAM	105	167	6879	2.74611	0.998884	0.222579	39.3523
KEGG_PATHWAY	hsa05150:Staphylococcus aureus infection	4	1.79372	0.0477901	ITGAL, SELPLG, ITGAM, PTAFR	105	54	6879	4.85291	0.99969	0.250667	44.8112
KEGG_PATHWAY	hsa04144:Endocytosis	8	3.58744	0.0718328	IL2RB, HRAS, SMAP2, CYTH1, CXCR4, CHMP7, IL2RG, WIPF1	105	241	6879	2.17475	0.999995	0.345659	59.539
KEGG_PATHWAY	hsa05142:Chagas disease (American trypanosomiasis)	5	2.24215	0.0721095	CD3D, CD3E, PIK3CD, NFKB1, FAS	105	104	6879	3.14973	0.999996	0.337429	59.6852
KEGG_PATHWAY	hsa05212:Pancreatic cancer	4	1.79372	0.0748567	ARHGEF6, PIK3CD, JAK1, NFKB1	105	65	6879	4.03165	0.999997	0.339086	61.1104
KEGG_PATHWAY	hsa05145:Toxoplasmosis	5	2.24215	0.0846733	CIITA, JAK1, NFKB1, CD40, BIRC3	105	110	6879	2.97792	1	0.36631	65.8337
KEGG_PATHWAY	hsa04917:Prolactin signaling pathway	4	1.79372	0.0919272	HRAS, STAT5A, PIK3CD, NFKB1	105	71	6879	3.69095	1	0.382548	68.9791
KEGG_PATHWAY	hsa05140:Leishmaniasis	4	1.79372	0.0919272	JAK1, NFKB1, ITGA4, ITGAM	105	71	6879	3.69095	1	0.382548	68.9791
KEGG_PATHWAY	hsa05220:Chronic myeloid leukemia	4	1.79372	0.0949178	HRAS, STAT5A, PIK3CD, NFKB1	105	72	6879	3.63968	1	0.383675	70.1966

## Sheet: blue module
Supplementary Table 5. Two hub modules related pathway enrichment.
Category	Term	Count	%	PValue	Genes	List Total	Pop Hits	Pop Total	Fold Enrichment	Bonferroni	Benjamini	FDR
KEGG_PATHWAY	ptr04810:Regulation of actin cytoskeleton	52	0.0191673	8.73427e-10	ENAH, HRAS, FGF7, WASF1, WASF2, GNA12, FGF10, PIP5K1C, VCL, GSN, RRAS, PDGFC, MSN, ARHGEF1, ROCK1, ARHGEF6, PIK3CD, ACTN1, ACTN2, PPP1CB, PPP1CA, CHRM2, ARPC5L, CFL2, CFL1, ITGAL, FGFR1, PPP1R12B, MRAS, PPP1R12C, ARPC4, RDX, GNG12, ITGB1, ITGAM, MYL9, ARPC3, ITGAV, PPP1R12A, PIK3R1, ACTB, ITGA1, NCKAP1L, MYL12B, ITGA4, ITGA9, ITGA5, ITGA8, ITGA7, PIP4K2A, MYLK, PIP4K2B	675	216	6946	2.47731	2.41066e-07	2.41066e-07	1.15231e-06
KEGG_PATHWAY	ptr04510:Focal adhesion	50	0.0184301	2.44821e-09	HRAS, TLN1, VCL, ILK, PDGFC, ZYX, SHC2, AKT3, PRKCA, ROCK1, PIK3CD, ACTN1, ACTN2, FLNC, PPP1CB, PRKCB, VEGFB, VEGFC, PPP1CA, JUN, LAMC1, PARVA, CAV1, TNC, PPP1R12B, PPP1R12C, ITGB1, MYL9, LAMB2, ITGAV, PPP1R12A, PIK3R1, THBS3, THBS4, ACTB, TNXB, ITGA1, MYL12B, ITGA4, BIRC3, COL4A6, COL4A5, LAMA2, ITGA9, LAMA4, ITGA5, ITGA8, ITGA7, RAP1A, MYLK	675	209	6946	2.46181	6.75704e-07	3.37852e-07	3.22992e-06
KEGG_PATHWAY	ptr05200:Pathways in cancer	70	0.0258021	4.34006e-07	HRAS, FGF7, ADCY5, STAT5A, STAT5B, GNA12, FGF10, NFKB1, NFKB2, CXCL12, TGFB2, EDNRA, CXCR4, RALA, PRKACA, FAS, PRKACB, GNG5, AKT3, PRKCA, ARHGEF1, ROCK1, PIK3CD, CYCS, LEF1, DAPK3, PRKCB, VEGFB, SMO, VEGFC, GNAQ, JUN, GNB4, LAMC1, WNT9A, BID, TRAF1, FGFR1, CKS1B, GNAI1, CDH1, GNG12, KIT, ITGB1, TCF7L1, TPM3, LAMB2, ITGAV, RASGRP2, TRAF5, PIK3R1, TRAF4, TGFBR1, TGFBR2, FZD1, BIRC3, COL4A6, STAT3, …	675	392	6946	1.83757	0.000119779	3.99278e-05	0.000572583
KEGG_PATHWAY	ptr05414:Dilated cardiomyopathy	26	0.00958363	4.94446e-07	ADCY5, TPM2, TPM1, ITGB1, TPM3, TGFB2, DES, DMD, ITGAV, PRKACA, PRKACB, ACTB, CACNA2D1, ACTC1, ITGA1, ITGA4, ITGA9, ADCY9, ITGA5, PLN, ITGA8, ITGA7, SGCD, CACNA1C, SGCA, SGCB	675	88	6946	3.04034	0.000136458	3.41162e-05	0.00065232
KEGG_PATHWAY	ptr04670:Leukocyte transendothelial migration	30	0.011058	1.17816e-06	ITGAL, CLDN7, CLDN4, CLDN3, GNAI1, CLDN5, ITGB1, CXCL12, ITGAM, VCL, MYL9, VCAM1, PTK2B, CXCR4, MSN, PIK3R1, PRKCA, ACTB, F11R, ROCK1, PIK3CD, ACTN1, MYL12B, ACTN2, ITGA4, PRKCB, RASSF5, RAP1A, JAM2, JAM3	675	116	6946	2.6613	0.00032512	6.50324e-05	0.00155434
KEGG_PATHWAY	ptr04270:Vascular smooth muscle contraction	31	0.0114266	1.35415e-06	MYL6, PPP1R12B, CALD1, ADCY5, GNA12, PPP1R12C, MRVI1, PRKG1, KCNMB1, MYL9, EDNRA, ACTG2, PPP1R12A, PRKACA, PRKACB, RAMP1, PPP1R14A, PRKCA, KCNMA1, ARHGEF1, ROCK1, ACTA2, PPP1CB, PRKCB, PPP1CA, ADCY9, GNAQ, CACNA1C, PLA2G2D, MYLK, CALM1	675	123	6946	2.59351	0.000373677	6.22891e-05	0.00178652
KEGG_PATHWAY	ptr04022:cGMP-PKG signaling pathway	36	0.0132696	2.05871e-06	MEF2A, GNAI1, ADCY5, MRVI1, GNA12, PRKG1, SRF, KCNMB1, MYL9, EDNRA, ATP2B4, PPP3CB, CREB3L2, PPP1R12A, INSR, AKT3, KCNMA1, ROCK1, SLC25A4, SLC25A5, PDE3A, ATP1A2, PPP1CB, IRS1, VDAC1, PPIF, MEF2D, PPP1CA, RGS2, ADCY9, GNAQ, PLN, PDE5A, CACNA1C, MYLK, CALM1	675	158	6946	2.34464	0.000568044	8.11689e-05	0.00271603
KEGG_PATHWAY	ptr05166:HTLV-I infection	49	0.0180615	6.49639e-06	HRAS, TLN1, TSPO, ADCY5, STAT5A, STAT5B, NFKB1, PTTG1, NFKB2, TGFB2, RANBP3, RRAS, PRKACA, RANBP1, PRKACB, AKT3, EGR1, SLC25A4, CD3D, SLC25A5, CD3E, PIK3CD, RELB, CD40, JUN, WNT9A, MAP3K14, CRTC3, ITGAL, MRAS, CALR, SRF, VCAM1, MAP3K3, PPP3CB, IL2RG, PIK3R1, IL2RB, KAT2B, TGFBR1, TGFBR2, FZD1, FZD7, VDAC1, DVL1, ADCY9, ETS1, JAK1, TP53INP1	675	259	6946	1.94683	0.0017914	0.000224101	0.00857035
KEGG_PATHWAY	ptr05205:Proteoglycans in cancer	40	0.014744	1.83461e-05	FGFR1, HRAS, CAV1, PPP1R12B, CAMK2G, MRAS, PPP1R12C, RPS6KB2, RDX, ITGB1, TIMP3, SDC2, TGFB2, ITGAV, PPP1R12A, RRAS, PRKACA, FAS, PRKACB, MSN, AKT3, PIK3R1, PRKCA, ACTB, ARHGEF1, ROCK1, HCLS1, PIK3CD, HSPG2, FZD1, FLNC, PPP1CB, STAT3, FZD7, PRKCB, SMO, PPP1CA, ITGA5, PTCH1, WNT9A	675	202	6946	2.0377	0.00505078	0.000562462	0.0242013
KEGG_PATHWAY	ptr05410:Hypertrophic cardiomyopathy (HCM)	22	0.00810922	2.8896e-05	ACTB, CACNA2D1, ACTC1, PRKAB2, ITGA1, ITGA4, TPM2, TPM1, ITGB1, TGFB2, TPM3, ITGA9, DES, ITGA5, DMD, ITGA8, ITGAV, ITGA7, SGCD, CACNA1C, SGCA, SGCB	675	83	6946	2.72757	0.00794368	0.000797222	0.0381157
KEGG_PATHWAY	ptr04514:Cell adhesion molecules (CAMs)	31	0.0114266	5.83411e-05	ITGAL, CLDN7, CLDN4, CLDN3, CLDN5, CDH1, ITGB1, ITGAM, SDC2, SDC3, VCAM1, ITGAV, CNTNAP1, CD6, SELPLG, SPN, SELP, PTPRC, F11R, NRXN3, SELL, NFASC, NLGN2, ITGA4, CD40, NCAM1, ITGA9, ITGA8, MADCAM1, JAM2, JAM3	675	147	6946	2.17008	0.0159737	0.0014628	0.0769421
KEGG_PATHWAY	ptr05412:Arrhythmogenic right ventricular cardiomyopathy (ARVC)	19	0.00700342	6.91196e-05	ACTB, CACNA2D1, ITGA1, GJA1, LEF1, ITGA4, ITGB1, TCF7L1, ITGA9, DES, ITGA5, DMD, ITGA8, ITGAV, ITGA7, SGCD, CACNA1C, SGCA, SGCB	675	69	6946	2.83358	0.0188969	0.00158854	0.0911511
KEGG_PATHWAY	ptr04666:Fc gamma R-mediated phagocytosis	21	0.00774062	0.00015877	PRKCA, PTPRC, MARCKSL1, WASF1, PIK3CD, WASF2, RPS6KB2, PIP5K1C, ARPC4, PLPP1, PLPP3, PLPP2, PRKCB, ARPC3, GSN, ARPC5L, CFL2, CFL1, INPP5D, AKT3, PIK3R1	675	86	6946	2.51276	0.0428776	0.0033654	0.209263
KEGG_PATHWAY	ptr04932:Non-alcoholic fatty liver disease (NAFLD)	31	0.0114266	0.000228761	NDUFB3, BID, UQCRC1, CYC1, NFKB1, COX7A2L, COX5A, UQCRQ, COX5B, NDUFS6, UQCR10, COX6B1, MLXIP, FAS, NDUFS3, INSR, NDUFS2, AKT3, PIK3R1, COX7A1, NDUFA8, CYCS, PIK3CD, PRKAB2, COX8A, IL6R, NDUFA1, IRS1, JUN, NDUFV1, MLX	675	158	6946	2.019	0.0611929	0.00450022	0.301384
KEGG_PATHWAY	ptr04921:Oxytocin signaling pathway	30	0.011058	0.00046833	MYL6, HRAS, GNAI1, PPP1R12B, ADCY5, CAMK2G, PPP1R12C, MYL9, PPP1R12A, PPP3CB, PRKACA, PRKACB, PRKCA, ACTB, CACNA2D1, GNAO1, ROCK1, PRKAB2, RCAN1, PPP1CB, PRKCB, PPP1CA, RGS2, ADCY9, GNAQ, JUN, CACNA1C, MYLK, CALM1, CAMK1D	675	157	6946	1.96631	0.12128	0.00858226	0.616107
KEGG_PATHWAY	ptr05100:Bacterial invasion of epithelial cells	19	0.00700342	0.000513812	ACTB, CAV1, ARHGEF26, HCLS1, WASF1, PIK3CD, WASF2, ARPC4, CDH1, ITGB1, ELMO3, VCL, ELMO1, ARPC3, ITGA5, ARPC5L, ILK, SHC2, PIK3R1	675	80	6946	2.44396	0.132247	0.00882635	0.675753
KEGG_PATHWAY	ptr04015:Rap1 signaling pathway	37	0.0136382	0.000667138	ITGAL, FGFR1, TLN1, HRAS, FGF7, EFNA1, GNAI1, MRAS, ADCY5, FGF10, CDH1, KIT, ITGB1, APBB1IP, ITGAM, RASGRP2, RALA, RRAS, PDGFC, INSR, AKT3, PIK3R1, PRKCA, ACTB, GNAO1, PIK3CD, SIPA1L2, PRKCB, VEGFB, VEGFC, RASSF5, ADCY9, GNAQ, RAP1A, NGFR, EFNA4, CALM1	675	214	6946	1.77918	0.168224	0.0107763	0.876585
KEGG_PATHWAY	ptr04530:Tight junction	20	0.00737202	0.000727589	ACTB, F11R, CLDN7, CLDN4, CLDN3, HCLS1, CLDN5, YBX3, ACTN1, CRB3, MYL12B, ACTN2, AMOTL1, LLGL2, MYL9, MYH11, TJP3, JAM2, JAM3, MYH10	675	89	6946	2.31244	0.181996	0.0110984	0.955662
KEGG_PATHWAY	ptr04014:Ras signaling pathway	39	0.0143754	0.000744403	FGFR1, HRAS, FGF7, RAB5B, EFNA1, MRAS, FGF10, NFKB1, GNG12, KIT, FOXO4, RGL1, RASAL3, RASGRP2, RALA, RRAS, PRKACA, PDGFC, PRKACB, RASA3, SHC2, INSR, GNG5, AKT3, PIK3R1, PRKCA, PIK3CD, PRKCB, VEGFB, VEGFC, RASSF5, ETS1, RAP1A, GNB4, NGFR, EFNA4, ABL1, PLA2G2D, CALM1	675	231	6946	1.73734	0.185786	0.0107592	0.977646
KEGG_PATHWAY	ptr05012:Parkinson's disease	28	0.0103208	0.00109421	NDUFB3, UQCRC1, GNAI1, ADCY5, CYC1, UBE2G2, PINK1, COX7A2L, COX5A, UQCRQ, COX5B, NDUFS6, UQCR10, COX6B1, PRKACA, PRKACB, NDUFS3, NDUFS2, SLC25A4, NDUFA8, COX7A1, SLC25A5, CYCS, COX8A, NDUFA1, VDAC1, PPIF, NDUFV1	675	150	6946	1.92087	0.260786	0.0149948	1.434
KEGG_PATHWAY	ptr04062:Chemokine signaling pathway	31	0.0114266	0.00147722	HRAS, GNAI1, CXCL3, PREX1, ADCY5, STAT5B, NFKB1, CXCR3, GNG12, CXCL12, PTK2B, CCL21, CXCR4, RASGRP2, PRKACA, PRKACB, GNG5, SHC2, AKT3, PIK3R1, ROCK1, PIK3CD, CCL19, STAT3, ELMO1, CCR7, ADCY9, ARRB1, CXCL13, RAP1A, GNB4	675	176	6946	1.81251	0.33503	0.0192417	1.93144
KEGG_PATHWAY	ptr04720:Long-term potentiation	16	0.00589762	0.00181901	PRKCA, HRAS, CAMK2G, PPP1CB, PRKCB, PPP1CA, GNAQ, RPS6KA1, RPS6KA2, PPP1R1A, PPP3CB, RAP1A, PRKACA, PRKACB, CACNA1C, CALM1	675	68	6946	2.42126	0.394986	0.0225822	2.37339
KEGG_PATHWAY	ptr04512:ECM-receptor interaction	19	0.00700342	0.00190988	TNXB, TNC, HSPG2, ITGA1, ITGA4, ITGB1, COL4A6, COL4A5, LAMA2, ITGA9, LAMA4, LAMB2, ITGA5, ITGA8, ITGAV, ITGA7, LAMC1, THBS3, THBS4	675	89	6946	2.19682	0.409999	0.0226793	2.49057
KEGG_PATHWAY	ptr04611:Platelet activation	25	0.00921503	0.00217214	TLN1, GNAI1, ADCY5, PTGS1, PRKG1, APBB1IP, ITGB1, RASGRP2, PPP1R12A, PRKACA, PRKACB, PIK3R1, AKT3, ACTB, ARHGEF1, ROCK1, PIK3CD, MYL12B, PPP1CB, PPP1CA, GNAQ, ADCY9, VAMP8, RAP1A, MYLK	675	134	6946	1.91985	0.451278	0.0246967	2.82807
KEGG_PATHWAY	ptr05222:Small cell lung cancer	19	0.00700342	0.00217718	TRAF1, CKS1B, PIK3CD, CYCS, NFKB1, BIRC3, ITGB1, COL4A6, COL4A5, LAMA2, LAMA4, LAMB2, ITGAV, CKS2, LAMC1, TRAF5, AKT3, PIK3R1, TRAF4	675	90	6946	2.17241	0.452041	0.023775	2.83453
KEGG_PATHWAY	ptr05221:Acute myeloid leukemia	14	0.00516042	0.00263163	HRAS, STAT5A, STAT5B, PIK3CD, LEF1, RPS6KB2, NFKB1, PIM2, KIT, TCF7L1, STAT3, EIF4EBP1, PIK3R1, AKT3	675	57	6946	2.52746	0.516782	0.027585	3.41675
KEGG_PATHWAY	ptr04916:Melanogenesis	20	0.00737202	0.0027308	PRKCA, HRAS, GNAO1, GNAI1, ADCY5, CAMK2G, FZD1, LEF1, KIT, FZD7, TCF7L1, PRKCB, DVL1, ADCY9, GNAQ, CREB3L2, PRKACA, PRKACB, WNT9A, CALM1	675	99	6946	2.07886	0.529863	0.0275659	3.54337
KEGG_PATHWAY	ptr05146:Amoebiasis	21	0.00774062	0.00295661	PRKCA, GNA14, RAB5B, PIK3CD, ACTN1, NFKB1, ACTN2, ITGAM, COL4A6, TGFB2, COL4A5, VCL, PRKCB, LAMA2, LAMA4, LAMB2, GNAQ, PRKACA, PRKACB, LAMC1, PIK3R1	675	107	6946	2.01961	0.558348	0.0287651	3.83111
KEGG_PATHWAY	ptr04151:PI3K-Akt signaling pathway	50	0.0184301	0.00297971	HRAS, FGF7, PPP2R5B, EFNA1, FGF10, RPS6KB2, NFKB1, EIF4EBP1, IL4R, CREB3L2, PDGFC, GNG5, INSR, AKT3, PIK3CD, IL6R, IRS1, VEGFB, VEGFC, CHRM2, GNB4, EFNA4, NGFR, LAMC1, FGFR1, TNC, TCL1A, GNG12, KIT, IL7R, ITGB1, LAMB2, ITGAV, IL2RG, PIK3R1, THBS3, THBS4, IL2RB, TNXB, ITGA1, ITGA4, COL4A6, COL4A5, LAMA2, ITGA9, LAMA4, ITGA5, ITGA8, ITGA7, JAK1	675	341	6946	1.50885	0.561163	0.0280014	3.86051
KEGG_PATHWAY	ptr04713:Circadian entrainment	19	0.00700342	0.00358098	PRKCA, GNAO1, GNAI1, ADCY5, CAMK2G, GNG12, PRKG1, PRKCB, ADCY9, GNAQ, PER1, CACNA1H, GNB4, PRKACA, PRKACB, PER3, CACNA1C, GNG5, CALM1	675	94	6946	2.07997	0.62847	0.0324655	4.62262
KEGG_PATHWAY	ptr04260:Cardiac muscle contraction	17	0.00626622	0.00375427	CACNA2D1, ACTC1, UQCRC1, COX7A1, COX8A, CYC1, COX7A2L, ATP1A2, TPM2, COX5A, TPM1, UQCRQ, COX5B, TPM3, UQCR10, COX6B1, CACNA1C	675	80	6946	2.1867	0.645883	0.0329335	4.84122
KEGG_PATHWAY	ptr04725:Cholinergic synapse	21	0.00774062	0.00411672	PRKCA, HRAS, GNAO1, GNAI1, ADCY5, CAMK2G, PIK3CD, GNG12, PRKCB, ADCY9, GNAQ, CHRM2, CREB3L2, GNB4, PRKACA, PRKACB, CACNA1C, GNG5, CHRNA3, AKT3, PIK3R1	675	110	6946	1.96453	0.67972	0.0349544	5.29695
KEGG_PATHWAY	ptr04010:MAPK signaling pathway	39	0.0143754	0.00521579	FGFR1, HRAS, FGF7, MRAS, GNA12, FGF10, NFKB1, GNG12, NFKB2, SRF, TGFB2, MAP3K6, HSPA2, MAP3K3, RASGRP2, PPP3CB, RRAS, PRKACA, FAS, PRKACB, AKT3, PRKCA, CACNA2D1, TGFBR1, TGFBR2, RELB, FLNC, PRKCB, DUSP3, DUSP1, RPS6KA1, ARRB1, RPS6KA2, JUN, CACNA1H, RAP1A, MAP3K14, GADD45B, CACNA1C	675	257	6946	1.56157	0.763859	0.0427944	6.66658
KEGG_PATHWAY	ptr04150:mTOR signaling pathway	13	0.00479181	0.00863545	PRKCA, EIF4EBP1, CAB39L, RPS6KA1, ULK1, RPS6KA2, PIK3CD, RRAGA, RPS6KB2, IRS1, AKT3, PIK3R1, PRKCB	675	58	6946	2.30646	0.908712	0.0679827	10.8119
KEGG_PATHWAY	ptr04640:Hematopoietic cell lineage	16	0.00589762	0.00912548	CR2, CD3D, CD3E, FCER2, CD1C, ITGA1, IL6R, KIT, ITGA4, IL7R, ITGAM, CD37, ITGA5, IL4R, MS4A1, CD5	675	80	6946	2.05807	0.920357	0.0697401	11.3917
KEGG_PATHWAY	ptr05144:Malaria	12	0.00442321	0.00988456	VCAM1, KLRB1, SELP, ITGAL, GYPC, CD81, ACKR1, CD40, SDC2, THBS3, TGFB2, THBS4	675	52	6946	2.3747	0.93554	0.0733308	12.2831
KEGG_PATHWAY	ptr05010:Alzheimer's disease	28	0.0103208	0.0114766	NDUFB3, BID, HSD17B10, UQCRC1, CYC1, COX7A2L, COX5A, UQCRQ, COX5B, NDUFS6, UQCR10, COX6B1, PPP3CB, FAS, NDUFS3, NDUFS2, GAPDH, COX7A1, NDUFA8, CYCS, COX8A, NDUFA1, GNAQ, NDUFV1, BACE1, CACNA1C, APBB1, CALM1	675	177	6946	1.62786	0.958657	0.0825015	14.1258
KEGG_PATHWAY	ptr05031:Amphetamine addiction	14	0.00516042	0.0125145	PRKCA, PPP1CA, JUN, CAMK2G, ADCY5, MAOB, PPP3CB, CREB3L2, PRKACA, PRKACB, CACNA1C, PPP1CB, CALM1, PRKCB	675	68	6946	2.11861	0.969063	0.0874096	15.3077
KEGG_PATHWAY	ptr04923:Regulation of lipolysis in adipocytes	12	0.00442321	0.0150082	ADCY9, GNAI1, ADCY5, PIK3CD, PTGS1, PRKACA, PRKACB, PRKG1, IRS1, INSR, AKT3, PIK3R1	675	55	6946	2.24517	0.984604	0.10149	18.0863
KEGG_PATHWAY	ptr04261:Adrenergic signaling in cardiomyocytes	23	0.00847782	0.0153779	ACTC1, CACNA2D1, PPP2R5B, GNAI1, CAMK2G, ADCY5, ATP1A2, TPM2, TPM1, PPP1CB, TPM3, PPP1CA, ATP2B4, ADCY9, GNAQ, PLN, PPP1R1A, CREB3L2, PRKACA, PRKACB, CACNA1C, AKT3, CALM1	675	140	6946	1.69056	0.98612	0.101413	18.491
KEGG_PATHWAY	ptr04210:Apoptosis	14	0.00516042	0.0158298	BID, CFLAR, AIFM1, PIK3CD, CYCS, NFKB1, BIRC3, CASP6, ENDOG, CSF2RB, FAS, MAP3K14, PIK3R1, AKT3	675	70	6946	2.05807	0.987771	0.101846	18.9832
KEGG_PATHWAY	ptr04141:Protein processing in endoplasmic reticulum	26	0.00958363	0.0182463	SEC31A, PDIA3, UBE2G2, RNF185, UBQLN2, PDIA4, LMAN2, CALR, DERL3, BAK1, DNAJB11, HSPA2, BAG2, HSPA5, DDOST, SEC23A, P4HB, HERPUD1, CRYAB, ERP29, SKP1, BCAP31, SEC61B, SEC13, SSR4, UBE2E2	675	167	6946	1.60209	0.993796	0.113976	21.5687
KEGG_PATHWAY	ptr04360:Axon guidance	21	0.00774062	0.0182908	HRAS, ROCK1, EFNA1, GNAI1, PLXNB3, DPYSL2, ITGB1, NTN1, SLIT2, SLIT3, EPHA3, EPHA7, ROBO1, CXCR4, CFL2, CFL1, PPP3CB, SEMA4C, SEMA3C, EFNA4, ABL1	675	126	6946	1.71506	0.993873	0.111738	21.6155
KEGG_PATHWAY	ptr04915:Estrogen signaling pathway	17	0.00626622	0.0196334	HRAS, GNAO1, FKBP5, GNAI1, ADCY5, PIK3CD, ADCY9, GNAQ, HSPA2, JUN, CREB3L2, PRKACA, PRKACB, SHC2, AKT3, PIK3R1, CALM1	675	95	6946	1.84143	0.9958	0.116956	23.0181
KEGG_PATHWAY	ptr05340:Primary immunodeficiency	9	0.00331741	0.0196728	CIITA, PTPRC, CD3D, CD3E, RFX5, IL2RG, CD40, IL7R, BLNK	675	36	6946	2.57259	0.995846	0.11473	23.0589
KEGG_PATHWAY	ptr04728:Dopaminergic synapse	21	0.00774062	0.0198095	PRKCA, GNAO1, PPP2R5B, GNAI1, ADCY5, CAMK2G, MAOB, GNG12, PPP1CB, PRKCB, PPP1CA, GNAQ, CREB3L2, PPP3CB, GNB4, PRKACA, PRKACB, CACNA1C, GNG5, AKT3, CALM1	675	127	6946	1.70156	0.996003	0.113124	23.2004
KEGG_PATHWAY	ptr04540:Gap junction	16	0.00589762	0.0211729	PRKCA, HRAS, GNAI1, ADCY5, GJA1, PRKG1, PRKCB, GNAQ, ADCY9, TUBB6, PRKACA, PDGFC, PRKACB, TUBA1A, TUBA1C, TUBB4B	675	88	6946	1.87098	0.997278	0.118094	24.5978
KEGG_PATHWAY	ptr04071:Sphingolipid signaling pathway	20	0.00737202	0.0216184	PRKCA, FCER1A, BID, HRAS, ROCK1, SGMS2, PPP2R5B, GNAI1, PIK3CD, GNA12, NFKB1, PRKCB, S1PR3, GNAQ, S1PR4, SMPD1, DEGS2, AKT3, PIK3R1, DEGS1	675	120	6946	1.71506	0.9976	0.118093	25.0493
KEGG_PATHWAY	ptr04520:Adherens junction	14	0.00516042	0.022004	ACTB, FGFR1, TGFBR1, WASF1, WASF2, TGFBR2, ACTN1, LEF1, CDH1, ACTN2, TCF7L1, VCL, SORBS1, INSR	675	73	6946	1.9735	0.997847	0.117789	25.438
KEGG_PATHWAY	ptr04024:cAMP signaling pathway	29	0.0106894	0.0277452	GNAI1, ADCY5, CAMK2G, NFKB1, MYL9, EDNRA, ATP2B4, PDE4B, PPP1R12A, CREB3L2, RRAS, PRKACA, PRKACB, AKT3, PIK3R1, ROCK1, PIK3CD, PDE3A, ATP1A2, PPP1CB, PPP1CA, ADCY9, CHRM2, JUN, PLN, RAP1A, PTCH1, CACNA1C, CALM1	675	199	6946	1.4996	0.999576	0.143857	31.0105
KEGG_PATHWAY	ptr05032:Morphine addiction	15	0.00552902	0.0331772	PRKCA, GNAO1, GNAI1, ADCY5, PDE3A, GNG12, PRKCB, ADCY9, PDE7A, ARRB1, PDE4B, GNB4, PRKACA, PRKACB, GNG5	675	85	6946	1.81595	0.99991	0.166893	35.9261
KEGG_PATHWAY	ptr04931:Insulin resistance	18	0.00663482	0.0354024	PIK3CD, PRKAB2, RPS6KB2, NFKB1, IRS1, PPP1CB, STAT3, PPP1CA, PPP1R3C, SLC2A4, RPS6KA1, RPS6KA2, MLX, CREB3L2, MLXIP, INSR, AKT3, PIK3R1	675	110	6946	1.68388	0.999952	0.174125	37.8446
KEGG_PATHWAY	ptr05020:Prion diseases	8	0.00294881	0.0358687	EGR1, NCAM1, C7, PRKACA, LAMC1, PRKACB, HSPA5, PRNP	675	33	6946	2.49464	0.999958	0.173223	38.2398
KEGG_PATHWAY	ptr04012:ErbB signaling pathway	15	0.00552902	0.0362433	PRKCA, HRAS, CAMK2G, STAT5A, STAT5B, PIK3CD, BTC, RPS6KB2, PRKCB, EIF4EBP1, JUN, ABL1, SHC2, PIK3R1, AKT3	675	86	6946	1.79483	0.999962	0.171952	38.5557
KEGG_PATHWAY	ptr04020:Calcium signaling pathway	26	0.00958363	0.0390445	GNA14, TACR2, CAMK2G, ITPKB, ITPKA, EDNRA, ATP2B4, PTK2B, PPP3CB, PRKACA, PRKACB, PRKCA, SLC25A4, SLC25A5, PRKCB, VDAC1, PPIF, ADCY9, GNAQ, CHRM2, PLN, CACNA1H, CACNA1C, MYLK, PTAFR, CALM1	675	179	6946	1.49469	0.999983	0.181155	40.8705
KEGG_PATHWAY	ptr04910:Insulin signaling pathway	21	0.00774062	0.0436366	HRAS, PIK3CD, PRKAB2, RPS6KB2, RHOQ, HK1, IRS1, PPP1CB, PRKAR2B, PPP1CA, PPP1R3C, EIF4EBP1, SLC2A4, SORBS1, PRKACA, PRKACB, INSR, SHC2, AKT3, PIK3R1, CALM1	675	138	6946	1.56593	0.999996	0.197401	44.4916
KEGG_PATHWAY	ptr05145:Toxoplasmosis	18	0.00663482	0.0442535	CIITA, GNAO1, GNAI1, CYCS, NFKB1, CD40, BIRC3, ITGB1, STAT3, TGFB2, PPIF, LAMA2, LAMA4, LAMB2, HSPA2, JAK1, LAMC1, AKT3	675	113	6946	1.63917	0.999996	0.196812	44.9622
KEGG_PATHWAY	ptr04068:FoxO signaling pathway	20	0.00737202	0.0449802	HRAS, GABARAPL1, TGFBR1, PIK3CD, PRKAB2, TGFBR2, FOXO4, IL7R, IRS1, STAT3, TGFB2, SLC2A4, S1PR4, SETD7, BCL6, FBXO32, GADD45B, INSR, AKT3, PIK3R1	675	130	6946	1.58313	0.999997	0.196684	45.5117
KEGG_PATHWAY	ptr05142:Chagas disease (American trypanosomiasis)	17	0.00626622	0.0486801	CFLAR, GNA14, GNAO1, CD3D, CD3E, GNAI1, TGFBR1, PIK3CD, TGFBR2, NFKB1, CALR, TGFB2, GNAQ, JUN, FAS, AKT3, PIK3R1	675	106	6946	1.65034	0.999999	0.208205	48.2318
KEGG_PATHWAY	ptr04064:NF-kappa B signaling pathway	15	0.00552902	0.050548	TRAF1, CFLAR, RELB, CCL19, NFKB1, CD40, NFKB2, BIRC3, CXCL12, VCAM1, CCL21, MAP3K14, LTB, TRAF5, BLNK	675	90	6946	1.71506	0.999999	0.212273	49.5569
KEGG_PATHWAY	ptr04919:Thyroid hormone signaling pathway	18	0.00663482	0.0509705	ACTB, PRKCA, HRAS, KAT2B, THRB, PIK3CD, RCAN1, ATP1A2, RCAN2, PRKCB, SLC16A2, NOTCH2, ITGAV, PLN, PRKACA, PRKACB, AKT3, PIK3R1	675	115	6946	1.61067	0.999999	0.210777	49.8523
KEGG_PATHWAY	ptr04727:GABAergic synapse	14	0.00516042	0.0511481	PRKCA, GABARAPL1, GNAO1, GNAI1, ADCY5, GNG12, PRKCB, GLUL, ADCY9, PRKACA, GNB4, PRKACB, CACNA1C, GNG5	675	82	6946	1.75689	0.999999	0.208417	49.976
KEGG_PATHWAY	ptr03050:Proteasome	9	0.00331741	0.0582806	PSMB5, PSMB4, PSMB7, PSMC4, PSMA5, PSMA4, PSMB3, PSMB2, POMP	675	44	6946	2.10485	1	0.23131	54.7158
KEGG_PATHWAY	ptr04066:HIF-1 signaling pathway	15	0.00552902	0.0589957	PRKCA, CAMK2G, PIK3CD, RPS6KB2, HK1, NFKB1, IL6R, STAT3, PRKCB, EIF4EBP1, GAPDH, INSR, AKT3, PIK3R1, ENO1	675	92	6946	1.67778	1	0.230668	55.1674
KEGG_PATHWAY	ptr05016:Huntington's disease	27	0.00995223	0.0608894	NDUFB3, POLR2H, UQCRC1, POLR2L, AP2S1, CYC1, COX7A2L, COX5A, UQCRQ, COX5B, NDUFS6, UQCR10, COX6B1, CREB3L2, NDUFS3, NDUFS2, SLC25A4, COX7A1, NDUFA8, SLC25A5, CYCS, COX8A, NDUFA1, VDAC1, PPIF, GNAQ, NDUFV1	675	196	6946	1.41755	1	0.234137	56.3432
KEGG_PATHWAY	ptr04918:Thyroid hormone synthesis	12	0.00442321	0.061428	GPX2, PRKCA, ADCY9, GNAQ, ADCY5, CREB3L2, PRKACA, ATP1A2, PRKACB, PDIA4, HSPA5, PRKCB	675	68	6946	1.81595	1	0.232878	56.6724
KEGG_PATHWAY	ptr00030:Pentose phosphate pathway	7	0.00258021	0.0646363	ALDOA, GPI, TALDO1, PGD, TKT, RPIA, PFKM	675	30	6946	2.40109	1	0.240624	58.5861
KEGG_PATHWAY	ptr04911:Insulin secretion	14	0.00516042	0.070124	KCNMA1, PRKCA, ADCY5, CAMK2G, ATP1A2, KCNMB1, PRKCB, GNAQ, ADCY9, CREB3L2, PRKACA, VAMP2, PRKACB, CACNA1C	675	86	6946	1.67518	1	0.255537	61.6795
KEGG_PATHWAY	ptr04310:Wnt signaling pathway	20	0.00737202	0.0781295	PRKCA, CAMK2G, FZD1, LEF1, SKP1, DAAM2, TCF7L1, FZD7, DVL1, PRKCB, GPC4, SFRP1, JUN, PRICKLE2, PPP3CB, FRAT2, PRKACA, PRKACB, WNT9A, TBL1X	675	139	6946	1.48063	1	0.277763	65.8107
KEGG_PATHWAY	ptr05231:Choline metabolism in cancer	16	0.00589762	0.0812009	PRKCA, HRAS, WASF1, PIK3CD, WASF2, RPS6KB2, PIP5K1C, PLPP1, PLPP3, PLPP2, PRKCB, EIF4EBP1, JUN, PDGFC, PIK3R1, AKT3	675	105	6946	1.56806	1	0.283883	67.2834
KEGG_PATHWAY	ptr05169:Epstein-Barr virus infection	17	0.00626622	0.083273	ITGAL, CR2, FCER2, PIK3CD, RELB, NFKB1, CD40, NFKB2, STAT3, PSMC4, JUN, JAK1, MAP3K14, TRAF5, AKT3, PIK3R1, SPN	675	114	6946	1.53453	1	0.286794	68.2435
KEGG_PATHWAY	ptr00051:Fructose and mannose metabolism	7	0.00258021	0.0838342	ALDOA, TPI1, GMDS, GMPPA, HK1, PFKM, TSTA3	675	32	6946	2.25102	1	0.285119	68.499
KEGG_PATHWAY	ptr04971:Gastric acid secretion	12	0.00442321	0.0855874	PRKCA, ADCY9, GNAQ, GNAI1, CAMK2G, ADCY5, PRKACA, ATP1A2, PRKACB, MYLK, PRKCB, CALM1	675	72	6946	1.71506	1	0.287006	69.2851
KEGG_PATHWAY	ptr00062:Fatty acid elongation	6	0.00221161	0.0883005	ELOVL1, ACOT7, ELOVL5, ACOT2, ECHS1, TECR	675	25	6946	2.46969	1	0.291634	70.4659
KEGG_PATHWAY	ptr00010:Glycolysis / Gluconeogenesis	11	0.00405461	0.0947012	ALDOA, GPI, TPI1, AKR1A1, ALDH1B1, ADH5, ADH1B, HK1, PFKM, GAPDH, ENO1	675	65	6946	1.74145	1	0.306583	73.0874
KEGG_PATHWAY	ptr04970:Salivary secretion	13	0.00479181	0.0964608	KCNMA1, PRKCA, ADCY5, ATP1A2, PRKG1, PRKCB, ATP2B4, GNAQ, ADCY9, PRKACA, PRKACB, VAMP2, CALM1	675	82	6946	1.6314	1	0.30814	73.7694
KEGG_PATHWAY	ptr00520:Amino sugar and nucleotide sugar metabolism	9	0.00331741	0.0973925	CYB5R3, GPI, NANS, GMDS, GNPNAT1, GMPPA, HK1, GALE, TSTA3	675	49	6946	1.89007	1	0.307389	74.124
